# Supplementary material for: Whole genome sequencing and comparative genomics of Mycobacterium orygis isolated from different animal hosts to identify specific diagnostic markers
Source: Frontiers journal article supplement (doi:10.3389/fcimb.2023.1302393), 2023-12-22
Supplement: Data_Sheet_3.XLS [file Data_Sheet_3.XLS]

## Sheet: Galaxy2835-(SNP_distance_matrix
								Norway									India, WB								India, MP	India, WB	India, Guj	India, WB							Ind, Bih	Ind, Jah	Ind, Wb	Ind, Karn		Canada	India, Che	India, Che	India, Che			Netherlands	USA	USA	USA
	snp-dists 0.6.3	1046_fasta	1137_fasta	154_fasta	155_fasta	C1a_fasta	Deer_1_fasta	539861	543229	550182	565181	605088	HB_fasta	JX25_fasta	M44_fasta	SD_fasta	51C	48C	45C	43C	41C	40C	37C	29C	68B	64C	60D	58C	57D	56D	53C	52C	23D	19C	CMC_E36	CMC_E313	CMC_E120B	CMC_E65	CMC_E374	MUHC/MB/EPTB/Orygis/51145	NIRTKL276	NIRTKL116	NIRTKL036	54C	117C	RIVM1156	IDR1200003374	IDR1100020842	AFB0800000210
	1046_fasta	0	9	47	46	25	70	222	154	171	244	333	160	6	5	74	166	143	138	126	166	165	231	164	143	143	140	166	141	138	167	142	138	128	194	122	168	138	131	149	26	34	77	136	140	280	190	157	276
	1137_fasta	9	0	50	51	28	73	226	155	180	245	333	162	9	6	78	167	144	139	129	167	166	232	167	144	146	141	167	142	141	168	145	139	131	195	125	169	139	134	150	27	35	81	137	141	281	193	161	275
	154_fasta	47	50	0	7	46	87	240	173	194	263	349	178	49	48	94	183	160	157	144	185	184	248	183	159	159	157	185	159	156	184	160	155	145	211	141	187	155	150	168	47	51	95	153	157	295	207	176	293
	155_fasta	46	51	7	0	47	88	240	168	185	262	350	178	50	47	91	184	157	156	139	184	183	249	182	156	156	158	184	154	155	185	155	156	146	212	140	186	156	149	163	48	54	94	154	158	296	208	175	288
	C1a_fasta	25	28	46	47	0	69	221	153	176	243	331	160	27	26	74	165	142	137	125	165	164	230	163	142	142	139	165	140	137	166	141	137	127	193	121	166	137	130	148	1	33	77	135	139	277	189	157	273
	Deer_1_fasta	70	73	87	88	69	0	231	165	184	254	340	169	72	71	87	174	151	148	136	176	175	240	174	151	151	147	176	151	148	175	152	147	136	203	132	178	147	141	159	70	74	88	144	148	286	198	168	285
Norway	539861	222	226	240	240	221	231	0	213	234	245	330	218	225	223	240	211	187	184	224	212	211	276	210	235	235	184	212	236	233	211	236	183	221	291	220	261	235	228	208	222	227	239	232	201	295	248	216	293
	543229	154	155	173	168	153	165	213	0	136	232	321	141	154	153	172	155	126	127	151	155	154	221	155	162	164	129	155	160	165	156	163	128	155	224	153	192	168	162	89	152	158	174	165	135	269	174	52	259
	550182	171	180	194	185	176	184	234	136	0	257	343	163	179	178	194	177	148	151	173	179	178	243	177	184	184	151	179	184	187	178	185	150	174	246	175	217	190	184	131	177	181	194	187	157	289	194	146	283
	565181	244	245	263	262	243	254	245	232	257	0	352	238	1064	243	261	232	209	204	245	232	231	298	232	257	259	206	231	255	254	233	258	205	244	313	242	282	257	251	227	242	248	263	253	224	318	271	238	314
	605088	333	333	349	350	331	340	330	321	343	352	0	324	333	331	345	318	295	292	334	320	319	384	320	342	344	292	320	342	341	319	345	291	329	399	329	368	343	339	314	330	334	344	340	310	406	356	328	403
	HB_fasta	160	162	178	178	160	169	218	141	163	238	324	0	161	160	178	157	135	132	162	159	158	223	159	171	173	132	159	171	170	158	174	131	158	227	158	199	171	167	133	158	162	176	169	139	272	174	145	269
	JX25_fasta	6	9	49	50	27	72	225	154	179	1064	333	161	0	7	78	166	143	138	128	166	165	231	166	143	145	140	166	141	140	167	144	138	130	194	124	168	138	133	149	26	34	81	136	140	282	192	160	275
	M44_fasta	5	6	48	47	26	71	223	153	178	243	331	160	7	0	74	165	142	137	127	165	164	230	165	142	144	139	165	140	139	166	143	137	129	193	123	167	137	132	148	25	33	77	135	139	279	191	158	273
	SD_fasta	74	78	94	91	74	87	240	172	194	261	345	178	78	74	0	183	160	155	143	183	182	249	181	160	160	157	183	158	155	184	159	156	145	212	139	186	156	148	166	75	81	11	153	157	297	207	176	293
India, WB	51C	166	167	183	184	165	174	211	155	177	232	318	157	166	165	183	0	107	104	168	2	1	66	2	177	179	104	2	177	176	1	180	103	164	233	164	205	177	173	148	164	168	182	174	144	266	190	160	263
	48C	143	144	160	157	142	151	187	126	148	209	295	135	143	142	160	107	0	5	139	109	108	173	109	148	150	9	109	148	153	108	151	8	141	209	141	182	154	150	120	141	145	160	150	121	243	168	139	235
	45C	138	139	157	156	137	148	184	127	151	204	292	132	138	137	155	104	5	0	140	104	103	170	104	151	153	6	104	149	148	105	152	5	138	206	136	177	151	145	121	136	142	157	147	118	241	165	134	236
	43C	126	129	144	139	125	136	224	151	173	245	334	162	128	127	143	168	139	140	0	168	167	234	166	139	139	142	168	137	140	169	138	141	130	181	122	170	139	131	141	126	132	145	134	142	280	193	161	270
	41C	166	167	185	184	165	176	212	155	179	232	320	159	166	165	183	2	109	104	168	0	1	68	2	179	181	106	0	177	176	1	180	105	166	235	164	205	179	173	148	164	170	184	176	146	268	192	160	263
	40C	165	166	184	183	164	175	211	154	178	231	319	158	165	164	182	1	108	103	167	1	0	67	1	178	180	105	1	176	175	2	179	104	165	234	163	204	178	172	147	163	169	183	175	145	268	191	159	262
	37C	231	232	248	249	230	240	276	221	243	298	384	223	231	230	249	66	173	170	234	68	67	0	68	242	244	170	68	242	176	67	245	103	230	299	230	204	177	238	214	229	233	248	240	210	332	256	225	329
	29C	164	167	183	182	163	174	210	155	177	232	320	159	166	165	181	2	109	104	166	2	1	68	0	179	179	106	2	177	174	3	178	105	164	235	162	205	179	171	148	164	170	182	176	146	267	190	158	263
India, MP	68B	143	144	159	156	142	151	235	162	184	257	342	171	143	142	160	177	148	151	139	179	178	242	179	0	10	151	179	2	14	178	11	149	135	210	141	174	153	150	156	141	145	160	151	151	290	202	174	282
India, WB	64C	143	146	159	156	142	151	235	164	184	259	344	173	145	144	160	179	150	153	139	181	180	244	179	10	0	153	181	10	4	180	1	151	135	212	141	176	155	150	158	143	147	160	153	153	290	202	174	284
India, Guj	60D	140	141	157	158	139	147	184	129	151	206	292	132	140	139	157	104	9	6	142	106	105	170	106	151	153	0	106	151	150	105	154	1	138	206	138	179	151	147	123	138	142	157	147	118	240	165	135	238
India, WB	58C	166	167	185	184	165	176	212	155	179	231	320	159	166	165	183	2	109	104	168	0	1	68	2	179	181	106	0	177	176	1	180	105	166	235	164	205	179	173	148	164	170	184	176	146	268	192	160	263
	57D	141	142	159	154	140	151	236	160	184	255	342	171	141	140	158	177	148	149	137	177	176	242	177	2	10	151	177	0	12	178	9	149	135	210	139	172	153	148	154	139	145	160	151	151	290	202	172	280
	56D	138	141	156	155	137	148	233	165	187	254	341	170	140	139	155	176	153	148	140	176	175	176	174	14	4	150	176	12	0	177	3	149	132	209	136	172	153	144	159	138	144	157	150	150	288	199	168	285
	53C	167	168	184	185	166	175	211	156	178	233	319	158	167	166	184	1	108	105	169	1	2	67	3	178	180	105	1	178	177	0	181	104	165	234	165	206	178	174	149	165	169	183	175	145	267	191	161	264
	52C	142	145	160	155	141	152	236	163	185	258	345	174	144	143	159	180	151	152	138	180	179	245	178	11	1	154	180	9	3	181	0	152	136	213	140	175	156	149	157	142	148	161	154	154	291	203	173	283
	23D	138	139	155	156	137	147	183	128	150	205	291	131	138	137	156	103	8	5	141	105	104	103	105	149	151	1	105	149	149	104	152	0	137	205	137	177	150	145	122	136	140	156	146	117	239	164	134	237
	19C	128	131	145	146	127	136	221	155	174	244	329	158	130	129	145	164	141	138	130	166	165	230	164	135	135	138	166	135	132	165	136	137	0	197	126	95	141	135	149	128	132	145	138	137	275	189	159	275
India, Bih	CMC_E36	194	195	211	212	193	203	291	224	246	313	399	227	194	193	212	233	209	206	181	235	234	299	235	210	212	206	235	210	209	234	213	205	197	0	191	236	204	200	218	192	196	212	201	207	347	260	231	344
India, Jhar	CMC_E313	122	125	141	140	121	132	220	153	175	242	329	158	124	123	139	164	141	136	122	164	163	230	162	141	141	138	164	139	136	165	140	137	126	191	0	166	135	127	147	122	128	141	132	138	276	189	157	274
India, WB	CMC_E120B	168	169	187	186	166	178	261	192	217	282	368	199	168	167	186	205	182	177	170	205	204	204	205	174	176	179	205	172	172	206	175	177	95	236	166	0	181	175	187	165	171	188	179	178	318	230	199	313
India, Karn	CMC_E65	138	139	155	156	137	147	235	168	190	257	343	171	138	137	156	177	154	151	139	179	178	177	179	153	155	151	179	153	153	178	156	150	141	204	135	181	0	143	162	136	140	156	67	151	291	204	174	289
India, WB	CMC_E374	131	134	150	149	130	141	228	162	184	251	339	167	133	132	148	173	150	145	131	173	172	238	171	150	150	147	173	148	144	174	149	145	135	200	127	175	143	0	156	131	137	150	141	147	285	198	167	283
Canada	MUHC/MB/EPTB/Orygis/51145	149	150	168	163	148	159	208	89	131	227	314	133	149	148	166	148	120	121	141	148	147	214	148	156	158	123	148	154	159	149	157	122	149	218	147	187	162	156	0	147	153	168	157	129	263	168	101	251
India, Che	NIRTKL276	26	27	47	48	1	70	222	152	177	242	330	158	26	25	75	164	141	136	126	164	163	229	164	141	143	138	164	139	138	165	142	136	128	192	122	165	136	131	147	0	32	78	134	138	278	190	157	272
India, Che	NIRTKL116	34	35	51	54	33	74	227	158	181	248	334	162	34	33	81	168	145	142	132	170	169	233	170	145	147	142	170	145	144	169	148	140	132	196	128	171	140	137	153	32	0	82	138	142	282	194	163	278
India, Che	NIRTKL036	77	81	95	94	77	88	239	174	194	263	344	176	81	77	11	182	160	157	145	184	183	248	182	160	160	157	184	160	157	183	161	156	145	212	141	188	156	150	168	78	82	0	153	157	296	208	179	296
	54C	136	137	153	154	135	144	232	165	187	253	340	169	136	135	153	174	150	147	134	176	175	240	176	151	153	147	176	151	150	175	154	146	138	201	132	179	67	141	157	134	138	153	0	148	288	200	170	284
	117C	140	141	157	158	139	148	201	135	157	224	310	139	140	139	157	144	121	118	142	146	145	210	146	151	153	118	146	151	150	145	154	117	137	207	138	178	151	147	129	138	142	157	148	0	258	171	141	256
Netherlands	RIVM1156	280	281	295	296	277	286	295	269	289	318	406	272	282	279	297	266	243	241	280	268	268	332	267	290	290	240	268	290	288	267	291	239	275	347	276	318	291	285	263	278	282	296	288	258	0	301	275	78
USA	IDR1200003374	190	193	207	208	189	198	248	174	194	271	356	174	192	191	207	190	168	165	193	192	191	256	190	202	202	165	192	202	199	191	203	164	189	260	189	230	204	198	168	190	194	208	200	171	301	0	179	302
USA	IDR1100020842	157	161	176	175	157	168	216	52	146	238	328	145	160	158	176	160	139	134	161	160	159	225	158	174	174	135	160	172	168	161	173	134	159	231	157	199	174	167	101	157	163	179	170	141	275	179	0	274
USA	AFB0800000210	276	275	293	288	273	285	293	259	283	314	403	269	275	273	293	263	235	236	270	263	262	329	263	282	284	238	263	280	285	264	283	237	275	344	274	313	289	283	251	272	278	296	284	256	78	302	274	0
USA	AFB0700001273	242	244	261	256	241	253	263	229	251	284	369	240	243	242	259	233	203	205	239	232	232	299	231	252	252	207	233	250	253	234	251	205	244	314	242	283	258	251	223	242	248	262	256	226	317	271	240	310
USA	IDR1600048632	135	138	154	149	134	145	232	158	180	252	340	167	137	136	152	174	146	147	133	174	173	239	172	141	141	149	174	139	142	175	140	148	133	208	135	173	152	144	152	135	141	155	149	149	285	200	169	279
USA	IDR1600031534	163	164	180	177	161	171	208	145	168	229	314	155	163	162	179	127	78	82	159	129	129	193	130	167	169	81	129	167	173	128	170	80	160	229	161	200	174	170	140	160	165	179	171	141	263	188	158	256
USA	IDR1500005031	115	118	132	133	113	123	212	147	167	235	321	148	117	116	131	155	133	131	118	157	157	221	156	132	132	130	157	132	130	156	133	129	117	183	114	159	128	123	141	114	119	132	125	130	267	181	152	269
USA	IDR1200010128	274	273	291	290	271	282	292	262	286	310	400	266	273	271	291	260	238	233	275	260	259	326	260	285	287	235	260	283	282	261	286	234	271	341	271	309	286	280	256	270	276	294	283	253	75	299	271	73
India, Che	NIRTAH144	8	9	47	48	25	70	223	154	177	244	333	160	10	7	77	166	143	138	126	166	165	231	164	143	143	140	166	141	138	167	142	138	128	194	122	168	138	131	149	26	34	80	136	140	278	190	159	274
[truncated: 6 more columns]
