# Supplementary material for: Whole genome sequencing and comparative genomics of Mycobacterium orygis isolated from different animal hosts to identify specific diagnostic markers
Source: Front Cell Infect Microbiol. 2023 Dec 22;13:1302393. doi: 10.3389/fcimb.2023.1302393 (PMC10770871; doi:10.3389/fcimb.2023.1302393)
Supplement: Supplementary file 1 [file DataSheet_1.xlsx]

## Sheet: MTBC
Metadata of all the MTBC genomes used in this study
Organism	Strain	Biosample	Assembly	Country	Host	Isolation source	Year
Mycobacterium tuberculosis	1458	SAMN04293604	GCA_001855255.1	China	cattle	tissue sample	2008-10-10
Mycobacterium tuberculosis H37Rv	H37Rv	SAMEA3138326	GCA_000195955.2	Unknown	Unknown	Unknown	Unknown
Mycobacterium tuberculosis variant caprae	Allgaeu	SAMN05257278	GCA_001941665.1	Germany	Bos taurus	Unknown	2013
Mycobacterium tuberculosis variant caprae	ATCC BAA-824	SAMN06462279	GCA_002982225.1	Spain: Central Madrid	Capra aegagrus	Lymph node and lung	1996
Mycobacterium tuberculosis variant caprae	NLA000201913	SAMN15753983	GCA_014489215.1	Netherlands	Homo sapiens	sputum	2002
Mycobacterium tuberculosis variant caprae	MB2	SAMEA2794673	GCA_001369315.1	Unknown	Unknown	Unknown	Unknown
Mycobacterium tuberculosis variant pinnipedii	ATCC BAA-688	SAMN06462281	GCA_002982275.1	Australia	Unknown	Unknown	1986
Mycobacterium tuberculosis variant pinnipedii	MP2	SAMN08767991	GCA_003027795.2	Brazil: Rio Grande do Sul	sea lion	Unknown	Unknown
Mycobacterium tuberculosis variant pinnipedii	MP1	SAMN08741620	GCA_003027895.2	Brazil: Rio Grande do Sul	sea lion	Unknown	2011-10
Mycobacterium tuberculosis variant microti OV254	Mycobacterium microti OV254	SAMEA7336314	GCA_904810325.1	United Kingdom	Microtus agrestis	Unknown	1930
Mycobacterium tuberculosis variant microti	Mycobacterium microti Maus IV	SAMEA7336318	GCA_904810355.1	Germany	Homo sapiens	Unknown	1999
Mycobacterium tuberculosis variant microti	Mycobacterium microti 94-2272	SAMEA7336316	GCA_904810365.1	Netherlands	Homo sapiens	Unknown	1988
Mycobacterium tuberculosis variant microti	Mycobacterium microti Maus III	SAMEA7336317	GCA_904810345.1	Germany	Homo sapiens	Unknown	2000
Mycobacterium tuberculosis variant microti	Mycobacterium microti ATCC 35782	SAMEA7336315	GCA_904810335.1	United Kingdom	Microtus agrestis	Unknown	1930
Mycobacterium tuberculosis variant africanum GM041182	GM041182	SAMEA2272165	GCA_000253355.1	Unknown	Unknown	Unknown	Unknown
Mycobacterium tuberculosis variant africanum	UT307	SAMN04479830	GCA_001593225.1	Colombia: Medellin	Homo sapiens	sputum	2006-05-01
Mycobacterium tuberculosis variant africanum	Various	SAMEA104679304	GCA_905183025.1	France	Homo sapiens	Unknown	2007
Mycobacterium tuberculosis variant africanum	Various	SAMEA104679305	GCA_905183075.1	France	Homo sapiens	Unknown	2007
Mycobacterium tuberculosis variant bovis	Danish 1331	SAMN10219708	GCA_005156105.1	Belgium: Ghent	Unknown	Unknown	2016
Mycobacterium tuberculosis variant bovis	BCG-1 (Russia)	SAMN04364424	GCA_001483905.1	Russia: Moscow	Unknown	Unknown	2014
Mycobacterium tuberculosis variant bovis	Mb3601	SAMEA5803801	GCA_902459825.2	France	Bovine	Unknown	2014
Mycobacterium tuberculosis variant bovis	2002/0476	SAMN08321034	GCA_002975475.1	Canada:ON	Bos taurus	Unknown	2002
Mycobacterium tuberculosis variant bovis	1595	SAMN03761171	GCA_001078615.1	Korea	Cattle	Unknown	2012
Mycobacterium tuberculosis variant bovis	SP38	SAMN03288261	GCA_000934325.3	Brazil: Sao Paulo	Bovine	Unknown	2010
Mycobacterium tuberculosis variant bovis	Danish delta-sapM	SAMN10219709	GCA_005155785.1	Belgium: Ghent	Unknown	Unknown	2016
Mycobacterium tuberculosis variant bovis BCG	3281	SAMN02864173	GCA_001043255.1	China	Homo sapiens	Unknown	2012-06
Mycobacterium tuberculosis variant bovis BCG	BCG SL 222 Sofia	SAMN16605479	GCA_015482805.1	Bulgaria: Sofia	Unknown	Unknown	1972
Mycobacterium tuberculosis variant bovis BCG	Russia 368	SAMN02940916	GCA_001274555.1	Russia: Moscow	Unknown	Unknown	2006-08-16
Mycobacterium tuberculosis variant bovis BCG str. Pasteur 1173P2	BCG Pasteur 1173P2	SAMEA2272684	GCA_000009445.1	Unknown	Unknown	Unknown	Unknown
Mycobacterium tuberculosis variant bovis BCG str. Tokyo 172	Tokyo 172	SAMD00060950	GCA_000010685.1	Unknown	Unknown	Unknown	Unknown
Mycobacterium tuberculosis variant bovis BCG str. Tokyo 172	Tokyo 172	SAMN04517448	GCA_001580385.1	Thailand	Homo sapiens	Unknown	1988
Mycobacterium tuberculosis variant bovis AF2122/97	AF2122/97	SAMEA20450668	GCA_000195835.3	United Kingdom	Bos taurus	lung and bronchomediastinal lymph nodes	1997
Mycobacterium tuberculosis variant bovis BCG str. Moreau RDJ	Moreau RDJ	SAMEA4532327	GCA_000967285.1	Unknown	Unknown	Unknown	Unknown
Mycobacterium tuberculosis variant bovis BCG str. Korea 1168P	Korea 1168P	SAMN02603488	GCA_000338715.2	Unknown	Unknown	Unknown	Unknown
Mycobacterium tuberculosis variant bovis BCG str. Mexico	Mexico	SAMN02604104	GCA_000234725.1	Mexico	Unknown	Unknown	Unknown
Mycobacterium tuberculosis variant bovis	BCG-1	SAMN03658568	GCA_001293105.1	Russia: Moscow	Unknown	Unknown	2006
Mycobacterium tuberculosis variant bovis	1	SAMN11954087	GCA_008033095.1	Brazil: Goiania	Tapirus terrestris	lung	2015-11-10
Mycobacterium tuberculosis variant bovis	3/86Rv	SAMN07709478	GCA_002504245.2	India:Uttar Pradesh	Cattle	Mediastinal lymph node	1986-07-05
Mycobacterium tuberculosis variant bovis BCG	BCG-S48	SAMN10279424	GCA_003703995.1	South Africa: Pretoria	Homo sapiens	Superficial Abscess	2015-09-29
Mycobacterium tuberculosis variant bovis BCG	BCG_S49	SAMN10278076	GCA_003704015.1	South Africa	Homo sapiens	superficial swab	2014-08-05

## Sheet: M. orygis
Metadata of M. orygis genome used in theis study (both NCBI and isolates from this study)
Organism	Strain	Biosample	Bioproject	SRA	Read	Accession	GenBank Assembly	Country	Host	Isolation source	Year
	68B	SAMN13000338	PRJNA576656	SRS5494768	SRR10251193	SRX6969201		India: Madhya Pradesh	Bos gaurus	lymph node	2017-02-13
	64C	SAMN13000337	PRJNA576656	SRS5494767	SRR10251194	SRX6969200		India: West Bengal	Bos taurus	lung	2016-08-31
	MUHC/MB/EPTB/Orygis/51145	SAMN16564840	PRJNA672657	SRS7601333	SRR16643349	SRX12844055		Canada: Quebec	Homo sapiens	Cerebospinal fluid	1997-09-23
	60D	SAMN13000336	PRJNA576656	SRS5494766	SRR10251195	SRX6969199		India: Gujarat	Deer	lung	2016-02-07
	58C	SAMN13000334	PRJNA576656	SRS5494764	SRR10251197	SRX6969197		India: West Bengal	Bos taurus	lung	2015-06-20
	57D	SAMN13000333	PRJNA576656	SRS5494763	SRR10251198	SRX6969196		India: West Bengal	Deer	lung	2015-03-14
	56D	SAMN13000332	PRJNA576656	SRS5494762	SRR10251199	SRX6969195		India: West Bengal	Deer	lung	2015-02-16
	53C	SAMN13000331	PRJNA576656	SRS5494761	SRR10251200	SRX6969194		India: Kolkata	Bos taurus	lung	2014-01-13
	52C	SAMN13000330	PRJNA576656	SRS5494760	SRR10251201	SRX6969193		India: Kolkata	Bos taurus	lung	2013-12-28
	51C	SAMN13000329	PRJNA576656	SRS5494776	SRR10251185	SRX6969209		India: Kolkata	Bos taurus	lung	2013-12-28
	48C	SAMN13000328	PRJNA576656	SRS5494775	SRR10251186	SRX6969208		India: Kolkata	Bos taurus	lung	2013-11-18
	45C	SAMN13000327	PRJNA576656	SRS5494774	SRR10251187	SRX6969207		India: Kolkata	Bos taurus	lung	2013-11-18
	43C	SAMN13000326	PRJNA576656	SRS5494773	SRR10251188	SRX6969206		India: Kolkata	Bos taurus	lung	2013-11-12
	41C	SAMN13000325	PRJNA576656	SRS5494772	SRR10251189	SRX6969205		India: Kolkata	Bos taurus	lung	2013-11-11
	40C	SAMN13000324	PRJNA576656	SRS5494771	SRR10251190	SRX6969204		India: Kolkata	Bos taurus	lung	2013-10-28
	37C	SAMN13000323	PRJNA576656	SRS5494770	SRR10251191	SRX6969203		India: Kolkata	Bos taurus	lung	2013-02-16
	29C	SAMN13000322	PRJNA576656	SRS5494769	SRR10251192	SRX6969202		India: Kolkata	Bos taurus	lung	2013-08-23
	23D	SAMN13000321	PRJNA576656	SRS5494759	SRR10251202	SRX6969192		India: West Bengal	Deer	lung	2013-04-17
	19C	SAMN13000320	PRJNA576656	SRS5494758	SRR10251203	SRX6969191		India: Kolkata	Bos taurus	lung	2013-05-13
	539861	SAMEA8113340	PRJEB43202	ERS5800328	ERR5336157	ERX5124545		Norway	Homo sapiens	lung	2016-05-19
	565181	SAMEA8113342	PRJEB43202	ERS5800330	ERR5336162	ERX5124550		Norway	Homo sapiens	lung	2017-01-18
	550182	SAMEA8113339	PRJEB43202	ERS5800327	ERR5336161	ERX5124549		Norway	Homo sapiens	collum biopsy	2016-07-04
	543229	SAMEA8113341	PRJEB43202	ERS5800329	ERR5336158	ERX5124546		Norway	Homo sapiens	lung	2016-08-16
	605088	SAMEA8113338	PRJEB43202	ERS5800326	ERR5336167	ERX5124555		Norway	Homo sapiens	bone biopsy	2017-08-31
	CMC_E36	SAMN13071981	PRJNA575883	SRS5552133	SRR10321128	SRX7032024		India: Bihar	Homo sapiens	lymph node	2018-07-24
	CMC_E313	SAMN13071979	PRJNA575883	SRS5552131	SRR10321130	SRX7032022		India: Jharkhand	Homo sapiens	bone	2019-01-24
	CMC_E120B	SAMN13071974	PRJNA575883	SRS5552120	SRR10321141	SRX7032011		India: West Bengal	Homo sapiens	lymph node	2018-09-20
	CMC_E65	SAMN13071990	PRJNA575883	SRS5552118	SRR10321143	SRX7032009		India: Karnataka	Homo sapiens	Fluid	2018-08-03
	CMC_E374	SAMN13071984	PRJNA575883	SRS5552112	SRR10321149	SRX7032003		India: West Bengal	Homo sapiens	Psoas abscess	2019-03-20
	IDR1200003374	SAMN07190147	PRJNA389109	SRS2249023	SRR5642711	SRX2880899		USA: New York	Unknown	Unknown	2011-11-09
	IDR1100020842	SAMN07190148	PRJNA389109	SRS2249022	SRR5642712	SRX2880898		USA: Rockville Centre	Unknown	sputum	2011-07-17
	AFB0800000210	SAMN07190149	PRJNA389109	SRS2249021	SRR5642713	SRX2880897		USA: New York	Unknown	sputum	2008-01-30
	AFB0700001273	SAMN07190150	PRJNA389109	SRS2249020	SRR5642714	SRX2880896		USA: Lake Success	Unknown	gluteal abscess	2007-03-20
	IDR1600048632	SAMN07190143	PRJNA389109	SRS2249019	SRR5642715	SRX2880895		USA: Stony Brook	Unknown	right axillary lymph node	2016-09-16
	IDR1600031534	SAMN07190144	PRJNA389109	SRS2249018	SRR5642716	SRX2880894		USA: New Hyde Park	Unknown	skin tissue	2016-05-18
	IDR1500005031	SAMN07190145	PRJNA389109	SRS2249017	SRR5642717	SRX2880893		USA: Denver	Unknown	bronchial wash	2015-01-09
	IDR1200010128	SAMN07190146	PRJNA389109	SRS2249016	SRR5642718	SRX2880892		USA: Jacksonville	Unknown	sputum	2011-12-13
	NIRTAH144	SAMN11890852	PRJNA545406	SRS4844114	SRR9157804	SRX5930882	GCA_006385035.1	India: Chennai	Bos taurus	lung	2016-12-08
	RIVM1156	SAMN30949871	PRJNA882748	SRS15220083	SRR21691066	SRX17688695		Netherlands	Homo sapiens		2017
	117C	SAMN29934961	PRJNA576656	SRS14280234	SRR20622096	SRX16645842		India	Bos taurus	Lung	2019-04-03
	115(1)C	SAMN29934960	PRJNA576656	SRS14280233	SRR20622097	SRX16645841		India	Bos taurus	liver	2019-04-01
	54C	SAMN29932820	PRJNA576656	SRS14266089	SRR20607504	SRX16631283		India	Bos taurus	Lung	2014-01-13
	NIRTKL276	SAMN24147877	PRJNA789714	SRS11333394	SRR17254975	SRX13433863		India:Chennai	Antelope Cervicapra	lymph node	2021-03-28
	NIRTKL116	SAMN24147876	PRJNA789714	SRS11333393	SRR17254976	SRX13433862		India:Chennai	Antelope Cervicapra	lymph node	2021-03-27
	NIRTKL036	SAMN24147875	PRJNA789714	SRS11333392	SRR17254977	SRX13433861		India:Chennai	Axis axis	lung	2020-03-25
S. No.	Sample ID	Strain ID	Place of isolation	Host	Tissue	Date of sample collection	Isolate
1	C1a	TANUVAS_1	Chennai, Tamil Nadu	Cattle	Lung tissue	03.03.2020	M.orygis
2	1046	TANUVAS_2	Chengalpattu, Tamil Nadu	Cattle	Lung tissue	10.03.2021	M.orygis
3	JX25	TANUVAS_4	Chengalpattu, Tamil Nadu	Cattle	Lung tissue	02.04.2021	M.orygis
4	1137	TANUVAS_5	Chengalpattu, Tamil Nadu	Cattle	Lung tissue	24.07.2021	M.orygis
5	SD	TANUVAS_6	Chennai, Tamil Nadu	Spotted Deer	Lung tissue	06.12.2021	M.orygis
6	M44	TANUVAS_7	Chengalpattu, Tamil Nadu	Buffalo	Mesentric LN	03.12.2021	M.orygis
7	Deer 1	TANUVAS_8	Chennai, Tamil Nadu	Spotted Deer	Lung tissue	19.09.2019	M.orygis
8	154	TANUVAS_9	Chennai, Tamil Nadu	Sambar Deer	Lung tissue	13.10.2021	M.orygis
9	155	TANUVAS_10	Chennai, Tamil Nadu	Sambar Deer	Lung tissue	13.10.2021	M.orygis
10	HB	TANUVAS_11	Hisar, Haryana	Buffalo	Broncheolar LN	04.08.2021	M.orygis
