# Supplementary material for: Whole genome sequencing and comparative genomics of Mycobacterium orygis isolated from different animal hosts to identify specific diagnostic markers
Source: Front Cell Infect Microbiol. 2023 Dec 22;13:1302393. doi: 10.3389/fcimb.2023.1302393 (PMC10770871; doi:10.3389/fcimb.2023.1302393)
Supplement: Supplementary Table 4 — Spoliogotyping results of the M. orygis genomes. [file DataSheet_4.xlsx]

## Sheet: Sheet1
Read	Strain	Binary	Octal
SRR10251193	68B	1100000001 1110000000 0000111111 1101001101 111	600740007764671
SRR10251194	64C	1100000001 1110000000 0000111111 1101001101 111	600740007764671
SRR16643349	MUHC/MB/EPTB/Orygis/51145	1100000000 0000000000 0000000000 0000000101 111	600000000000271
SRR10251195	60D	1100000001 1110000000 0000111000 1111001101 111	600740007074671
SRR10251197	58C	1100000001 1110000000 0000111111 1101001101 111	600740007764671
SRR10251198	57D	1100000001 1110000000 0000111111 1101001101 111	600740007764671
SRR10251199	56D	1100000001 1110000000 0000111111 1101001101 111	600740007764671
SRR10251200	53C	1100000001 1110000000 0000111111 1101001101 111	600740007764671
SRR10251201	52C	1100000001 1110000000 0000111111 1101001101 111	600740007764671
SRR10251185	51C	1100000001 1110000000 0000111111 1111001101 111	600740007774671
SRR10251186	48C	1100000001 1110000000 0000111000 1111001101 111	600740007074671
SRR10251187	45C	1100000001 1110000000 0000111000 1111001101 111	600740007074671
SRR10251188	43C	1100000001 1110000000 0000011000 0000000001 111	600740003000071
SRR10251189	41C	1100000001 1110000000 0000111111 1111001101 111	600740007774671
SRR10251190	40C	1100000001 1110000000 0000111111 1111001101 111	600740007774671
SRR10251191	37C	1100000001 1110000000 0000111111 1111001101 111	600740007774671
SRR10251192	29C	1100000001 1110000000 0000111111 1111001101 111	600740007774671
SRR10251202	23D	1100000001 1110000000 0000111000 1111001101 111	600740007074671
SRR10251203	19C	1100000001 1110000000 0000111000 1111001101 111	600740007074671
ERR5336157	539861	1100000001 1110000000 0000111111 1111001101 111	600740007774671
ERR5336162	565181	1000000001 1100000000 0000111111 1111001101 111	400700007774671
ERR5336161	550182	1100000001 1110000000 0000111111 1111001101 111	600740007774671
ERR5336158	543229	1100000001 1110000000 0000111111 1111001101 111	600740007774671
ERR5336167	605088	1100000001 1110000000 0000111111 1111001101 111	600740007774671
SRR10321128	CMC_E36	1100000001 1110000000 0000111111 1111001101 111	600740007774671
SRR10321130	CMC_E313	1100000001 1110000000 0000111111 1111001101 111	600740007774671
SRR10321141	CMC_E120B	1100000001 1110000000 0000111111 1111001101 111	600740007774671
SRR10321143	CMC_E65	1100000001 1110000000 0000111111 1111001101 111	600740007774671
SRR10321149	CMC_E374	1100000001 1110000000 0000111111 1111001101 111	600740007774671
SRR5642711	IDR1200003374	1100000001 1110000000 0000111111 1111001101 111	600740007774671
SRR5642712	IDR1100020842	1100000001 1110000000 0000111111 1111001101 111	600740007774671
SRR5642713	AFB0800000210	1100000001 1110000000 0000111111 1111001101 111	600740007774671
SRR5642714	AFB0700001273	1100000001 1110000000 0000111111 1111001101 111	600740007774671
SRR5642715	IDR1600048632	1100000001 1110000000 0000111111 1110001101 111	600740007770671
SRR5642716	IDR1600031534	1100000001 1110000000 0000111111 1111001101 111	600740007774671
SRR5642717	IDR1500005031	1100000001 1110000000 0000111111 1111001101 111	600740007774671
SRR5642718	IDR1200010128	1100000001 1110000000 0000111111 1111001101 111	600740007774671
SRR9157804	NIRTAH144	1100000001 1110000000 0000111111 1111001101 111	600740007774671
SRR21691066	RIVM1156	1100000001 1110000000 0000111111 1111001101 111	600740007774671
SRR20622096	117C	1100000001 1110000000 0000111111 1111001101 111	600740007774671
SRR20622097	115(1)C	1100000001 1110000000 0000111111 1111001101 111	600740007774671
SRR20607504	54C	1100000001 1110000000 0000111111 1111001101 111	600740007774671
SRR17254975	NIRTKL276	1100000001 1110000000 0000111111 1111001101 111	600740007774671
SRR17254976	NIRTKL116	1100000001 1110000000 0000111111 1111001101 111	600740007774671
SRR17254977	NIRTKL036	1100000001 1110000000 0000111111 1111001101 111	600740007774671
C1a	TANUVAS_1	1100000001 1110000000 0000111111 1111001101 111	600740007774671
1046	TANUVAS_2	1100000001 1110000000 0000111111 1111001101 111	600740007774671
JX25	TANUVAS_4	1100000001 1110000000 0000111111 1111001101 111	600740007774671
1137	TANUVAS_5	1100000001 1110000000 0000111111 1111001101 111	600740007774671
SD	TANUVAS_6	1100000001 1110000000 0000111111 1111001101 111	600740007774671
M44	TANUVAS_7	1100000001 1110000000 0000111111 1111001101 111	600740007774671
Deer 1	TANUVAS_8	1100000001 1110000000 0000111111 1111001101 111	600740007774671
154	TANUVAS_9	1100000001 1110000000 0000111111 1111001101 111	600740007774671
155	TANUVAS_10	1100000001 1110000000 0000111111 1111001101 111	600740007774671
