# Supplementary material for: Whole genome sequencing and comparative genomics of Mycobacterium orygis isolated from different animal hosts to identify specific diagnostic markers
Source: Front Cell Infect Microbiol. 2023 Dec 22;13:1302393. doi: 10.3389/fcimb.2023.1302393 (PMC10770871; doi:10.3389/fcimb.2023.1302393)
Supplement: Supplementary Table 5 — COG categorization of functional genes that possess missense mutation. [file DataSheet_5.xlsx]

## Sheet: COG based 
query	seed_ortholog	evalue	score	eggNOG_OGs	max_annot_lvl	COG_category	Description	Preferred_name	GOs	EC	KEGG_ko	KEGG_Pathway	KEGG_Module	KEGG_Reaction	KEGG_rclass	BRITE	KEGG_TC	CAZy	BiGG_Reaction	PFAMs
lcl|NC_009525.1_cds_WP_003400253.1_1	419947.MRA_0001	0.0	948.0	COG0593@1|root,COG0593@2|Bacteria,2GJKI@201174|Actinobacteria,232TF@1762|Mycobacteriaceae	201174|Actinobacteria	L	it binds specifically double-stranded DNA at a 9 bp consensus (dnaA box) 5'-TTATC CA A CA A-3'. DnaA binds to ATP and to acidic phospholipids	dnaA	GO:0000166,GO:0003674,GO:0003676,GO:0003677,GO:0003688,GO:0003690,GO:0003824,GO:0005488,GO:0005524,GO:0005575,GO:0005618,GO:0005622,GO:0005623,GO:0005737,GO:0005886,GO:0006139,GO:0006163,GO:0006164,GO:0006172,GO:0006259,GO:0006260,GO:0006261,GO:0006270,GO:0006725,GO:0006753,GO:0006793,GO:0006796,GO:0006807,GO:0008144,GO:0008150,GO:0008152,GO:0009058,GO:0009059,GO:0009117,GO:0009123,GO:0009124,GO:…	-	ko:K02313	ko02020,ko04112,map02020,map04112	-	-	-	ko00000,ko00001,ko03032,ko03036	-	-	-	Bac_DnaA,Bac_DnaA_C
lcl|NC_009525.1_cds_WP_003400271.1_2	419947.MRA_0002	4.68e-280	766.0	COG0592@1|root,COG0592@2|Bacteria,2GJK3@201174|Actinobacteria,235PH@1762|Mycobacteriaceae	201174|Actinobacteria	L	Confers DNA tethering and processivity to DNA polymerases and other proteins. Acts as a clamp, forming a ring around DNA (a reaction catalyzed by the clamp-loading complex) which diffuses in an ATP-independent manner freely and bidirectionally along dsDNA. Initially characterized for its ability to contact the catalytic subunit of DNA polymerase III (Pol III), a complex, multichain enzyme respons…	dnaN	GO:0005575,GO:0005576,GO:0005618,GO:0005623,GO:0030312,GO:0044464,GO:0071944	2.7.7.7	ko:K02338	ko00230,ko00240,ko01100,ko03030,ko03430,ko03440,map00230,map00240,map01100,map03030,map03430,map03440	M00260	R00375,R00376,R00377,R00378	RC02795	ko00000,ko00001,ko00002,ko01000,ko03032,ko03400	-	-	-	DNA_pol3_beta,DNA_pol3_beta_2,DNA_pol3_beta_3
lcl|NC_009525.1_cds_WP_003912365.1_3	419947.MRA_0003	3e-272	745.0	COG1195@1|root,COG1195@2|Bacteria,2GJCS@201174|Actinobacteria,233RS@1762|Mycobacteriaceae	201174|Actinobacteria	L	it is required for DNA replication and normal SOS inducibility. RecF binds preferentially to single-stranded, linear DNA. It also seems to bind ATP	recF	GO:0000731,GO:0005575,GO:0005622,GO:0005623,GO:0005737,GO:0005829,GO:0005886,GO:0006139,GO:0006259,GO:0006281,GO:0006302,GO:0006725,GO:0006807,GO:0006950,GO:0006974,GO:0008150,GO:0008152,GO:0009058,GO:0009059,GO:0009987,GO:0016020,GO:0018130,GO:0019438,GO:0033554,GO:0034641,GO:0034645,GO:0034654,GO:0043170,GO:0044237,GO:0044238,GO:0044249,GO:0044260,GO:0044271,GO:0044424,GO:0044444,GO:0044464,GO:…	-	ko:K03629	ko03440,map03440	-	-	-	ko00000,ko00001,ko03400	-	-	-	SMC_N
lcl|NC_009525.1_cds_WP_003899769.1_4	419947.MRA_0004	1.13e-127	363.0	COG5512@1|root,COG5512@2|Bacteria,2GNQ4@201174|Actinobacteria,232VD@1762|Mycobacteriaceae	201174|Actinobacteria	S	Belongs to the UPF0232 family	-	-	-	-	-	-	-	-	-	-	-	-	DUF721
lcl|NC_009525.1_cds_WP_003917863.1_5	419947.MRA_0005	0.0	1302.0	COG0187@1|root,COG0187@2|Bacteria,2GKGP@201174|Actinobacteria,235GQ@1762|Mycobacteriaceae	201174|Actinobacteria	L	A type II topoisomerase that negatively supercoils closed circular double-stranded (ds) DNA in an ATP-dependent manner to modulate DNA topology and maintain chromosomes in an underwound state. Negative supercoiling favors strand separation, and DNA replication, transcription, recombination and repair, all of which involve strand separation. Also able to catalyze the interconversion of other topol…	gyrB	GO:0000166,GO:0000287,GO:0003674,GO:0003824,GO:0003916,GO:0003918,GO:0005488,GO:0005524,GO:0005575,GO:0005618,GO:0005623,GO:0005886,GO:0006139,GO:0006259,GO:0006265,GO:0006725,GO:0006807,GO:0006996,GO:0007059,GO:0008094,GO:0008144,GO:0008150,GO:0008152,GO:0009295,GO:0009987,GO:0016020,GO:0016043,GO:0016462,GO:0016787,GO:0016817,GO:0016818,GO:0016853,GO:0016887,GO:0017076,GO:0017111,GO:0030312,GO:…	5.99.1.3	ko:K02470	-	-	-	-	ko00000,ko01000,ko03032,ko03400	-	-	-	DNA_gyraseB,DNA_gyraseB_C,HATPase_c,Toprim
lcl|NC_009525.1_cds_WP_003917265.1_6	419947.MRA_0006	0.0	1614.0	COG0188@1|root,COG0188@2|Bacteria,2GJ2Q@201174|Actinobacteria,233TD@1762|Mycobacteriaceae	201174|Actinobacteria	L	A type II topoisomerase that negatively supercoils closed circular double-stranded (ds) DNA in an ATP-dependent manner to modulate DNA topology and maintain chromosomes in an underwound state. Negative supercoiling favors strand separation, and DNA replication, transcription, recombination and repair, all of which involve strand separation. Also able to catalyze the interconversion of other topol…	gyrA	GO:0000166,GO:0000287,GO:0003674,GO:0003824,GO:0003916,GO:0003918,GO:0005488,GO:0005524,GO:0005575,GO:0005618,GO:0005623,GO:0005886,GO:0006139,GO:0006259,GO:0006265,GO:0006725,GO:0006807,GO:0006996,GO:0008094,GO:0008144,GO:0008150,GO:0008152,GO:0009987,GO:0016020,GO:0016043,GO:0016462,GO:0016787,GO:0016817,GO:0016818,GO:0016853,GO:0016887,GO:0017076,GO:0017111,GO:0030312,GO:0030554,GO:0032553,GO:…	5.99.1.3	ko:K02469	-	-	-	-	ko00000,ko01000,ko03032,ko03400	-	-	-	DNA_gyraseA_C,DNA_topoisoIV,Intein_splicing,LAGLIDADG_3
lcl|NC_009525.1_cds_WP_003400291.1_7	419947.MRA_0007	3.55e-205	569.0	COG3266@1|root,COG3266@2|Bacteria,2GKZP@201174|Actinobacteria,233QT@1762|Mycobacteriaceae	201174|Actinobacteria	S	Transmembrane domain of unknown function (DUF3566)	-	GO:0005575,GO:0005618,GO:0005623,GO:0005886,GO:0005887,GO:0016020,GO:0016021,GO:0030312,GO:0031224,GO:0031226,GO:0044425,GO:0044459,GO:0044464,GO:0071944	-	-	-	-	-	-	-	-	-	-	DUF3566
lcl|NC_009525.1_cds_WP_003917266.1_10	419947.MRA_0008	2.63e-83	248.0	29YDV@1|root,30K8D@2|Bacteria,2IIBC@201174|Actinobacteria,239NU@1762|Mycobacteriaceae	201174|Actinobacteria	D	Required for regulated cell division, cell wall synthesis and the maintenance of cell shape	cwsA	GO:0005575,GO:0005623,GO:0005886,GO:0005887,GO:0008104,GO:0008150,GO:0016020,GO:0016021,GO:0031224,GO:0031226,GO:0033036,GO:0044425,GO:0044459,GO:0044464,GO:0051179,GO:0071944	-	-	-	-	-	-	-	-	-	-	CwsA
lcl|NC_009525.1_cds_WP_003400321.1_11	419947.MRA_0009	9.75e-131	370.0	COG0652@1|root,COG0652@2|Bacteria,2IFUE@201174|Actinobacteria,234W3@1762|Mycobacteriaceae	201174|Actinobacteria	O	PPIases accelerate the folding of proteins. It catalyzes the cis-trans isomerization of proline imidic peptide bonds in oligopeptides	ppiA	GO:0000413,GO:0003674,GO:0003755,GO:0003824,GO:0005575,GO:0005576,GO:0005618,GO:0005622,GO:0005623,GO:0005737,GO:0005829,GO:0005886,GO:0006464,GO:0006807,GO:0008150,GO:0008152,GO:0009987,GO:0010035,GO:0010038,GO:0010039,GO:0016020,GO:0016853,GO:0016859,GO:0018193,GO:0018208,GO:0019538,GO:0030312,GO:0036211,GO:0042221,GO:0043170,GO:0043412,GO:0044237,GO:0044238,GO:0044260,GO:0044267,GO:0044424,GO:…	5.2.1.8	ko:K03767,ko:K03768	ko01503,ko04217,map01503,map04217	-	-	-	ko00000,ko00001,ko01000,ko03110,ko04147	-	-	-	Pro_isomerase
lcl|NC_009525.1_cds_WP_003899772.1_12	419947.MRA_0010	1.44e-94	276.0	2ESQF@1|root,33K8W@2|Bacteria,2GRJ0@201174|Actinobacteria,239BR@1762|Mycobacteriaceae	201174|Actinobacteria	S	Bacterial PH domain	-	-	-	-	-	-	-	-	-	-	-	-	bPH_6
lcl|NC_009525.1_cds_WP_003917864.1_15	419947.MRA_0014	1.75e-171	479.0	COG3879@1|root,COG3879@2|Bacteria,2GJ9Y@201174|Actinobacteria,233AR@1762|Mycobacteriaceae	201174|Actinobacteria	S	Bacterial protein of unknown function (DUF881)	-	-	-	-	-	-	-	-	-	-	-	-	DUF881
lcl|NC_009525.1_cds_WP_003899773.1_16	419947.MRA_0015	2.4e-167	467.0	COG0512@1|root,COG0512@2|Bacteria,2GJUX@201174|Actinobacteria,234HI@1762|Mycobacteriaceae	201174|Actinobacteria	EH	Anthranilate synthase	trpG	GO:0000162,GO:0005575,GO:0005622,GO:0005623,GO:0005737,GO:0005886,GO:0005950,GO:0006082,GO:0006520,GO:0006568,GO:0006576,GO:0006586,GO:0006725,GO:0006807,GO:0008150,GO:0008152,GO:0008652,GO:0009058,GO:0009072,GO:0009073,GO:0009308,GO:0009309,GO:0009987,GO:0016020,GO:0016053,GO:0018130,GO:0019438,GO:0019752,GO:0032991,GO:0034641,GO:0042401,GO:0042430,GO:0042435,GO:0043436,GO:0044106,GO:0044237,GO:…	2.6.1.85,4.1.3.27	ko:K01658,ko:K01664	ko00400,ko00405,ko00790,ko01100,ko01110,ko01130,ko01230,ko02024,ko02025,map00400,map00405,map00790,map01100,map01110,map01130,map01230,map02024,map02025	M00023	R00985,R00986,R01716	RC00010,RC01418,RC02148,RC02414	ko00000,ko00001,ko00002,ko01000	-	-	-	GATase
lcl|NC_009525.1_cds_WP_003400356.1_17	419947.MRA_0016	0.0	1211.0	COG0515@1|root,COG2815@1|root,COG0515@2|Bacteria,COG2815@2|Bacteria,2GJ1J@201174|Actinobacteria,233BZ@1762|Mycobacteriaceae	201174|Actinobacteria	KLT	serine threonine protein kinase	pknB	GO:0000270,GO:0003674,GO:0003824,GO:0004672,GO:0004674,GO:0005488,GO:0005515,GO:0005575,GO:0005618,GO:0005623,GO:0006022,GO:0006023,GO:0006024,GO:0006464,GO:0006468,GO:0006793,GO:0006796,GO:0006807,GO:0008047,GO:0008150,GO:0008152,GO:0008360,GO:0009058,GO:0009059,GO:0009252,GO:0009273,GO:0009605,GO:0009607,GO:0009889,GO:0009890,GO:0009892,GO:0009987,GO:0010565,GO:0010698,GO:0016301,GO:0016310,GO:…	2.7.11.1	ko:K08884,ko:K12132	-	-	-	-	ko00000,ko01000,ko01001	-	-	-	PASTA,Pkinase
lcl|NC_009525.1_cds_WP_003899775.1_19	419947.MRA_0018	0.0	947.0	COG0768@1|root,COG0768@2|Bacteria,2GJUQ@201174|Actinobacteria,235TI@1762|Mycobacteriaceae	201174|Actinobacteria	M	penicillin-binding protein	pbpA	GO:0005575,GO:0005622,GO:0005623,GO:0005737,GO:0005829,GO:0044424,GO:0044444,GO:0044464	-	ko:K05364	ko00550,map00550	-	R04519	RC00005,RC00049	ko00000,ko00001,ko01011	-	-	-	Transpeptidase
lcl|NC_009525.1_cds_WP_003400364.1_20	419947.MRA_0019	0.0	896.0	COG0772@1|root,COG0772@2|Bacteria,2GJTI@201174|Actinobacteria,232FE@1762|Mycobacteriaceae	201174|Actinobacteria	D	Belongs to the SEDS family	rodA	GO:0002682,GO:0002684,GO:0008150,GO:0009605,GO:0009607,GO:0009987,GO:0035821,GO:0043207,GO:0044003,GO:0044403,GO:0044419,GO:0048518,GO:0048583,GO:0048584,GO:0050776,GO:0050778,GO:0050789,GO:0050896,GO:0051301,GO:0051701,GO:0051704,GO:0051707,GO:0051817,GO:0052031,GO:0052173,GO:0052200,GO:0052255,GO:0052552,GO:0052553,GO:0052555,GO:0052556,GO:0052564,GO:0052572,GO:0065007,GO:0075136	-	ko:K03588	ko04112,map04112	-	-	-	ko00000,ko00001,ko02000,ko03036	2.A.103.1	-	-	FTSW_RODA_SPOVE
lcl|NC_009525.1_cds_WP_003912367.1_21	419947.MRA_0020	0.0	915.0	COG0631@1|root,COG3266@1|root,COG0631@2|Bacteria,COG3266@2|Bacteria,2GJ3M@201174|Actinobacteria,2341C@1762|Mycobacteriaceae	201174|Actinobacteria	T	PFAM Protein phosphatase 2C	pstP	GO:0000287,GO:0001932,GO:0001933,GO:0003674,GO:0003824,GO:0004647,GO:0004721,GO:0005488,GO:0005575,GO:0005618,GO:0005623,GO:0005886,GO:0005887,GO:0006464,GO:0006469,GO:0006470,GO:0006793,GO:0006796,GO:0006807,GO:0008150,GO:0008152,GO:0009892,GO:0009987,GO:0010563,GO:0010605,GO:0016020,GO:0016021,GO:0016311,GO:0016787,GO:0016788,GO:0016791,GO:0019220,GO:0019222,GO:0019538,GO:0030145,GO:0030312,GO:…	3.1.3.16	ko:K20074	-	-	-	-	ko00000,ko01000,ko01009	-	-	-	PP2C,PP2C_2
lcl|NC_009525.1_cds_WP_003912368.1_23	419947.MRA_0022	1.77e-313	862.0	COG1716@1|root,COG1716@2|Bacteria,2GNU2@201174|Actinobacteria,234GB@1762|Mycobacteriaceae	201174|Actinobacteria	T	Fha domain	fhaA	GO:0003674,GO:0003676,GO:0003723,GO:0003729,GO:0005488,GO:0005575,GO:0005618,GO:0005622,GO:0005623,GO:0005737,GO:0005829,GO:0030312,GO:0044424,GO:0044444,GO:0044464,GO:0071944,GO:0097159,GO:1901363	-	-	-	-	-	-	-	-	-	-	DUF3662,FHA,Yop-YscD_cpl
lcl|NC_009525.1_cds_WP_003899778.1_24	419947.MRA_0023	1.04e-222	615.0	COG2070@1|root,COG2070@2|Bacteria,2GKA6@201174|Actinobacteria,235GN@1762|Mycobacteriaceae	201174|Actinobacteria	S	2-nitropropane dioxygenase	-	GO:0000166,GO:0001775,GO:0002252,GO:0002263,GO:0002274,GO:0002275,GO:0002283,GO:0002366,GO:0002376,GO:0002443,GO:0002444,GO:0002446,GO:0003674,GO:0003824,GO:0003938,GO:0005488,GO:0005575,GO:0005576,GO:0005622,GO:0005623,GO:0005634,GO:0005737,GO:0005829,GO:0006139,GO:0006163,GO:0006164,GO:0006183,GO:0006725,GO:0006753,GO:0006793,GO:0006796,GO:0006807,GO:0006810,GO:0006887,GO:0006955,GO:0007623,GO:…	1.13.12.16	ko:K00459	ko00910,map00910	-	R00025	RC02541,RC02759	ko00000,ko00001,ko01000	-	-	-	NMO
lcl|NC_009525.1_cds_WP_003400388.1_25	419947.MRA_0025	1.91e-98	285.0	2AU18@1|root,31JMD@2|Bacteria,2IJK9@201174|Actinobacteria,238RJ@1762|Mycobacteriaceae	201174|Actinobacteria	K	Acts as a transcriptional regulator. Probably redox- responsive. The apo- but not holo-form probably binds DNA	whiB5	GO:0005575,GO:0005618,GO:0005623,GO:0030312,GO:0044464,GO:0071944	-	ko:K18956	-	-	-	-	ko00000,ko03000	-	-	-	Whib
lcl|NC_009525.1_cds_WP_003400391.1_26	419947.MRA_0026	7.35e-174	486.0	COG1396@1|root,COG1396@2|Bacteria,2GMSM@201174|Actinobacteria,233FD@1762|Mycobacteriaceae	201174|Actinobacteria	K	Helix-turn-helix	-	-	-	-	-	-	-	-	-	-	-	-	HTH_3,HTH_31
lcl|NC_009525.1_cds_MRA_RS00160_29	419947.MRA_0029	8.53e-307	838.0	2ATF1@1|root,31IYH@2|Bacteria,2IAF1@201174|Actinobacteria,234NI@1762|Mycobacteriaceae	201174|Actinobacteria	S	Domain of unknown function (DUF4226)	-	-	-	-	-	-	-	-	-	-	-	-	DUF4226
lcl|NC_009525.1_cds_WP_003400411.1_33	419947.MRA_0032	2.94e-262	718.0	2A1TI@1|root,31TWI@2|Bacteria,2IACP@201174|Actinobacteria,2370S@1762|Mycobacteriaceae	201174|Actinobacteria	-	-	-	-	-	-	-	-	-	-	-	-	-	-	-
lcl|NC_009525.1_cds_WP_003905217.1_35	419947.MRA_0035	0.0	1558.0	COG0156@1|root,COG3146@1|root,COG0156@2|Bacteria,COG3146@2|Bacteria,2GISV@201174|Actinobacteria,237IF@1762|Mycobacteriaceae	201174|Actinobacteria	H	Could be involved in biotin biosynthesis (at the first step) catalytic activity 6-carboxyhexanoyl-CoA L- alanine 8-amino-7-oxononanoate CoA CO2	bioF2	GO:0005575,GO:0005618,GO:0005623,GO:0030312,GO:0044464,GO:0071944	2.3.1.47	ko:K00652	ko00780,ko01100,map00780,map01100	M00123,M00573,M00577	R03210,R10124	RC00004,RC00039,RC02725	ko00000,ko00001,ko00002,ko01000,ko01007	-	-	-	Acetyltransf_6,Aminotran_1_2
lcl|NC_009525.1_cds_WP_003400418.1_36	419947.MRA_0036	1.02e-55	173.0	COG0236@1|root,COG0236@2|Bacteria	2|Bacteria	IQ	Carrier of the growing fatty acid chain in fatty acid biosynthesis	acpP	-	6.2.1.50	ko:K02078,ko:K12424	-	-	R11608,R11872,R11873	-	ko00000,ko00001,ko01000,ko01004	-	-	-	PP-binding
lcl|NC_009525.1_cds_WP_003400427.1_39	419947.MRA_0039	1.84e-188	523.0	28HG7@1|root,2Z7S3@2|Bacteria,2GMJK@201174|Actinobacteria,235MK@1762|Mycobacteriaceae	201174|Actinobacteria	S	Wyosine base formation	-	GO:0005575,GO:0005618,GO:0005623,GO:0005886,GO:0016020,GO:0030312,GO:0044464,GO:0071944	-	-	-	-	-	-	-	-	-	-	MDMPI_N,Wyosine_form
lcl|NC_009525.1_cds_WP_011961602.1_40	419947.MRA_0040	1.04e-305	835.0	COG2270@1|root,COG2270@2|Bacteria,2GK5A@201174|Actinobacteria,2361B@1762|Mycobacteriaceae	201174|Actinobacteria	S	Major facilitator superfamily	-	-	-	-	-	-	-	-	-	-	-	-	MFS_1
lcl|NC_009525.1_cds_WP_003907179.1_42	419947.MRA_0042	1.85e-71	215.0	2BG6T@1|root,32A3P@2|Bacteria,2IR6A@201174|Actinobacteria,23AWK@1762|Mycobacteriaceae	201174|Actinobacteria	-	-	-	-	-	-	-	-	-	-	-	-	-	-	-
lcl|NC_009525.1_cds_WP_003900793.1_43	419947.MRA_0043	1.07e-193	540.0	2APGE@1|root,31EJ8@2|Bacteria,2GMF1@201174|Actinobacteria,236Q8@1762|Mycobacteriaceae	201174|Actinobacteria	S	Probable lipoprotein LpqN	mtc28	GO:0005575,GO:0005576	-	-	-	-	-	-	-	-	-	-	Lpp-LpqN
lcl|NC_009525.1_cds_WP_003900794.1_44	419947.MRA_0044	0.0	1982.0	COG0495@1|root,COG0495@2|Bacteria,2GJI1@201174|Actinobacteria,23584@1762|Mycobacteriaceae	201174|Actinobacteria	J	Belongs to the class-I aminoacyl-tRNA synthetase family	leuS	GO:0003674,GO:0003824,GO:0004812,GO:0004823,GO:0005575,GO:0005618,GO:0005622,GO:0005623,GO:0005737,GO:0005829,GO:0005886,GO:0006082,GO:0006139,GO:0006399,GO:0006412,GO:0006418,GO:0006429,GO:0006518,GO:0006520,GO:0006725,GO:0006807,GO:0008150,GO:0008152,GO:0009058,GO:0009059,GO:0009987,GO:0010467,GO:0016020,GO:0016070,GO:0016874,GO:0016875,GO:0019538,GO:0019752,GO:0030312,GO:0034641,GO:0034645,GO:…	6.1.1.4	ko:K01869	ko00970,map00970	M00359,M00360	R03657	RC00055,RC00523	ko00000,ko00001,ko00002,ko01000,ko01007,ko03016,ko03029	-	-	-	Anticodon_1,tRNA-synt_1,tRNA-synt_1_2
lcl|NC_009525.1_cds_WP_003899786.1_46	419947.MRA_0046	2.5e-175	488.0	COG1802@1|root,COG1802@2|Bacteria,2GKPP@201174|Actinobacteria,2358E@1762|Mycobacteriaceae	201174|Actinobacteria	K	transcriptional	-	-	-	-	-	-	-	-	-	-	-	-	FCD,GntR
lcl|NC_009525.1_cds_WP_003400486.1_47	419947.MRA_0047	4.53e-197	545.0	COG2141@1|root,COG2141@2|Bacteria,2GPA5@201174|Actinobacteria,236QF@1762|Mycobacteriaceae	201174|Actinobacteria	C	COG2141 Coenzyme F420-dependent N5,N10-methylene tetrahydromethanopterin reductase and related flavin-dependent oxidoreductases	-	-	-	-	-	-	-	-	-	-	-	-	Bac_luciferase
lcl|NC_009525.1_cds_WP_003902822.1_49	419947.MRA_0049	1.53e-265	727.0	COG1260@1|root,COG1260@2|Bacteria,2GKHB@201174|Actinobacteria,23475@1762|Mycobacteriaceae	201174|Actinobacteria	I	synthase	ino1	GO:0003674,GO:0003824,GO:0004512,GO:0005488,GO:0005575,GO:0005622,GO:0005623,GO:0005737,GO:0005829,GO:0006790,GO:0008150,GO:0008152,GO:0008270,GO:0009058,GO:0009405,GO:0009987,GO:0010125,GO:0010126,GO:0016137,GO:0016138,GO:0016853,GO:0016872,GO:0043167,GO:0043169,GO:0044237,GO:0044249,GO:0044272,GO:0044419,GO:0044424,GO:0044444,GO:0044464,GO:0046872,GO:0046914,GO:0051186,GO:0051188,GO:0051704,GO:…	5.5.1.4	ko:K01858	ko00521,ko00562,ko01100,ko01130,map00521,map00562,map01100,map01130	-	R07324	RC01804	ko00000,ko00001,ko01000	-	-	-	Inos-1-P_synth
lcl|NC_009525.1_cds_WP_003899787.1_50	419947.MRA_0050	2.49e-123	352.0	COG1695@1|root,COG1695@2|Bacteria,2GMJM@201174|Actinobacteria,235Z0@1762|Mycobacteriaceae	201174|Actinobacteria	K	Transcriptional regulator	-	-	-	-	-	-	-	-	-	-	-	-	PadR,Vir_act_alpha_C
lcl|NC_009525.1_cds_WP_003907183.1_51	419947.MRA_0051	1.07e-203	564.0	2FB62@1|root,343CC@2|Bacteria,2GM8N@201174|Actinobacteria,23378@1762|Mycobacteriaceae	201174|Actinobacteria	S	Domain of unknown function (DUF1707)	-	GO:0005575,GO:0005618,GO:0005623,GO:0005886,GO:0005887,GO:0016020,GO:0016021,GO:0030312,GO:0031224,GO:0031226,GO:0044425,GO:0044459,GO:0044464,GO:0071944	-	-	-	-	-	-	-	-	-	-	DUF1707
lcl|NC_009525.1_cds_WP_003900796.1_53	419947.MRA_0053	0.0	1284.0	COG0744@1|root,COG0744@2|Bacteria,2GK21@201174|Actinobacteria,233EY@1762|Mycobacteriaceae	201174|Actinobacteria	M	penicillin-binding protein	pbp1A	GO:0001666,GO:0003674,GO:0005488,GO:0005575,GO:0005623,GO:0006950,GO:0008144,GO:0008150,GO:0008658,GO:0009628,GO:0009987,GO:0030288,GO:0030313,GO:0031406,GO:0031975,GO:0033218,GO:0033293,GO:0033554,GO:0036094,GO:0036293,GO:0036294,GO:0042221,GO:0042597,GO:0043167,GO:0043168,GO:0043177,GO:0044464,GO:0050896,GO:0051716,GO:0070482,GO:0070887,GO:0071453,GO:0071456,GO:0097159,GO:1901363,GO:1901681	-	-	-	-	-	-	-	-	-	-	Transgly,Transpeptidase
lcl|NC_009525.1_cds_WP_003400514.1_54	419947.MRA_0054	0.0	1110.0	COG5650@1|root,COG5650@2|Bacteria,2GJYA@201174|Actinobacteria,233JA@1762|Mycobacteriaceae	201174|Actinobacteria	S	integral membrane protein	-	-	-	-	-	-	-	-	-	-	-	-	GT87
lcl|NC_009525.1_cds_WP_003912418.1_55	419947.MRA_0055	3.37e-131	373.0	COG0693@1|root,COG0693@2|Bacteria,2H6FV@201174|Actinobacteria,232C9@1762|Mycobacteriaceae	201174|Actinobacteria	S	DJ-1 PfpI family	-	-	-	-	-	-	-	-	-	-	-	-	DJ-1_PfpI
lcl|NC_009525.1_cds_WP_003916208.1_61	419947.MRA_0060	0.0	1718.0	COG0305@1|root,COG1372@1|root,COG0305@2|Bacteria,COG1372@2|Bacteria,2GKXQ@201174|Actinobacteria,234JE@1762|Mycobacteriaceae	201174|Actinobacteria	L	Participates in initiation and elongation during chromosome replication	dnaB	GO:0003674,GO:0003678,GO:0003824,GO:0004386,GO:0005575,GO:0005618,GO:0005622,GO:0005623,GO:0005737,GO:0005829,GO:0006139,GO:0006259,GO:0006260,GO:0006261,GO:0006268,GO:0006725,GO:0006807,GO:0006950,GO:0006974,GO:0006996,GO:0008150,GO:0008152,GO:0009058,GO:0009059,GO:0009987,GO:0016043,GO:0016462,GO:0016787,GO:0016817,GO:0016818,GO:0017111,GO:0030312,GO:0032392,GO:0032508,GO:0033554,GO:0034641,GO:…	3.6.4.12	ko:K02314	ko03030,ko04112,map03030,map04112	-	-	-	ko00000,ko00001,ko01000,ko03032	-	-	-	DnaB,DnaB_C,Intein_splicing,LAGLIDADG_3
lcl|NC_009525.1_cds_WP_003901784.1_66	419947.MRA_0065	0.0	943.0	COG0277@1|root,COG0277@2|Bacteria,2GK5U@201174|Actinobacteria,2349Y@1762|Mycobacteriaceae	201174|Actinobacteria	C	oxidoreductase	-	-	-	-	-	-	-	-	-	-	-	-	BBE,FAD_binding_4
lcl|NC_009525.1_cds_WP_009937016.1_68	419947.MRA_0066	0.0	1846.0	COG1615@1|root,COG1615@2|Bacteria,2GMP3@201174|Actinobacteria,2375X@1762|Mycobacteriaceae	201174|Actinobacteria	S	Uncharacterised protein family (UPF0182)	-	GO:0005575,GO:0005576,GO:0005618,GO:0005623,GO:0005886,GO:0016020,GO:0030312,GO:0044464,GO:0071944	-	ko:K09118	-	-	-	-	ko00000	-	-	-	UPF0182
lcl|NC_009525.1_cds_WP_003899797.1_71	419947.MRA_0068	0.0	1483.0	COG2838@1|root,COG2838@2|Bacteria,2GJ1C@201174|Actinobacteria,233H0@1762|Mycobacteriaceae	201174|Actinobacteria	C	Isocitrate dehydrogenase	icd	-	1.1.1.42	ko:K00031	ko00020,ko00480,ko00720,ko01100,ko01110,ko01120,ko01130,ko01200,ko01210,ko01230,ko04146,map00020,map00480,map00720,map01100,map01110,map01120,map01130,map01200,map01210,map01230,map04146	M00009,M00010,M00173,M00740	R00267,R00268,R01899	RC00001,RC00084,RC00114,RC00626,RC02801	br01601,ko00000,ko00001,ko00002,ko01000	-	-	-	IDH
lcl|NC_009525.1_cds_WP_003400591.1_72	419947.MRA_0069	1.08e-126	361.0	COG1309@1|root,COG1309@2|Bacteria,2IMF7@201174|Actinobacteria,235TM@1762|Mycobacteriaceae	201174|Actinobacteria	K	Transcriptional regulator	-	-	-	-	-	-	-	-	-	-	-	-	TetR_N
lcl|NC_009525.1_cds_WP_003912371.1_73	419947.MRA_0070	3.2e-212	587.0	COG1028@1|root,COG1028@2|Bacteria,2GIYQ@201174|Actinobacteria,233HK@1762|Mycobacteriaceae	201174|Actinobacteria	IQ	Belongs to the short-chain dehydrogenases reductases (SDR) family	-	-	-	-	-	-	-	-	-	-	-	-	adh_short
lcl|NC_009525.1_cds_WP_003899799.1_75	419947.MRA_0072	4.42e-308	839.0	COG0112@1|root,COG0112@2|Bacteria,2GK7U@201174|Actinobacteria,233GB@1762|Mycobacteriaceae	201174|Actinobacteria	E	Catalyzes the reversible interconversion of serine and glycine with tetrahydrofolate (THF) serving as the one-carbon carrier. This reaction serves as the major source of one-carbon groups required for the biosynthesis of purines, thymidylate, methionine, and other important biomolecules. Also exhibits THF- independent aldolase activity toward beta-hydroxyamino acids, producing glycine and aldehyd…	glyA	GO:0001505,GO:0003674,GO:0003824,GO:0004372,GO:0005488,GO:0005515,GO:0005575,GO:0005623,GO:0005886,GO:0006082,GO:0006520,GO:0006544,GO:0006563,GO:0006807,GO:0008144,GO:0008150,GO:0008152,GO:0009069,GO:0009987,GO:0016020,GO:0016740,GO:0016741,GO:0016742,GO:0017144,GO:0019752,GO:0019842,GO:0030170,GO:0036094,GO:0042133,GO:0042802,GO:0042803,GO:0043167,GO:0043168,GO:0043436,GO:0044237,GO:0044238,GO:…	2.1.2.1	ko:K00600	ko00260,ko00460,ko00630,ko00670,ko00680,ko01100,ko01110,ko01120,ko01130,ko01200,ko01230,ko01523,map00260,map00460,map00630,map00670,map00680,map01100,map01110,map01120,map01130,map01200,map01230,map01523	M00140,M00141,M00346,M00532	R00945,R09099	RC00022,RC00112,RC01583,RC02958	ko00000,ko00001,ko00002,ko01000	-	-	-	SHMT
lcl|NC_009525.1_cds_WP_003899801.1_79	419947.MRA_0075	8.03e-231	636.0	COG0664@1|root,COG1136@1|root,COG0664@2|Bacteria,COG1136@2|Bacteria,2GJN6@201174|Actinobacteria,233TP@1762|Mycobacteriaceae	201174|Actinobacteria	V	ABC transporter	-	-	-	ko:K02003	-	M00258	-	-	ko00000,ko00002,ko02000	3.A.1	-	-	ABC_tran,cNMP_binding
lcl|NC_009525.1_cds_WP_003400620.1_80	419947.MRA_0076	2.93e-299	816.0	COG1228@1|root,COG1228@2|Bacteria,2GMUS@201174|Actinobacteria,2341E@1762|Mycobacteriaceae	201174|Actinobacteria	Q	amidohydrolase	-	-	-	-	-	-	-	-	-	-	-	-	Amidohydro_1
lcl|NC_009525.1_cds_WP_003900801.1_83	419947.MRA_0079	4.01e-197	546.0	COG2267@1|root,COG2267@2|Bacteria,2HJ2M@201174|Actinobacteria,234DI@1762|Mycobacteriaceae	201174|Actinobacteria	I	Alpha beta hydrolase	-	-	-	-	-	-	-	-	-	-	-	-	Abhydrolase_1,Abhydrolase_6
lcl|NC_009525.1_cds_WP_003899803.1_84	419947.MRA_0080	2.61e-133	379.0	COG1309@1|root,COG1309@2|Bacteria,2GNR9@201174|Actinobacteria,2353Y@1762|Mycobacteriaceae	201174|Actinobacteria	K	Transcriptional regulator	-	-	-	-	-	-	-	-	-	-	-	-	TetR_N
lcl|NC_009525.1_cds_WP_003899804.1_88	419947.MRA_0084	1.84e-100	291.0	COG3467@1|root,COG3467@2|Bacteria,2IQ9Y@201174|Actinobacteria	201174|Actinobacteria	K	pyridoxamine 5-phosphate	-	-	-	-	-	-	-	-	-	-	-	-	Pyridox_ox_2
lcl|NC_009525.1_cds_WP_003400657.1_89	419947.MRA_0085	7.86e-68	206.0	COG0640@1|root,COG0640@2|Bacteria,2IKK2@201174|Actinobacteria,239WV@1762|Mycobacteriaceae	201174|Actinobacteria	K	transcriptional	-	GO:0005575,GO:0005623,GO:0005886,GO:0016020,GO:0044464,GO:0071944	-	ko:K03892	-	-	-	-	ko00000,ko03000	-	-	-	HTH_20,HTH_5
lcl|NC_009525.1_cds_WP_003907280.1_91	419947.MRA_0087	0.0	1143.0	COG0651@1|root,COG0651@2|Bacteria,2HAC7@201174|Actinobacteria,2352A@1762|Mycobacteriaceae	201174|Actinobacteria	CP	Proton-conducting membrane transporter	-	-	-	ko:K12137	-	-	-	-	ko00000,ko01000	-	-	-	Proton_antipo_M
lcl|NC_009525.1_cds_WP_003900802.1_92	419947.MRA_0088	3.2e-198	552.0	COG0650@1|root,COG0650@2|Bacteria,2GJFM@201174|Actinobacteria,236KY@1762|Mycobacteriaceae	201174|Actinobacteria	C	Formate hydrogenlyase	hycD	-	-	ko:K12138	-	-	-	-	ko00000,ko01000	-	-	-	NADHdh
lcl|NC_009525.1_cds_WP_003899808.1_100	419947.MRA_0096	0.0	1418.0	COG2217@1|root,COG2217@2|Bacteria,2GIRF@201174|Actinobacteria,232VV@1762|Mycobacteriaceae	201174|Actinobacteria	P	ATPase, P-type (transporting), HAD superfamily, subfamily IC	ctpA	GO:0005575,GO:0005576,GO:0005618,GO:0005623,GO:0030312,GO:0044464,GO:0071944	3.6.3.54	ko:K12949,ko:K17686	ko01524,ko04016,map01524,map04016	-	R00086	RC00002	ko00000,ko00001,ko01000	3.A.3,3.A.3.5	-	-	E1-E2_ATPase,HMA,Hydrolase
lcl|NC_009525.1_cds_MRA_RS00520_102	419947.MRA_0099	2.98e-61	189.0	COG1403@1|root,COG1403@2|Bacteria,2GU7G@201174|Actinobacteria,232NV@1762|Mycobacteriaceae	201174|Actinobacteria	V	Domain of unknown function (DUF222)	-	-	-	-	-	-	-	-	-	-	-	-	DUF222,HNH
lcl|NC_009525.1_cds_WP_003899810.1_105	419947.MRA_0102	2.21e-132	375.0	2CJNX@1|root,32SAE@2|Bacteria,2IMAB@201174|Actinobacteria,2374P@1762|Mycobacteriaceae	201174|Actinobacteria	S	FcoT-like thioesterase domain	fcoT	GO:0003674,GO:0003824,GO:0005575,GO:0005623,GO:0005886,GO:0006082,GO:0006629,GO:0006631,GO:0006633,GO:0008150,GO:0008152,GO:0008610,GO:0009058,GO:0009987,GO:0016020,GO:0016053,GO:0016289,GO:0016787,GO:0016788,GO:0016790,GO:0019752,GO:0032787,GO:0043436,GO:0044237,GO:0044238,GO:0044249,GO:0044255,GO:0044281,GO:0044283,GO:0044464,GO:0046394,GO:0047617,GO:0071704,GO:0071944,GO:0072330,GO:1901576	-	-	-	-	-	-	-	-	-	-	FcoT
lcl|NC_009525.1_cds_MRA_RS00560_108	419947.MRA_0105	3.88e-60	185.0	COG1020@1|root,COG1020@2|Bacteria,2GISR@201174|Actinobacteria,233YJ@1762|Mycobacteriaceae	201174|Actinobacteria	Q	Peptide synthetase	nrp	-	-	ko:K04780,ko:K15653	ko01053,map01053	-	-	-	ko00000,ko00001,ko01008	-	-	-	AMP-binding,AMP-binding_C,Condensation,NAD_binding_4,PP-binding,Thioesterase
lcl|NC_009525.1_cds_WP_003900808.1_109	419947.MRA_0107	0.0	1265.0	COG3336@1|root,COG3336@2|Bacteria,2GKIR@201174|Actinobacteria,233IV@1762|Mycobacteriaceae	201174|Actinobacteria	P	CytoChrome c oxidase Caa3 assembly factor	-	GO:0008150,GO:0040007	-	ko:K02351,ko:K07245	-	-	-	-	ko00000,ko02000	9.B.62.1	-	-	Caa3_CtaG,CopD
lcl|NC_009525.1_cds_WP_009935939.1_110	419947.MRA_0108	0.0	1391.0	COG2217@1|root,COG2217@2|Bacteria,2GIRF@201174|Actinobacteria,232VV@1762|Mycobacteriaceae	201174|Actinobacteria	P	ATPase, P-type (transporting), HAD superfamily, subfamily IC	ctpB	GO:0005575,GO:0005622,GO:0005623,GO:0005737,GO:0005829,GO:0005886,GO:0016020,GO:0044424,GO:0044444,GO:0044464,GO:0071944	3.6.3.54	ko:K12949,ko:K17686	ko01524,ko04016,map01524,map04016	-	R00086	RC00002	ko00000,ko00001,ko01000	3.A.3,3.A.3.5	-	-	E1-E2_ATPase,HMA,Hydrolase
lcl|NC_009525.1_cds_WP_003899813.1_111	419947.MRA_0109	0.0	978.0	COG0499@1|root,COG0664@1|root,COG0499@2|Bacteria,COG0664@2|Bacteria,2I8MP@201174|Actinobacteria,23DDH@1762|Mycobacteriaceae	201174|Actinobacteria	HT	Cyclic nucleotide-binding domain	-	-	-	-	-	-	-	-	-	-	-	-	cNMP_binding
lcl|NC_009525.1_cds_WP_010886065.1_115	419947.MRA_0112	0.0	3023.0	COG0474@1|root,COG0474@2|Bacteria,2GJJC@201174|Actinobacteria,232MQ@1762|Mycobacteriaceae	201174|Actinobacteria	P	ATPase, P-type (transporting), HAD superfamily, subfamily IC	ctpI	GO:0003674,GO:0003824,GO:0005215,GO:0005388,GO:0005575,GO:0005618,GO:0005622,GO:0005623,GO:0005737,GO:0005829,GO:0005886,GO:0005887,GO:0006810,GO:0006811,GO:0006812,GO:0006816,GO:0008150,GO:0008324,GO:0015075,GO:0015085,GO:0015318,GO:0015399,GO:0015405,GO:0015662,GO:0016020,GO:0016021,GO:0016462,GO:0016787,GO:0016817,GO:0016818,GO:0016887,GO:0017111,GO:0019829,GO:0022804,GO:0022853,GO:0022857,GO:…	-	ko:K12955	-	-	-	-	ko00000,ko01000	3.A.3.24	-	-	Cation_ATPase_C,E1-E2_ATPase,Hydrolase
lcl|NC_009525.1_cds_WP_003900811.1_119	419947.MRA_0117	0.0	1367.0	COG1835@1|root,COG2755@1|root,COG1835@2|Bacteria,COG2755@2|Bacteria,2GKI5@201174|Actinobacteria,23435@1762|Mycobacteriaceae	201174|Actinobacteria	EI	Acyltransferase	-	-	-	-	-	-	-	-	-	-	-	-	Acyl_transf_3
lcl|NC_009525.1_cds_WP_003400829.1_120	419947.MRA_0118	2.52e-237	651.0	COG0451@1|root,COG0451@2|Bacteria,2I4MR@201174|Actinobacteria	201174|Actinobacteria	GM	GDP-mannose 4,6 dehydratase	gca	-	1.1.1.281	ko:K15856	ko00051,ko00520,map00051,map00520	-	R03397,R03399	RC00182	ko00000,ko00001,ko01000	-	-	-	Epimerase,GDP_Man_Dehyd
lcl|NC_009525.1_cds_WP_003899819.1_123	419947.MRA_0121	2.6e-278	761.0	COG2605@1|root,COG2605@2|Bacteria,2IAQG@201174|Actinobacteria,239KC@1762|Mycobacteriaceae	201174|Actinobacteria	S	GHMP kinases C terminal	hddA	-	2.7.1.168	ko:K07031	ko00540,map00540	-	R09770	RC00002,RC00078	ko00000,ko00001,ko01000	-	-	-	GHMP_kinases_C,GHMP_kinases_N
lcl|NC_009525.1_cds_WP_003400857.1_126	419947.MRA_0124	5.15e-219	605.0	COG0583@1|root,COG0583@2|Bacteria,2H0AE@201174|Actinobacteria,234NB@1762|Mycobacteriaceae	201174|Actinobacteria	K	Bacterial regulatory helix-turn-helix protein, lysR family	oxyS	-	-	-	-	-	-	-	-	-	-	-	HTH_1,LysR_substrate
lcl|NC_009525.1_cds_WP_003900812.1_127	419947.MRA_0125	0.0	1135.0	COG0028@1|root,COG0028@2|Bacteria,2GM6Y@201174|Actinobacteria,236VZ@1762|Mycobacteriaceae	201174|Actinobacteria	EH	Belongs to the TPP enzyme family	oxc	-	4.1.1.8	ko:K01577	ko00630,ko01100,map00630,map01100	-	R01908	RC00620	ko00000,ko00001,ko01000	-	-	iNJ661.Rv0118c	TPP_enzyme_C,TPP_enzyme_M,TPP_enzyme_N
lcl|NC_009525.1_cds_WP_003901806.1_128	419947.MRA_0126	0.0	1019.0	COG0318@1|root,COG0318@2|Bacteria,2GIUC@201174|Actinobacteria,237ZW@1762|Mycobacteriaceae	201174|Actinobacteria	IQ	AMP-binding enzyme C-terminal domain	fadD7	-	-	ko:K16029	ko01051,ko01052,map01051,map01052	-	-	-	ko00000,ko00001	-	-	-	AMP-binding,AMP-binding_C,PP-binding
lcl|NC_009525.1_cds_WP_003916609.1_129	419947.MRA_0127	0.0	1387.0	COG0480@1|root,COG0480@2|Bacteria,2GKRU@201174|Actinobacteria,232MP@1762|Mycobacteriaceae	201174|Actinobacteria	J	elongation factor G	fusA2	GO:0005575,GO:0005618,GO:0005623,GO:0005886,GO:0006790,GO:0008150,GO:0008152,GO:0009987,GO:0016020,GO:0030312,GO:0044237,GO:0044464,GO:0071944	-	ko:K02355	-	-	-	-	ko00000,ko03012,ko03029	-	-	-	EFG_C,EFG_II,EFG_IV,GTP_EFTU,GTP_EFTU_D2
lcl|NC_009525.1_cds_WP_011961604.1_133	419947.MRA_0131	3.47e-59	209.0	COG0657@1|root,COG0657@2|Bacteria	2|Bacteria	I	acetylesterase activity	-	-	3.1.1.3	ko:K01046	ko00561,ko01100,map00561,map01100	M00098	R02250,R02687	RC00020,RC00037,RC00041,RC00094	ko00000,ko00001,ko00002,ko01000	-	-	-	Abhydrolase_3,PE
lcl|NC_009525.1_cds_WP_003916610.1_136	419947.MRA_0134	0.0	902.0	COG3281@1|root,COG3281@2|Bacteria,2GKAP@201174|Actinobacteria,233ET@1762|Mycobacteriaceae	201174|Actinobacteria	G	Catalyzes the ATP-dependent phosphorylation of maltose to maltose 1-phosphate. Is involved in a branched alpha-glucan biosynthetic pathway from trehalose, together with TreS, GlgE and GlgB (By similarity)	mak	GO:0005575,GO:0005622,GO:0005623,GO:0005737,GO:0005829,GO:0005886,GO:0005975,GO:0005984,GO:0005991,GO:0005992,GO:0006793,GO:0006796,GO:0008150,GO:0008152,GO:0009058,GO:0009311,GO:0009312,GO:0009987,GO:0016020,GO:0016051,GO:0016310,GO:0034637,GO:0040007,GO:0044237,GO:0044238,GO:0044249,GO:0044262,GO:0044424,GO:0044444,GO:0044464,GO:0046351,GO:0046835,GO:0071704,GO:0071944,GO:1901576	2.7.1.175	ko:K16146	ko00500,ko01100,map00500,map01100	-	R09945	RC00002,RC00078	ko00000,ko00001,ko01000	-	-	-	APH
lcl|NC_009525.1_cds_WP_003899825.1_137	419947.MRA_0135	4.65e-183	509.0	COG3619@1|root,COG3619@2|Bacteria,2H2DS@201174|Actinobacteria,236V9@1762|Mycobacteriaceae	201174|Actinobacteria	S	Protein of unknown function (DUF1275)	-	-	-	-	-	-	-	-	-	-	-	-	DUF1275
lcl|NC_009525.1_cds_WP_003899826.1_141	419947.MRA_0139	2.95e-264	723.0	COG2141@1|root,COG2141@2|Bacteria,2GM94@201174|Actinobacteria,236ZN@1762|Mycobacteriaceae	201174|Actinobacteria	C	Luciferase-like monooxygenase	fgd2	GO:0005575,GO:0005623,GO:0005886,GO:0016020,GO:0044464,GO:0071944	1.1.98.2	ko:K15510	-	-	-	-	ko00000,ko01000	-	-	-	Bac_luciferase
lcl|NC_009525.1_cds_WP_003400942.1_146	419947.MRA_0144	4.48e-136	384.0	COG0225@1|root,COG0225@2|Bacteria,2GJ1S@201174|Actinobacteria,2339H@1762|Mycobacteriaceae	201174|Actinobacteria	O	Has an important function as a repair enzyme for proteins that have been inactivated by oxidation. Catalyzes the reversible oxidation-reduction of methionine sulfoxide in proteins to methionine	msrA	GO:0003674,GO:0003824,GO:0005575,GO:0005622,GO:0005623,GO:0005737,GO:0005829,GO:0006950,GO:0006979,GO:0008113,GO:0008150,GO:0008152,GO:0009605,GO:0009607,GO:0016491,GO:0016667,GO:0016671,GO:0020012,GO:0030682,GO:0033744,GO:0043207,GO:0044403,GO:0044413,GO:0044415,GO:0044419,GO:0044424,GO:0044444,GO:0044464,GO:0050896,GO:0051409,GO:0051701,GO:0051704,GO:0051707,GO:0051805,GO:0051807,GO:0051832,GO:…	1.8.4.11,1.8.4.12	ko:K07304,ko:K12267	-	-	-	-	ko00000,ko01000	-	-	-	PMSR,SelR
lcl|NC_009525.1_cds_WP_003400947.1_148	419947.MRA_0146	1.48e-247	679.0	COG0451@1|root,COG0451@2|Bacteria,2GN90@201174|Actinobacteria,23297@1762|Mycobacteriaceae	201174|Actinobacteria	GM	epimerase dehydratase	-	-	1.1.1.219	ko:K00091	-	-	-	-	ko00000,ko01000	-	-	-	Epimerase
lcl|NC_009525.1_cds_WP_003899828.1_152	419947.MRA_0150	0.0	946.0	COG0038@1|root,COG0038@2|Bacteria,2GPPN@201174|Actinobacteria,2351T@1762|Mycobacteriaceae	201174|Actinobacteria	P	Chloride channel	clcA	-	-	ko:K03281	-	-	-	-	ko00000	2.A.49	-	-	Voltage_CLC
lcl|NC_009525.1_cds_WP_003899829.1_154	419947.MRA_0152	2.3e-228	629.0	COG3315@1|root,COG3315@2|Bacteria,2GM4W@201174|Actinobacteria,2352U@1762|Mycobacteriaceae	201174|Actinobacteria	H	Exhibits S-adenosyl-L-methionine-dependent methyltransferase activity	-	-	-	-	-	-	-	-	-	-	-	-	LCM
lcl|NC_009525.1_cds_WP_003900814.1_155	419947.MRA_0153	1.37e-221	611.0	COG3315@1|root,COG3315@2|Bacteria,2GM4W@201174|Actinobacteria,234GY@1762|Mycobacteriaceae	201174|Actinobacteria	Q	Exhibits S-adenosyl-L-methionine-dependent methyltransferase activity	-	GO:0002682,GO:0002684,GO:0005575,GO:0005622,GO:0005623,GO:0005737,GO:0005829,GO:0005886,GO:0008150,GO:0009605,GO:0009607,GO:0016020,GO:0035821,GO:0043207,GO:0044003,GO:0044403,GO:0044419,GO:0044424,GO:0044444,GO:0044464,GO:0048518,GO:0048583,GO:0048584,GO:0050776,GO:0050778,GO:0050789,GO:0050896,GO:0051701,GO:0051704,GO:0051707,GO:0051817,GO:0052031,GO:0052173,GO:0052200,GO:0052255,GO:0052552,GO:…	-	-	-	-	-	-	-	-	-	-	LCM
lcl|NC_009525.1_cds_WP_003911119.1_160	419947.MRA_0158	0.0	1050.0	COG5651@1|root,COG5651@2|Bacteria,2IC1C@201174|Actinobacteria,232VY@1762|Mycobacteriaceae	201174|Actinobacteria	N	PE-PPE domain	-	-	-	-	-	-	-	-	-	-	-	-	PE,PE-PPE
lcl|NC_009525.1_cds_MRA_RS00820_161	1265310.CCBD010000055_gene1449	6.8e-14	71.6	COG0657@1|root,COG0657@2|Bacteria,2ICS4@201174|Actinobacteria,2377W@1762|Mycobacteriaceae	201174|Actinobacteria	I	Member of the Mycobacterium tuberculosis PE family, PGRS subfamily of gly-rich proteins (see	-	-	-	-	-	-	-	-	-	-	-	-	PE
lcl|NC_009525.1_cds_WP_003401010.1_162	419947.MRA_0161	9.06e-194	538.0	COG2365@1|root,COG2365@2|Bacteria,2GK28@201174|Actinobacteria,235K2@1762|Mycobacteriaceae	201174|Actinobacteria	T	COG2365 Protein tyrosine serine phosphatase	ptpB	-	3.1.3.48	ko:K01104	-	-	-	-	ko00000,ko01000	-	-	-	Y_phosphatase3
lcl|NC_009525.1_cds_WP_003911094.1_170	419947.MRA_0167	3.55e-316	863.0	COG0657@1|root,COG5651@1|root,COG0657@2|Bacteria,COG5651@2|Bacteria,2GNAQ@201174|Actinobacteria,233V6@1762|Mycobacteriaceae	201174|Actinobacteria	N	PFAM PE-PPE, C-terminal	-	-	-	-	-	-	-	-	-	-	-	-	PE,PE-PPE
lcl|NC_009525.1_cds_WP_003900817.1_171	419947.MRA_0168	0.0	1004.0	COG5651@1|root,COG5651@2|Bacteria,2GNAQ@201174|Actinobacteria,233V6@1762|Mycobacteriaceae	201174|Actinobacteria	N	PFAM PE-PPE, C-terminal	-	-	-	-	-	-	-	-	-	-	-	-	PE,PE-PPE
lcl|NC_009525.1_cds_WP_003899837.1_177	419947.MRA_0174	0.0	1087.0	COG0318@1|root,COG0318@2|Bacteria,2GIUC@201174|Actinobacteria,232ME@1762|Mycobacteriaceae	201174|Actinobacteria	IQ	COG0318 Acyl-CoA synthetases (AMP-forming) AMP-acid ligases II	fadD5	-	6.2.1.3	ko:K00666,ko:K01897	ko00061,ko00071,ko01100,ko01212,ko02024,ko03320,ko04146,ko04216,ko04714,ko04920,map00061,map00071,map01100,map01212,map02024,map03320,map04146,map04216,map04714,map04920	M00086	R01280	RC00004,RC00014	ko00000,ko00001,ko00002,ko01000,ko01004,ko04147	4.C.1.1	-	-	AMP-binding,AMP-binding_C
lcl|NC_009525.1_cds_WP_003899838.1_180	419947.MRA_0177	4.86e-313	854.0	COG1463@1|root,COG1463@2|Bacteria,2GNXB@201174|Actinobacteria,233R8@1762|Mycobacteriaceae	201174|Actinobacteria	Q	Virulence factor Mce family protein	mce1A	-	-	ko:K02067	ko02010,map02010	M00210,M00669,M00670	-	-	ko00000,ko00001,ko00002,ko02000	3.A.1.27	-	-	Mce4_CUP1,MlaD
lcl|NC_009525.1_cds_WP_003899839.1_181	419947.MRA_0178	2.27e-245	674.0	COG1463@1|root,COG1463@2|Bacteria,2GKHV@201174|Actinobacteria,2356V@1762|Mycobacteriaceae	201174|Actinobacteria	Q	Virulence factor Mce family protein	mce1B	-	-	ko:K02067	ko02010,map02010	M00210,M00669,M00670	-	-	ko00000,ko00001,ko00002,ko02000	3.A.1.27	-	-	Mce4_CUP1,MlaD
lcl|NC_009525.1_cds_WP_003901818.1_182	419947.MRA_0179	0.0	892.0	COG1463@1|root,COG1463@2|Bacteria,2GMU6@201174|Actinobacteria,233E5@1762|Mycobacteriaceae	201174|Actinobacteria	Q	Virulence factor Mce family protein	mce1C	-	-	ko:K02067	ko02010,map02010	M00210,M00669,M00670	-	-	ko00000,ko00001,ko00002,ko02000	3.A.1.27	-	-	Mce4_CUP1,MlaD
lcl|NC_009525.1_cds_WP_003899841.1_184	419947.MRA_0181	1.76e-278	761.0	COG1463@1|root,COG1463@2|Bacteria,2GJVB@201174|Actinobacteria,233HJ@1762|Mycobacteriaceae	201174|Actinobacteria	Q	Virulence factor Mce family protein	lprK	-	-	ko:K02067	ko02010,map02010	M00210,M00669,M00670	-	-	ko00000,ko00001,ko00002,ko02000	3.A.1.27	-	-	Mce4_CUP1,MlaD
lcl|NC_009525.1_cds_WP_003911095.1_185	419947.MRA_0182	0.0	1018.0	COG1463@1|root,COG1463@2|Bacteria,2GNEP@201174|Actinobacteria,232GJ@1762|Mycobacteriaceae	201174|Actinobacteria	Q	Virulence factor Mce family protein	mce1F	-	-	ko:K02067	ko02010,map02010	M00210,M00669,M00670	-	-	ko00000,ko00001,ko00002,ko02000	3.A.1.27	-	-	Mce4_CUP1,MlaD
lcl|NC_009525.1_cds_WP_003899845.1_190	419947.MRA_0187	7.36e-274	748.0	2F81I@1|root,340F0@2|Bacteria,2I90N@201174|Actinobacteria,233B5@1762|Mycobacteriaceae	201174|Actinobacteria	S	Phosphodiester glycosidase	lprO	-	-	-	-	-	-	-	-	-	-	-	NAGPA
lcl|NC_009525.1_cds_WP_003899846.1_191	419947.MRA_0188	1.85e-300	822.0	COG1511@1|root,COG1511@2|Bacteria,2HND7@201174|Actinobacteria,2360U@1762|Mycobacteriaceae	201174|Actinobacteria	S	Protein of unknown function (DUF3533)	-	-	-	-	-	-	-	-	-	-	-	-	DUF3533
lcl|NC_009525.1_cds_WP_003401120.1_196	419947.MRA_0193	2.96e-121	345.0	2DPFG@1|root,331UX@2|Bacteria,2IG6V@201174|Actinobacteria,238SR@1762|Mycobacteriaceae	201174|Actinobacteria	-	-	-	-	-	-	-	-	-	-	-	-	-	-	-
lcl|NC_009525.1_cds_WP_011961605.1_201	419947.MRA_0197	0.0	1113.0	COG0129@1|root,COG0129@2|Bacteria,2GJIJ@201174|Actinobacteria,233VR@1762|Mycobacteriaceae	201174|Actinobacteria	E	Belongs to the ILVD EDD family	ilvD	GO:0003674,GO:0003824,GO:0004160,GO:0005575,GO:0005623,GO:0005886,GO:0006082,GO:0006520,GO:0006807,GO:0008150,GO:0008152,GO:0008652,GO:0009058,GO:0009081,GO:0009082,GO:0009987,GO:0016020,GO:0016053,GO:0016829,GO:0016835,GO:0016836,GO:0019752,GO:0040007,GO:0043436,GO:0044237,GO:0044238,GO:0044249,GO:0044281,GO:0044283,GO:0044464,GO:0046394,GO:0071704,GO:0071944,GO:1901564,GO:1901566,GO:1901576	4.2.1.9	ko:K01687	ko00290,ko00770,ko01100,ko01110,ko01130,ko01210,ko01230,map00290,map00770,map01100,map01110,map01130,map01210,map01230	M00019,M00570	R01209,R04441,R05070	RC00468,RC01714	ko00000,ko00001,ko00002,ko01000	-	-	-	ILVD_EDD
lcl|NC_009525.1_cds_WP_003916225.1_204	419947.MRA_0200	8.42e-242	667.0	COG1376@1|root,COG1376@2|Bacteria,2I22H@201174|Actinobacteria,234BN@1762|Mycobacteriaceae	201174|Actinobacteria	S	ErfK YbiS YcfS YnhG family protein	-	GO:0005575,GO:0005576	-	-	-	-	-	-	-	-	-	-	YkuD
lcl|NC_009525.1_cds_WP_003916226.1_205	419947.MRA_0201	0.0	1229.0	2EIH2@1|root,33PXJ@2|Bacteria,2IF64@201174|Actinobacteria,235NG@1762|Mycobacteriaceae	201174|Actinobacteria	-	-	-	-	-	-	-	-	-	-	-	-	-	-	-
lcl|NC_009525.1_cds_WP_003911097.1_206	419947.MRA_0202	0.0	2264.0	COG1132@1|root,COG1132@2|Bacteria,2GITR@201174|Actinobacteria,2357B@1762|Mycobacteriaceae	201174|Actinobacteria	V	ABC transporter	-	GO:0003674,GO:0003824,GO:0005215,GO:0005319,GO:0005575,GO:0005618,GO:0005623,GO:0005886,GO:0006810,GO:0006869,GO:0008150,GO:0010876,GO:0015399,GO:0015405,GO:0015562,GO:0015893,GO:0016020,GO:0016462,GO:0016787,GO:0016817,GO:0016818,GO:0016887,GO:0017111,GO:0022804,GO:0022857,GO:0030312,GO:0033036,GO:0034040,GO:0042221,GO:0042493,GO:0042623,GO:0042626,GO:0042891,GO:0043492,GO:0044464,GO:0050896,GO:…	-	ko:K06147,ko:K18894	ko02010,map02010	-	-	-	ko00000,ko00001,ko02000	3.A.1.106,3.A.1.106.6,3.A.1.109,3.A.1.21	-	-	ABC_membrane,ABC_tran
lcl|NC_009525.1_cds_WP_003901824.1_207	419947.MRA_0203	2.92e-144	407.0	COG2197@1|root,COG2197@2|Bacteria,2GNUE@201174|Actinobacteria,237D0@1762|Mycobacteriaceae	201174|Actinobacteria	K	Bacterial regulatory proteins, luxR family	-	-	-	-	-	-	-	-	-	-	-	-	GerE
lcl|NC_009525.1_cds_WP_003401168.1_208	419947.MRA_0204	8.86e-133	377.0	COG1309@1|root,COG1309@2|Bacteria,2HR0A@201174|Actinobacteria,238YC@1762|Mycobacteriaceae	201174|Actinobacteria	K	Transcriptional regulator	-	GO:0000976,GO:0001067,GO:0003674,GO:0003676,GO:0003677,GO:0003690,GO:0003700,GO:0005488,GO:0005575,GO:0005622,GO:0005623,GO:0005737,GO:0005829,GO:0006355,GO:0008150,GO:0009889,GO:0010468,GO:0010556,GO:0019219,GO:0019222,GO:0031323,GO:0031326,GO:0043565,GO:0044212,GO:0044424,GO:0044444,GO:0044464,GO:0050789,GO:0050794,GO:0051171,GO:0051252,GO:0060255,GO:0065007,GO:0080090,GO:0097159,GO:0140110,GO:…	-	-	-	-	-	-	-	-	-	-	TetR_C_13,TetR_N
lcl|NC_009525.1_cds_WP_003913548.1_209	419947.MRA_0205	0.0	1491.0	COG0243@1|root,COG0243@2|Bacteria,2GNYQ@201174|Actinobacteria,232Y5@1762|Mycobacteriaceae	201174|Actinobacteria	C	Belongs to the prokaryotic molybdopterin-containing oxidoreductase family	-	-	1.17.1.9	ko:K00122	ko00630,ko00680,ko01100,ko01120,ko01200,map00630,map00680,map01100,map01120,map01200	-	R00519	RC02796	ko00000,ko00001,ko01000	-	-	-	Molybdop_Fe4S4,Molybdopterin,Molydop_binding
lcl|NC_009525.1_cds_WP_003899854.1_217	419947.MRA_0213	2.66e-234	648.0	COG0628@1|root,COG0628@2|Bacteria,2GK0H@201174|Actinobacteria,232X7@1762|Mycobacteriaceae	201174|Actinobacteria	S	AI-2E family transporter	-	GO:0003674,GO:0005215,GO:0005575,GO:0005623,GO:0005886,GO:0005887,GO:0006810,GO:0008150,GO:0016020,GO:0016021,GO:0031224,GO:0031226,GO:0040007,GO:0044425,GO:0044459,GO:0044464,GO:0051179,GO:0051234,GO:0055085,GO:0071944	-	ko:K20469	-	-	-	-	ko00000,ko02000	2.A.86.1.7	-	-	AI-2E_transport
lcl|NC_009525.1_cds_WP_003899855.1_218	419947.MRA_0214	0.0	1761.0	COG2409@1|root,COG2409@2|Bacteria,2GJ5A@201174|Actinobacteria,232RG@1762|Mycobacteriaceae	201174|Actinobacteria	S	lipid transport	mmpL3	GO:0005575,GO:0005576,GO:0005618,GO:0005623,GO:0005886,GO:0005887,GO:0006810,GO:0006869,GO:0008150,GO:0009273,GO:0009987,GO:0010876,GO:0015920,GO:0016020,GO:0016021,GO:0030312,GO:0031224,GO:0031226,GO:0033036,GO:0040007,GO:0042546,GO:0044085,GO:0044425,GO:0044459,GO:0044464,GO:0051179,GO:0051234,GO:0071554,GO:0071702,GO:0071766,GO:0071840,GO:0071944,GO:1901264	-	ko:K06994,ko:K20466,ko:K20470	-	-	-	-	ko00000,ko02000	2.A.6.5.5,2.A.6.5.6	-	-	DUF4190,MMPL
lcl|NC_009525.1_cds_WP_003401204.1_220	419947.MRA_0216	6.67e-194	537.0	COG0220@1|root,COG0220@2|Bacteria,2GJ8R@201174|Actinobacteria,234QK@1762|Mycobacteriaceae	201174|Actinobacteria	J	Catalyzes the formation of N(7)-methylguanine at position 46 (m7G46) in tRNA	trmB	GO:0001510,GO:0003674,GO:0003824,GO:0005575,GO:0005622,GO:0005623,GO:0005737,GO:0006139,GO:0006396,GO:0006399,GO:0006400,GO:0006725,GO:0006807,GO:0008033,GO:0008150,GO:0008152,GO:0008168,GO:0008173,GO:0008175,GO:0008176,GO:0008757,GO:0009451,GO:0009987,GO:0010467,GO:0016070,GO:0016423,GO:0016740,GO:0016741,GO:0030488,GO:0032259,GO:0032991,GO:0034470,GO:0034641,GO:0034660,GO:0034708,GO:0036265,GO:…	2.1.1.33	ko:K03439	-	-	-	-	ko00000,ko01000,ko03016	-	-	-	Methyltransf_4
lcl|NC_009525.1_cds_WP_003907228.1_221	419947.MRA_0217	4.58e-248	682.0	COG0699@1|root,COG0699@2|Bacteria,2ID47@201174|Actinobacteria,2363M@1762|Mycobacteriaceae	201174|Actinobacteria	S	ATPase. Has a role at an early stage in the morphogenesis of the spore coat	-	-	-	-	-	-	-	-	-	-	-	-	-
lcl|NC_009525.1_cds_WP_003899858.1_222	419947.MRA_0218	4.14e-315	863.0	COG1159@1|root,COG1159@2|Bacteria,2IIWJ@201174|Actinobacteria,234QR@1762|Mycobacteriaceae	201174|Actinobacteria	S	An essential GTPase that binds both GDP and GTP, with rapid nucleotide exchange. Plays a role in 16S rRNA processing and 30S ribosomal subunit biogenesis and possibly also in cell cycle regulation and energy metabolism	-	-	-	-	-	-	-	-	-	-	-	-	-
lcl|NC_009525.1_cds_WP_003401213.1_224	419947.MRA_0220	1.53e-245	672.0	COG1056@1|root,COG3172@1|root,COG1056@2|Bacteria,COG3172@2|Bacteria,2GXG6@201174|Actinobacteria,238EN@1762|Mycobacteriaceae	201174|Actinobacteria	H	AAA domain	nadR	-	-	-	-	-	-	-	-	-	-	-	AAA_28
lcl|NC_009525.1_cds_WP_003911129.1_225	419947.MRA_0221	0.0	865.0	COG1032@1|root,COG1032@2|Bacteria,2I8XZ@201174|Actinobacteria,234ZA@1762|Mycobacteriaceae	201174|Actinobacteria	C	Methyltransferase	-	-	-	ko:K18564	ko00332,ko01130,map00332,map01130	-	R10738	RC03266	ko00000,ko00001,ko01000	-	-	-	B12-binding,DUF4070,Radical_SAM
lcl|NC_009525.1_cds_WP_003911098.1_226	419947.MRA_0222	0.0	1039.0	COG0318@1|root,COG0318@2|Bacteria,2GJAA@201174|Actinobacteria,23466@1762|Mycobacteriaceae	201174|Actinobacteria	IQ	Activates fatty acids by binding to coenzyme A	fadD4	-	6.2.1.3	ko:K00666,ko:K01897	ko00061,ko00071,ko01100,ko01212,ko02024,ko03320,ko04146,ko04216,ko04714,ko04920,map00061,map00071,map01100,map01212,map02024,map03320,map04146,map04216,map04714,map04920	M00086	R01280	RC00004,RC00014	ko00000,ko00001,ko00002,ko01000,ko01004,ko04147	4.C.1.1	-	-	AMP-binding,AMP-binding_C
lcl|NC_009525.1_cds_WP_003900830.1_227	419947.MRA_0223	3.22e-257	706.0	COG1960@1|root,COG1960@2|Bacteria,2GIX8@201174|Actinobacteria,232B9@1762|Mycobacteriaceae	201174|Actinobacteria	I	acyl-CoA dehydrogenase	fadE3	-	1.3.8.1	ko:K00248	ko00071,ko00280,ko00650,ko01100,ko01110,ko01120,ko01200,ko01212,map00071,map00280,map00650,map01100,map01110,map01120,map01200,map01212	-	R01175,R01178,R02661,R03172,R04751	RC00052,RC00068,RC00076,RC00120,RC00148	ko00000,ko00001,ko01000	-	-	-	Acyl-CoA_dh_1,Acyl-CoA_dh_M,Acyl-CoA_dh_N
lcl|NC_009525.1_cds_WP_003401224.1_228	419947.MRA_0224	5.18e-251	687.0	COG2030@1|root,COG2030@2|Bacteria,2GKFH@201174|Actinobacteria,232XD@1762|Mycobacteriaceae	201174|Actinobacteria	I	Acyl dehydratase	-	-	-	-	-	-	-	-	-	-	-	-	-
lcl|NC_009525.1_cds_WP_003900831.1_229	419947.MRA_0225	5.81e-219	603.0	COG0657@1|root,COG0657@2|Bacteria,2GJYR@201174|Actinobacteria,232ZQ@1762|Mycobacteriaceae	201174|Actinobacteria	I	Alpha beta hydrolase	lipW	-	-	-	-	-	-	-	-	-	-	-	Abhydrolase_3
lcl|NC_009525.1_cds_WP_003911099.1_230	419947.MRA_0226	0.0	878.0	COG2041@1|root,COG2041@2|Bacteria,2GIZH@201174|Actinobacteria,235CZ@1762|Mycobacteriaceae	201174|Actinobacteria	S	Oxidoreductase molybdopterin binding	-	-	-	-	-	-	-	-	-	-	-	-	Oxidored_molyb
lcl|NC_009525.1_cds_WP_003401230.1_231	419947.MRA_0227	3.14e-127	362.0	2E339@1|root,32Y3E@2|Bacteria,2IJ6D@201174|Actinobacteria,239GZ@1762|Mycobacteriaceae	201174|Actinobacteria	-	-	-	-	-	-	-	-	-	-	-	-	-	-	-
lcl|NC_009525.1_cds_WP_016719572.1_239	419947.MRA_0235	2.34e-300	820.0	2B1K4@1|root,31U1J@2|Bacteria,2I8GP@201174|Actinobacteria,23299@1762|Mycobacteriaceae	201174|Actinobacteria	S	Protein of unknown function (DUF3068)	porA	-	-	-	-	-	-	-	-	-	-	-	DUF3068
lcl|NC_009525.1_cds_WP_003900835.1_243	419947.MRA_0238	6.48e-244	669.0	COG1735@1|root,COG1735@2|Bacteria,2GMZ6@201174|Actinobacteria,2360H@1762|Mycobacteriaceae	201174|Actinobacteria	S	Phosphotriesterase	php	-	-	ko:K07048	-	-	-	-	ko00000	-	-	-	PTE
lcl|NC_009525.1_cds_WP_003401265.1_244	419947.MRA_0239	0.0	1154.0	COG1960@1|root,COG1960@2|Bacteria,2GQPU@201174|Actinobacteria,235QM@1762|Mycobacteriaceae	201174|Actinobacteria	I	acyl-CoA dehydrogenase	fadE4	-	1.3.8.7	ko:K00249	ko00071,ko00280,ko00410,ko00640,ko01100,ko01110,ko01130,ko01200,ko01212,ko03320,map00071,map00280,map00410,map00640,map01100,map01110,map01130,map01200,map01212,map03320	M00013,M00036,M00087	R00924,R01175,R01279,R02661,R03172,R03777,R03857,R03990,R04095,R04432,R04751,R04754	RC00052,RC00068,RC00076,RC00095,RC00148,RC00246	ko00000,ko00001,ko00002,ko01000	-	-	-	Acyl-CoA_dh_1
lcl|NC_009525.1_cds_WP_003911100.1_246	419947.MRA_0241	1.7e-233	641.0	COG0208@1|root,COG0208@2|Bacteria,2GK48@201174|Actinobacteria,232PB@1762|Mycobacteriaceae	201174|Actinobacteria	F	ribonucleotide reductase	nrdB	GO:0003674,GO:0003824,GO:0005488,GO:0005506,GO:0005515,GO:0005575,GO:0005622,GO:0005623,GO:0005737,GO:0005829,GO:0008150,GO:0008152,GO:0016491,GO:0030145,GO:0042802,GO:0043167,GO:0043169,GO:0044424,GO:0044444,GO:0044464,GO:0046872,GO:0046914,GO:0055114	1.17.4.1	ko:K00526	ko00230,ko00240,ko01100,map00230,map00240,map01100	M00053	R02017,R02018,R02019,R02024	RC00613	ko00000,ko00001,ko00002,ko01000,ko03400	-	-	-	Ribonuc_red_sm
lcl|NC_009525.1_cds_WP_003911102.1_249	419947.MRA_0244	0.0	2732.0	COG4981@1|root,COG4981@2|Bacteria,2GMA5@201174|Actinobacteria,23374@1762|Mycobacteriaceae	201174|Actinobacteria	I	capsule organization	aftD	GO:0005575,GO:0005623,GO:0005886,GO:0008150,GO:0016020,GO:0040007,GO:0044464,GO:0071944	-	ko:K16648	-	-	-	-	ko00000,ko01000,ko01003	-	-	-	DUF3367,F5_F8_type_C
lcl|NC_009525.1_cds_WP_003401295.1_251	419947.MRA_0246	2.19e-271	743.0	COG1472@1|root,COG1472@2|Bacteria,2GM43@201174|Actinobacteria,234FC@1762|Mycobacteriaceae	201174|Actinobacteria	G	hydrolase, family 3	lpqI	-	3.2.1.52	ko:K01207	ko00520,ko00531,ko01100,ko01501,map00520,map00531,map01100,map01501	M00628	R00022,R05963,R07809,R07810,R10831	RC00049	ko00000,ko00001,ko00002,ko01000	-	-	-	Glyco_hydro_3
lcl|NC_009525.1_cds_WP_003900837.1_254	419947.MRA_0249	7.95e-103	297.0	COG1848@1|root,COG1848@2|Bacteria	2|Bacteria	G	Toxic component of a toxin-antitoxin (TA) module. An RNase	vapC	GO:0005575,GO:0005623,GO:0005886,GO:0016020,GO:0044464,GO:0071944	-	ko:K07064	-	-	-	-	ko00000	-	-	-	PIN
lcl|NC_009525.1_cds_WP_003899869.1_256	419947.MRA_0251	0.0	874.0	COG1028@1|root,COG1028@2|Bacteria,2GJCZ@201174|Actinobacteria,234SN@1762|Mycobacteriaceae	201174|Actinobacteria	IQ	Catalyzes the first of the two reduction steps in the elongation cycle of fatty acid synthesis	fabG	-	1.1.1.100	ko:K00059	ko00061,ko00333,ko00780,ko01040,ko01100,ko01130,ko01212,map00061,map00333,map00780,map01040,map01100,map01130,map01212	M00083,M00572	R04533,R04534,R04536,R04543,R04566,R04953,R04964,R07759,R07763,R10116,R10120,R11671	RC00029,RC00117	ko00000,ko00001,ko00002,ko01000,ko01004	-	-	-	adh_short_C2
lcl|NC_009525.1_cds_WP_003401317.1_260	419947.MRA_0255	5.19e-292	800.0	COG0477@1|root,34B3B@2|Bacteria,2IQS7@201174|Actinobacteria,23CS5@1762|Mycobacteriaceae	201174|Actinobacteria	EGP	Major facilitator Superfamily	-	-	-	-	-	-	-	-	-	-	-	-	-
lcl|NC_009525.1_cds_WP_003401336.1_266	419947.MRA_0261	0.0	1682.0	COG1251@1|root,COG1251@2|Bacteria,2GJ3U@201174|Actinobacteria,232Q6@1762|Mycobacteriaceae	201174|Actinobacteria	C	Belongs to the nitrite and sulfite reductase 4Fe-4S domain family	nirB	-	1.7.1.15	ko:K00362	ko00910,ko01120,map00910,map01120	M00530	R00787	RC00176	ko00000,ko00001,ko00002,ko01000	-	-	-	Fer2_BFD,NIR_SIR,NIR_SIR_ferr,Pyr_redox_2
lcl|NC_009525.1_cds_WP_003899877.1_269	419947.MRA_0264	0.0	981.0	COG1492@1|root,COG1492@2|Bacteria,2GJ1W@201174|Actinobacteria,232PX@1762|Mycobacteriaceae	201174|Actinobacteria	H	Catalyzes amidations at positions B, D, E, and G on adenosylcobyrinic A,C-diamide. NH(2) groups are provided by glutamine, and one molecule of ATP is hydrogenolyzed for each amidation	cobQ	-	6.3.5.10	ko:K02232	ko00860,ko01100,map00860,map01100	M00122	R05225	RC00010,RC01302	ko00000,ko00001,ko00002,ko01000	-	-	-	CbiA,GATase_3
lcl|NC_009525.1_cds_WP_003916613.1_273	419947.MRA_0267	7.11e-172	480.0	COG2138@1|root,COG2138@2|Bacteria,2GNJ0@201174|Actinobacteria,234VE@1762|Mycobacteriaceae	201174|Actinobacteria	S	cobalamin (vitamin B12) biosynthesis CbiX	cbiX	-	-	-	-	-	-	-	-	-	-	-	CbiX
lcl|NC_009525.1_cds_WP_003401357.1_274	419947.MRA_0268	1.88e-273	748.0	COG1587@1|root,COG3710@1|root,COG1587@2|Bacteria,COG3710@2|Bacteria,2GKMM@201174|Actinobacteria,235UV@1762|Mycobacteriaceae	201174|Actinobacteria	HK	Uroporphyrinogen-III synthase	hemD	-	4.2.1.75	ko:K01719	ko00860,ko01100,ko01110,ko01120,map00860,map01100,map01110,map01120	M00121	R03165	RC01861	ko00000,ko00001,ko00002,ko01000	-	-	-	HEM4,Trans_reg_C
lcl|NC_009525.1_cds_WP_003401360.1_275	419947.MRA_0269	0.0	915.0	COG2223@1|root,COG2223@2|Bacteria,2GJ1I@201174|Actinobacteria,232X0@1762|Mycobacteriaceae	201174|Actinobacteria	P	Major Facilitator	narK	-	-	ko:K02575	ko00910,map00910	M00615	-	-	ko00000,ko00001,ko00002,ko02000	2.A.1.8	-	iNJ661.Rv0261c,iNJ661.Rv0267	MFS_1
lcl|NC_009525.1_cds_WP_003899880.1_276	419947.MRA_0270	2.7e-132	374.0	COG0454@1|root,COG0456@2|Bacteria,2IAC7@201174|Actinobacteria,235DC@1762|Mycobacteriaceae	201174|Actinobacteria	K	Aminoglycoside 2'-N-acetyltransferase	aac	GO:0003674,GO:0003824,GO:0005575,GO:0005623,GO:0005886,GO:0008080,GO:0008150,GO:0008152,GO:0009056,GO:0009987,GO:0016020,GO:0016137,GO:0016139,GO:0016407,GO:0016410,GO:0016740,GO:0016746,GO:0016747,GO:0016999,GO:0017001,GO:0017144,GO:0030647,GO:0030649,GO:0034069,GO:0044237,GO:0044248,GO:0044464,GO:0047921,GO:0071704,GO:0071944,GO:1901135,GO:1901136,GO:1901575,GO:1901657,GO:1901658	2.3.1.59	ko:K17840	-	-	-	-	br01600,ko00000,ko01000,ko01504	-	-	-	Acetyltransf_1,Acetyltransf_9
lcl|NC_009525.1_cds_WP_003401367.1_277	419947.MRA_0271	1.88e-223	615.0	COG1984@1|root,COG1984@2|Bacteria,2GITH@201174|Actinobacteria,232JF@1762|Mycobacteriaceae	201174|Actinobacteria	E	Allophanate hydrolase subunit 2	-	-	-	-	-	-	-	-	-	-	-	-	CT_A_B,CT_C_D
lcl|NC_009525.1_cds_WP_003401373.1_279	419947.MRA_0273	1.11e-237	653.0	COG0614@1|root,COG0614@2|Bacteria,2I1A6@201174|Actinobacteria,2353F@1762|Mycobacteriaceae	201174|Actinobacteria	P	Periplasmic binding protein	yhfQ	-	-	ko:K02016	ko02010,map02010	M00240	-	-	ko00000,ko00001,ko00002,ko02000	3.A.1.14	-	-	Peripla_BP_2
lcl|NC_009525.1_cds_WP_003899883.1_280	419947.MRA_0274	0.0	2383.0	COG0145@1|root,COG0146@1|root,COG0145@2|Bacteria,COG0146@2|Bacteria,2GIYE@201174|Actinobacteria,233I1@1762|Mycobacteriaceae	201174|Actinobacteria	EQ	Hydantoinase/oxoprolinase	oplA	-	3.5.2.14,3.5.2.9	ko:K01469,ko:K01473	ko00330,ko00480,ko01100,map00330,map00480,map01100	-	R00251,R03187	RC00553,RC00632	ko00000,ko00001,ko01000	-	-	iNJ661.Rv0266c	Hydant_A_N,Hydantoinase_A,Hydantoinase_B
lcl|NC_009525.1_cds_WP_003899884.1_285	419947.MRA_0278	0.0	1088.0	COG0318@1|root,COG0318@2|Bacteria,2GKDF@201174|Actinobacteria,233AM@1762|Mycobacteriaceae	201174|Actinobacteria	IQ	Activates fatty acids by binding to coenzyme A	fadD2	-	-	ko:K00666	-	-	-	-	ko00000,ko01000,ko01004	-	-	-	AMP-binding,AMP-binding_C
lcl|NC_009525.1_cds_WP_003401392.1_286	419947.MRA_0279	0.0	1421.0	COG1960@1|root,COG1960@2|Bacteria,2GKVN@201174|Actinobacteria,23585@1762|Mycobacteriaceae	201174|Actinobacteria	I	acyl-CoA dehydrogenase	fadE6	-	-	-	-	-	-	-	-	-	-	-	Acyl-CoA_dh_1,Acyl-CoA_dh_M,Acyl-CoA_dh_N
lcl|NC_009525.1_cds_WP_003401394.1_287	419947.MRA_0280	1.9e-280	765.0	COG1073@1|root,COG1073@2|Bacteria,2H0FD@201174|Actinobacteria,232Y8@1762|Mycobacteriaceae	201174|Actinobacteria	S	alpha beta	-	-	-	-	-	-	-	-	-	-	-	-	-
lcl|NC_009525.1_cds_WP_003899886.1_290	419947.MRA_0283	5.17e-162	454.0	COG1309@1|root,COG1309@2|Bacteria,2I8E9@201174|Actinobacteria,235X8@1762|Mycobacteriaceae	201174|Actinobacteria	K	Transcriptional regulator	-	-	-	-	-	-	-	-	-	-	-	-	TetR_N
lcl|NC_009525.1_cds_WP_011961609.1_295	419947.MRA_0288	1.15e-67	248.0	COG0657@1|root,COG0657@2|Bacteria	2|Bacteria	I	acetylesterase activity	-	-	3.1.1.3	ko:K01046	ko00561,ko01100,map00561,map01100	M00098	R02250,R02687	RC00020,RC00037,RC00041,RC00094	ko00000,ko00001,ko00002,ko01000	-	-	-	Abhydrolase_3,PE
lcl|NC_009525.1_cds_WP_010886073.1_296	419947.MRA_0289	4.82e-283	785.0	COG5651@1|root,COG5651@2|Bacteria,2GN0X@201174|Actinobacteria,235QZ@1762|Mycobacteriaceae	201174|Actinobacteria	N	PPE family	-	-	-	-	-	-	-	-	-	-	-	-	PPE
lcl|NC_009525.1_cds_WP_003401448.1_297	419947.MRA_0290	1.49e-221	610.0	COG3315@1|root,COG3315@2|Bacteria,2GKDZ@201174|Actinobacteria,232W9@1762|Mycobacteriaceae	201174|Actinobacteria	Q	Exhibits S-adenosyl-L-methionine-dependent methyltransferase activity	-	GO:0005575,GO:0005623,GO:0005886,GO:0016020,GO:0044464,GO:0071944	-	-	-	-	-	-	-	-	-	-	LCM
lcl|NC_009525.1_cds_WP_003916637.1_300	419947.MRA_0293	0.0	2630.0	COG1672@1|root,COG1674@1|root,COG1672@2|Bacteria,COG1674@2|Bacteria,2GJBR@201174|Actinobacteria,232Q4@1762|Mycobacteriaceae	201174|Actinobacteria	D	COG1674 DNA segregation ATPase FtsK SpoIIIE and related proteins	eccCa	GO:0005575,GO:0005618,GO:0005623,GO:0005886,GO:0005887,GO:0008150,GO:0016020,GO:0016021,GO:0030312,GO:0031224,GO:0031226,GO:0040007,GO:0044425,GO:0044459,GO:0044464,GO:0071944	-	ko:K03466	-	-	-	-	ko00000,ko03036	3.A.12	-	-	FtsK_SpoIIIE
lcl|NC_009525.1_cds_WP_003401488.1_302	83332.Rv0286	1.77e-292	807.0	COG5651@1|root,COG5651@2|Bacteria,2GKJ3@201174|Actinobacteria,234AM@1762|Mycobacteriaceae	201174|Actinobacteria	N	PPE family	-	GO:0008150,GO:0040007	-	-	-	-	-	-	-	-	-	-	PPE
lcl|NC_009525.1_cds_WP_003401524.1_306	419947.MRA_0299	1.35e-303	832.0	2B6TZ@1|root,31ZT8@2|Bacteria,2I12A@201174|Actinobacteria,234YN@1762|Mycobacteriaceae	201174|Actinobacteria	S	Type VII secretion integral membrane protein EccD	snm_2	GO:0005575,GO:0005618,GO:0005623,GO:0005886,GO:0005887,GO:0008150,GO:0016020,GO:0016021,GO:0030312,GO:0031224,GO:0031226,GO:0040007,GO:0044425,GO:0044459,GO:0044464,GO:0071944	-	-	-	-	-	-	-	-	-	-	YukD
lcl|NC_009525.1_cds_WP_003401528.1_307	419947.MRA_0300	0.0	878.0	COG1404@1|root,COG1404@2|Bacteria,2GIRE@201174|Actinobacteria,234HB@1762|Mycobacteriaceae	201174|Actinobacteria	O	Peptidase S8	mycP3	GO:0005575,GO:0005576,GO:0005618,GO:0005623,GO:0005886,GO:0005887,GO:0008150,GO:0016020,GO:0016021,GO:0030312,GO:0031224,GO:0031226,GO:0040007,GO:0044425,GO:0044459,GO:0044464,GO:0071944	-	ko:K14743	-	-	-	-	ko00000,ko01000,ko01002,ko03110	-	-	-	Peptidase_S8
lcl|NC_009525.1_cds_WP_003916638.1_308	419947.MRA_0301	3.78e-225	622.0	2AP0J@1|root,31E1N@2|Bacteria,2IBR4@201174|Actinobacteria,235Z9@1762|Mycobacteriaceae	201174|Actinobacteria	S	Putative type VII ESX secretion system translocon, EccE	eccE3	GO:0005575,GO:0005618,GO:0005623,GO:0005886,GO:0005887,GO:0008150,GO:0016020,GO:0016021,GO:0030312,GO:0031224,GO:0031226,GO:0040007,GO:0044425,GO:0044459,GO:0044464,GO:0071944	-	-	-	-	-	-	-	-	-	-	EccE
lcl|NC_009525.1_cds_WP_003898396.1_309	419947.MRA_0302	1.61e-295	805.0	COG1073@1|root,COG1073@2|Bacteria,2GVYQ@201174|Actinobacteria,2331G@1762|Mycobacteriaceae	201174|Actinobacteria	S	alpha beta	-	-	-	-	-	-	-	-	-	-	-	-	Abhydrolase_1,Peptidase_S9
lcl|NC_009525.1_cds_WP_003401538.1_310	419947.MRA_0303	1.78e-197	546.0	COG4106@1|root,COG4106@2|Bacteria,2GJMG@201174|Actinobacteria,2350R@1762|Mycobacteriaceae	201174|Actinobacteria	J	Catalyzes the S-adenosylmethionine monomethyl esterification of trans-aconitate	tam	GO:0003674,GO:0003824,GO:0005575,GO:0005622,GO:0005623,GO:0005737,GO:0008150,GO:0008152,GO:0008168,GO:0008757,GO:0016740,GO:0016741,GO:0032259,GO:0040007,GO:0044110,GO:0044116,GO:0044117,GO:0044119,GO:0044403,GO:0044419,GO:0044424,GO:0044464,GO:0051704	2.1.1.144	ko:K00598	-	-	-	-	ko00000,ko01000	-	-	-	Methyltransf_23,Methyltransf_25
lcl|NC_009525.1_cds_WP_010886074.1_313	419947.MRA_0306	3.2e-61	220.0	COG3391@1|root,COG3391@2|Bacteria	2|Bacteria	CO	amine dehydrogenase activity	-	-	-	-	-	-	-	-	-	-	-	-	HYR,HtaA,NHL,Neocarzinostat,PE
lcl|NC_009525.1_cds_WP_003401566.1_317	419947.MRA_0310	5.23e-97	282.0	COG1487@1|root,COG1487@2|Bacteria,2IMGJ@201174|Actinobacteria,23ADN@1762|Mycobacteriaceae	201174|Actinobacteria	S	Toxic component of a toxin-antitoxin (TA) module. An RNase	-	GO:0003674,GO:0003824,GO:0004518,GO:0004540,GO:0006139,GO:0006417,GO:0006725,GO:0006807,GO:0008150,GO:0008152,GO:0009889,GO:0009890,GO:0009892,GO:0009987,GO:0010468,GO:0010556,GO:0010558,GO:0010605,GO:0010608,GO:0010629,GO:0016070,GO:0016787,GO:0016788,GO:0017148,GO:0019222,GO:0031323,GO:0031324,GO:0031326,GO:0031327,GO:0032268,GO:0032269,GO:0034248,GO:0034249,GO:0034641,GO:0043170,GO:0044237,GO:…	-	-	-	-	-	-	-	-	-	-	PIN
lcl|NC_009525.1_cds_WP_009935618.1_323	419947.MRA_0314	2.82e-253	743.0	COG5651@1|root,COG5651@2|Bacteria,2GU5G@201174|Actinobacteria,2381I@1762|Mycobacteriaceae	201174|Actinobacteria	N	Pentapeptide repeats (8 copies)	-	-	-	-	-	-	-	-	-	-	-	-	PPE,Pentapeptide_2
lcl|NC_009525.1_cds_WP_003401597.1_327	419947.MRA_0318	7.79e-157	439.0	COG3786@1|root,COG3786@2|Bacteria,2GNX8@201174|Actinobacteria,235TP@1762|Mycobacteriaceae	201174|Actinobacteria	S	protein conserved in bacteria	-	-	-	-	-	-	-	-	-	-	-	-	YkuD
lcl|NC_009525.1_cds_WP_003401601.1_328	419947.MRA_0319	1.04e-118	338.0	COG5517@1|root,COG5517@2|Bacteria,2IN5V@201174|Actinobacteria,235E3@1762|Mycobacteriaceae	201174|Actinobacteria	Q	SnoaL-like domain	baiE	-	-	-	-	-	-	-	-	-	-	-	SnoaL_4
lcl|NC_009525.1_cds_WP_003898398.1_329	419947.MRA_0320	1.58e-302	824.0	28KAT@1|root,2Z9XX@2|Bacteria,2GNVW@201174|Actinobacteria,2332X@1762|Mycobacteriaceae	201174|Actinobacteria	-	-	-	-	-	-	-	-	-	-	-	-	-	-	-
lcl|NC_009525.1_cds_WP_003900119.1_330	419947.MRA_0321	0.0	1038.0	COG0443@1|root,COG0443@2|Bacteria,2GNTE@201174|Actinobacteria,232QM@1762|Mycobacteriaceae	201174|Actinobacteria	O	Molecular chaperone	-	-	-	-	-	-	-	-	-	-	-	-	HSP70
lcl|NC_009525.1_cds_WP_003401613.1_331	419947.MRA_0322	5.66e-88	258.0	2F93U@1|root,341FE@2|Bacteria,2INFK@201174|Actinobacteria,239KR@1762|Mycobacteriaceae	201174|Actinobacteria	-	-	-	-	-	-	-	-	-	-	-	-	-	-	-
lcl|NC_009525.1_cds_WP_003911156.1_333	419947.MRA_0324	3.38e-223	613.0	COG2273@1|root,COG2273@2|Bacteria,2GJQP@201174|Actinobacteria,23390@1762|Mycobacteriaceae	201174|Actinobacteria	G	family 16	-	-	-	-	-	-	-	-	-	-	-	-	Glyco_hydro_16
lcl|NC_009525.1_cds_WP_009935711.1_336	419947.MRA_0327	2.16e-170	478.0	COG0428@1|root,COG0428@2|Bacteria,2HSPB@201174|Actinobacteria,237H9@1762|Mycobacteriaceae	201174|Actinobacteria	P	transporter	-	-	-	ko:K07238	-	-	-	-	ko00000,ko02000	2.A.5.5	-	-	Zip
lcl|NC_009525.1_cds_WP_003401632.1_337	419947.MRA_0328	1.83e-157	441.0	COG2039@1|root,COG2039@2|Bacteria,2GN39@201174|Actinobacteria,235KE@1762|Mycobacteriaceae	201174|Actinobacteria	J	Removes 5-oxoproline from various penultimate amino acid residues except L-proline	pcp	GO:0006508,GO:0006807,GO:0008150,GO:0008152,GO:0019538,GO:0043170,GO:0044238,GO:0071704,GO:1901564	3.4.19.3	ko:K01304	-	-	-	-	ko00000,ko01000,ko01002	-	-	-	Peptidase_C15
lcl|NC_009525.1_cds_WP_003898399.1_339	419947.MRA_0330	4.09e-136	385.0	COG0717@1|root,COG0717@2|Bacteria,2GKQQ@201174|Actinobacteria,235VU@1762|Mycobacteriaceae	201174|Actinobacteria	F	Belongs to the dCTP deaminase family	dcd	GO:0003674,GO:0003824,GO:0004170,GO:0016462,GO:0016787,GO:0016810,GO:0016814,GO:0016817,GO:0016818,GO:0019239,GO:0033973,GO:0047429	3.5.4.13	ko:K01494	ko00240,ko01100,map00240,map01100	M00053	R00568,R02325	RC00074	ko00000,ko00001,ko00002,ko01000	-	-	-	DCD
lcl|NC_009525.1_cds_WP_003898400.1_340	419947.MRA_0331	0.0	873.0	COG1004@1|root,COG1004@2|Bacteria,2GJQB@201174|Actinobacteria,232G8@1762|Mycobacteriaceae	201174|Actinobacteria	M	Belongs to the UDP-glucose GDP-mannose dehydrogenase family	ugd	-	1.1.1.22	ko:K00012	ko00040,ko00053,ko00520,ko01100,map00040,map00053,map00520,map01100	M00014,M00129,M00361,M00362	R00286	RC00291	ko00000,ko00001,ko00002,ko01000	-	-	-	UDPG_MGDP_dh,UDPG_MGDP_dh_C,UDPG_MGDP_dh_N
lcl|NC_009525.1_cds_WP_003906339.1_342	419947.MRA_0333	8e-154	432.0	COG0607@1|root,COG0640@1|root,COG0607@2|Bacteria,COG0640@2|Bacteria,2I98A@201174|Actinobacteria,23999@1762|Mycobacteriaceae	201174|Actinobacteria	K	Rhodanese-like domain	-	-	-	-	-	-	-	-	-	-	-	-	HTH_20,HTH_5,Rhodanese
lcl|NC_009525.1_cds_WP_015456122.1_343	419947.MRA_0334	4.32e-42	137.0	COG0500@1|root,COG2226@2|Bacteria	2|Bacteria	Q	methyltransferase	-	-	-	-	-	-	-	-	-	-	-	-	Methyltransf_11,Methyltransf_23,Methyltransf_25
lcl|NC_009525.1_cds_WP_003898402.1_344	419947.MRA_0335	5.51e-106	305.0	COG0500@1|root,COG2226@2|Bacteria,2GKVB@201174|Actinobacteria,23DFM@1762|Mycobacteriaceae	201174|Actinobacteria	Q	Methyltransferase domain	-	-	-	-	-	-	-	-	-	-	-	-	Methyltransf_25
lcl|NC_009525.1_cds_WP_003401656.1_348	419947.MRA_0339	1.74e-167	469.0	COG1309@1|root,COG1309@2|Bacteria,2IIIS@201174|Actinobacteria,23DK1@1762|Mycobacteriaceae	201174|Actinobacteria	K	Bacterial regulatory proteins, tetR family	-	-	-	-	-	-	-	-	-	-	-	-	TetR_N
lcl|NC_009525.1_cds_WP_003900904.1_349	419947.MRA_0340	4.5e-280	765.0	COG0446@1|root,COG0446@2|Bacteria,2GRTN@201174|Actinobacteria,233P7@1762|Mycobacteriaceae	201174|Actinobacteria	S	Pyridine nucleotide-disulphide oxidoreductase	-	-	1.8.5.4	ko:K17218	ko00920,map00920	-	R10152	RC03155	ko00000,ko00001,ko01000	-	-	-	DsrC,Pyr_redox_2
lcl|NC_009525.1_cds_WP_003911158.1_350	419947.MRA_0341	1.81e-192	533.0	COG3550@1|root,COG3550@2|Bacteria,2GJ1X@201174|Actinobacteria,233HZ@1762|Mycobacteriaceae	201174|Actinobacteria	S	MDMPI C-terminal domain	-	-	-	-	-	-	-	-	-	-	-	-	MDMPI_C,MDMPI_N
lcl|NC_009525.1_cds_WP_003900122.1_354	419947.MRA_0345	0.0	995.0	COG1403@1|root,COG1403@2|Bacteria,2GP2N@201174|Actinobacteria,232ST@1762|Mycobacteriaceae	201174|Actinobacteria	V	HNH endonuclease	-	-	-	-	-	-	-	-	-	-	-	-	DUF222,HNH
lcl|NC_009525.1_cds_WP_003916653.1_356	419947.MRA_0347	0.0	1609.0	COG0247@1|root,COG3266@1|root,COG0247@2|Bacteria,COG3266@2|Bacteria,2GJ7M@201174|Actinobacteria,232WS@1762|Mycobacteriaceae	201174|Actinobacteria	C	Fe-S oxidoreductase	-	-	-	-	-	-	-	-	-	-	-	-	CCG,Fer4_8
lcl|NC_009525.1_cds_WP_003401735.1_357	419947.MRA_0348	0.0	1519.0	COG2771@1|root,COG2771@2|Bacteria,2I2NT@201174|Actinobacteria,234EM@1762|Mycobacteriaceae	201174|Actinobacteria	K	Transcriptional regulator	gerE	-	-	-	-	-	-	-	-	-	-	-	GerE
lcl|NC_009525.1_cds_WP_003901837.1_359	419947.MRA_0350	1.04e-248	694.0	2DNCF@1|root,32WSK@2|Bacteria,2GP5B@201174|Actinobacteria,236FX@1762|Mycobacteriaceae	201174|Actinobacteria	-	-	iniB	-	-	-	-	-	-	-	-	-	-	-	-
lcl|NC_009525.1_cds_WP_003911164.1_360	419947.MRA_0351	0.0	1172.0	COG0699@1|root,COG0699@2|Bacteria,2GNGP@201174|Actinobacteria,233R2@1762|Mycobacteriaceae	201174|Actinobacteria	S	Dynamin family	iniA	GO:0003674,GO:0005215,GO:0005575,GO:0005618,GO:0005623,GO:0005886,GO:0006810,GO:0008150,GO:0015562,GO:0016020,GO:0022857,GO:0030312,GO:0044464,GO:0051179,GO:0051234,GO:0055085,GO:0071944	-	-	-	-	-	-	-	-	-	-	Dynamin_N
lcl|NC_009525.1_cds_MRA_RS01830_363	419947.MRA_0354	1.16e-89	263.0	COG2068@1|root,COG2068@2|Bacteria,2GK5R@201174|Actinobacteria,239GU@1762|Mycobacteriaceae	201174|Actinobacteria	S	MobA-like NTP transferase domain	nboR	-	1.1.1.328,2.7.7.76	ko:K07141,ko:K19190	ko00760,ko00790,ko01120,map00760,map00790,map01120	-	R10131,R10132,R11582	RC03053	ko00000,ko00001,ko01000	-	-	-	NTP_transf_3
lcl|NC_009525.1_cds_WP_003898409.1_364	419947.MRA_0355	0.0	936.0	COG1113@1|root,COG1113@2|Bacteria,2GJ0X@201174|Actinobacteria,234JB@1762|Mycobacteriaceae	201174|Actinobacteria	E	permease	ansP	GO:0005575,GO:0005576	-	ko:K11738	-	-	-	-	ko00000,ko02000	2.A.3.1.8	-	iNJ661.Rv0346c	AA_permease
lcl|NC_009525.1_cds_WP_003401814.1_369	419947.MRA_0359	0.0	1134.0	COG0443@1|root,COG0443@2|Bacteria,2GJTY@201174|Actinobacteria,2339Q@1762|Mycobacteriaceae	201174|Actinobacteria	O	Heat shock 70 kDa protein	dnaK	GO:0000302,GO:0000303,GO:0000305,GO:0001968,GO:0003674,GO:0005488,GO:0005515,GO:0005575,GO:0005576,GO:0005618,GO:0005622,GO:0005623,GO:0005737,GO:0005829,GO:0005886,GO:0006464,GO:0006468,GO:0006793,GO:0006796,GO:0006807,GO:0006950,GO:0006979,GO:0008150,GO:0008152,GO:0009266,GO:0009408,GO:0009628,GO:0009893,GO:0009987,GO:0010035,GO:0010038,GO:0010468,GO:0010604,GO:0010628,GO:0010755,GO:0010756,GO:…	-	ko:K04043	ko03018,ko04212,ko05152,map03018,map04212,map05152	-	-	-	ko00000,ko00001,ko03019,ko03029,ko03110,ko04147	1.A.33.1	-	-	HSP70
lcl|NC_009525.1_cds_WP_003401817.1_370	419947.MRA_0360	4.68e-146	414.0	COG0576@1|root,COG0576@2|Bacteria,2GP4F@201174|Actinobacteria,234P7@1762|Mycobacteriaceae	201174|Actinobacteria	O	Participates actively in the response to hyperosmotic and heat shock by preventing the aggregation of stress-denatured proteins, in association with DnaK and GrpE. It is the nucleotide exchange factor for DnaK and may function as a thermosensor. Unfolded proteins bind initially to DnaJ	grpE	GO:0000166,GO:0000774,GO:0003674,GO:0005488,GO:0005515,GO:0005575,GO:0005618,GO:0005623,GO:0006950,GO:0007154,GO:0008150,GO:0009267,GO:0009605,GO:0009987,GO:0009991,GO:0017076,GO:0030234,GO:0030312,GO:0030554,GO:0031667,GO:0031668,GO:0031669,GO:0033554,GO:0036094,GO:0040007,GO:0042594,GO:0044464,GO:0050790,GO:0050896,GO:0051082,GO:0051716,GO:0060589,GO:0060590,GO:0065007,GO:0065009,GO:0071496,GO:…	-	ko:K03687	-	-	-	-	ko00000,ko03029,ko03110	-	-	-	GrpE
lcl|NC_009525.1_cds_WP_003401821.1_371	419947.MRA_0361	7.15e-260	715.0	COG0484@1|root,COG0484@2|Bacteria,2GJKK@201174|Actinobacteria,233BG@1762|Mycobacteriaceae	201174|Actinobacteria	O	ATP binding to DnaK triggers the release of the substrate protein, thus completing the reaction cycle. Several rounds of ATP-dependent interactions between DnaJ, DnaK and GrpE are required for fully efficient folding. Also involved, together with DnaK and GrpE, in the DNA replication of plasmids through activation of initiation proteins	dnaJ	GO:0005575,GO:0005618,GO:0005623,GO:0005886,GO:0008150,GO:0010468,GO:0016020,GO:0019222,GO:0030312,GO:0040007,GO:0043388,GO:0044093,GO:0044464,GO:0050789,GO:0051098,GO:0051099,GO:0051101,GO:0060255,GO:0065007,GO:0065009,GO:0071944,GO:2000677,GO:2000679	-	ko:K03686,ko:K05516	-	-	-	-	ko00000,ko03029,ko03036,ko03110	-	-	-	DnaJ,DnaJ_C,DnaJ_CXXCXGXG
lcl|NC_009525.1_cds_WP_003916655.1_374	419947.MRA_0364	0.0	1854.0	COG1357@1|root,COG5651@1|root,COG1357@2|Bacteria,COG5651@2|Bacteria,2ICRT@201174|Actinobacteria,238G1@1762|Mycobacteriaceae	201174|Actinobacteria	N	Pentapeptide repeats (8 copies)	-	-	-	-	-	-	-	-	-	-	-	-	PPE,Pentapeptide_2
lcl|NC_009525.1_cds_WP_003898413.1_378	419947.MRA_0368	1.14e-183	511.0	COG1994@1|root,COG1994@2|Bacteria,2GM8E@201174|Actinobacteria,233KC@1762|Mycobacteriaceae	201174|Actinobacteria	S	Peptidase M50	rip2	-	-	-	-	-	-	-	-	-	-	-	Peptidase_M50
lcl|NC_009525.1_cds_WP_003898415.1_381	419947.MRA_0371	8.21e-292	801.0	COG2239@1|root,COG2239@2|Bacteria,2GMMK@201174|Actinobacteria,236XQ@1762|Mycobacteriaceae	201174|Actinobacteria	P	Acts as a magnesium transporter	mgtE	-	-	ko:K06213	-	-	-	-	ko00000,ko02000	1.A.26.1	-	-	CBS,MgtE,MgtE_N,PRC
lcl|NC_009525.1_cds_WP_003906353.1_387	419947.MRA_0377	7.02e-287	784.0	COG3552@1|root,COG3552@2|Bacteria,2GNTS@201174|Actinobacteria,2359Z@1762|Mycobacteriaceae	201174|Actinobacteria	S	VWA containing CoxE family protein	-	-	-	ko:K07161	-	-	-	-	ko00000	-	-	-	VWA_CoxE
lcl|NC_009525.1_cds_WP_003898418.1_389	419947.MRA_0379	4.57e-214	591.0	COG0714@1|root,COG0714@2|Bacteria,2GMM2@201174|Actinobacteria,2354V@1762|Mycobacteriaceae	201174|Actinobacteria	S	AAA domain (dynein-related subfamily)	-	-	-	-	-	-	-	-	-	-	-	-	AAA,AAA_5
lcl|NC_009525.1_cds_WP_003900133.1_392	419947.MRA_0382	0.0	1610.0	COG1529@1|root,COG1529@2|Bacteria,2GIVI@201174|Actinobacteria,234AC@1762|Mycobacteriaceae	201174|Actinobacteria	C	aldehyde oxidase and xanthine dehydrogenase, a b hammerhead	coxL	-	1.2.5.3	ko:K03520	-	-	R11168	RC02800	ko00000,ko01000	-	-	-	Ald_Xan_dh_C,Ald_Xan_dh_C2
lcl|NC_009525.1_cds_WP_003900914.1_399	419947.MRA_0388	3.82e-157	440.0	COG0566@1|root,COG0566@2|Bacteria,2GM1A@201174|Actinobacteria,2330U@1762|Mycobacteriaceae	201174|Actinobacteria	J	tRNA rRNA methyltransferase, SpoU	trmH	-	2.1.1.34	ko:K00556	-	-	-	-	ko00000,ko01000,ko03016	-	-	-	SpoU_methylase
lcl|NC_009525.1_cds_WP_003401912.1_405	419947.MRA_0394	0.0	1976.0	COG2114@1|root,COG2197@1|root,COG3903@1|root,COG2114@2|Bacteria,COG2197@2|Bacteria,COG3903@2|Bacteria,2GIZ1@201174|Actinobacteria,233DM@1762|Mycobacteriaceae	201174|Actinobacteria	K	involved in signal transduction (via phosphorylation) involved in transcriptional regulatory mechanism and in the regulation of secondary metabolites catalytic activity ATP a protein ADP a phosphoprotein	-	-	-	-	-	-	-	-	-	-	-	-	GerE,Guanylate_cyc,NB-ARC
lcl|NC_009525.1_cds_WP_003898427.1_407	419947.MRA_0396	7.98e-292	798.0	COG0027@1|root,COG0027@2|Bacteria,2GMCS@201174|Actinobacteria,234HD@1762|Mycobacteriaceae	201174|Actinobacteria	F	Involved in the de novo purine biosynthesis. Catalyzes the transfer of formate to 5-phospho-ribosyl-glycinamide (GAR), producing 5-phospho-ribosyl-N-formylglycinamide (FGAR). Formate is provided by PurU via hydrolysis of 10-formyl-tetrahydrofolate	purT	GO:0003674,GO:0003824,GO:0005575,GO:0005622,GO:0005623,GO:0005737,GO:0005829,GO:0006793,GO:0006796,GO:0008150,GO:0008152,GO:0008776,GO:0009987,GO:0016301,GO:0016310,GO:0016740,GO:0016772,GO:0016774,GO:0044237,GO:0044424,GO:0044444,GO:0044464	2.1.2.2	ko:K08289	ko00230,ko00670,ko01100,ko01110,ko01130,map00230,map00670,map01100,map01110,map01130	M00048	R04325,R04326	RC00026,RC00197,RC01128	ko00000,ko00001,ko00002,ko01000	-	-	iNJ661.Rv0389	ATP-grasp,Epimerase
lcl|NC_009525.1_cds_WP_003898428.1_410	419947.MRA_0399	0.0	902.0	COG1252@1|root,COG1252@2|Bacteria,2GJFE@201174|Actinobacteria,23533@1762|Mycobacteriaceae	201174|Actinobacteria	C	Pyridine nucleotide-disulphide oxidoreductase	ndh	-	1.6.99.3	ko:K03885	ko00190,map00190	-	-	-	ko00000,ko00001,ko01000	-	-	-	Pyr_redox_2
lcl|NC_009525.1_cds_MRA_RS02060_411	1408452.JAGZ01000002_gene4625	7.02e-24	94.0	COG1403@1|root,COG1403@2|Bacteria,2GP2N@201174|Actinobacteria,232ST@1762|Mycobacteriaceae	201174|Actinobacteria	V	HNH endonuclease	-	-	-	-	-	-	-	-	-	-	-	-	DUF222,HNH
lcl|NC_009525.1_cds_WP_003916657.1_413	419947.MRA_0401A	6.48e-99	286.0	2BWWP@1|root,31KP3@2|Bacteria,2GTQK@201174|Actinobacteria,23BDI@1762|Mycobacteriaceae	201174|Actinobacteria	-	-	-	-	-	-	-	-	-	-	-	-	-	-	-
lcl|NC_009525.1_cds_MRA_RS02080_415	83332.Rv0397	5.21e-76	228.0	COG1403@1|root,COG1403@2|Bacteria,2GP2N@201174|Actinobacteria,232ST@1762|Mycobacteriaceae	201174|Actinobacteria	V	HNH endonuclease	-	GO:0005575,GO:0005618,GO:0005623,GO:0005886,GO:0016020,GO:0030312,GO:0044464,GO:0071944	-	-	-	-	-	-	-	-	-	-	DUF222,HNH
lcl|NC_009525.1_cds_WP_003898430.1_416	83332.Rv0397A	3.02e-57	177.0	2BB0I@1|root,324GJ@2|Bacteria,2H9CH@201174|Actinobacteria,23E8T@1762|Mycobacteriaceae	201174|Actinobacteria	-	-	-	-	-	-	-	-	-	-	-	-	-	-	-
lcl|NC_009525.1_cds_WP_003898432.1_418	419947.MRA_0405	8.74e-300	817.0	COG1680@1|root,COG1680@2|Bacteria,2GIX5@201174|Actinobacteria,2362T@1762|Mycobacteriaceae	201174|Actinobacteria	V	beta-lactamase	lpqK	-	-	-	-	-	-	-	-	-	-	-	Beta-lactamase
lcl|NC_009525.1_cds_WP_003401972.1_419	419947.MRA_0406	1.66e-290	792.0	COG1960@1|root,COG1960@2|Bacteria,2GIX8@201174|Actinobacteria,2336I@1762|Mycobacteriaceae	201174|Actinobacteria	I	acyl-CoA dehydrogenase	fadE7	-	1.3.8.6	ko:K00252	ko00071,ko00310,ko00362,ko00380,ko01100,ko01120,ko01130,map00071,map00310,map00362,map00380,map01100,map01120,map01130	M00032	R02487,R02488,R10074	RC00052,RC00156	ko00000,ko00001,ko00002,ko01000	-	-	-	Acyl-CoA_dh_1,Acyl-CoA_dh_M,Acyl-CoA_dh_N
lcl|NC_009525.1_cds_WP_003898435.1_421	419947.MRA_0408	0.0	1734.0	COG0642@1|root,COG2409@1|root,COG0642@2|Bacteria,COG2409@2|Bacteria,2IDHI@201174|Actinobacteria,235G9@1762|Mycobacteriaceae	201174|Actinobacteria	T	conserved transmembrane transport protein	mmpL1	GO:0005575,GO:0005576,GO:0005618,GO:0005623,GO:0005886,GO:0016020,GO:0030312,GO:0044464,GO:0071944	-	ko:K06994	-	-	-	-	ko00000	-	-	-	MMPL
lcl|NC_009525.1_cds_WP_003900139.1_423	419947.MRA_0410	0.0	1174.0	COG0318@1|root,COG0318@2|Bacteria,2H2CA@201174|Actinobacteria,23CB5@1762|Mycobacteriaceae	201174|Actinobacteria	F	Catalyzes the activation of long-chain fatty acids as acyl-adenylates (acyl-AMP), which are then transferred to the multifunctional polyketide synthase (PKS) for further chain extension	fadD30	GO:0002682,GO:0002684,GO:0003674,GO:0003824,GO:0005575,GO:0005623,GO:0005886,GO:0006082,GO:0006629,GO:0006631,GO:0006633,GO:0008150,GO:0008152,GO:0008610,GO:0009058,GO:0009273,GO:0009605,GO:0009607,GO:0009987,GO:0016020,GO:0016053,GO:0016740,GO:0016772,GO:0016779,GO:0016874,GO:0019752,GO:0032787,GO:0035821,GO:0040007,GO:0042546,GO:0043207,GO:0043436,GO:0044003,GO:0044085,GO:0044237,GO:0044238,GO:…	-	-	-	-	-	-	-	-	-	-	AMP-binding
lcl|NC_009525.1_cds_WP_003911169.1_424	419947.MRA_0411	0.0	2727.0	COG3319@1|root,COG3321@1|root,COG3319@2|Bacteria,COG3321@2|Bacteria,2H477@201174|Actinobacteria,23C8W@1762|Mycobacteriaceae	201174|Actinobacteria	Q	Thioesterase domain	pks6	-	2.3.1.111,2.3.1.252	ko:K11628,ko:K12431,ko:K12432,ko:K12433,ko:K12442,ko:K12443	-	-	R05189,R11450,R11451	RC00039,RC03439	ko00000,ko01000,ko01004	-	-	iNJ661.Rv2934	ADH_N,ADH_zinc_N,Acyl_transf_1,Condensation,KAsynt_C_assoc,KR,Ketoacyl-synt_C,PP-binding,PS-DH,Thioesterase,ketoacyl-synt
lcl|NC_009525.1_cds_WP_003911199.1_425	419947.MRA_0412	7.16e-186	516.0	COG0491@1|root,COG0491@2|Bacteria,2H8JM@201174|Actinobacteria,232EN@1762|Mycobacteriaceae	201174|Actinobacteria	S	beta-lactamase	-	-	-	-	-	-	-	-	-	-	-	-	Lactamase_B
lcl|NC_009525.1_cds_WP_003898438.1_426	419947.MRA_0413	2.28e-249	683.0	COG2141@1|root,COG2141@2|Bacteria,2GM94@201174|Actinobacteria,234JH@1762|Mycobacteriaceae	201174|Actinobacteria	C	Catalyzes the coenzyme F420-dependent oxidation of glucose 6-phosphate (G6P) to 6-phosphogluconolactone. Appears to have a role in resistance to oxidative stress, via its consumption of G6P that serves as a source of reducing power to combat oxidative stress in mycobacteria	fgd	GO:0003674,GO:0003824,GO:0005488,GO:0005515,GO:0005575,GO:0005618,GO:0005622,GO:0005623,GO:0005737,GO:0005829,GO:0005886,GO:0008150,GO:0008152,GO:0009987,GO:0016020,GO:0016491,GO:0016614,GO:0019725,GO:0030312,GO:0031406,GO:0036094,GO:0042592,GO:0042802,GO:0042803,GO:0043167,GO:0043168,GO:0043177,GO:0044424,GO:0044444,GO:0044464,GO:0045454,GO:0046983,GO:0048037,GO:0050662,GO:0050789,GO:0050794,GO:…	1.1.98.2	ko:K15510	-	-	-	-	ko00000,ko01000	-	-	-	Bac_luciferase
lcl|NC_009525.1_cds_WP_003898439.1_427	419947.MRA_0414	0.0	1308.0	COG0280@1|root,COG0857@1|root,COG0280@2|Bacteria,COG0857@2|Bacteria,2GJ5U@201174|Actinobacteria,234RB@1762|Mycobacteriaceae	201174|Actinobacteria	C	belongs to the CobB CobQ family	pta	GO:0005575,GO:0005576	2.3.1.8	ko:K13788	ko00430,ko00620,ko00640,ko00680,ko00720,ko01100,ko01120,ko01200,map00430,map00620,map00640,map00680,map00720,map01100,map01120,map01200	M00357,M00579	R00230,R00921	RC00004,RC02746,RC02816	ko00000,ko00001,ko00002,ko01000	-	-	-	AAA_26,DRTGG,PTA_PTB
lcl|NC_009525.1_cds_WP_003402100.1_429	419947.MRA_0416	0.0	1483.0	COG0515@1|root,COG0515@2|Bacteria,2GJ24@201174|Actinobacteria,232DK@1762|Mycobacteriaceae	201174|Actinobacteria	KLT	serine threonine protein kinase	pknG	GO:0001898,GO:0001899,GO:0002682,GO:0002684,GO:0003674,GO:0003824,GO:0004672,GO:0004674,GO:0005488,GO:0005515,GO:0005575,GO:0005622,GO:0005623,GO:0005737,GO:0005829,GO:0005886,GO:0006082,GO:0006464,GO:0006468,GO:0006520,GO:0006536,GO:0006538,GO:0006541,GO:0006543,GO:0006793,GO:0006796,GO:0006807,GO:0008150,GO:0008152,GO:0009056,GO:0009063,GO:0009064,GO:0009065,GO:0009405,GO:0009605,GO:0009607,GO:…	2.7.11.1	ko:K14949	ko05152,map05152	-	-	-	ko00000,ko00001,ko01000,ko01001	-	-	-	Pkinase,PknG_TPR,PknG_rubred
lcl|NC_009525.1_cds_WP_003900142.1_430	419947.MRA_0417	6.88e-231	636.0	COG0834@1|root,COG0834@2|Bacteria,2GJH8@201174|Actinobacteria,233SS@1762|Mycobacteriaceae	201174|Actinobacteria	ET	ABC transporter substrate-binding protein	glnH	-	-	ko:K02030	-	M00236	-	-	ko00000,ko00002,ko02000	3.A.1.3	-	-	SBP_bac_3
lcl|NC_009525.1_cds_WP_003911172.1_431	419947.MRA_0418	3.18e-299	818.0	COG5278@1|root,COG5278@2|Bacteria,2GJ1Q@201174|Actinobacteria,236RM@1762|Mycobacteriaceae	201174|Actinobacteria	T	phosphoserine phosphatase activity	-	-	-	-	-	-	-	-	-	-	-	-	-
lcl|NC_009525.1_cds_WP_003402118.1_434	419947.MRA_0421	6.28e-249	682.0	COG0665@1|root,COG0665@2|Bacteria,2GJVR@201174|Actinobacteria,232EH@1762|Mycobacteriaceae	201174|Actinobacteria	E	Glycine oxidase	thiO	-	1.4.3.19	ko:K03153	ko00730,ko01100,map00730,map01100	-	R07463	RC01788	ko00000,ko00001,ko01000	-	-	-	DAO
lcl|NC_009525.1_cds_WP_003402121.1_435	419947.MRA_0422	4e-40	132.0	COG2104@1|root,COG2104@2|Bacteria,2HSAA@201174|Actinobacteria,23B6S@1762|Mycobacteriaceae	201174|Actinobacteria	H	thiamine biosynthesis protein ThiS	thiS	-	-	ko:K03154	ko04122,map04122	-	-	-	ko00000,ko00001	-	-	-	ThiS
lcl|NC_009525.1_cds_WP_003916659.1_436	419947.MRA_0423	1.22e-170	477.0	COG2022@1|root,COG2022@2|Bacteria,2GM62@201174|Actinobacteria,233PI@1762|Mycobacteriaceae	201174|Actinobacteria	H	Catalyzes the rearrangement of 1-deoxy-D-xylulose 5- phosphate (DXP) to produce the thiazole phosphate moiety of thiamine. Sulfur is provided by the thiocarboxylate moiety of the carrier protein ThiS. In vitro, sulfur can be provided by H(2)S	thiG	GO:0008150,GO:0040007	2.8.1.10	ko:K03149	ko00730,ko01100,map00730,map01100	-	R10247	RC03096,RC03097,RC03461	ko00000,ko00001,ko01000	-	-	-	ThiG
lcl|NC_009525.1_cds_WP_003402133.1_438	419947.MRA_0424	0.0	980.0	COG2234@1|root,COG2234@2|Bacteria,2HEN8@201174|Actinobacteria,235II@1762|Mycobacteriaceae	201174|Actinobacteria	S	Peptidase, M28	lpqL	GO:0005575,GO:0005576,GO:0005623,GO:0005886,GO:0016020,GO:0044464,GO:0071944	-	-	-	-	-	-	-	-	-	-	PA,Peptidase_M28
lcl|NC_009525.1_cds_WP_003898442.1_439	419947.MRA_0425	0.0	992.0	COG2321@1|root,COG2321@2|Bacteria,2HBKZ@201174|Actinobacteria,232SM@1762|Mycobacteriaceae	201174|Actinobacteria	S	neutral zinc metallopeptidase	lpqM	-	-	ko:K07054	-	-	-	-	ko00000	-	-	-	Zn_peptidase
lcl|NC_009525.1_cds_WP_003402145.1_441	419947.MRA_0427	1.58e-147	415.0	COG3571@1|root,COG3571@2|Bacteria,2GKKE@201174|Actinobacteria,234V8@1762|Mycobacteriaceae	201174|Actinobacteria	S	hydrolase of the alpha beta-hydrolase fold	-	-	-	ko:K07020	-	-	-	-	ko00000	-	-	-	DLH
lcl|NC_009525.1_cds_WP_003900143.1_443	419947.MRA_0429	0.0	1104.0	COG0422@1|root,COG0422@2|Bacteria,2GJ3Y@201174|Actinobacteria,234MB@1762|Mycobacteriaceae	201174|Actinobacteria	H	Catalyzes the synthesis of the hydroxymethylpyrimidine phosphate (HMP-P) moiety of thiamine from aminoimidazole ribotide (AIR) in a radical S-adenosyl-L-methionine (SAM)-dependent reaction	thiC	GO:0005575,GO:0005622,GO:0005623,GO:0005737,GO:0005829,GO:0005886,GO:0006725,GO:0006766,GO:0006767,GO:0006772,GO:0006790,GO:0006807,GO:0008150,GO:0008152,GO:0009058,GO:0009110,GO:0009228,GO:0009987,GO:0016020,GO:0017144,GO:0018130,GO:0019438,GO:0034641,GO:0040007,GO:0042364,GO:0042723,GO:0042724,GO:0044237,GO:0044249,GO:0044271,GO:0044272,GO:0044281,GO:0044283,GO:0044424,GO:0044444,GO:0044464,GO:…	4.1.99.17	ko:K03147	ko00730,ko01100,map00730,map01100	M00127	R03472	RC03251,RC03252	ko00000,ko00001,ko00002,ko01000	-	-	-	ThiC-associated,ThiC_Rad_SAM
lcl|NC_009525.1_cds_MRA_RS23025_446	419947.MRA_0430	0.0	1326.0	COG0474@1|root,COG0474@2|Bacteria,2GJJC@201174|Actinobacteria,232MQ@1762|Mycobacteriaceae	201174|Actinobacteria	P	ATPase, P-type (transporting), HAD superfamily, subfamily IC	ctpH	-	-	ko:K12955	-	-	-	-	ko00000,ko01000	3.A.3.24	-	-	Cation_ATPase_C,E1-E2_ATPase,Hydrolase
lcl|NC_009525.1_cds_WP_003900144.1_449	419947.MRA_0433	1.17e-218	603.0	COG0454@1|root,COG0456@2|Bacteria,2H5WU@201174|Actinobacteria,235BK@1762|Mycobacteriaceae	201174|Actinobacteria	K	acetyltransferase	-	-	2.3.1.1	ko:K22476	ko00220,ko01210,ko01230,map00220,map01210,map01230	-	R00259	RC00004,RC00064	ko00000,ko00001,ko01000	-	-	-	Acetyltransf_1,FR47
lcl|NC_009525.1_cds_WP_009938812.1_452	419947.MRA_0436	1.82e-95	280.0	2DP6P@1|root,330SA@2|Bacteria,2IIM6@201174|Actinobacteria,2397D@1762|Mycobacteriaceae	201174|Actinobacteria	S	LytR cell envelope-related transcriptional attenuator	-	-	-	-	-	-	-	-	-	-	-	-	LytR_C
lcl|NC_009525.1_cds_WP_003900146.1_455	419947.MRA_0439	5.93e-156	437.0	COG2802@1|root,COG2802@2|Bacteria,2GNWA@201174|Actinobacteria,2361E@1762|Mycobacteriaceae	201174|Actinobacteria	S	ATP-dependent protease	-	-	3.4.21.53	ko:K01338,ko:K07157	ko04112,map04112	-	-	-	ko00000,ko00001,ko01000,ko01002	-	-	-	LON_substr_bdg
lcl|NC_009525.1_cds_WP_003402206.1_456	419947.MRA_0440	0.0	1355.0	COG0464@1|root,COG1222@1|root,COG0464@2|Bacteria,COG1222@2|Bacteria,2GJNW@201174|Actinobacteria,233JY@1762|Mycobacteriaceae	201174|Actinobacteria	O	Belongs to the AAA ATPase family	-	-	-	ko:K13525	ko04141,ko05134,map04141,map05134	M00400,M00403	-	-	ko00000,ko00001,ko00002,ko03019,ko04131,ko04147	3.A.16.1	-	-	AAA,CDC48_N
lcl|NC_009525.1_cds_WP_003906370.1_457	419947.MRA_0441	2.23e-199	553.0	COG1183@1|root,COG1183@2|Bacteria,2I3MV@201174|Actinobacteria,2340T@1762|Mycobacteriaceae	201174|Actinobacteria	I	Belongs to the CDP-alcohol phosphatidyltransferase class-I family	pssA	GO:0003674,GO:0003824,GO:0003882,GO:0005575,GO:0005576,GO:0005622,GO:0005623,GO:0005737,GO:0005886,GO:0006629,GO:0006644,GO:0006650,GO:0006793,GO:0006796,GO:0008150,GO:0008152,GO:0008610,GO:0008654,GO:0009058,GO:0009987,GO:0016020,GO:0016740,GO:0016772,GO:0016780,GO:0017169,GO:0019637,GO:0044237,GO:0044238,GO:0044249,GO:0044255,GO:0044424,GO:0044464,GO:0045017,GO:0046474,GO:0046486,GO:0071704,GO:…	2.7.8.8	ko:K17103	ko00260,ko00564,ko01100,ko01110,map00260,map00564,map01100,map01110	M00093	R01800	RC00002,RC00017,RC02795	ko00000,ko00001,ko00002,ko01000	-	-	-	CDP-OH_P_tran_2,CDP-OH_P_transf
lcl|NC_009525.1_cds_WP_003402216.1_458	419947.MRA_0442	9.75e-162	453.0	COG0688@1|root,COG0688@2|Bacteria,2GMMF@201174|Actinobacteria,232X2@1762|Mycobacteriaceae	201174|Actinobacteria	I	Catalyzes the formation of phosphatidylethanolamine (PtdEtn) from phosphatidylserine (PtdSer)	psd	GO:0005575,GO:0005623,GO:0005886,GO:0016020,GO:0044464,GO:0071944	4.1.1.65	ko:K01613	ko00564,ko01100,ko01110,map00564,map01100,map01110	M00093	R02055	RC00299	ko00000,ko00001,ko00002,ko01000	-	-	-	PS_Dcarbxylase
lcl|NC_009525.1_cds_WP_003898451.1_459	419947.MRA_0443	2.25e-284	778.0	COG0303@1|root,COG0303@2|Bacteria,2GJC3@201174|Actinobacteria,232SK@1762|Mycobacteriaceae	201174|Actinobacteria	H	Molybdopterin	moeA	GO:0003674,GO:0003824,GO:0005575,GO:0005622,GO:0005623,GO:0005737,GO:0006139,GO:0006163,GO:0006464,GO:0006725,GO:0006732,GO:0006753,GO:0006777,GO:0006793,GO:0006796,GO:0006807,GO:0008150,GO:0008152,GO:0009058,GO:0009108,GO:0009116,GO:0009117,GO:0009119,GO:0009141,GO:0009144,GO:0009150,GO:0009199,GO:0009205,GO:0009259,GO:0009987,GO:0016740,GO:0016772,GO:0016779,GO:0018130,GO:0018315,GO:0019538,GO:…	2.10.1.1	ko:K03750	ko00790,ko01100,map00790,map01100	-	R09735	RC03462	ko00000,ko00001,ko01000	-	-	-	MoCF_biosynth,MoeA_C,MoeA_N
lcl|NC_009525.1_cds_WP_003402240.1_464	419947.MRA_0448	6.21e-124	352.0	COG2318@1|root,COG2318@2|Bacteria,2II1I@201174|Actinobacteria,237UY@1762|Mycobacteriaceae	201174|Actinobacteria	S	Protein of unknown function (DUF664)	-	-	-	-	-	-	-	-	-	-	-	-	DUF664,DinB_2
lcl|NC_009525.1_cds_WP_003898455.1_465	419947.MRA_0449	6.28e-154	433.0	COG5343@1|root,COG5343@2|Bacteria,2I8NI@201174|Actinobacteria,235HJ@1762|Mycobacteriaceae	201174|Actinobacteria	S	An anti-sigma factor for extracytoplasmic function (ECF) sigma factor SigK. ECF sigma factors are held in an inactive form by an anti-sigma factor until released by regulated intramembrane proteolysis (RIP). RIP occurs when an extracytoplasmic signal triggers a concerted proteolytic cascade to transmit information and elicit cellular responses. The membrane-spanning regulatory substrate protein i…	rskA	GO:0000988,GO:0000989,GO:0003674,GO:0005575,GO:0005618,GO:0005623,GO:0005886,GO:0006417,GO:0008150,GO:0009889,GO:0010468,GO:0010556,GO:0010608,GO:0016020,GO:0016989,GO:0019219,GO:0019222,GO:0030312,GO:0031323,GO:0031326,GO:0032268,GO:0034248,GO:0044464,GO:0050789,GO:0050794,GO:0051171,GO:0051246,GO:0051252,GO:0060255,GO:0065007,GO:0071944,GO:0080090,GO:0140110,GO:1903506,GO:2000112,GO:2001141	-	-	-	-	-	-	-	-	-	-	RskA
lcl|NC_009525.1_cds_WP_003402268.1_470	419947.MRA_0454	0.0	879.0	COG2907@1|root,COG2907@2|Bacteria,2GJMW@201174|Actinobacteria,235UD@1762|Mycobacteriaceae	201174|Actinobacteria	S	Flavin containing amine oxidoreductase	-	-	-	ko:K06954	-	-	-	-	ko00000	-	-	-	Amino_oxidase,DUF1365
lcl|NC_009525.1_cds_WP_003898458.1_471	419947.MRA_0455	0.0	1804.0	COG1033@1|root,COG2409@1|root,COG1033@2|Bacteria,COG2409@2|Bacteria,2GKX6@201174|Actinobacteria,232PC@1762|Mycobacteriaceae	201174|Actinobacteria	S	transport protein	mmpL4	GO:0005575,GO:0005576,GO:0005618,GO:0005623,GO:0005886,GO:0008150,GO:0016020,GO:0030312,GO:0040007,GO:0044110,GO:0044116,GO:0044117,GO:0044119,GO:0044403,GO:0044419,GO:0044464,GO:0051704,GO:0071944	-	ko:K06994	-	-	-	-	ko00000	-	-	-	MMPL
lcl|NC_009525.1_cds_WP_003402284.1_474	83332.Rv0453	0.0	931.0	COG5651@1|root,COG5651@2|Bacteria,2GN0X@201174|Actinobacteria,235QZ@1762|Mycobacteriaceae	201174|Actinobacteria	N	PPE family	-	GO:0005575,GO:0005576,GO:0005622,GO:0005623,GO:0005737,GO:0005829,GO:0044424,GO:0044444,GO:0044464	-	-	-	-	-	-	-	-	-	-	PPE
lcl|NC_009525.1_cds_WP_003402286.1_476	419947.MRA_0460	8.87e-106	305.0	2ARRN@1|root,31H2R@2|Bacteria,2IG68@201174|Actinobacteria,238UK@1762|Mycobacteriaceae	201174|Actinobacteria	S	Domain of unknown function (DUF5078)	-	-	-	-	-	-	-	-	-	-	-	-	DUF5078
lcl|NC_009525.1_cds_WP_003898463.1_477	419947.MRA_0461	1.49e-222	613.0	COG1024@1|root,COG1024@2|Bacteria,2HDTB@201174|Actinobacteria,2334H@1762|Mycobacteriaceae	201174|Actinobacteria	I	Belongs to the enoyl-CoA hydratase isomerase family	echA2	-	4.2.1.17	ko:K01692	ko00071,ko00280,ko00281,ko00310,ko00360,ko00362,ko00380,ko00410,ko00627,ko00640,ko00650,ko00903,ko00930,ko01100,ko01110,ko01120,ko01130,ko01212,map00071,map00280,map00281,map00310,map00360,map00362,map00380,map00410,map00627,map00640,map00650,map00903,map00930,map01100,map01110,map01120,map01130,map01212	M00032,M00087	R03026,R03045,R04137,R04170,R04204,R04224,R04738,R04740,R04744,R04746,R04749,R05595,R06411,R06412,R06942,R08093	RC00831,RC00834,RC01086,RC01095,RC01098,RC01103,RC01217,RC02115	ko00000,ko00001,ko00002,ko01000	-	-	-	ECH_1
lcl|NC_009525.1_cds_WP_003402292.1_480	419947.MRA_0463	0.0	1389.0	COG1505@1|root,COG1505@2|Bacteria,2IRXB@201174|Actinobacteria,232NX@1762|Mycobacteriaceae	201174|Actinobacteria	E	Prolyl oligopeptidase	-	-	3.4.21.26	ko:K01322	ko04614,map04614	-	-	-	ko00000,ko00001,ko01000,ko01002	-	-	-	Peptidase_S9,Peptidase_S9_N
lcl|NC_009525.1_cds_WP_003402294.1_481	419947.MRA_0464	0.0	1017.0	COG1012@1|root,COG1012@2|Bacteria,2GIWZ@201174|Actinobacteria,234Y9@1762|Mycobacteriaceae	201174|Actinobacteria	C	Belongs to the aldehyde dehydrogenase family	aldA	GO:0005575,GO:0005623,GO:0005886,GO:0008150,GO:0009605,GO:0009607,GO:0016020,GO:0035821,GO:0043207,GO:0044003,GO:0044403,GO:0044419,GO:0044464,GO:0050896,GO:0051701,GO:0051704,GO:0051707,GO:0051817,GO:0052031,GO:0052173,GO:0052200,GO:0052255,GO:0052552,GO:0052553,GO:0052561,GO:0052562,GO:0052564,GO:0052572,GO:0071944,GO:0075136	-	ko:K00138,ko:K18370	ko00010,ko00620,ko00640,ko01100,ko01110,ko01120,map00010,map00620,map00640,map01100,map01110,map01120	-	R00711,R10703	RC00047,RC00545	ko00000,ko00001,ko01000	-	-	-	Aldedh
lcl|NC_009525.1_cds_WP_003898464.1_482	419947.MRA_0465	5.18e-119	339.0	COG3564@1|root,COG3564@2|Bacteria,2IKTA@201174|Actinobacteria,238S6@1762|Mycobacteriaceae	201174|Actinobacteria	S	Protein of unknown function (DUF779)	-	-	-	ko:K09959	-	-	-	-	ko00000	-	-	-	DUF779
lcl|NC_009525.1_cds_WP_003898466.1_484	419947.MRA_0467	1.38e-121	347.0	2ATNP@1|root,31J77@2|Bacteria,2IIZZ@201174|Actinobacteria,239HI@1762|Mycobacteriaceae	201174|Actinobacteria	-	-	-	-	-	-	-	-	-	-	-	-	-	-	-
lcl|NC_009525.1_cds_WP_003898467.1_488	419947.MRA_0471	0.0	944.0	COG1396@1|root,COG3800@1|root,COG1396@2|Bacteria,COG3800@2|Bacteria,2GMWU@201174|Actinobacteria,233A3@1762|Mycobacteriaceae	201174|Actinobacteria	K	transcriptional	ramB	GO:0001666,GO:0003674,GO:0003676,GO:0003677,GO:0005488,GO:0005575,GO:0005623,GO:0005886,GO:0006355,GO:0006950,GO:0008150,GO:0009628,GO:0009889,GO:0010468,GO:0010556,GO:0016020,GO:0019219,GO:0019222,GO:0031323,GO:0031326,GO:0036293,GO:0044464,GO:0050789,GO:0050794,GO:0050896,GO:0051171,GO:0051252,GO:0060255,GO:0065007,GO:0070482,GO:0071944,GO:0080090,GO:0097159,GO:1901363,GO:1903506,GO:2000112,GO:…	-	ko:K07110	-	-	-	-	ko00000,ko03000	-	-	-	DUF2083,HTH_19,HTH_3,HTH_31,Peptidase_M78
lcl|NC_009525.1_cds_WP_003900153.1_492	419947.MRA_0475	2.75e-209	578.0	COG2230@1|root,COG2230@2|Bacteria,2GKIA@201174|Actinobacteria,232Q2@1762|Mycobacteriaceae	201174|Actinobacteria	M	synthase	umaA	GO:0003674,GO:0003824,GO:0005575,GO:0005623,GO:0005886,GO:0006629,GO:0008150,GO:0008152,GO:0008168,GO:0008610,GO:0008757,GO:0008825,GO:0009058,GO:0016020,GO:0016740,GO:0016741,GO:0032259,GO:0044238,GO:0044464,GO:0071704,GO:0071944,GO:1901576	2.1.1.79	ko:K00574	-	-	-	-	ko00000,ko01000	-	-	-	CMAS
lcl|NC_009525.1_cds_WP_003898470.1_494	419947.MRA_0477	1.54e-114	327.0	COG1575@1|root,COG1575@2|Bacteria,2IPQ8@201174|Actinobacteria	201174|Actinobacteria	H	Belongs to the MenA family. Type 1 subfamily	-	-	-	-	-	-	-	-	-	-	-	-	UbiA
lcl|NC_009525.1_cds_WP_003402332.1_497	419947.MRA_0480	0.0	877.0	COG2733@1|root,COG2733@2|Bacteria,2GKGM@201174|Actinobacteria,2335E@1762|Mycobacteriaceae	201174|Actinobacteria	S	membrane	-	-	-	-	-	-	-	-	-	-	-	-	DUF445
lcl|NC_009525.1_cds_WP_003402339.1_499	419947.MRA_0482	3.49e-42	147.0	2EBKM@1|root,335M1@2|Bacteria,2I5HJ@201174|Actinobacteria,232MM@1762|Mycobacteriaceae	201174|Actinobacteria	S	Required for extrapulmonary dissemination. mediates adherence to epithelial cells by binding to sulfated glycoconjugates present at the surface of these cells	hbhA	GO:0003674,GO:0005488,GO:0005515,GO:0005539,GO:0005575,GO:0005618,GO:0005622,GO:0005623,GO:0005737,GO:0005829,GO:0005886,GO:0007155,GO:0007157,GO:0008150,GO:0008201,GO:0009986,GO:0016020,GO:0022610,GO:0030100,GO:0030312,GO:0032879,GO:0035821,GO:0042802,GO:0043167,GO:0043168,GO:0044003,GO:0044068,GO:0044077,GO:0044078,GO:0044403,GO:0044419,GO:0044424,GO:0044444,GO:0044464,GO:0045807,GO:0048259,GO:…	-	ko:K16645	-	-	-	-	ko00000,ko00536	-	-	-	-
lcl|NC_009525.1_cds_WP_003898475.1_503	419947.MRA_0486	2.54e-243	669.0	2E4QP@1|root,32ZJ9@2|Bacteria,2H34Q@201174|Actinobacteria,2334X@1762|Mycobacteriaceae	201174|Actinobacteria	S	Protein of unknown function (DUF2993)	-	GO:0005575,GO:0005623,GO:0005886,GO:0005887,GO:0008150,GO:0016020,GO:0016021,GO:0031224,GO:0031226,GO:0040007,GO:0044425,GO:0044459,GO:0044464,GO:0071944	-	-	-	-	-	-	-	-	-	-	DUF2993
lcl|NC_009525.1_cds_WP_003402354.1_506	419947.MRA_0489	9.88e-263	720.0	COG0812@1|root,COG0812@2|Bacteria,2GIV2@201174|Actinobacteria,232J7@1762|Mycobacteriaceae	201174|Actinobacteria	M	Cell wall formation	murB	-	1.3.1.98	ko:K00075	ko00520,ko00550,ko01100,map00520,map00550,map01100	-	R03191,R03192	RC02639	ko00000,ko00001,ko01000,ko01011	-	-	-	FAD_binding_4,MurB_C
lcl|NC_009525.1_cds_WP_003900154.1_508	419947.MRA_0491	1.88e-153	434.0	COG4221@1|root,COG4221@2|Bacteria,2GMGQ@201174|Actinobacteria,234IZ@1762|Mycobacteriaceae	201174|Actinobacteria	S	Belongs to the short-chain dehydrogenases reductases (SDR) family	sdh	GO:0005575,GO:0005623,GO:0005886,GO:0016020,GO:0044464,GO:0071944	-	-	-	-	-	-	-	-	-	-	adh_short
lcl|NC_009525.1_cds_WP_003402379.1_513	419947.MRA_0496	8.05e-179	498.0	COG0588@1|root,COG0588@2|Bacteria,2GK8F@201174|Actinobacteria,2337Z@1762|Mycobacteriaceae	201174|Actinobacteria	G	Catalyzes the interconversion of 2-phosphoglycerate and 3-phosphoglycerate	gpmA	GO:0003674,GO:0003824,GO:0004619,GO:0005488,GO:0005515,GO:0005575,GO:0005622,GO:0005623,GO:0005737,GO:0005829,GO:0005886,GO:0005975,GO:0005996,GO:0006006,GO:0006082,GO:0006090,GO:0006091,GO:0006094,GO:0006096,GO:0006109,GO:0006139,GO:0006140,GO:0006163,GO:0006164,GO:0006165,GO:0006725,GO:0006732,GO:0006733,GO:0006753,GO:0006754,GO:0006757,GO:0006793,GO:0006796,GO:0006807,GO:0008150,GO:0008152,GO:…	5.4.2.11	ko:K01834	ko00010,ko00260,ko00680,ko01100,ko01110,ko01120,ko01130,ko01200,ko01230,ko04922,ko05230,map00010,map00260,map00680,map01100,map01110,map01120,map01130,map01200,map01230,map04922,map05230	M00001,M00002,M00003	R01518	RC00536	ko00000,ko00001,ko00002,ko01000,ko04131,ko04147	-	-	-	His_Phos_1
lcl|NC_009525.1_cds_WP_003908534.1_516	419947.MRA_0499	0.0	1223.0	COG2303@1|root,COG2303@2|Bacteria,2GJKS@201174|Actinobacteria,23F02@1762|Mycobacteriaceae	201174|Actinobacteria	E	oxidoreductase	-	GO:0005575,GO:0005622,GO:0005623,GO:0005737,GO:0005829,GO:0044424,GO:0044444,GO:0044464	-	-	-	-	-	-	-	-	-	-	GMC_oxred_C,GMC_oxred_N,Gluconate_2-dh3
lcl|NC_009525.1_cds_WP_003911182.1_518	419947.MRA_0500	2.39e-244	669.0	2CDI5@1|root,2Z7ZQ@2|Bacteria,2I8FG@201174|Actinobacteria,235TE@1762|Mycobacteriaceae	201174|Actinobacteria	-	-	-	-	-	-	-	-	-	-	-	-	-	-	-
lcl|NC_009525.1_cds_WP_003898483.1_519	419947.MRA_0501	1.93e-161	453.0	COG2186@1|root,COG2186@2|Bacteria,2I90D@201174|Actinobacteria,236Z8@1762|Mycobacteriaceae	201174|Actinobacteria	K	GntR family	-	-	-	-	-	-	-	-	-	-	-	-	FCD,GntR
lcl|NC_009525.1_cds_WP_023637344.1_520	419947.MRA_0502	3.52e-204	564.0	28IRH@1|root,2Z8QX@2|Bacteria,2GJW6@201174|Actinobacteria,2345K@1762|Mycobacteriaceae	201174|Actinobacteria	-	-	-	-	-	-	-	-	-	-	-	-	-	-	-
lcl|NC_009525.1_cds_WP_003914605.1_525	419947.MRA_0507	1.7e-186	521.0	COG0345@1|root,COG0345@2|Bacteria,2GJ7D@201174|Actinobacteria,234Y2@1762|Mycobacteriaceae	201174|Actinobacteria	E	Catalyzes the reduction of 1-pyrroline-5-carboxylate (PCA) to L-proline	proC	GO:0000287,GO:0003674,GO:0003824,GO:0004735,GO:0005488,GO:0005575,GO:0005623,GO:0005886,GO:0006082,GO:0006520,GO:0006560,GO:0006561,GO:0006807,GO:0008150,GO:0008152,GO:0008652,GO:0009058,GO:0009064,GO:0009084,GO:0009987,GO:0016020,GO:0016053,GO:0016491,GO:0016645,GO:0016646,GO:0018130,GO:0019752,GO:0030145,GO:0040007,GO:0043167,GO:0043169,GO:0043436,GO:0044237,GO:0044238,GO:0044249,GO:0044281,GO:…	1.5.1.2	ko:K00286	ko00330,ko01100,ko01110,ko01130,ko01230,map00330,map01100,map01110,map01130,map01230	M00015	R01248,R01251,R03291,R03293	RC00054,RC00083	ko00000,ko00001,ko00002,ko01000	-	-	-	F420_oxidored,P5CR_dimer
lcl|NC_009525.1_cds_WP_003898486.1_529	419947.MRA_0510	2.71e-259	710.0	COG0204@1|root,COG0204@2|Bacteria,2GJKH@201174|Actinobacteria,2328Z@1762|Mycobacteriaceae	201174|Actinobacteria	I	Acyltransferase	-	GO:0005575,GO:0005623,GO:0005886,GO:0016020,GO:0044464,GO:0071944	-	-	-	-	-	-	-	-	-	-	Acyltransferase
lcl|NC_009525.1_cds_WP_003402621.1_530	419947.MRA_0511	1.18e-227	625.0	COG2230@1|root,COG2230@2|Bacteria,2I6VZ@201174|Actinobacteria,233SI@1762|Mycobacteriaceae	201174|Actinobacteria	M	synthase	cmaA2	GO:0001666,GO:0003674,GO:0003824,GO:0005575,GO:0005622,GO:0005623,GO:0005737,GO:0005829,GO:0005886,GO:0006082,GO:0006629,GO:0006631,GO:0006633,GO:0006732,GO:0006790,GO:0006950,GO:0008150,GO:0008152,GO:0008168,GO:0008610,GO:0008757,GO:0008825,GO:0009058,GO:0009059,GO:0009273,GO:0009605,GO:0009607,GO:0009628,GO:0009987,GO:0016020,GO:0016043,GO:0016053,GO:0016740,GO:0016741,GO:0017144,GO:0019752,GO:…	2.1.1.79	ko:K00574	-	-	-	-	ko00000,ko01000	-	-	iNJ661.Rv0503c	CMAS
lcl|NC_009525.1_cds_WP_003402626.1_531	419947.MRA_0512	5.77e-113	324.0	COG2030@1|root,COG2030@2|Bacteria,2GMVC@201174|Actinobacteria,236YK@1762|Mycobacteriaceae	201174|Actinobacteria	I	Belongs to the UPF0336 family	-	GO:0005575,GO:0005618,GO:0005623,GO:0005886,GO:0016020,GO:0030312,GO:0044464,GO:0071944	-	-	-	-	-	-	-	-	-	-	MaoC_dehydrat_N,MaoC_dehydratas
lcl|NC_009525.1_cds_WP_003911183.1_534	419947.MRA_0515	0.0	1820.0	COG1033@1|root,COG2409@1|root,COG1033@2|Bacteria,COG2409@2|Bacteria,2GKX6@201174|Actinobacteria,232PC@1762|Mycobacteriaceae	201174|Actinobacteria	S	transport protein	mmpL2	GO:0005575,GO:0005618,GO:0005623,GO:0005886,GO:0008150,GO:0016020,GO:0030312,GO:0040007,GO:0044110,GO:0044116,GO:0044117,GO:0044119,GO:0044403,GO:0044419,GO:0044464,GO:0051704,GO:0071944	-	ko:K06994	-	-	-	-	ko00000	-	-	-	MMPL
lcl|NC_009525.1_cds_WP_003900163.1_538	419947.MRA_0518	0.0	1088.0	COG0007@1|root,COG1587@1|root,COG0007@2|Bacteria,COG1587@2|Bacteria,2GMJZ@201174|Actinobacteria,2342U@1762|Mycobacteriaceae	201174|Actinobacteria	H	Uroporphyrinogen-III synthase	hemD	-	2.1.1.107,4.2.1.75	ko:K01719,ko:K13542	ko00860,ko01100,ko01110,ko01120,map00860,map01100,map01110,map01120	M00121	R03165,R03194	RC00003,RC00871,RC01861	ko00000,ko00001,ko00002,ko01000	-	-	-	HEM4,TP_methylase
lcl|NC_009525.1_cds_WP_003898491.1_539	419947.MRA_0519	2.04e-228	630.0	COG0113@1|root,COG0113@2|Bacteria,2GJJ0@201174|Actinobacteria,234Q5@1762|Mycobacteriaceae	201174|Actinobacteria	H	Belongs to the ALAD family	hemB	GO:0003674,GO:0003824,GO:0004655,GO:0005488,GO:0005575,GO:0005618,GO:0005622,GO:0005623,GO:0005737,GO:0005829,GO:0006725,GO:0006778,GO:0006779,GO:0006783,GO:0006807,GO:0008150,GO:0008152,GO:0008270,GO:0009058,GO:0009987,GO:0016829,GO:0016835,GO:0016836,GO:0018130,GO:0019438,GO:0030312,GO:0033013,GO:0033014,GO:0034641,GO:0042168,GO:0042440,GO:0043167,GO:0043169,GO:0044237,GO:0044249,GO:0044271,GO:…	4.2.1.24	ko:K01698	ko00860,ko01100,ko01110,ko01120,map00860,map01100,map01110,map01120	M00121	R00036	RC00918,RC01781	ko00000,ko00001,ko00002,ko01000,ko04147	-	-	-	ALAD
lcl|NC_009525.1_cds_WP_003911231.1_549	419947.MRA_0529	1.49e-297	815.0	COG1113@1|root,COG1113@2|Bacteria,2GJ0X@201174|Actinobacteria,234JB@1762|Mycobacteriaceae	201174|Actinobacteria	E	permease	gabP	-	-	ko:K03293,ko:K11735,ko:K16237	-	-	-	-	ko00000,ko02000	2.A.3.1,2.A.3.1.12,2.A.3.1.4,2.A.3.1.5	-	iNJ661.Rv0522	AA_permease
lcl|NC_009525.1_cds_WP_003402848.1_555	419947.MRA_0535	0.0	1044.0	COG1333@1|root,COG1333@2|Bacteria,2GMGH@201174|Actinobacteria,232SF@1762|Mycobacteriaceae	201174|Actinobacteria	O	ResB protein required for cytochrome c biosynthesis	resB	-	-	ko:K07399	-	-	-	-	ko00000	-	-	-	ResB
lcl|NC_009525.1_cds_WP_003898495.1_557	419947.MRA_0537	5.62e-294	802.0	COG0455@1|root,COG0455@2|Bacteria,2GMK0@201174|Actinobacteria,232JT@1762|Mycobacteriaceae	201174|Actinobacteria	D	Cellulose biosynthesis protein BcsQ	-	-	-	-	-	-	-	-	-	-	-	-	AAA_31,CbiA
lcl|NC_009525.1_cds_WP_003402861.1_561	419947.MRA_0540	2.83e-238	655.0	COG0332@1|root,COG0332@2|Bacteria,2GJP8@201174|Actinobacteria,233MH@1762|Mycobacteriaceae	201174|Actinobacteria	I	Catalyzes the condensation reaction of fatty acid synthesis by the addition to an acyl acceptor of two carbons from malonyl-ACP. Catalyzes the first condensation reaction which initiates fatty acid synthesis and may therefore play a role in governing the total rate of fatty acid production. Possesses both acetoacetyl-ACP synthase and acetyl transacylase activities. Its substrate specificity deter…	fabH	GO:0000062,GO:0000166,GO:0003674,GO:0003824,GO:0004312,GO:0004315,GO:0005488,GO:0006082,GO:0006139,GO:0006163,GO:0006629,GO:0006631,GO:0006633,GO:0006637,GO:0006725,GO:0006732,GO:0006753,GO:0006790,GO:0006793,GO:0006796,GO:0006807,GO:0008150,GO:0008152,GO:0008610,GO:0009058,GO:0009117,GO:0009150,GO:0009259,GO:0009987,GO:0016053,GO:0016740,GO:0016746,GO:0016747,GO:0017076,GO:0019637,GO:0019693,GO:…	2.3.1.180	ko:K00648,ko:K11608	ko00061,ko01100,ko01212,map00061,map01100,map01212	M00082,M00083	R10707	RC00004,RC02729,RC02888	ko00000,ko00001,ko00002,ko01000,ko01004	-	-	iNJ661.Rv0533c	ACP_syn_III,ACP_syn_III_C
lcl|NC_009525.1_cds_WP_003402865.1_562	419947.MRA_0541	3.4e-197	548.0	COG1575@1|root,COG1575@2|Bacteria,2GJBS@201174|Actinobacteria,232II@1762|Mycobacteriaceae	201174|Actinobacteria	H	Belongs to the MenA family. Type 1 subfamily	menA	GO:0003674,GO:0003824,GO:0004659,GO:0006732,GO:0006733,GO:0006743,GO:0006744,GO:0006766,GO:0006775,GO:0008150,GO:0008152,GO:0009058,GO:0009108,GO:0009110,GO:0009233,GO:0009234,GO:0009987,GO:0016740,GO:0016765,GO:0032194,GO:0042180,GO:0042181,GO:0042362,GO:0042371,GO:0042373,GO:0044237,GO:0044249,GO:0044281,GO:0044283,GO:0051186,GO:0051188,GO:0071704,GO:1901576,GO:1901661,GO:1901663	2.5.1.74	ko:K02548	ko00130,ko01100,ko01110,map00130,map01100,map01110	M00116	R05617,R06858,R10757	RC02935,RC02936,RC03264	ko00000,ko00001,ko00002,ko01000,ko01006	-	-	-	UbiA
lcl|NC_009525.1_cds_WP_003402868.1_564	419947.MRA_0543	3.26e-254	696.0	COG0451@1|root,COG0451@2|Bacteria,2GK8K@201174|Actinobacteria,234JM@1762|Mycobacteriaceae	201174|Actinobacteria	GM	dehydratase	galE3	-	5.1.3.25	ko:K17947	ko00523,ko01130,map00523,map01130	-	R10279	RC00289	ko00000,ko00001,ko01000	-	-	-	Epimerase
lcl|NC_009525.1_cds_WP_003911223.1_566	419947.MRA_0545	6.12e-271	756.0	2DJHP@1|root,30663@2|Bacteria,2I5KN@201174|Actinobacteria,237PD@1762|Mycobacteriaceae	201174|Actinobacteria	-	-	-	-	-	-	-	-	-	-	-	-	-	-	-
lcl|NC_009525.1_cds_WP_003898499.1_567	419947.MRA_0546	2.92e-152	428.0	COG1215@1|root,COG1215@2|Bacteria,2GMMV@201174|Actinobacteria,2353E@1762|Mycobacteriaceae	201174|Actinobacteria	M	PFAM Glycosyl transferase family 2	-	-	-	-	-	-	-	-	-	-	-	-	Glycos_transf_2
lcl|NC_009525.1_cds_WP_003911224.1_573	419947.MRA_0552	2.61e-280	768.0	COG0306@1|root,COG0306@2|Bacteria,2GJHK@201174|Actinobacteria,234S8@1762|Mycobacteriaceae	201174|Actinobacteria	P	phosphate transporter	pitA	GO:0003674,GO:0005215,GO:0005315,GO:0005575,GO:0005623,GO:0005886,GO:0005887,GO:0006810,GO:0006811,GO:0006817,GO:0006820,GO:0008150,GO:0015291,GO:0015318,GO:0015698,GO:0016020,GO:0016021,GO:0022804,GO:0022857,GO:0031224,GO:0031226,GO:0034220,GO:0035435,GO:0044425,GO:0044459,GO:0044464,GO:0051179,GO:0051234,GO:0055085,GO:0071944,GO:0098656,GO:0098660,GO:0098661	-	ko:K03306	-	-	-	-	ko00000	2.A.20	-	iNJ661.Rv0545c,iNJ661.Rv2281	PHO4
lcl|NC_009525.1_cds_WP_003911225.1_584	419947.MRA_0563	5.69e-111	320.0	2EDS1@1|root,337MI@2|Bacteria,2IQ90@201174|Actinobacteria,238RG@1762|Mycobacteriaceae	201174|Actinobacteria	-	-	-	-	-	-	-	-	-	-	-	-	-	-	DUF3592
lcl|NC_009525.1_cds_WP_003898502.1_585	419947.MRA_0564	4.8e-276	754.0	COG0438@1|root,COG0438@2|Bacteria,2GIZG@201174|Actinobacteria,234PF@1762|Mycobacteriaceae	201174|Actinobacteria	M	PFAM Glycosyl transferase, group 1	mgtA	GO:0000030,GO:0003674,GO:0003824,GO:0006629,GO:0006643,GO:0006664,GO:0008150,GO:0008152,GO:0008610,GO:0009058,GO:0009247,GO:0009987,GO:0016740,GO:0016757,GO:0016758,GO:0040007,GO:0044237,GO:0044238,GO:0044249,GO:0044255,GO:0046467,GO:0070085,GO:0071704,GO:0097502,GO:1901135,GO:1901137,GO:1901576,GO:1903509	-	ko:K12583	-	-	-	-	ko00000,ko01000,ko01003	-	GT4	-	Glyco_transf_4,Glycos_transf_1
lcl|NC_009525.1_cds_WP_003911240.1_588	419947.MRA_0567	1.23e-158	445.0	COG0500@1|root,COG2226@2|Bacteria,2I0G7@201174|Actinobacteria,23ET9@1762|Mycobacteriaceae	201174|Actinobacteria	Q	Thiopurine S-methyltransferase (TPMT)	-	GO:0001101,GO:0001666,GO:0003674,GO:0003824,GO:0005575,GO:0005622,GO:0005623,GO:0005737,GO:0005829,GO:0006873,GO:0006875,GO:0006879,GO:0006950,GO:0007154,GO:0008150,GO:0008152,GO:0008168,GO:0008757,GO:0009267,GO:0009605,GO:0009628,GO:0009719,GO:0009725,GO:0009751,GO:0009987,GO:0009991,GO:0010033,GO:0010106,GO:0014070,GO:0016740,GO:0016741,GO:0019725,GO:0030003,GO:0031667,GO:0031668,GO:0031669,GO:…	-	-	-	-	-	-	-	-	-	-	Methyltransf_25,Methyltransf_31,TPMT
lcl|NC_009525.1_cds_WP_003402981.1_593	419947.MRA_0572	0.0	1001.0	COG2072@1|root,COG2072@2|Bacteria,2GJEA@201174|Actinobacteria,232R1@1762|Mycobacteriaceae	201174|Actinobacteria	P	Flavoprotein involved in K transport	ethA	-	-	ko:K10215	ko00627,ko01120,map00627,map01120	-	R07836,R07837	RC02100,RC03121	ko00000,ko00001,ko01000	-	-	-	FMO-like,NAD_binding_8,Pyr_redox_2,Pyr_redox_3
lcl|NC_009525.1_cds_WP_003900173.1_595	419947.MRA_0574	4.58e-246	675.0	COG0500@1|root,COG2226@2|Bacteria,2GRM0@201174|Actinobacteria,23F8M@1762|Mycobacteriaceae	201174|Actinobacteria	Q	Dimerisation domain	-	-	-	-	-	-	-	-	-	-	-	-	Dimerisation2,Methyltransf_2
lcl|NC_009525.1_cds_WP_003402992.1_596	419947.MRA_0575	0.0	902.0	COG2124@1|root,COG2124@2|Bacteria,2GK4Z@201174|Actinobacteria,233IE@1762|Mycobacteriaceae	201174|Actinobacteria	C	cytochrome p450	cyp135B1	GO:0003674,GO:0003824,GO:0005575,GO:0005622,GO:0005623,GO:0005737,GO:0005829,GO:0006629,GO:0008150,GO:0008152,GO:0008202,GO:0016125,GO:0016491,GO:0044238,GO:0044424,GO:0044444,GO:0044464,GO:0055114,GO:0071704,GO:1901360,GO:1901615	-	-	-	-	-	-	-	-	-	-	p450
lcl|NC_009525.1_cds_WP_003403001.1_599	419947.MRA_0578	1.88e-316	862.0	COG1073@1|root,COG1926@1|root,COG1073@2|Bacteria,COG1926@2|Bacteria,2GJUU@201174|Actinobacteria,236TQ@1762|Mycobacteriaceae	201174|Actinobacteria	S	phosphoribosyl transferase	-	GO:0005575,GO:0005618,GO:0005622,GO:0005623,GO:0005737,GO:0005829,GO:0030312,GO:0044424,GO:0044444,GO:0044464,GO:0071944	-	ko:K07100	-	-	-	-	ko00000	-	-	-	DLH,Pribosyltran
lcl|NC_009525.1_cds_WP_003911226.1_600	419947.MRA_0579	2.09e-76	228.0	2BGCK@1|root,32AAA@2|Bacteria,2GPT5@201174|Actinobacteria,23ATZ@1762|Mycobacteriaceae	201174|Actinobacteria	-	-	-	-	-	-	-	-	-	-	-	-	-	-	-
lcl|NC_009525.1_cds_WP_003403007.1_601	419947.MRA_0580	0.0	908.0	COG1488@1|root,COG1488@2|Bacteria,2GJAT@201174|Actinobacteria,23CRY@1762|Mycobacteriaceae	201174|Actinobacteria	F	Catalyzes the synthesis of beta-nicotinate D- ribonucleotide from nicotinate and 5-phospho-D-ribose 1-phosphate at the expense of ATP	-	GO:0001666,GO:0003674,GO:0003824,GO:0004516,GO:0005575,GO:0005623,GO:0005886,GO:0006139,GO:0006725,GO:0006732,GO:0006733,GO:0006753,GO:0006793,GO:0006796,GO:0006807,GO:0006950,GO:0008150,GO:0008152,GO:0009058,GO:0009108,GO:0009117,GO:0009165,GO:0009435,GO:0009605,GO:0009607,GO:0009628,GO:0009987,GO:0016020,GO:0016740,GO:0016757,GO:0016763,GO:0016874,GO:0016879,GO:0018130,GO:0019359,GO:0019362,GO:…	6.3.4.21	ko:K00763	ko00760,ko01100,map00760,map01100	-	R01724	RC00033	ko00000,ko00001,ko01000	-	-	-	NAPRTase,QRPTase_C
lcl|NC_009525.1_cds_WP_003898508.1_603	419947.MRA_0582	2.17e-287	784.0	COG0654@1|root,COG0654@2|Bacteria,2GJ9V@201174|Actinobacteria,232PJ@1762|Mycobacteriaceae	201174|Actinobacteria	CH	FAD binding domain	-	-	-	-	-	-	-	-	-	-	-	-	FAD_binding_3
lcl|NC_009525.1_cds_WP_003900174.1_604	419947.MRA_0583	8.72e-315	857.0	COG0640@1|root,COG3832@1|root,COG0640@2|Bacteria,COG3832@2|Bacteria,2GSCI@201174|Actinobacteria,237T4@1762|Mycobacteriaceae	201174|Actinobacteria	K	Transcriptional regulator	-	-	-	-	-	-	-	-	-	-	-	-	AHSA1,HTH_5,MDMPI_N
lcl|NC_009525.1_cds_WP_003898511.1_607	419947.MRA_0586	6.64e-184	511.0	COG1656@1|root,COG1656@2|Bacteria,2GMQR@201174|Actinobacteria,23528@1762|Mycobacteriaceae	201174|Actinobacteria	S	Mut7-C ubiquitin	-	-	-	ko:K09122	-	-	-	-	ko00000	-	-	-	Mut7-C,Ub-Mut7C
lcl|NC_009525.1_cds_WP_003403017.1_608	419947.MRA_0587	6.28e-111	319.0	2E8H6@1|root,332VD@2|Bacteria,2II1R@201174|Actinobacteria,238XJ@1762|Mycobacteriaceae	201174|Actinobacteria	-	-	-	-	-	-	-	-	-	-	-	-	-	-	F420H2_quin_red
lcl|NC_009525.1_cds_WP_003403055.1_612	419947.MRA_0591	0.0	1764.0	COG3537@1|root,COG3537@2|Bacteria,2GKYM@201174|Actinobacteria,237KE@1762|Mycobacteriaceae	201174|Actinobacteria	G	Glycosyl hydrolase family 92	-	GO:0000224,GO:0003674,GO:0003824,GO:0005575,GO:0005622,GO:0005623,GO:0005737,GO:0005829,GO:0006464,GO:0006508,GO:0006515,GO:0006516,GO:0006517,GO:0006807,GO:0008150,GO:0008152,GO:0009056,GO:0009057,GO:0009100,GO:0009987,GO:0016787,GO:0016810,GO:0016811,GO:0019538,GO:0030163,GO:0036211,GO:0043170,GO:0043412,GO:0044237,GO:0044238,GO:0044248,GO:0044257,GO:0044260,GO:0044265,GO:0044267,GO:0044424,GO:…	-	-	-	-	-	-	-	-	-	-	Glyco_hydro_92
lcl|NC_009525.1_cds_WP_003900178.1_613	419947.MRA_0592	0.0	1489.0	COG0392@1|root,COG0392@2|Bacteria,2GMAV@201174|Actinobacteria,234XJ@1762|Mycobacteriaceae	201174|Actinobacteria	T	integral membrane protein	-	-	-	ko:K07027	-	-	-	-	ko00000,ko02000	4.D.2	-	-	LPG_synthase_TM
lcl|NC_009525.1_cds_WP_003403095.1_615	419947.MRA_0594	4.58e-177	494.0	COG0767@1|root,COG0767@2|Bacteria,2GXR8@201174|Actinobacteria,2329K@1762|Mycobacteriaceae	201174|Actinobacteria	Q	ABC-type transport system involved in resistance to organic solvents, permease component	yrbE1A	-	-	ko:K02066	ko02010,map02010	M00210,M00669,M00670	-	-	ko00000,ko00001,ko00002,ko02000	3.A.1.27	-	-	MlaE
lcl|NC_009525.1_cds_WP_003915845.1_617	419947.MRA_0596	4.98e-292	797.0	COG1463@1|root,COG1463@2|Bacteria,2GNXB@201174|Actinobacteria,233R8@1762|Mycobacteriaceae	201174|Actinobacteria	Q	Virulence factor Mce family protein	mce2A	-	-	ko:K02067	ko02010,map02010	M00210,M00669,M00670	-	-	ko00000,ko00001,ko00002,ko02000	3.A.1.27	-	-	Mce4_CUP1,MlaD
lcl|NC_009525.1_cds_WP_003900181.1_619	419947.MRA_0599	4.15e-291	801.0	COG1463@1|root,COG1463@2|Bacteria,2H381@201174|Actinobacteria,23D1Y@1762|Mycobacteriaceae	201174|Actinobacteria	Q	MlaD protein	mce2C	-	-	ko:K02067	ko02010,map02010	M00210,M00669,M00670	-	-	ko00000,ko00001,ko00002,ko02000	3.A.1.27	-	-	MlaD
lcl|NC_009525.1_cds_WP_003403119.1_622	419947.MRA_0602	0.0	1010.0	COG1463@1|root,COG1463@2|Bacteria,2GNEP@201174|Actinobacteria,23D66@1762|Mycobacteriaceae	201174|Actinobacteria	Q	MlaD protein	mce2F	-	-	ko:K02067	ko02010,map02010	M00210,M00669,M00670	-	-	ko00000,ko00001,ko00002,ko02000	3.A.1.27	-	-	Mce4_CUP1,MlaD
lcl|NC_009525.1_cds_WP_003403125.1_624	419947.MRA_0604	2.09e-54	170.0	COG4118@1|root,COG4118@2|Bacteria,2GWS1@201174|Actinobacteria	201174|Actinobacteria	D	Antitoxin component of a toxin-antitoxin (TA) module	-	GO:0003674,GO:0005488,GO:0005515,GO:0008150,GO:0040008,GO:0045927,GO:0048518,GO:0050789,GO:0065007,GO:0097351	-	-	-	-	-	-	-	-	-	-	PhdYeFM_antitox
lcl|NC_009525.1_cds_WP_003403128.1_625	419947.MRA_0605	2.58e-293	801.0	COG1373@1|root,COG1373@2|Bacteria,2GK1Q@201174|Actinobacteria,23D8N@1762|Mycobacteriaceae	201174|Actinobacteria	S	Contains PS00017 ATP GTP-binding site motif A (P-loop). This region is a	-	-	-	ko:K07133	-	-	-	-	ko00000	-	-	-	AAA_14,DUF4143
lcl|NC_009525.1_cds_WP_003900973.1_628	1123023.JIAI01000001_gene6660	7.06e-31	123.0	COG0642@1|root,COG2205@2|Bacteria,2GNUQ@201174|Actinobacteria	201174|Actinobacteria	T	Histidine kinase	-	-	-	-	-	-	-	-	-	-	-	-	HAMP,HATPase_c,HisKA
lcl|NC_009525.1_cds_WP_003900184.1_632	419947.MRA_0611	3.25e-223	615.0	COG1388@1|root,COG1388@2|Bacteria,2IAJY@201174|Actinobacteria	201174|Actinobacteria	M	Domain of Unknown Function (DUF1259)	lpqO	-	-	-	-	-	-	-	-	-	-	-	DUF1529
lcl|NC_009525.1_cds_WP_003898526.1_642	419947.MRA_0621	9.89e-138	390.0	29FX3@1|root,302US@2|Bacteria,2IIAT@201174|Actinobacteria,23ABF@1762|Mycobacteriaceae	201174|Actinobacteria	-	-	-	-	-	-	-	-	-	-	-	-	-	-	-
lcl|NC_009525.1_cds_WP_003900188.1_643	419947.MRA_0622	0.0	1690.0	COG3012@1|root,COG3012@2|Bacteria,2GMRR@201174|Actinobacteria,234MG@1762|Mycobacteriaceae	201174|Actinobacteria	S	SEC-C motif	-	-	-	-	-	-	-	-	-	-	-	-	SEC-C
lcl|NC_009525.1_cds_WP_003898528.1_644	419947.MRA_0623	6.45e-163	461.0	28N42@1|root,2ZB9M@2|Bacteria,2IGGN@201174|Actinobacteria,238Z9@1762|Mycobacteriaceae	201174|Actinobacteria	-	-	-	-	-	-	-	-	-	-	-	-	-	-	Amidase_6
lcl|NC_009525.1_cds_WP_003906403.1_650	419947.MRA_0629	5.59e-250	687.0	COG0153@1|root,COG0153@2|Bacteria,2GJXI@201174|Actinobacteria,235TB@1762|Mycobacteriaceae	201174|Actinobacteria	G	Belongs to the GHMP kinase family. GalK subfamily	galK	-	2.7.1.6,2.7.7.12	ko:K00849,ko:K00965	ko00052,ko00520,ko01100,ko04917,map00052,map00520,map01100,map04917	M00362,M00554,M00632	R00955,R01092	RC00002,RC00078	ko00000,ko00001,ko00002,ko01000,ko04147	-	-	-	GHMP_kinases_C,GHMP_kinases_N,GalKase_gal_bdg
lcl|NC_009525.1_cds_WP_003898532.1_651	419947.MRA_0630	8.3e-252	691.0	COG1520@1|root,COG1520@2|Bacteria,2IBDZ@201174|Actinobacteria,236PD@1762|Mycobacteriaceae	201174|Actinobacteria	S	Part of the outer membrane protein assembly complex, which is involved in assembly and insertion of beta-barrel proteins into the outer membrane	-	-	-	-	-	-	-	-	-	-	-	-	PQQ_2,zinc_ribbon_2
lcl|NC_009525.1_cds_WP_003403246.1_657	419947.MRA_0636	4.2e-82	244.0	COG1487@1|root,COG1487@2|Bacteria,2HS2Z@201174|Actinobacteria,23AAZ@1762|Mycobacteriaceae	201174|Actinobacteria	S	Toxic component of a toxin-antitoxin (TA) module. An RNase	-	GO:0000287,GO:0003674,GO:0003824,GO:0004518,GO:0004519,GO:0004521,GO:0004540,GO:0005488,GO:0005575,GO:0005576,GO:0006139,GO:0006725,GO:0006807,GO:0008150,GO:0008152,GO:0009987,GO:0016070,GO:0016787,GO:0016788,GO:0034641,GO:0040007,GO:0043167,GO:0043169,GO:0043170,GO:0044237,GO:0044238,GO:0046483,GO:0046872,GO:0071704,GO:0090304,GO:0090305,GO:0090501,GO:0090502,GO:0140098,GO:1901360	-	-	-	-	-	-	-	-	-	-	PIN
lcl|NC_009525.1_cds_WP_003403248.1_658	419947.MRA_0637	2.57e-272	745.0	COG4398@1|root,COG4398@2|Bacteria,2I3VH@201174|Actinobacteria,23DA2@1762|Mycobacteriaceae	201174|Actinobacteria	S	FIST C domain	-	GO:0008150,GO:0040007	-	-	-	-	-	-	-	-	-	-	FIST,FIST_C
lcl|NC_009525.1_cds_WP_003900979.1_659	419947.MRA_0638	0.0	1090.0	COG0507@1|root,COG0507@2|Bacteria,2GIX1@201174|Actinobacteria,233JH@1762|Mycobacteriaceae	201174|Actinobacteria	L	A helicase nuclease that prepares dsDNA breaks (DSB) for recombinational DNA repair. Binds to DSBs and unwinds DNA via a highly rapid and processive ATP-dependent bidirectional helicase activity. Unwinds dsDNA until it encounters a Chi (crossover hotspot instigator) sequence from the 3' direction. Cuts ssDNA a few nucleotides 3' to the Chi site. The properties and activities of the enzyme are cha…	recD	GO:0005575,GO:0005618,GO:0005622,GO:0005623,GO:0005737,GO:0005829,GO:0005886,GO:0016020,GO:0030312,GO:0044424,GO:0044444,GO:0044464,GO:0071944	3.1.11.5	ko:K03581	ko03440,map03440	-	-	-	ko00000,ko00001,ko01000,ko03400	-	-	-	AAA_30,UvrD_C_2
lcl|NC_009525.1_cds_WP_003905355.1_660	419947.MRA_0639	0.0	2150.0	COG1074@1|root,COG1074@2|Bacteria,2GNKH@201174|Actinobacteria,232R7@1762|Mycobacteriaceae	201174|Actinobacteria	L	A helicase nuclease that prepares dsDNA breaks (DSB) for recombinational DNA repair. Binds to DSBs and unwinds DNA via a highly rapid and processive ATP-dependent bidirectional helicase activity. Unwinds dsDNA until it encounters a Chi (crossover hotspot instigator) sequence from the 3' direction. Cuts ssDNA a few nucleotides 3' to the Chi site. The properties and activities of the enzyme are cha…	recB	GO:0005575,GO:0005618,GO:0005622,GO:0005623,GO:0005737,GO:0005829,GO:0005886,GO:0016020,GO:0030312,GO:0044424,GO:0044444,GO:0044464,GO:0071944	3.1.11.5	ko:K03582	ko03440,map03440	-	-	-	ko00000,ko00001,ko01000,ko03400	-	-	-	PDDEXK_1,UvrD-helicase,UvrD_C
lcl|NC_009525.1_cds_WP_003900193.1_661	419947.MRA_0640	0.0	2211.0	COG1330@1|root,COG1330@2|Bacteria,2GNVB@201174|Actinobacteria,233WA@1762|Mycobacteriaceae	201174|Actinobacteria	L	A helicase nuclease that prepares dsDNA breaks (DSB) for recombinational DNA repair. Binds to DSBs and unwinds DNA via a highly rapid and processive ATP-dependent bidirectional helicase activity. Unwinds dsDNA until it encounters a Chi (crossover hotspot instigator) sequence from the 3' direction. Cuts ssDNA a few nucleotides 3' to the Chi site. The properties and activities of the enzyme are cha…	recC	GO:0003674,GO:0003678,GO:0003824,GO:0004003,GO:0004386,GO:0004518,GO:0004519,GO:0005575,GO:0005576,GO:0005618,GO:0005623,GO:0005886,GO:0006139,GO:0006259,GO:0006281,GO:0006302,GO:0006310,GO:0006725,GO:0006807,GO:0006950,GO:0006974,GO:0006996,GO:0008026,GO:0008094,GO:0008150,GO:0008152,GO:0009987,GO:0016020,GO:0016043,GO:0016462,GO:0016787,GO:0016788,GO:0016817,GO:0016818,GO:0016887,GO:0017111,GO:…	3.1.11.5	ko:K03583	ko03440,map03440	-	-	-	ko00000,ko00001,ko01000,ko03400	-	-	-	Exonuc_V_gamma
lcl|NC_009525.1_cds_WP_003903106.1_668	419947.MRA_0647	8.01e-97	281.0	COG2030@1|root,COG2030@2|Bacteria,2IFCJ@201174|Actinobacteria,238KF@1762|Mycobacteriaceae	201174|Actinobacteria	I	Functions as a heterodimer along with HadA or HadC in fatty acid biosynthesis	hadB	-	-	-	-	-	-	-	-	-	-	-	MaoC_dehydratas
lcl|NC_009525.1_cds_WP_003900195.1_674	419947.MRA_0653	5.21e-226	621.0	COG2230@1|root,COG2230@2|Bacteria,2IA3R@201174|Actinobacteria,233JK@1762|Mycobacteriaceae	201174|Actinobacteria	M	synthase	mmaA4	GO:0003674,GO:0003824,GO:0005575,GO:0005618,GO:0005623,GO:0005886,GO:0006082,GO:0006629,GO:0006631,GO:0006633,GO:0008150,GO:0008152,GO:0008168,GO:0008610,GO:0008757,GO:0009058,GO:0009059,GO:0009273,GO:0009987,GO:0016020,GO:0016053,GO:0016740,GO:0016741,GO:0019752,GO:0030312,GO:0032259,GO:0032787,GO:0034645,GO:0042546,GO:0043170,GO:0043436,GO:0044036,GO:0044038,GO:0044085,GO:0044237,GO:0044238,GO:…	2.1.1.79	ko:K00574	-	-	-	-	ko00000,ko01000	-	-	-	CMAS
lcl|NC_009525.1_cds_WP_003900985.1_676	419947.MRA_0655	2.27e-213	588.0	COG2230@1|root,COG2230@2|Bacteria,2GKIA@201174|Actinobacteria,232Q2@1762|Mycobacteriaceae	201174|Actinobacteria	M	synthase	mmaA5	GO:0003674,GO:0003824,GO:0005575,GO:0005618,GO:0005623,GO:0005886,GO:0006082,GO:0006629,GO:0006631,GO:0006633,GO:0008150,GO:0008152,GO:0008168,GO:0008610,GO:0008757,GO:0008825,GO:0009058,GO:0009059,GO:0009273,GO:0009987,GO:0016020,GO:0016053,GO:0016740,GO:0016741,GO:0019752,GO:0030312,GO:0032259,GO:0032787,GO:0034645,GO:0042546,GO:0043170,GO:0043436,GO:0044036,GO:0044038,GO:0044085,GO:0044237,GO:…	2.1.1.79	ko:K00574	-	-	-	-	ko00000,ko01000	-	-	-	CMAS
lcl|NC_009525.1_cds_WP_003403314.1_678	419947.MRA_0657	2.56e-217	599.0	COG2267@1|root,COG2267@2|Bacteria,2GMY4@201174|Actinobacteria,234WX@1762|Mycobacteriaceae	201174|Actinobacteria	I	Alpha beta hydrolase	lipG	-	-	-	-	-	-	-	-	-	-	-	Abhydrolase_1
lcl|NC_009525.1_cds_WP_003904450.1_679	419947.MRA_0658	0.0	887.0	COG0661@1|root,COG0661@2|Bacteria,2GJQ6@201174|Actinobacteria,2358M@1762|Mycobacteriaceae	201174|Actinobacteria	S	unusual protein kinase	-	GO:0005575,GO:0005618,GO:0005622,GO:0005623,GO:0005737,GO:0005829,GO:0005886,GO:0016020,GO:0030312,GO:0044424,GO:0044444,GO:0044464,GO:0071944	-	-	-	-	-	-	-	-	-	-	ABC1,APH
lcl|NC_009525.1_cds_MRA_RS03425_680	419947.MRA_0659	0.0	2450.0	COG0383@1|root,COG0383@2|Bacteria,2GM02@201174|Actinobacteria,233U3@1762|Mycobacteriaceae	201174|Actinobacteria	G	alpha-mannosidase	-	-	-	-	-	-	-	-	-	-	-	-	Alpha-mann_mid,Glyco_hydro_38,Glyco_hydro_38C,NPCBM_assoc
lcl|NC_009525.1_cds_WP_003898547.1_695	419947.MRA_0673	0.0	1637.0	COG3119@1|root,COG3119@2|Bacteria,2GJ8H@201174|Actinobacteria,233CA@1762|Mycobacteriaceae	201174|Actinobacteria	P	thought to play an important role in the mineralization of sulfates catalytic activity a phenol sulfate H2O a phenol sulfate	atsD	GO:0000323,GO:0001775,GO:0002252,GO:0002263,GO:0002274,GO:0002275,GO:0002283,GO:0002366,GO:0002376,GO:0002443,GO:0002444,GO:0002446,GO:0003674,GO:0003824,GO:0004065,GO:0004098,GO:0005488,GO:0005509,GO:0005575,GO:0005576,GO:0005622,GO:0005623,GO:0005737,GO:0005764,GO:0005766,GO:0005773,GO:0005775,GO:0005783,GO:0005788,GO:0006629,GO:0006643,GO:0006664,GO:0006665,GO:0006687,GO:0006807,GO:0006810,GO:…	3.1.6.1	ko:K01130	ko00140,ko00600,map00140,map00600	-	R03980,R04856	RC00128,RC00231	ko00000,ko00001,ko01000	-	-	-	Sulfatase
lcl|NC_009525.1_cds_WP_003403413.1_700	419947.MRA_0677	0.0	2563.0	COG0086@1|root,COG0086@2|Bacteria,2GKWF@201174|Actinobacteria,232M3@1762|Mycobacteriaceae	201174|Actinobacteria	K	DNA-dependent RNA polymerase catalyzes the transcription of DNA into RNA using the four ribonucleoside triphosphates as substrates	rpoC	GO:0000428,GO:0005575,GO:0005618,GO:0005622,GO:0005623,GO:0005886,GO:0008150,GO:0016020,GO:0030312,GO:0030880,GO:0032991,GO:0040007,GO:0044424,GO:0044464,GO:0061695,GO:0071944,GO:1902494,GO:1990234	2.7.7.6	ko:K03046	ko00230,ko00240,ko01100,ko03020,map00230,map00240,map01100,map03020	M00183	R00435,R00441,R00442,R00443	RC02795	br01611,ko00000,ko00001,ko00002,ko01000,ko03021,ko03400	-	-	-	RNA_pol_Rpb1_1,RNA_pol_Rpb1_2,RNA_pol_Rpb1_3,RNA_pol_Rpb1_4,RNA_pol_Rpb1_5
lcl|NC_009525.1_cds_WP_003900995.1_702	419947.MRA_0679	0.0	1289.0	KOG2232@1|root,2Z84X@2|Bacteria,2GS3B@201174|Actinobacteria,235F9@1762|Mycobacteriaceae	201174|Actinobacteria	S	Neutral/alkaline non-lysosomal ceramidase, C-terminal	-	GO:0001676,GO:0003674,GO:0003824,GO:0005575,GO:0005618,GO:0005623,GO:0006066,GO:0006082,GO:0006629,GO:0006631,GO:0006633,GO:0006643,GO:0006665,GO:0006670,GO:0006672,GO:0006807,GO:0008150,GO:0008152,GO:0008610,GO:0009056,GO:0009058,GO:0009987,GO:0016042,GO:0016053,GO:0016787,GO:0016810,GO:0016811,GO:0017040,GO:0019751,GO:0019752,GO:0030148,GO:0030149,GO:0030312,GO:0032787,GO:0034311,GO:0034312,GO:…	3.5.1.23	ko:K12349	ko00600,ko01100,ko04071,map00600,map01100,map04071	M00099	R01494	RC00064,RC00328	ko00000,ko00001,ko00002,ko01000	-	-	-	Ceramidase_alk,Ceramidse_alk_C
lcl|NC_009525.1_cds_WP_003403426.1_706	419947.MRA_0683	2.59e-227	625.0	COG1024@1|root,COG1024@2|Bacteria,2GN3P@201174|Actinobacteria,233AK@1762|Mycobacteriaceae	201174|Actinobacteria	I	Enoyl-CoA hydratase	echA4	-	4.2.1.17	ko:K01692	ko00071,ko00280,ko00281,ko00310,ko00360,ko00362,ko00380,ko00410,ko00627,ko00640,ko00650,ko00903,ko00930,ko01100,ko01110,ko01120,ko01130,ko01212,map00071,map00280,map00281,map00310,map00360,map00362,map00380,map00410,map00627,map00640,map00650,map00903,map00930,map01100,map01110,map01120,map01130,map01212	M00032,M00087	R03026,R03045,R04137,R04170,R04204,R04224,R04738,R04740,R04744,R04746,R04749,R05595,R06411,R06412,R06942,R08093	RC00831,RC00834,RC01086,RC01095,RC01098,RC01103,RC01217,RC02115	ko00000,ko00001,ko00002,ko01000	-	-	-	ECH_1
lcl|NC_009525.1_cds_WP_003403433.1_708	419947.MRA_0685	7.71e-184	511.0	COG1024@1|root,COG1024@2|Bacteria,2GJ63@201174|Actinobacteria,232R8@1762|Mycobacteriaceae	201174|Actinobacteria	I	Belongs to the enoyl-CoA hydratase isomerase family	echA5	-	4.2.1.17	ko:K01692	ko00071,ko00280,ko00281,ko00310,ko00360,ko00362,ko00380,ko00410,ko00627,ko00640,ko00650,ko00903,ko00930,ko01100,ko01110,ko01120,ko01130,ko01212,map00071,map00280,map00281,map00310,map00360,map00362,map00380,map00410,map00627,map00640,map00650,map00903,map00930,map01100,map01110,map01120,map01130,map01212	M00032,M00087	R03026,R03045,R04137,R04170,R04204,R04224,R04738,R04740,R04744,R04746,R04749,R05595,R06411,R06412,R06942,R08093	RC00831,RC00834,RC01086,RC01095,RC01098,RC01103,RC01217,RC02115	ko00000,ko00001,ko00002,ko01000	-	-	-	ECH_1
lcl|NC_009525.1_cds_WP_009935604.1_709	419947.MRA_0686	0.0	1722.0	COG1033@1|root,COG2409@1|root,COG1033@2|Bacteria,COG2409@2|Bacteria,2GKX6@201174|Actinobacteria,232PC@1762|Mycobacteriaceae	201174|Actinobacteria	S	transport protein	mmpL5	GO:0005575,GO:0005576,GO:0005622,GO:0005623,GO:0005737,GO:0005829,GO:0005886,GO:0005887,GO:0016020,GO:0016021,GO:0031224,GO:0031226,GO:0044424,GO:0044425,GO:0044444,GO:0044459,GO:0044464,GO:0071944	-	ko:K06994	-	-	-	-	ko00000	-	-	-	MMPL
lcl|NC_009525.1_cds_WP_003403442.1_711	419947.MRA_0687A	1.04e-110	318.0	COG1510@1|root,COG1510@2|Bacteria,2IA6R@201174|Actinobacteria,239CU@1762|Mycobacteriaceae	201174|Actinobacteria	K	regulation of RNA biosynthetic process	-	-	-	-	-	-	-	-	-	-	-	-	MarR_2
lcl|NC_009525.1_cds_WP_003403448.1_713	419947.MRA_0689	1.58e-83	246.0	295VX@1|root,31MF4@2|Bacteria,2IN3P@201174|Actinobacteria,23A11@1762|Mycobacteriaceae	201174|Actinobacteria	S	Protein of unknown function (DUF3060)	-	-	-	-	-	-	-	-	-	-	-	-	DUF3060
lcl|NC_009525.1_cds_WP_003898554.1_717	419947.MRA_0693	0.0	1377.0	COG0480@1|root,COG0480@2|Bacteria,2GKB3@201174|Actinobacteria,234DS@1762|Mycobacteriaceae	201174|Actinobacteria	J	Catalyzes the GTP-dependent ribosomal translocation step during translation elongation. During this step, the ribosome changes from the pre-translocational (PRE) to the post- translocational (POST) state as the newly formed A-site-bound peptidyl-tRNA and P-site-bound deacylated tRNA move to the P and E sites, respectively. Catalyzes the coordinated movement of the two tRNA molecules, the mRNA and…	fusA	GO:0005575,GO:0005618,GO:0005623,GO:0005886,GO:0008150,GO:0016020,GO:0030312,GO:0040007,GO:0044464,GO:0071944	-	ko:K02355	-	-	-	-	ko00000,ko03012,ko03029	-	-	-	EFG_C,EFG_II,EFG_IV,GTP_EFTU,GTP_EFTU_D2
lcl|NC_009525.1_cds_WP_003403465.1_719	419947.MRA_0695	4.03e-171	479.0	2EZZU@1|root,33T3V@2|Bacteria,2GNV4@201174|Actinobacteria,233WD@1762|Mycobacteriaceae	201174|Actinobacteria	-	-	-	-	-	-	-	-	-	-	-	-	-	-	SHOCT
lcl|NC_009525.1_cds_WP_003901000.1_721	419947.MRA_0697	6.8e-291	794.0	COG0446@1|root,COG0446@2|Bacteria,2GJKT@201174|Actinobacteria,2339N@1762|Mycobacteriaceae	201174|Actinobacteria	S	Pyridine nucleotide-disulphide oxidoreductase	-	GO:0003674,GO:0003824,GO:0005575,GO:0005622,GO:0005623,GO:0005634,GO:0005737,GO:0005739,GO:0005740,GO:0005743,GO:0005758,GO:0005829,GO:0006323,GO:0006915,GO:0006919,GO:0006950,GO:0006996,GO:0007005,GO:0007154,GO:0007165,GO:0007275,GO:0007399,GO:0008150,GO:0008152,GO:0008219,GO:0009893,GO:0009987,GO:0010257,GO:0010604,GO:0010941,GO:0010942,GO:0010950,GO:0010952,GO:0012501,GO:0016020,GO:0016043,GO:…	1.18.1.3	ko:K00529	ko00071,ko00360,ko01120,ko01220,map00071,map00360,map01120,map01220	M00545	R02000,R06782,R06783	RC00098	br01602,ko00000,ko00001,ko00002,ko01000	-	-	-	Pyr_redox_2,Reductase_C
lcl|NC_009525.1_cds_WP_003403482.1_725	419947.MRA_0700	2.01e-140	396.0	COG1309@1|root,COG1309@2|Bacteria,2HFWX@201174|Actinobacteria,234FY@1762|Mycobacteriaceae	201174|Actinobacteria	K	Transcriptional regulator	mftR	GO:0000976,GO:0001067,GO:0003674,GO:0003676,GO:0003677,GO:0003690,GO:0003700,GO:0005488,GO:0005575,GO:0005622,GO:0005623,GO:0005737,GO:0005829,GO:0006355,GO:0008150,GO:0009889,GO:0010468,GO:0010556,GO:0019219,GO:0019222,GO:0031323,GO:0031326,GO:0043565,GO:0044212,GO:0044424,GO:0044444,GO:0044464,GO:0050789,GO:0050794,GO:0051171,GO:0051252,GO:0060255,GO:0065007,GO:0080090,GO:0097159,GO:0140110,GO:…	-	-	-	-	-	-	-	-	-	-	TetR_N
lcl|NC_009525.1_cds_WP_003403490.1_728	419947.MRA_0701	5.38e-294	801.0	COG0535@1|root,COG0535@2|Bacteria,2GNSY@201174|Actinobacteria,235P4@1762|Mycobacteriaceae	201174|Actinobacteria	C	Radical SAM	pqqE	GO:0005575,GO:0005623,GO:0005886,GO:0016020,GO:0044464,GO:0071944	-	-	-	-	-	-	-	-	-	-	Fer4_12,Radical_SAM,SPASM
lcl|NC_009525.1_cds_WP_003898557.1_729	419947.MRA_0702	5.52e-285	778.0	COG1304@1|root,COG1304@2|Bacteria,2GJA5@201174|Actinobacteria,233AN@1762|Mycobacteriaceae	201174|Actinobacteria	C	Dehydrogenase	lldD1	GO:0005575,GO:0005623,GO:0005886,GO:0016020,GO:0044464,GO:0071944	1.1.2.3,1.1.3.15	ko:K00101,ko:K00104	ko00620,ko00630,ko01100,ko01110,ko01120,ko01130,map00620,map00630,map01100,map01110,map01120,map01130	-	R00196,R00475	RC00042,RC00044	ko00000,ko00001,ko01000	-	-	iNJ661.Rv0694	FMN_dh
lcl|NC_009525.1_cds_WP_003403497.1_730	419947.MRA_0703	2.92e-182	506.0	COG1402@1|root,COG1402@2|Bacteria,2HCRK@201174|Actinobacteria,2359K@1762|Mycobacteriaceae	201174|Actinobacteria	S	creatinine amidohydrolase family protein	mftE	-	3.5.2.10	ko:K01470	ko00330,map00330	-	R01884	RC00615	ko00000,ko00001,ko01000	-	-	-	Creatininase
lcl|NC_009525.1_cds_WP_003898561.1_747	419947.MRA_0719	0.0	1645.0	COG3119@1|root,COG3119@2|Bacteria,2GJ8H@201174|Actinobacteria,234H7@1762|Mycobacteriaceae	201174|Actinobacteria	P	Arylsulfatase	atsA	GO:0000323,GO:0001775,GO:0002252,GO:0002263,GO:0002274,GO:0002275,GO:0002283,GO:0002366,GO:0002376,GO:0002443,GO:0002444,GO:0002446,GO:0003674,GO:0003824,GO:0004065,GO:0004098,GO:0005488,GO:0005509,GO:0005575,GO:0005576,GO:0005622,GO:0005623,GO:0005737,GO:0005764,GO:0005766,GO:0005773,GO:0005775,GO:0005783,GO:0005788,GO:0006629,GO:0006643,GO:0006664,GO:0006665,GO:0006687,GO:0006807,GO:0006810,GO:…	3.1.6.1	ko:K01130	ko00140,ko00600,map00140,map00600	-	R03980,R04856	RC00128,RC00231	ko00000,ko00001,ko01000	-	-	-	Sulfatase
lcl|NC_009525.1_cds_WP_003898562.1_749	419947.MRA_0721	2.3e-226	623.0	2E1SP@1|root,32V34@2|Bacteria,2I88S@201174|Actinobacteria,23310@1762|Mycobacteriaceae	201174|Actinobacteria	S	Domain of unknown function (DUF4436)	-	-	-	-	-	-	-	-	-	-	-	-	DUF4436
lcl|NC_009525.1_cds_WP_003898563.1_759	419947.MRA_0731	1.8e-95	278.0	COG0200@1|root,COG0200@2|Bacteria,2II6M@201174|Actinobacteria,238NI@1762|Mycobacteriaceae	201174|Actinobacteria	J	Binds to the 23S rRNA	rplO	GO:0003674,GO:0003735,GO:0005198,GO:0005575,GO:0005622,GO:0005623,GO:0005737,GO:0005829,GO:0005840,GO:0005886,GO:0015934,GO:0016020,GO:0022625,GO:0022626,GO:0032991,GO:0043226,GO:0043228,GO:0043229,GO:0043232,GO:0044391,GO:0044422,GO:0044424,GO:0044444,GO:0044445,GO:0044446,GO:0044464,GO:0071944,GO:1990904	-	ko:K02876	ko03010,map03010	M00178,M00179	-	-	br01610,ko00000,ko00001,ko00002,ko03011	-	-	-	Ribosomal_L27A
lcl|NC_009525.1_cds_WP_003403686.1_760	419947.MRA_0732	0.0	1157.0	COG0616@1|root,COG0616@2|Bacteria,2HQDG@201174|Actinobacteria,2358Q@1762|Mycobacteriaceae	201174|Actinobacteria	OU	signal peptide peptidase SppA, 67K type	sppA	-	-	ko:K04773,ko:K04774	-	-	-	-	ko00000,ko01000,ko01002	-	-	-	Peptidase_S49
lcl|NC_009525.1_cds_WP_003911249.1_763	419947.MRA_0735	1.11e-156	439.0	COG0235@1|root,COG0235@2|Bacteria,2GNI6@201174|Actinobacteria,235JB@1762|Mycobacteriaceae	201174|Actinobacteria	G	Aldolase	fucA	GO:0003674,GO:0003824,GO:0005488,GO:0005575,GO:0005622,GO:0005623,GO:0005737,GO:0005829,GO:0005975,GO:0005996,GO:0006793,GO:0006796,GO:0008150,GO:0008152,GO:0008270,GO:0008742,GO:0009056,GO:0009058,GO:0009987,GO:0016052,GO:0016829,GO:0016830,GO:0016832,GO:0016853,GO:0016854,GO:0016857,GO:0019321,GO:0019323,GO:0019324,GO:0019566,GO:0019568,GO:0019569,GO:0019572,GO:0019637,GO:0043167,GO:0043169,GO:…	4.1.1.104,4.1.2.17,5.1.3.4	ko:K01628,ko:K03077,ko:K22130	ko00040,ko00051,ko00053,ko01100,ko01120,map00040,map00051,map00053,map01100,map01120	M00550	R02262,R05850	RC00603,RC00604,RC01479	ko00000,ko00001,ko00002,ko01000	-	-	-	Aldolase_II
lcl|NC_009525.1_cds_WP_003898565.1_764	419947.MRA_0736	1.69e-230	635.0	COG0111@1|root,COG0111@2|Bacteria,2GIZV@201174|Actinobacteria,236W4@1762|Mycobacteriaceae	201174|Actinobacteria	EH	Belongs to the D-isomer specific 2-hydroxyacid dehydrogenase family	serA2	-	1.1.1.399,1.1.1.95	ko:K00058	ko00260,ko00680,ko01100,ko01120,ko01130,ko01200,ko01230,map00260,map00680,map01100,map01120,map01130,map01200,map01230	M00020	R01513	RC00031	ko00000,ko00001,ko00002,ko01000,ko04147	-	-	-	2-Hacid_dh,2-Hacid_dh_C
lcl|NC_009525.1_cds_WP_003900204.1_765	419947.MRA_0737	0.0	875.0	COG1070@1|root,COG1070@2|Bacteria,2GNCR@201174|Actinobacteria,2363K@1762|Mycobacteriaceae	201174|Actinobacteria	G	Belongs to the FGGY kinase family	xylB	-	2.7.1.17	ko:K00854	ko00040,ko01100,map00040,map01100	M00014	R01639	RC00002,RC00538	ko00000,ko00001,ko00002,ko01000	-	-	-	FGGY_C,FGGY_N
lcl|NC_009525.1_cds_WP_009935961.1_766	419947.MRA_0738	5.53e-147	416.0	COG0188@1|root,COG1670@1|root,COG0188@2|Bacteria,COG1670@2|Bacteria,2GP6T@201174|Actinobacteria,234K8@1762|Mycobacteriaceae	201174|Actinobacteria	L	Type IIA topoisomerase (DNA gyrase topo II, topoisomerase IV), A subunit	-	-	-	-	-	-	-	-	-	-	-	-	Acetyltransf_1,Acetyltransf_3,DNA_topoisoIV
lcl|NC_009525.1_cds_WP_003403728.1_770	419947.MRA_0742	1.61e-182	508.0	COG0024@1|root,COG0024@2|Bacteria,2GKKB@201174|Actinobacteria,232U8@1762|Mycobacteriaceae	201174|Actinobacteria	E	Methionine aminopeptidase	mapA	GO:0000096,GO:0003674,GO:0003824,GO:0004177,GO:0005488,GO:0005506,GO:0005575,GO:0005623,GO:0005886,GO:0006082,GO:0006464,GO:0006508,GO:0006520,GO:0006555,GO:0006790,GO:0006807,GO:0008150,GO:0008152,GO:0008233,GO:0008235,GO:0008237,GO:0008238,GO:0009066,GO:0009987,GO:0010467,GO:0016020,GO:0016151,GO:0016485,GO:0016787,GO:0019538,GO:0019752,GO:0030145,GO:0035551,GO:0036211,GO:0043167,GO:0043169,GO:…	3.4.11.18	ko:K01265	-	-	-	-	ko00000,ko01000,ko01002	-	-	-	Peptidase_M24
lcl|NC_009525.1_cds_WP_003403731.1_771	419947.MRA_0743	1.06e-118	340.0	COG1595@1|root,COG1595@2|Bacteria,2GM3E@201174|Actinobacteria,232BX@1762|Mycobacteriaceae	201174|Actinobacteria	K	Belongs to the sigma-70 factor family. ECF subfamily	sigL	GO:0000988,GO:0000990,GO:0003674,GO:0006355,GO:0008150,GO:0009889,GO:0010468,GO:0010556,GO:0016987,GO:0019219,GO:0019222,GO:0031323,GO:0031326,GO:0043254,GO:0044087,GO:0050789,GO:0050794,GO:0051128,GO:0051171,GO:0051252,GO:0060255,GO:0065007,GO:0080090,GO:0140110,GO:1903506,GO:2000112,GO:2000142,GO:2001141	-	ko:K03088	-	-	-	-	ko00000,ko03021	-	-	-	Sigma70_r2,Sigma70_r4,Sigma70_r4_2
lcl|NC_009525.1_cds_WP_003403741.1_776	419947.MRA_0747	3.27e-129	367.0	COG1576@1|root,COG1576@2|Bacteria,2IGAN@201174|Actinobacteria,233F8@1762|Mycobacteriaceae	201174|Actinobacteria	J	Mycothiol maleylpyruvate isomerase N-terminal domain	-	-	-	-	-	-	-	-	-	-	-	-	MDMPI_N
lcl|NC_009525.1_cds_WP_003898568.1_778	419947.MRA_0748	4.88e-194	538.0	2F1S8@1|root,33USC@2|Bacteria,2IFTF@201174|Actinobacteria,238AH@1762|Mycobacteriaceae	201174|Actinobacteria	-	-	-	-	-	-	-	-	-	-	-	-	-	-	DUF4226
lcl|NC_009525.1_cds_WP_012054160.1_787	419947.MRA_0755	1.39e-85	296.0	COG3391@1|root,COG3391@2|Bacteria	2|Bacteria	CO	amine dehydrogenase activity	-	-	-	-	-	-	-	-	-	-	-	-	HYR,HtaA,NHL,Neocarzinostat,PE
lcl|NC_009525.1_cds_WP_003403850.1_795	83332.Rv0754	0.0	931.0	COG0406@1|root,COG0406@2|Bacteria,2GP71@201174|Actinobacteria,236CX@1762|Mycobacteriaceae	201174|Actinobacteria	G	Phosphoglycerate mutase family	pgmB	GO:0000287,GO:0001666,GO:0003674,GO:0003824,GO:0004619,GO:0005488,GO:0005575,GO:0005618,GO:0005623,GO:0005975,GO:0006082,GO:0006090,GO:0006091,GO:0006096,GO:0006139,GO:0006163,GO:0006164,GO:0006165,GO:0006725,GO:0006732,GO:0006733,GO:0006753,GO:0006754,GO:0006757,GO:0006793,GO:0006796,GO:0006807,GO:0006950,GO:0008150,GO:0008152,GO:0009056,GO:0009058,GO:0009108,GO:0009117,GO:0009123,GO:0009124,GO:…	-	-	-	-	-	-	-	-	-	-	His_Phos_1
lcl|NC_009525.1_cds_WP_003898574.1_796	419947.MRA_0764	1.93e-138	426.0	COG5263@1|root,COG5651@1|root,COG5263@2|Bacteria,COG5651@2|Bacteria	2|Bacteria	N	PPE family	-	GO:0008150,GO:0040007	-	-	-	-	-	-	-	-	-	-	FMN_bind,Glyco_hydro_16,PPE,Pentapeptide_2,SLH
lcl|NC_009525.1_cds_WP_012054162.1_799	419947.MRA_0767	1.9e-176	491.0	COG0745@1|root,COG0745@2|Bacteria,2GIZB@201174|Actinobacteria,232EQ@1762|Mycobacteriaceae	201174|Actinobacteria	KT	response regulator	phoP	-	-	ko:K02483	-	-	-	-	ko00000,ko02022	-	-	-	Response_reg,Trans_reg_C
lcl|NC_009525.1_cds_WP_003916717.1_800	419947.MRA_0768	0.0	915.0	COG5002@1|root,COG5002@2|Bacteria,2I2DU@201174|Actinobacteria,235KY@1762|Mycobacteriaceae	201174|Actinobacteria	T	Histidine kinase	phoR	-	2.7.13.3	ko:K02484	-	-	-	-	ko00000,ko01000,ko01001,ko02022	-	-	-	HAMP,HATPase_c,HisKA
lcl|NC_009525.1_cds_WP_003898577.1_806	419947.MRA_0773	0.0	917.0	COG2124@1|root,COG2124@2|Bacteria,2GK4Z@201174|Actinobacteria,232PI@1762|Mycobacteriaceae	201174|Actinobacteria	Q	cytochrome p450	cyp51	GO:0003674,GO:0003824,GO:0004497,GO:0005488,GO:0005575,GO:0005622,GO:0005623,GO:0005737,GO:0005829,GO:0006629,GO:0008150,GO:0008152,GO:0008202,GO:0008398,GO:0016125,GO:0016491,GO:0016705,GO:0016709,GO:0020037,GO:0032451,GO:0044238,GO:0044424,GO:0044444,GO:0044464,GO:0046906,GO:0048037,GO:0055114,GO:0070988,GO:0071704,GO:0097159,GO:1901360,GO:1901363,GO:1901615	1.14.13.70	ko:K05917	ko00100,ko01100,ko01110,ko01130,map00100,map01100,map01110,map01130	M00101	R05640,R05731	RC01442	ko00000,ko00001,ko00002,ko00199,ko01000	-	-	-	p450
lcl|NC_009525.1_cds_WP_003898578.1_807	419947.MRA_0774	4.16e-194	538.0	COG4221@1|root,COG4221@2|Bacteria,2I8VU@201174|Actinobacteria,2352S@1762|Mycobacteriaceae	201174|Actinobacteria	S	Dehydrogenase	-	-	-	-	-	-	-	-	-	-	-	-	adh_short
lcl|NC_009525.1_cds_WP_003403911.1_808	419947.MRA_0775	7.69e-295	804.0	COG2124@1|root,COG2124@2|Bacteria,2GJ8V@201174|Actinobacteria,233DK@1762|Mycobacteriaceae	201174|Actinobacteria	C	cytochrome p450	cyp123A3	GO:0003674,GO:0003824,GO:0004497,GO:0005575,GO:0005623,GO:0005886,GO:0006066,GO:0006629,GO:0006706,GO:0006707,GO:0008150,GO:0008152,GO:0008202,GO:0008203,GO:0008395,GO:0009056,GO:0016020,GO:0016042,GO:0016125,GO:0016127,GO:0016491,GO:0016705,GO:0016709,GO:0036199,GO:0044238,GO:0044281,GO:0044282,GO:0044464,GO:0046164,GO:0055114,GO:0071704,GO:0071944,GO:1901360,GO:1901361,GO:1901575,GO:1901615,GO:…	-	-	-	-	-	-	-	-	-	-	p450
lcl|NC_009525.1_cds_WP_003898579.1_811	419947.MRA_0778	7.26e-161	452.0	COG1028@1|root,COG1028@2|Bacteria,2HP88@201174|Actinobacteria,23415@1762|Mycobacteriaceae	201174|Actinobacteria	IQ	Dehydrogenase	-	GO:0005575,GO:0005623,GO:0005886,GO:0016020,GO:0044464,GO:0071944	1.1.1.100	ko:K00059	ko00061,ko00333,ko00780,ko01040,ko01100,ko01130,ko01212,map00061,map00333,map00780,map01040,map01100,map01130,map01212	M00083,M00572	R04533,R04534,R04536,R04543,R04566,R04953,R04964,R07759,R07763,R10116,R10120,R11671	RC00029,RC00117	ko00000,ko00001,ko00002,ko01000,ko01004	-	-	-	adh_short_C2
lcl|NC_009525.1_cds_WP_003898580.1_814	419947.MRA_0781	3.43e-299	816.0	COG0151@1|root,COG0151@2|Bacteria,2I2F5@201174|Actinobacteria,2332D@1762|Mycobacteriaceae	201174|Actinobacteria	F	Belongs to the GarS family	purD	GO:0008150,GO:0040007	6.3.3.1,6.3.4.13	ko:K01945,ko:K11788	ko00230,ko01100,ko01110,ko01130,map00230,map01100,map01110,map01130	M00048	R04144,R04208	RC00090,RC00166,RC01100	ko00000,ko00001,ko00002,ko01000	-	-	-	GARS_A,GARS_C,GARS_N
lcl|NC_009525.1_cds_WP_003911281.1_815	419947.MRA_0782	0.0	1039.0	COG0405@1|root,COG0405@2|Bacteria,2GJYW@201174|Actinobacteria,2354G@1762|Mycobacteriaceae	201174|Actinobacteria	E	gamma-glutamyltransferase	ggtA	-	2.3.2.2,3.4.19.13	ko:K00681	ko00430,ko00460,ko00480,ko01100,map00430,map00460,map00480,map01100	-	R00494,R01262,R01687,R03867,R03916,R03970,R03971,R04935	RC00064,RC00090,RC00096	ko00000,ko00001,ko01000,ko01002	-	-	-	G_glu_transpept
lcl|NC_009525.1_cds_WP_003403945.1_817	419947.MRA_0784	1.23e-134	382.0	COG3226@1|root,COG3226@2|Bacteria,2HUE7@201174|Actinobacteria,235NQ@1762|Mycobacteriaceae	201174|Actinobacteria	K	tetR family	-	-	-	-	-	-	-	-	-	-	-	-	TetR_C_6,TetR_N
lcl|NC_009525.1_cds_WP_003403949.1_818	419947.MRA_0785	1.89e-182	508.0	COG4328@1|root,COG4328@2|Bacteria,2I4EQ@201174|Actinobacteria,23507@1762|Mycobacteriaceae	201174|Actinobacteria	S	Protein of unknown function (DUF429)	-	-	-	-	-	-	-	-	-	-	-	-	DUF429
lcl|NC_009525.1_cds_WP_003898583.1_819	419947.MRA_0786	0.0	898.0	COG0015@1|root,COG0015@2|Bacteria,2GKBR@201174|Actinobacteria,234ZQ@1762|Mycobacteriaceae	201174|Actinobacteria	F	Belongs to the lyase 1 family. Adenylosuccinate lyase subfamily	purB	-	4.3.2.2	ko:K01756	ko00230,ko00250,ko01100,ko01110,ko01130,map00230,map00250,map01100,map01110,map01130	M00048,M00049	R01083,R04559	RC00379,RC00444,RC00445	ko00000,ko00001,ko00002,ko01000	-	-	-	ADSL_C,Lyase_1
lcl|NC_009525.1_cds_WP_003898584.1_820	419947.MRA_0787	1.53e-307	837.0	COG2124@1|root,COG2124@2|Bacteria,2GKCG@201174|Actinobacteria,232YJ@1762|Mycobacteriaceae	201174|Actinobacteria	Q	cytochrome p450	cyp126A3	GO:0003674,GO:0003824,GO:0004497,GO:0006066,GO:0006629,GO:0006706,GO:0006707,GO:0008150,GO:0008152,GO:0008202,GO:0008203,GO:0008395,GO:0009056,GO:0016042,GO:0016125,GO:0016127,GO:0016491,GO:0016705,GO:0016709,GO:0036199,GO:0044238,GO:0044281,GO:0044282,GO:0046164,GO:0055114,GO:0071704,GO:1901360,GO:1901361,GO:1901575,GO:1901615,GO:1901616,GO:1902652	-	-	-	-	-	-	-	-	-	-	p450
lcl|NC_009525.1_cds_MRA_RS04130_823	419947.MRA_0790	2.42e-178	495.0	COG1770@1|root,COG1770@2|Bacteria,2GNA9@201174|Actinobacteria,233WC@1762|Mycobacteriaceae	201174|Actinobacteria	E	Oligopeptidase	ptrB	-	3.4.21.83	ko:K01354	ko05142,ko05143,map05142,map05143	-	-	-	ko00000,ko00001,ko01000,ko01002	-	-	-	Peptidase_S9,Peptidase_S9_N
lcl|NC_009525.1_cds_WP_003911278.1_828	419947.MRA_0794	0.0	1145.0	COG3573@1|root,COG3573@2|Bacteria,2GIYM@201174|Actinobacteria,232XQ@1762|Mycobacteriaceae	201174|Actinobacteria	S	Dehydrogenase	-	GO:0003674,GO:0003824,GO:0005575,GO:0005623,GO:0005886,GO:0006629,GO:0006694,GO:0008150,GO:0008152,GO:0008202,GO:0008610,GO:0009058,GO:0016020,GO:0016229,GO:0016491,GO:0016627,GO:0033765,GO:0044238,GO:0044464,GO:0055114,GO:0071704,GO:0071944,GO:1901360,GO:1901362,GO:1901576	-	ko:K07077	-	-	-	-	ko00000	-	-	-	FAD_binding_2
lcl|NC_009525.1_cds_WP_003403989.1_829	419947.MRA_0795	3.87e-154	432.0	COG2220@1|root,COG2220@2|Bacteria,2GNHK@201174|Actinobacteria,232PM@1762|Mycobacteriaceae	201174|Actinobacteria	S	beta-lactamase	-	-	-	-	-	-	-	-	-	-	-	-	Lactamase_B_3
lcl|NC_009525.1_cds_WP_234713123.1_830	419947.MRA_0796	6.53e-187	521.0	28Y2U@1|root,2ZJYE@2|Bacteria,2IAJG@201174|Actinobacteria,238AI@1762|Mycobacteriaceae	201174|Actinobacteria	-	-	-	-	-	-	-	-	-	-	-	-	-	-	-
lcl|NC_009525.1_cds_WP_003403995.1_832	419947.MRA_0798	4e-162	453.0	COG0047@1|root,COG0047@2|Bacteria,2GMJY@201174|Actinobacteria,232RZ@1762|Mycobacteriaceae	201174|Actinobacteria	F	Part of the phosphoribosylformylglycinamidine synthase complex involved in the purines biosynthetic pathway. Catalyzes the ATP-dependent conversion of formylglycinamide ribonucleotide (FGAR) and glutamine to yield formylglycinamidine ribonucleotide (FGAM) and glutamate. The FGAM synthase complex is composed of three subunits. PurQ produces an ammonia molecule by converting glutamine to glutamate.…	purQ	GO:0005575,GO:0005622,GO:0005623,GO:0005737,GO:0005886,GO:0008150,GO:0016020,GO:0040007,GO:0044424,GO:0044464,GO:0071944	6.3.5.3	ko:K01952	ko00230,ko01100,ko01110,ko01130,map00230,map01100,map01110,map01130	M00048	R04463	RC00010,RC01160	ko00000,ko00001,ko00002,ko01000	-	-	-	GATase_5
lcl|NC_009525.1_cds_WP_003404098.1_842	419947.MRA_0809	5.33e-243	667.0	COG2837@1|root,COG2837@2|Bacteria,2GMNJ@201174|Actinobacteria,2339K@1762|Mycobacteriaceae	201174|Actinobacteria	P	Dyp-type peroxidase	-	-	-	ko:K07223	-	-	-	-	ko00000	-	-	-	Dyp_perox
lcl|NC_009525.1_cds_WP_003916725.1_843	419947.MRA_0810	7.72e-313	852.0	COG1362@1|root,COG1362@2|Bacteria,2GKW4@201174|Actinobacteria,233BY@1762|Mycobacteriaceae	201174|Actinobacteria	E	M18 family aminopeptidase 2	apeB	GO:0003674,GO:0003824,GO:0004177,GO:0005575,GO:0005622,GO:0005623,GO:0005737,GO:0005829,GO:0005886,GO:0006508,GO:0006518,GO:0006807,GO:0008150,GO:0008152,GO:0008233,GO:0008235,GO:0008237,GO:0008238,GO:0009987,GO:0016020,GO:0016787,GO:0019538,GO:0034641,GO:0043170,GO:0043603,GO:0044237,GO:0044238,GO:0044424,GO:0044444,GO:0044464,GO:0070006,GO:0070011,GO:0071704,GO:0071944,GO:0140096,GO:1901564	3.4.11.21	ko:K01267	-	-	-	-	ko00000,ko01000,ko01002,ko04131	-	-	-	Peptidase_M18
lcl|NC_009525.1_cds_WP_003404120.1_848	419947.MRA_0815	3.84e-232	638.0	COG1409@1|root,COG1409@2|Bacteria,2HKQQ@201174|Actinobacteria,238B6@1762|Mycobacteriaceae	201174|Actinobacteria	F	Hydrolyzes cAMP to 5'-AMP. Plays an important regulatory role in modulating the intracellular concentration of cAMP, thereby influencing cAMP-dependent processes	cpdA	GO:0003674,GO:0003824,GO:0004112,GO:0004114,GO:0004115,GO:0005488,GO:0005506,GO:0005575,GO:0005618,GO:0005623,GO:0006139,GO:0006163,GO:0006195,GO:0006198,GO:0006725,GO:0006753,GO:0006793,GO:0006796,GO:0006807,GO:0008081,GO:0008150,GO:0008152,GO:0008199,GO:0008663,GO:0009056,GO:0009058,GO:0009117,GO:0009150,GO:0009154,GO:0009166,GO:0009187,GO:0009214,GO:0009259,GO:0009261,GO:0009405,GO:0009987,GO:…	3.1.4.53	ko:K03651	ko00230,ko02025,map00230,map02025	-	R00191	RC00296	ko00000,ko00001,ko01000	-	-	-	Metallophos
lcl|NC_009525.1_cds_WP_003898594.1_849	419947.MRA_0816	0.0	1065.0	COG0438@1|root,COG0438@2|Bacteria,2GJBP@201174|Actinobacteria,232HS@1762|Mycobacteriaceae	201174|Actinobacteria	M	Thought to be involved in exopolysaccharide and or lipopolysaccharide biosynthetic pathway catalytic activity UDP-glucose UDP-galactose	cpsY	GO:0005575,GO:0005618,GO:0005623,GO:0030312,GO:0044464,GO:0071944	5.1.3.2	ko:K01784	ko00052,ko00520,ko01100,map00052,map00520,map01100	M00361,M00362,M00632	R00291,R02984	RC00289	ko00000,ko00001,ko00002,ko01000	-	-	-	Stealth_CR1,Stealth_CR2,Stealth_CR3,Stealth_CR4
lcl|NC_009525.1_cds_WP_003404132.1_852	419947.MRA_0819	1.03e-266	729.0	COG0150@1|root,COG0150@2|Bacteria,2GJNY@201174|Actinobacteria,232WN@1762|Mycobacteriaceae	201174|Actinobacteria	F	Phosphoribosylformylglycinamidine cyclo-ligase	purM	GO:0003674,GO:0003824,GO:0004641,GO:0005575,GO:0005622,GO:0005623,GO:0005737,GO:0005829,GO:0016874,GO:0016879,GO:0016882,GO:0044424,GO:0044444,GO:0044464	6.3.3.1	ko:K01933	ko00230,ko01100,ko01110,ko01130,map00230,map01100,map01110,map01130	M00048	R04208	RC01100	ko00000,ko00001,ko00002,ko01000	-	-	-	AIRS,AIRS_C
lcl|NC_009525.1_cds_WP_003916726.1_855	419947.MRA_0822	2.01e-208	576.0	COG0115@1|root,COG0115@2|Bacteria,2GN5Z@201174|Actinobacteria,2354U@1762|Mycobacteriaceae	201174|Actinobacteria	EH	Branched-chain amino acid aminotransferase 4-amino-4-deoxychorismate lyase	pabC	-	4.1.3.38	ko:K02619	ko00790,map00790	-	R05553	RC01843,RC02148	ko00000,ko00001,ko01000	-	-	-	Aminotran_4
lcl|NC_009525.1_cds_WP_003898596.1_856	419947.MRA_0823	6.76e-146	412.0	COG4044@1|root,COG4044@2|Bacteria,2GKGF@201174|Actinobacteria,232AY@1762|Mycobacteriaceae	201174|Actinobacteria	S	May play a role in the intracellular transport of hydrophobic ligands	-	GO:0005575,GO:0005623,GO:0005886,GO:0016020,GO:0044464,GO:0071944	-	-	-	-	-	-	-	-	-	-	DUF1794
lcl|NC_009525.1_cds_WP_003898598.1_859	419947.MRA_0826	3.16e-93	272.0	COG0526@1|root,COG0526@2|Bacteria,2IKMI@201174|Actinobacteria,239K2@1762|Mycobacteriaceae	201174|Actinobacteria	CO	Thioredoxin	thiX	-	-	-	-	-	-	-	-	-	-	-	Thioredoxin
lcl|NC_009525.1_cds_WP_003898599.1_861	419947.MRA_0828	6.08e-177	493.0	COG0745@1|root,COG0745@2|Bacteria,2GJGU@201174|Actinobacteria,233GE@1762|Mycobacteriaceae	201174|Actinobacteria	KT	transcriptional	glnR	-	-	-	-	-	-	-	-	-	-	-	Trans_reg_C
lcl|NC_009525.1_cds_WP_003898600.1_865	419947.MRA_0832	0.0	1337.0	COG1316@1|root,COG1316@2|Bacteria,2GJM3@201174|Actinobacteria,2353X@1762|Mycobacteriaceae	201174|Actinobacteria	K	cell envelope-related transcriptional attenuator	-	-	-	-	-	-	-	-	-	-	-	-	LytR_C,LytR_cpsA_psr
lcl|NC_009525.1_cds_WP_003898601.1_866	419947.MRA_0833	7.84e-286	780.0	COG0042@1|root,COG0042@2|Bacteria,2GJ8I@201174|Actinobacteria,232V6@1762|Mycobacteriaceae	201174|Actinobacteria	J	Catalyzes the synthesis of 5,6-dihydrouridine (D), a modified base found in the D-loop of most tRNAs, via the reduction of the C5-C6 double bond in target uridines	dus	GO:0008150,GO:0010565,GO:0019216,GO:0019217,GO:0019222,GO:0031323,GO:0050789,GO:0050794,GO:0062012,GO:0065007,GO:0080090	-	-	-	-	-	-	-	-	-	-	Dus
lcl|NC_009525.1_cds_WP_003404326.1_868	419947.MRA_0835	3.86e-150	422.0	COG1309@1|root,COG1309@2|Bacteria,2GK5Q@201174|Actinobacteria,233W2@1762|Mycobacteriaceae	201174|Actinobacteria	K	Transcriptional regulator	-	-	-	-	-	-	-	-	-	-	-	-	TetR_N
lcl|NC_009525.1_cds_WP_078377808.1_871	419947.MRA_0838	3.76e-83	246.0	COG0590@1|root,COG0590@2|Bacteria,2INAI@201174|Actinobacteria,235Q6@1762|Mycobacteriaceae	201174|Actinobacteria	FJ	MafB19-like deaminase	guaD	-	3.5.4.3	ko:K01487	ko00230,ko01100,map00230,map01100	-	R01676	RC00204	ko00000,ko00001,ko01000	-	-	-	MafB19-deam,dCMP_cyt_deam_1
lcl|NC_009525.1_cds_WP_003404352.1_874	419947.MRA_0840	1.84e-195	541.0	2EE42@1|root,337YQ@2|Bacteria,2IA9N@201174|Actinobacteria,235XM@1762|Mycobacteriaceae	201174|Actinobacteria	-	-	-	-	-	-	-	-	-	-	-	-	-	-	-
lcl|NC_009525.1_cds_WP_010886090.1_877	419947.MRA_0842	5.36e-91	315.0	COG3391@1|root,COG3391@2|Bacteria,2I502@201174|Actinobacteria,23F8P@1762|Mycobacteriaceae	201174|Actinobacteria	S	PE family	-	-	-	-	-	-	-	-	-	-	-	-	PE
lcl|NC_009525.1_cds_WP_003900221.1_880	419947.MRA_0844	1.42e-162	455.0	COG4849@1|root,COG4849@2|Bacteria,2ITD9@201174|Actinobacteria	201174|Actinobacteria	S	Protein conserved in bacteria	-	-	-	-	-	-	-	-	-	-	-	-	AbiEii
lcl|NC_009525.1_cds_WP_003404373.1_883	419947.MRA_0847	1.11e-200	555.0	COG0500@1|root,COG2226@2|Bacteria,2GK7A@201174|Actinobacteria,237ZQ@1762|Mycobacteriaceae	201174|Actinobacteria	Q	Methionine biosynthesis protein MetW	-	-	-	-	-	-	-	-	-	-	-	-	Methyltransf_11,Methyltransf_31
lcl|NC_009525.1_cds_WP_042507733.1_888	419947.MRA_0853	3.59e-277	760.0	COG4585@1|root,COG4585@2|Bacteria,2IAG1@201174|Actinobacteria,2348E@1762|Mycobacteriaceae	201174|Actinobacteria	T	Histidine kinase	-	-	2.7.13.3	ko:K02480	-	-	-	-	ko00000,ko01000,ko01001,ko02022	-	-	-	HATPase_c
lcl|NC_009525.1_cds_WP_003404392.1_889	419947.MRA_0854	0.0	1030.0	COG2132@1|root,COG2132@2|Bacteria,2GMJ4@201174|Actinobacteria,2358K@1762|Mycobacteriaceae	201174|Actinobacteria	Q	PFAM multicopper oxidase	mco	GO:0005575,GO:0005623,GO:0030288,GO:0030313,GO:0031975,GO:0042597,GO:0044464	-	-	-	-	-	-	-	-	-	-	Cu-oxidase,Cu-oxidase_2,Cu-oxidase_3
lcl|NC_009525.1_cds_WP_003901025.1_890	419947.MRA_0855	7.39e-85	250.0	2BG8G@1|root,32A5H@2|Bacteria,2IR6Q@201174|Actinobacteria,23AJQ@1762|Mycobacteriaceae	201174|Actinobacteria	-	-	lpqS	GO:0008150,GO:0010035,GO:0010038,GO:0042221,GO:0046688,GO:0050896	-	ko:K21608	-	-	-	-	ko00000	-	-	-	-
lcl|NC_009525.1_cds_WP_009935595.1_891	419947.MRA_0856	1.28e-280	765.0	COG0031@1|root,COG0031@2|Bacteria,2GK6J@201174|Actinobacteria,236CT@1762|Mycobacteriaceae	201174|Actinobacteria	E	PFAM Pyridoxal-5'-phosphate-dependent enzyme, beta subunit	cysK2	GO:0000096,GO:0000097,GO:0003674,GO:0003824,GO:0004124,GO:0005488,GO:0005515,GO:0005575,GO:0005618,GO:0005622,GO:0005623,GO:0005737,GO:0005829,GO:0006082,GO:0006520,GO:0006534,GO:0006535,GO:0006563,GO:0006790,GO:0006807,GO:0008144,GO:0008150,GO:0008152,GO:0008652,GO:0009058,GO:0009069,GO:0009070,GO:0009987,GO:0016053,GO:0016740,GO:0016765,GO:0016829,GO:0016846,GO:0019344,GO:0019752,GO:0019842,GO:…	2.5.1.47	ko:K01738	ko00270,ko00920,ko01100,ko01110,ko01120,ko01130,ko01200,ko01230,map00270,map00920,map01100,map01110,map01120,map01130,map01200,map01230	M00021	R00897,R03601,R04859	RC00020,RC02814,RC02821	ko00000,ko00001,ko00002,ko01000	-	-	-	PALP
lcl|NC_009525.1_cds_WP_003898616.1_894	419947.MRA_0859	3.71e-197	546.0	COG1028@1|root,COG1028@2|Bacteria,2I4ES@201174|Actinobacteria,2361T@1762|Mycobacteriaceae	201174|Actinobacteria	IQ	Belongs to the short-chain dehydrogenases reductases (SDR) family	-	GO:0003674,GO:0003824,GO:0004303,GO:0005488,GO:0005515,GO:0005575,GO:0005622,GO:0005623,GO:0005737,GO:0005777,GO:0006066,GO:0006629,GO:0007568,GO:0008150,GO:0008152,GO:0008202,GO:0008203,GO:0009719,GO:0009725,GO:0009987,GO:0010033,GO:0014070,GO:0016125,GO:0016229,GO:0016491,GO:0016614,GO:0016616,GO:0016829,GO:0016835,GO:0016836,GO:0018812,GO:0030283,GO:0032502,GO:0033764,GO:0033993,GO:0042221,GO:…	-	-	-	-	-	-	-	-	-	-	adh_short
lcl|NC_009525.1_cds_WP_003913008.1_895	419947.MRA_0860	1.9e-149	423.0	2EYIS@1|root,33RSI@2|Bacteria,2IBP6@201174|Actinobacteria,235R9@1762|Mycobacteriaceae	201174|Actinobacteria	-	-	fadD16	-	-	-	-	-	-	-	-	-	-	-	-
lcl|NC_009525.1_cds_WP_003900222.1_896	419947.MRA_0861	0.0	1071.0	COG3961@1|root,COG3961@2|Bacteria,2GWS8@201174|Actinobacteria,2345F@1762|Mycobacteriaceae	201174|Actinobacteria	GH	Belongs to the TPP enzyme family	pdc	GO:0003674,GO:0003824,GO:0005575,GO:0005622,GO:0005623,GO:0005886,GO:0016020,GO:0016829,GO:0016830,GO:0016831,GO:0044464,GO:0071944	4.1.1.74	ko:K04103,ko:K21431	ko00380,ko01100,map00380,map01100	-	R01974	RC00506	ko00000,ko00001,ko01000	-	-	-	TPP_enzyme_C,TPP_enzyme_M,TPP_enzyme_N
lcl|NC_009525.1_cds_WP_003404414.1_898	419947.MRA_0863	9.13e-263	719.0	COG1804@1|root,COG1804@2|Bacteria,2GKNX@201174|Actinobacteria,234U5@1762|Mycobacteriaceae	201174|Actinobacteria	C	carnitine dehydratase	far	-	5.1.99.4	ko:K01796	ko00120,ko01100,ko04146,map00120,map01100,map04146	M00104	R08734,R08739	RC02345	ko00000,ko00001,ko00002,ko01000	-	-	iNJ661.Rv0855	CoA_transf_3
lcl|NC_009525.1_cds_WP_009934956.1_902	419947.MRA_0867	1.21e-287	786.0	COG0183@1|root,COG0183@2|Bacteria,2GJAC@201174|Actinobacteria,234JV@1762|Mycobacteriaceae	201174|Actinobacteria	I	Catalyzes the synthesis of acetoacetyl coenzyme A from two molecules of acetyl coenzyme A. It can also act as a thiolase, catalyzing the reverse reaction and generating two-carbon units from the four-carbon product of fatty acid oxidation	fadA	GO:0003674,GO:0003824,GO:0003988,GO:0005575,GO:0005618,GO:0005623,GO:0005886,GO:0006082,GO:0006629,GO:0006631,GO:0006635,GO:0008150,GO:0008152,GO:0009056,GO:0009062,GO:0009987,GO:0016020,GO:0016042,GO:0016054,GO:0016408,GO:0016740,GO:0016746,GO:0016747,GO:0019395,GO:0019752,GO:0030258,GO:0030312,GO:0032787,GO:0034440,GO:0043436,GO:0044237,GO:0044238,GO:0044242,GO:0044248,GO:0044255,GO:0044281,GO:…	2.3.1.9	ko:K00626	ko00071,ko00072,ko00280,ko00310,ko00362,ko00380,ko00620,ko00630,ko00640,ko00650,ko00720,ko00900,ko01100,ko01110,ko01120,ko01130,ko01200,ko01212,ko02020,map00071,map00072,map00280,map00310,map00362,map00380,map00620,map00630,map00640,map00650,map00720,map00900,map01100,map01110,map01120,map01130,map01200,map01212,map02020	M00088,M00095,M00373,M00374,M00375	R00238,R01177	RC00004,RC00326	ko00000,ko00001,ko00002,ko01000,ko04147	-	-	-	Thiolase_C,Thiolase_N
lcl|NC_009525.1_cds_WP_003404426.1_903	419947.MRA_0868	0.0	1392.0	COG1024@1|root,COG1250@1|root,COG1024@2|Bacteria,COG1250@2|Bacteria,2GJ50@201174|Actinobacteria,233C6@1762|Mycobacteriaceae	201174|Actinobacteria	I	3-hydroxyacyl-CoA dehydrogenase	fadB	-	1.1.1.35,4.2.1.17,5.1.2.3	ko:K01782	ko00071,ko00280,ko00281,ko00310,ko00362,ko00380,ko00410,ko00640,ko00650,ko00903,ko00930,ko01040,ko01100,ko01110,ko01120,ko01130,ko01200,ko01212,map00071,map00280,map00281,map00310,map00362,map00380,map00410,map00640,map00650,map00903,map00930,map01040,map01100,map01110,map01120,map01130,map01200,map01212	M00032,M00087	R01975,R03026,R03045,R03276,R04137,R04170,R04203,R04204,R04224,R04737,R04738,R04739,R04740,R04741,R04744,R04745,R04746,R04748,R04749,R05066,R05305,R06411,R06412,R06941,R06942,R07935,R07951,R08093,R08094	RC00029,RC00099,RC00117,RC00241,RC00525,RC00831,RC00834,RC00896,RC01086,RC01095,RC01098,RC01103,RC01217,RC02115	ko00000,ko00001,ko00002,ko01000	-	-	-	3HCDH,3HCDH_N,ECH_1
lcl|NC_009525.1_cds_WP_003913615.1_904	419947.MRA_0869	0.0	1063.0	COG1061@1|root,COG1061@2|Bacteria,2GIR9@201174|Actinobacteria,2343U@1762|Mycobacteriaceae	201174|Actinobacteria	L	Type III restriction enzyme res subunit	ercc3	-	3.6.4.12	ko:K10843	ko03022,ko03420,map03022,map03420	M00290	-	-	ko00000,ko00001,ko00002,ko01000,ko03021,ko03400	-	-	-	ERCC3_RAD25_C,Helicase_C_3,ResIII
lcl|NC_009525.1_cds_WP_003898622.1_905	419947.MRA_0870	0.0	1431.0	COG2378@1|root,COG2378@2|Bacteria,2GURQ@201174|Actinobacteria,235V8@1762|Mycobacteriaceae	201174|Actinobacteria	K	Helicase conserved C-terminal domain	-	-	-	-	-	-	-	-	-	-	-	-	Helicase_C_3
lcl|NC_009525.1_cds_WP_003404559.1_911	419947.MRA_0875	7e-54	169.0	COG1977@1|root,COG1977@2|Bacteria,2IQIT@201174|Actinobacteria,23B79@1762|Mycobacteriaceae	201174|Actinobacteria	H	Molybdopterin converting factor, small subunit	moaD2	-	-	ko:K03636	ko04122,map04122	-	-	-	ko00000,ko00001	-	-	-	ThiS
lcl|NC_009525.1_cds_WP_003404564.1_912	419947.MRA_0876	4.19e-264	723.0	COG2896@1|root,COG2896@2|Bacteria,2GN0V@201174|Actinobacteria,232UP@1762|Mycobacteriaceae	201174|Actinobacteria	H	Catalyzes the cyclization of GTP to (8S)-3',8-cyclo-7,8- dihydroguanosine 5'-triphosphate	moaA	GO:0005575,GO:0005618,GO:0005623,GO:0030312,GO:0044464,GO:0071944	4.1.99.22	ko:K03639	ko00790,ko01100,ko04122,map00790,map01100,map04122	-	R09394	RC03420	ko00000,ko00001,ko01000	-	-	-	Fer4_12,Mob_synth_C,Radical_SAM
lcl|NC_009525.1_cds_WP_010886091.1_915	419947.MRA_0879	3.14e-94	308.0	COG0657@1|root,COG0657@2|Bacteria,2I503@201174|Actinobacteria,23F8Q@1762|Mycobacteriaceae	201174|Actinobacteria	I	PE family	-	-	-	-	-	-	-	-	-	-	-	-	PE
lcl|NC_009525.1_cds_WP_003898626.1_916	419947.MRA_0880	0.0	1263.0	COG1960@1|root,COG1960@2|Bacteria,2GKK9@201174|Actinobacteria,234UB@1762|Mycobacteriaceae	201174|Actinobacteria	I	acyl-CoA dehydrogenase	fadE10	GO:0005575,GO:0005618,GO:0005622,GO:0005623,GO:0005737,GO:0005829,GO:0005886,GO:0016020,GO:0030312,GO:0044424,GO:0044444,GO:0044464,GO:0071944	-	-	-	-	-	-	-	-	-	-	Acyl-CoA_dh_1,Acyl-CoA_dh_M,Acyl-CoA_dh_N,DUF1974
lcl|NC_009525.1_cds_WP_003900225.1_919	419947.MRA_0883	0.0	967.0	COG0477@1|root,COG2814@2|Bacteria,2GKRT@201174|Actinobacteria,232X4@1762|Mycobacteriaceae	201174|Actinobacteria	EGP	Major facilitator superfamily	-	GO:0005575,GO:0005576,GO:0005623,GO:0005886,GO:0016020,GO:0044464,GO:0071944	-	-	-	-	-	-	-	-	-	-	MFS_1
lcl|NC_009525.1_cds_WP_003916735.1_924	419947.MRA_0888	3.44e-204	565.0	COG0566@1|root,COG0566@2|Bacteria,2GJ12@201174|Actinobacteria,233P1@1762|Mycobacteriaceae	201174|Actinobacteria	J	rRNA methyltransferase	spoU2	-	-	-	-	-	-	-	-	-	-	-	SpoU_methylase
lcl|NC_009525.1_cds_WP_003404631.1_929	419947.MRA_0893	0.0	1097.0	COG0493@1|root,COG0493@2|Bacteria,2GJ4A@201174|Actinobacteria,2355D@1762|Mycobacteriaceae	201174|Actinobacteria	C	ferredoxin	fprB	GO:0003674,GO:0003824,GO:0005575,GO:0005622,GO:0005623,GO:0005737,GO:0005886,GO:0008150,GO:0008152,GO:0016020,GO:0016491,GO:0044424,GO:0044464,GO:0055114,GO:0071944	1.18.1.2,1.19.1.1	ko:K00528	-	-	R10159	-	ko00000,ko01000	-	-	-	Fer4,Pyr_redox_2
lcl|NC_009525.1_cds_WP_003901038.1_931	419947.MRA_0896	0.0	983.0	COG3021@1|root,COG3021@2|Bacteria,2I504@201174|Actinobacteria,237D6@1762|Mycobacteriaceae	201174|Actinobacteria	S	Endonuclease/Exonuclease/phosphatase family	-	GO:0001906,GO:0003674,GO:0003824,GO:0004620,GO:0004767,GO:0005215,GO:0005575,GO:0005623,GO:0006629,GO:0006643,GO:0006644,GO:0006665,GO:0006684,GO:0006685,GO:0006793,GO:0006796,GO:0006807,GO:0006810,GO:0008081,GO:0008150,GO:0008152,GO:0009056,GO:0009279,GO:0009395,GO:0009987,GO:0010033,GO:0016020,GO:0016042,GO:0016298,GO:0016787,GO:0016788,GO:0019637,GO:0019835,GO:0019867,GO:0030149,GO:0030312,GO:…	-	-	-	-	-	-	-	-	-	-	Exo_endo_phos
lcl|NC_009525.1_cds_WP_003404651.1_934	419947.MRA_0900	0.0	992.0	COG2072@1|root,COG2072@2|Bacteria,2GJEA@201174|Actinobacteria,23361@1762|Mycobacteriaceae	201174|Actinobacteria	P	flavoprotein involved in K transport	-	GO:0005575,GO:0005618,GO:0005623,GO:0030312,GO:0044464,GO:0071944	-	-	-	-	-	-	-	-	-	-	FMO-like,K_oxygenase,Pyr_redox_3
lcl|NC_009525.1_cds_WP_003404660.1_936	419947.MRA_0902	6.94e-282	770.0	COG3903@1|root,COG3903@2|Bacteria,2GIZ1@201174|Actinobacteria,233DM@1762|Mycobacteriaceae	201174|Actinobacteria	K	involved in signal transduction (via phosphorylation) involved in transcriptional regulatory mechanism and in the regulation of secondary metabolites catalytic activity ATP a protein ADP a phosphoprotein	-	GO:0005575,GO:0005622,GO:0005623,GO:0005737,GO:0005829,GO:0008150,GO:0040007,GO:0044424,GO:0044444,GO:0044464	-	-	-	-	-	-	-	-	-	-	GerE,Guanylate_cyc,NB-ARC
lcl|NC_009525.1_cds_WP_003901040.1_938	419947.MRA_0904	0.0	870.0	COG0372@1|root,COG0372@2|Bacteria,2GJ7E@201174|Actinobacteria,2350N@1762|Mycobacteriaceae	201174|Actinobacteria	C	Belongs to the citrate synthase family	gltA	GO:0005575,GO:0005622,GO:0005623,GO:0005737,GO:0005829,GO:0005886,GO:0016020,GO:0044424,GO:0044444,GO:0044464,GO:0071944	2.3.3.1	ko:K01647	ko00020,ko00630,ko01100,ko01110,ko01120,ko01130,ko01200,ko01210,ko01230,map00020,map00630,map01100,map01110,map01120,map01130,map01200,map01210,map01230	M00009,M00010,M00012,M00740	R00351	RC00004,RC00067	br01601,ko00000,ko00001,ko00002,ko01000	-	-	-	Citrate_synt
lcl|NC_009525.1_cds_WP_003900230.1_939	419947.MRA_0905	0.0	1051.0	COG1233@1|root,COG1233@2|Bacteria,2GMUC@201174|Actinobacteria,2335H@1762|Mycobacteriaceae	201174|Actinobacteria	Q	NAD(P)-binding Rossmann-like domain	-	GO:0005575,GO:0005622,GO:0005623,GO:0005737,GO:0005829,GO:0044424,GO:0044444,GO:0044464	-	-	-	-	-	-	-	-	-	-	Amino_oxidase,DAO,NAD_binding_8
lcl|NC_009525.1_cds_WP_003404684.1_941	419947.MRA_0906	8.36e-231	635.0	COG2885@1|root,COG2885@2|Bacteria,2HXT6@201174|Actinobacteria,237JV@1762|Mycobacteriaceae	201174|Actinobacteria	M	Belongs to the ompA family	ompA	GO:0003674,GO:0005215,GO:0005488,GO:0005539,GO:0005575,GO:0005618,GO:0005622,GO:0005623,GO:0005737,GO:0005829,GO:0005886,GO:0005887,GO:0006810,GO:0006811,GO:0006812,GO:0008150,GO:0009268,GO:0009279,GO:0009628,GO:0010447,GO:0015267,GO:0015288,GO:0015696,GO:0016020,GO:0016021,GO:0019867,GO:0022803,GO:0022829,GO:0022857,GO:0030312,GO:0030313,GO:0031224,GO:0031226,GO:0031975,GO:0034220,GO:0040007,GO:…	-	ko:K16191	-	-	-	-	ko00000,ko02000	1.B.6.1.3	-	-	BON,OmpA
lcl|NC_009525.1_cds_WP_003404689.1_944	419947.MRA_0909	1.96e-308	842.0	COG0642@1|root,COG2205@2|Bacteria,2H2N3@201174|Actinobacteria,2329F@1762|Mycobacteriaceae	201174|Actinobacteria	T	Histidine kinase	prrB	GO:0000166,GO:0003674,GO:0003824,GO:0004672,GO:0005488,GO:0005515,GO:0005524,GO:0005575,GO:0005618,GO:0005623,GO:0005886,GO:0005887,GO:0006464,GO:0006468,GO:0006793,GO:0006796,GO:0006807,GO:0008144,GO:0008150,GO:0008152,GO:0009987,GO:0016020,GO:0016021,GO:0016301,GO:0016310,GO:0016740,GO:0016772,GO:0016773,GO:0017076,GO:0019538,GO:0030312,GO:0030554,GO:0031224,GO:0031226,GO:0032553,GO:0032555,GO:…	2.7.13.3	ko:K07655	ko02020,map02020	M00462	-	-	ko00000,ko00001,ko00002,ko01000,ko01001,ko02022	-	-	-	HAMP,HATPase_c,HisKA
lcl|NC_009525.1_cds_WP_003404690.1_945	419947.MRA_0910	5.83e-161	451.0	COG0745@1|root,COG0745@2|Bacteria,2GNFH@201174|Actinobacteria,232GG@1762|Mycobacteriaceae	201174|Actinobacteria	K	transcriptional	prrA	GO:0000287,GO:0003674,GO:0005488,GO:0005509,GO:0005575,GO:0005622,GO:0005623,GO:0005737,GO:0005829,GO:0005886,GO:0008150,GO:0016020,GO:0040007,GO:0043167,GO:0043169,GO:0044110,GO:0044403,GO:0044419,GO:0044424,GO:0044444,GO:0044464,GO:0046872,GO:0051704,GO:0071944	-	ko:K07671	ko02020,map02020	M00462	-	-	ko00000,ko00001,ko00002,ko02022	-	-	-	Response_reg,Trans_reg_C
lcl|NC_009525.1_cds_WP_003404691.1_946	419947.MRA_0911	0.0	942.0	COG0777@1|root,COG0825@1|root,COG0777@2|Bacteria,COG0825@2|Bacteria,2GNP7@201174|Actinobacteria,23491@1762|Mycobacteriaceae	201174|Actinobacteria	I	carboxyl transferase	accD3	GO:0005575,GO:0005623,GO:0005886,GO:0006082,GO:0006629,GO:0006631,GO:0006633,GO:0008150,GO:0008152,GO:0008610,GO:0009058,GO:0009059,GO:0009273,GO:0009987,GO:0016020,GO:0016053,GO:0019752,GO:0032787,GO:0034645,GO:0042546,GO:0043170,GO:0043436,GO:0044036,GO:0044038,GO:0044085,GO:0044237,GO:0044238,GO:0044249,GO:0044255,GO:0044260,GO:0044281,GO:0044283,GO:0044464,GO:0046394,GO:0070589,GO:0071554,GO:…	2.1.3.15,6.4.1.2	ko:K01962,ko:K01963	ko00061,ko00620,ko00640,ko00720,ko01100,ko01110,ko01120,ko01130,ko01200,ko01212,map00061,map00620,map00640,map00720,map01100,map01110,map01120,map01130,map01200,map01212	M00082,M00376	R00742,R04386	RC00040,RC00253,RC00367	ko00000,ko00001,ko00002,ko01000	-	-	-	Carboxyl_trans
lcl|NC_009525.1_cds_WP_003404705.1_948	419947.MRA_0913	2.59e-280	764.0	COG2220@1|root,COG2220@2|Bacteria,2GNXJ@201174|Actinobacteria,232B8@1762|Mycobacteriaceae	201174|Actinobacteria	S	Beta-lactamase superfamily domain	-	-	-	-	-	-	-	-	-	-	-	-	Lactamase_B_2
lcl|NC_009525.1_cds_WP_003898639.1_950	419947.MRA_0915	0.0	1484.0	COG0474@1|root,COG0474@2|Bacteria,2GJJC@201174|Actinobacteria,2361Q@1762|Mycobacteriaceae	201174|Actinobacteria	P	ATPase, P-type (transporting), HAD superfamily, subfamily IC	ctpE	GO:0003674,GO:0003824,GO:0005215,GO:0005388,GO:0005575,GO:0005622,GO:0005623,GO:0005886,GO:0005887,GO:0006810,GO:0006811,GO:0006812,GO:0006816,GO:0008150,GO:0008324,GO:0015075,GO:0015085,GO:0015318,GO:0015399,GO:0015405,GO:0015662,GO:0016020,GO:0016021,GO:0016462,GO:0016787,GO:0016817,GO:0016818,GO:0016887,GO:0017111,GO:0019829,GO:0022804,GO:0022853,GO:0022857,GO:0022890,GO:0030001,GO:0031224,GO:…	-	ko:K12952	-	-	-	-	ko00000,ko01000	3.A.3.23	-	-	E1-E2_ATPase,Hydrolase
lcl|NC_009525.1_cds_WP_003898641.1_952	419947.MRA_0916	1.36e-34	118.0	2EJAX@1|root,33D21@2|Bacteria,2GRA9@201174|Actinobacteria,23BF2@1762|Mycobacteriaceae	201174|Actinobacteria	S	MT0933-like antitoxin protein	-	GO:0008150,GO:0040008,GO:0045927,GO:0048518,GO:0050789,GO:0065007	-	-	-	-	-	-	-	-	-	-	MT0933_antitox
lcl|NC_009525.1_cds_WP_003404735.1_954	419947.MRA_0918	1.78e-195	540.0	COG3324@1|root,COG3324@2|Bacteria,2GJFC@201174|Actinobacteria,232IB@1762|Mycobacteriaceae	201174|Actinobacteria	S	Glyoxalase bleomycin resistance protein dioxygenase	-	-	-	ko:K06996	-	-	-	-	ko00000	-	-	-	Glyoxalase
lcl|NC_009525.1_cds_WP_003404738.1_955	419947.MRA_0919	9.93e-99	287.0	2AKTG@1|root,31BKH@2|Bacteria,2II8C@201174|Actinobacteria,2399E@1762|Mycobacteriaceae	201174|Actinobacteria	-	-	-	-	-	-	-	-	-	-	-	-	-	-	-
lcl|NC_009525.1_cds_WP_003898642.1_956	1041522.MCOL_V225407	3.41e-26	100.0	COG0346@1|root,COG0346@2|Bacteria,2IFCA@201174|Actinobacteria,238ZP@1762|Mycobacteriaceae	201174|Actinobacteria	E	lactoylglutathione lyase activity	-	-	-	-	-	-	-	-	-	-	-	-	Glyoxalase
lcl|NC_009525.1_cds_WP_003898647.1_963	419947.MRA_0926	1.14e-106	308.0	COG4453@1|root,COG4453@2|Bacteria,2IPNF@201174|Actinobacteria,239ZX@1762|Mycobacteriaceae	201174|Actinobacteria	S	Protein of unknown function (DUF1778)	-	-	-	-	-	-	-	-	-	-	-	-	DUF1778
lcl|NC_009525.1_cds_WP_003898648.1_968	419947.MRA_0931	3.32e-267	730.0	COG2105@1|root,COG4195@1|root,COG2105@2|Bacteria,COG4195@2|Bacteria,2GU51@201174|Actinobacteria,235BA@1762|Mycobacteriaceae	201174|Actinobacteria	C	Replication protein	-	-	-	-	-	-	-	-	-	-	-	-	AIG2_2,GGACT,Gamma_PGA_hydro
lcl|NC_009525.1_cds_WP_003898649.1_969	419947.MRA_0932	2.79e-292	800.0	COG1914@1|root,COG1914@2|Bacteria,2GJSM@201174|Actinobacteria,234PN@1762|Mycobacteriaceae	201174|Actinobacteria	P	H( )-stimulated, divalent metal cation uptake system	mntH	GO:0000041,GO:0006810,GO:0006811,GO:0006812,GO:0006826,GO:0006828,GO:0006829,GO:0008150,GO:0030001,GO:0034220,GO:0034755,GO:0051179,GO:0051234,GO:0055085,GO:0070838,GO:0071421,GO:0071577,GO:0071578,GO:0072511,GO:0098655,GO:0098657,GO:0098659,GO:0098660,GO:0098662,GO:0098739,GO:0099587	-	ko:K03322	-	-	-	-	ko00000,ko02000	2.A.55.2.6,2.A.55.3	-	-	Nramp
lcl|NC_009525.1_cds_WP_003404764.1_970	419947.MRA_0933	2.07e-188	521.0	COG0655@1|root,COG0655@2|Bacteria,2GKTM@201174|Actinobacteria,233W4@1762|Mycobacteriaceae	201174|Actinobacteria	S	NADPH-dependent FMN reductase	-	-	-	-	-	-	-	-	-	-	-	-	FMN_red
lcl|NC_009525.1_cds_WP_003404775.1_973	419947.MRA_0936	1.3e-263	722.0	COG0226@1|root,COG0226@2|Bacteria,2GJXD@201174|Actinobacteria,233MY@1762|Mycobacteriaceae	201174|Actinobacteria	P	Part of the ABC transporter complex PstSACB involved in phosphate import	pstS	GO:0002682,GO:0002683,GO:0005575,GO:0005576,GO:0005618,GO:0005623,GO:0005886,GO:0006950,GO:0007154,GO:0008150,GO:0009267,GO:0009605,GO:0009607,GO:0009987,GO:0009991,GO:0016020,GO:0016036,GO:0030312,GO:0031347,GO:0031348,GO:0031667,GO:0031668,GO:0031669,GO:0033554,GO:0035821,GO:0040007,GO:0042594,GO:0043207,GO:0044003,GO:0044110,GO:0044116,GO:0044117,GO:0044403,GO:0044413,GO:0044414,GO:0044419,GO:…	-	ko:K02040	ko02010,ko02020,ko05152,map02010,map02020,map05152	M00222	-	-	ko00000,ko00001,ko00002,ko02000	3.A.1.7	-	-	PBP_like_2
lcl|NC_009525.1_cds_WP_003915879.1_975	419947.MRA_0938	1.97e-202	562.0	COG0581@1|root,COG0581@2|Bacteria,2I2F2@201174|Actinobacteria,233S3@1762|Mycobacteriaceae	201174|Actinobacteria	P	Phosphate transport system permease	pstA	GO:0008150,GO:0040007,GO:0044110,GO:0044116,GO:0044117,GO:0044403,GO:0044419,GO:0051704	-	ko:K02038	ko02010,map02010	M00222	-	-	ko00000,ko00001,ko00002,ko02000	3.A.1.7	-	-	BPD_transp_1
lcl|NC_009525.1_cds_WP_003898652.1_977	419947.MRA_0940	3.2e-264	724.0	COG0226@1|root,COG0226@2|Bacteria,2GJXD@201174|Actinobacteria,234G6@1762|Mycobacteriaceae	201174|Actinobacteria	P	Part of the ABC transporter complex PstSACB involved in phosphate import	pstS	GO:0005575,GO:0005576,GO:0005623,GO:0005886,GO:0006810,GO:0006811,GO:0006817,GO:0006820,GO:0008150,GO:0015698,GO:0016020,GO:0044464,GO:0051179,GO:0051234,GO:0071944	-	ko:K02040	ko02010,ko02020,ko05152,map02010,map02020,map05152	M00222	-	-	ko00000,ko00001,ko00002,ko02000	3.A.1.7	-	-	PBP_like_2
lcl|NC_009525.1_cds_WP_003898653.1_978	419947.MRA_0941	2.23e-194	539.0	COG1117@1|root,COG1117@2|Bacteria,2H3XA@201174|Actinobacteria,23D22@1762|Mycobacteriaceae	201174|Actinobacteria	P	Part of the ABC transporter complex PstSACB involved in phosphate import. Responsible for energy coupling to the transport system	pstB	GO:0000166,GO:0003674,GO:0003824,GO:0005488,GO:0005524,GO:0005575,GO:0005623,GO:0005886,GO:0008144,GO:0016020,GO:0016462,GO:0016787,GO:0016817,GO:0016818,GO:0016887,GO:0017076,GO:0017111,GO:0030554,GO:0032553,GO:0032555,GO:0032559,GO:0035639,GO:0036094,GO:0043167,GO:0043168,GO:0044464,GO:0071944,GO:0097159,GO:0097367,GO:1901265,GO:1901363	3.6.3.27	ko:K02036	ko02010,map02010	M00222	-	-	ko00000,ko00001,ko00002,ko01000,ko02000	3.A.1.7	-	-	ABC_tran
lcl|NC_009525.1_cds_WP_003900236.1_979	419947.MRA_0942	1.7e-261	717.0	COG0226@1|root,COG0226@2|Bacteria,2IDU5@201174|Actinobacteria,23CM7@1762|Mycobacteriaceae	201174|Actinobacteria	P	Part of the ABC transporter complex PstSACB involved in phosphate import	pstS1	GO:0003674,GO:0005488,GO:0005575,GO:0005576,GO:0005618,GO:0005622,GO:0005623,GO:0005737,GO:0005829,GO:0005886,GO:0006810,GO:0006811,GO:0006817,GO:0006820,GO:0006950,GO:0007154,GO:0008150,GO:0009267,GO:0009605,GO:0009987,GO:0009991,GO:0015698,GO:0016020,GO:0016036,GO:0030312,GO:0031667,GO:0031668,GO:0031669,GO:0033554,GO:0042301,GO:0042594,GO:0043167,GO:0043168,GO:0044424,GO:0044444,GO:0044464,GO:…	-	ko:K02040	ko02010,ko02020,ko05152,map02010,map02020,map05152	M00222	-	-	ko00000,ko00001,ko00002,ko02000	3.A.1.7	-	-	PBP_like_2
lcl|NC_009525.1_cds_WP_003404794.1_981	419947.MRA_0944	1.7e-206	572.0	COG0581@1|root,COG0581@2|Bacteria,2H3XE@201174|Actinobacteria,23D51@1762|Mycobacteriaceae	201174|Actinobacteria	P	Binding-protein-dependent transport system inner membrane component	pstA2	-	-	ko:K02038	ko02010,map02010	M00222	-	-	ko00000,ko00001,ko00002,ko02000	3.A.1.7	-	-	BPD_transp_1
lcl|NC_009525.1_cds_WP_003404795.1_982	419947.MRA_0945	5.06e-194	538.0	COG1273@1|root,COG1273@2|Bacteria,2GJMU@201174|Actinobacteria,232DX@1762|Mycobacteriaceae	201174|Actinobacteria	L	With LigD forms a non-homologous end joining (NHEJ) DNA repair enzyme, which repairs dsDNA breaks with reduced fidelity. Binds linear dsDNA with 5'- and 3'- overhangs but not closed circular dsDNA nor ssDNA. Recruits and stimulates the ligase activity of LigD	ku	GO:0000726,GO:0003674,GO:0003676,GO:0003677,GO:0003690,GO:0005488,GO:0006139,GO:0006259,GO:0006281,GO:0006302,GO:0006303,GO:0006725,GO:0006807,GO:0006950,GO:0006974,GO:0008150,GO:0008152,GO:0009987,GO:0033554,GO:0034641,GO:0043085,GO:0043170,GO:0044093,GO:0044237,GO:0044238,GO:0044260,GO:0046483,GO:0050790,GO:0050896,GO:0051340,GO:0051351,GO:0051716,GO:0065007,GO:0065009,GO:0071704,GO:0090304,GO:…	-	ko:K10979	ko03450,map03450	-	-	-	ko00000,ko00001,ko03400	-	-	-	Ku
lcl|NC_009525.1_cds_WP_003911307.1_983	419947.MRA_0946	0.0	1544.0	COG1793@1|root,COG3285@1|root,COG1793@2|Bacteria,COG3285@2|Bacteria,2GJPX@201174|Actinobacteria,232ZK@1762|Mycobacteriaceae	201174|Actinobacteria	L	DNA ligase	ligD	GO:0000166,GO:0000287,GO:0000726,GO:0003674,GO:0003676,GO:0003677,GO:0003824,GO:0003887,GO:0003896,GO:0003899,GO:0003909,GO:0003910,GO:0004518,GO:0004527,GO:0004529,GO:0004536,GO:0004652,GO:0005488,GO:0005524,GO:0005575,GO:0005623,GO:0005886,GO:0006139,GO:0006259,GO:0006260,GO:0006261,GO:0006266,GO:0006269,GO:0006281,GO:0006302,GO:0006303,GO:0006725,GO:0006807,GO:0006950,GO:0006974,GO:0008144,GO:…	6.5.1.1,6.5.1.6,6.5.1.7	ko:K01971,ko:K10747	ko03030,ko03410,ko03420,ko03430,ko03450,map03030,map03410,map03420,map03430,map03450	-	R00381,R00382,R10822,R10823	RC00005	ko00000,ko00001,ko01000,ko03032,ko03400	-	-	-	DNA_ligase_A_C,DNA_ligase_A_M,LigD_N
lcl|NC_009525.1_cds_WP_003404819.1_985	419947.MRA_0948	1.36e-210	581.0	COG2141@1|root,COG2141@2|Bacteria,2H0K9@201174|Actinobacteria,234PV@1762|Mycobacteriaceae	201174|Actinobacteria	C	COG2141 Coenzyme F420-dependent N5,N10-methylene tetrahydromethanopterin reductase and related flavin-dependent oxidoreductases	-	GO:0005575,GO:0005623,GO:0005886,GO:0016020,GO:0044464,GO:0071944	-	-	-	-	-	-	-	-	-	-	Bac_luciferase
lcl|NC_009525.1_cds_WP_003898656.1_988	419947.MRA_0950	4.77e-247	678.0	COG2072@1|root,COG2072@2|Bacteria,2GNP5@201174|Actinobacteria,233NP@1762|Mycobacteriaceae	201174|Actinobacteria	P	Domain of unknown function (DUF4873)	-	GO:0005575,GO:0005623,GO:0005886,GO:0016020,GO:0044464,GO:0071944	-	-	-	-	-	-	-	-	-	-	DUF4873
lcl|NC_009525.1_cds_WP_003911341.1_990	419947.MRA_0952	2.17e-168	471.0	COG4221@1|root,COG4221@2|Bacteria,2I461@201174|Actinobacteria,233BP@1762|Mycobacteriaceae	201174|Actinobacteria	S	Belongs to the short-chain dehydrogenases reductases (SDR) family	-	-	-	-	-	-	-	-	-	-	-	-	adh_short
lcl|NC_009525.1_cds_WP_003404830.1_991	419947.MRA_0953	0.0	1108.0	COG0166@1|root,COG0166@2|Bacteria,2GJG0@201174|Actinobacteria,233EI@1762|Mycobacteriaceae	201174|Actinobacteria	G	Belongs to the GPI family	pgi	GO:0003674,GO:0003824,GO:0004347,GO:0005575,GO:0005623,GO:0005886,GO:0005975,GO:0006082,GO:0006090,GO:0006091,GO:0006096,GO:0006139,GO:0006163,GO:0006164,GO:0006165,GO:0006725,GO:0006732,GO:0006733,GO:0006753,GO:0006754,GO:0006757,GO:0006793,GO:0006796,GO:0006807,GO:0008150,GO:0008152,GO:0009056,GO:0009058,GO:0009108,GO:0009117,GO:0009123,GO:0009124,GO:0009126,GO:0009127,GO:0009132,GO:0009135,GO:…	5.3.1.9	ko:K01810	ko00010,ko00030,ko00500,ko00520,ko01100,ko01110,ko01120,ko01130,ko01200,map00010,map00030,map00500,map00520,map01100,map01110,map01120,map01130,map01200	M00001,M00004,M00114	R02739,R02740,R03321	RC00376,RC00563	ko00000,ko00001,ko00002,ko01000,ko04147	-	-	-	PGI
lcl|NC_009525.1_cds_WP_003404859.1_995	419947.MRA_0956	0.0	1499.0	COG0210@1|root,COG0210@2|Bacteria,2GISS@201174|Actinobacteria,235EQ@1762|Mycobacteriaceae	201174|Actinobacteria	L	ATP-dependent DNA helicase	pcrA	GO:0000018,GO:0000166,GO:0000287,GO:0003674,GO:0003678,GO:0003824,GO:0004003,GO:0004386,GO:0005488,GO:0005575,GO:0005618,GO:0005622,GO:0005623,GO:0005886,GO:0006139,GO:0006259,GO:0006281,GO:0006302,GO:0006725,GO:0006807,GO:0006950,GO:0006974,GO:0006996,GO:0008026,GO:0008094,GO:0008150,GO:0008152,GO:0009314,GO:0009411,GO:0009416,GO:0009628,GO:0009650,GO:0009892,GO:0009987,GO:0010605,GO:0016020,GO:…	3.6.4.12	ko:K03657	ko03420,ko03430,map03420,map03430	-	-	-	ko00000,ko00001,ko01000,ko03400	-	-	-	UvrD-helicase,UvrD_C
lcl|NC_009525.1_cds_WP_003898659.1_997	419947.MRA_0958	3.51e-272	745.0	COG0045@1|root,COG0045@2|Bacteria,2GKSB@201174|Actinobacteria,235AR@1762|Mycobacteriaceae	201174|Actinobacteria	F	Succinyl-CoA synthetase functions in the citric acid cycle (TCA), coupling the hydrolysis of succinyl-CoA to the synthesis of either ATP or GTP and thus represents the only step of substrate-level phosphorylation in the TCA. The beta subunit provides nucleotide specificity of the enzyme and binds the substrate succinate, while the binding sites for coenzyme A and phosphate are found in the alpha …	sucC	GO:0005575,GO:0005618,GO:0005622,GO:0005623,GO:0005737,GO:0005829,GO:0008150,GO:0030312,GO:0040007,GO:0044424,GO:0044444,GO:0044464,GO:0071944	6.2.1.5	ko:K01903	ko00020,ko00640,ko00660,ko00720,ko01100,ko01110,ko01120,ko01130,ko01200,map00020,map00640,map00660,map00720,map01100,map01110,map01120,map01130,map01200	M00009,M00011,M00173,M00374,M00620	R00405,R02404	RC00004,RC00014	ko00000,ko00001,ko00002,ko01000	-	-	-	ATP-grasp_2,Ligase_CoA
lcl|NC_009525.1_cds_WP_009935735.1_998	419947.MRA_0959	2.5e-206	572.0	COG0074@1|root,COG0074@2|Bacteria,2GK00@201174|Actinobacteria,2333B@1762|Mycobacteriaceae	201174|Actinobacteria	C	Succinyl-CoA synthetase functions in the citric acid cycle (TCA), coupling the hydrolysis of succinyl-CoA to the synthesis of either ATP or GTP and thus represents the only step of substrate-level phosphorylation in the TCA. The alpha subunit of the enzyme binds the substrates coenzyme A and phosphate, while succinate binding and nucleotide specificity is provided by the beta subunit	sucD	GO:0005575,GO:0005618,GO:0005622,GO:0005623,GO:0005737,GO:0005829,GO:0005886,GO:0008150,GO:0016020,GO:0030312,GO:0040007,GO:0044424,GO:0044444,GO:0044464,GO:0071944	6.2.1.5	ko:K01902	ko00020,ko00640,ko00660,ko00720,ko01100,ko01110,ko01120,ko01130,ko01200,map00020,map00640,map00660,map00720,map01100,map01110,map01120,map01130,map01200	M00009,M00011,M00173,M00374,M00620	R00405,R02404	RC00004,RC00014	ko00000,ko00001,ko00002,ko01000	-	-	-	CoA_binding,Ligase_CoA
lcl|NC_009525.1_cds_WP_003404873.1_999	419947.MRA_0960	6.01e-211	582.0	COG2141@1|root,COG2141@2|Bacteria,2GMMJ@201174|Actinobacteria,2355P@1762|Mycobacteriaceae	201174|Actinobacteria	C	COG2141 Coenzyme F420-dependent N5,N10-methylene tetrahydromethanopterin reductase and related flavin-dependent oxidoreductases	rutA_3	-	-	-	-	-	-	-	-	-	-	-	Bac_luciferase
lcl|NC_009525.1_cds_WP_003901049.1_1001	419947.MRA_0962	8.89e-305	833.0	2EKVE@1|root,33EIZ@2|Bacteria,2HI2V@201174|Actinobacteria,234CB@1762|Mycobacteriaceae	201174|Actinobacteria	-	-	-	GO:0008150,GO:0040007	-	-	-	-	-	-	-	-	-	-	-
lcl|NC_009525.1_cds_WP_003898661.1_1002	419947.MRA_0963	1.44e-146	413.0	COG0299@1|root,COG0299@2|Bacteria,2H8QB@201174|Actinobacteria,235YC@1762|Mycobacteriaceae	201174|Actinobacteria	F	Catalyzes the transfer of a formyl group from 10- formyltetrahydrofolate to 5-phospho-ribosyl-glycinamide (GAR), producing 5-phospho-ribosyl-N-formylglycinamide (FGAR) and tetrahydrofolate	purN	GO:0000287,GO:0003674,GO:0005488,GO:0006082,GO:0006575,GO:0006725,GO:0006732,GO:0006760,GO:0006807,GO:0008150,GO:0008152,GO:0009987,GO:0019752,GO:0034641,GO:0042558,GO:0043167,GO:0043169,GO:0043436,GO:0043603,GO:0044237,GO:0044281,GO:0046483,GO:0046653,GO:0046872,GO:0051186,GO:0071704,GO:1901360,GO:1901564	2.1.2.2	ko:K11175	ko00230,ko00670,ko01100,ko01110,ko01130,map00230,map00670,map01100,map01110,map01130	M00048	R04325,R04326	RC00026,RC00197,RC01128	ko00000,ko00001,ko00002,ko01000	-	-	-	Formyl_trans_N
lcl|NC_009525.1_cds_WP_009935682.1_1004	419947.MRA_0965	0.0	881.0	COG1239@1|root,COG1239@2|Bacteria,2GMRS@201174|Actinobacteria,2342M@1762|Mycobacteriaceae	201174|Actinobacteria	H	magnesium chelatase	chlI	-	6.6.1.1	ko:K03405	ko00860,ko01100,ko01110,map00860,map01100,map01110	-	R03877	RC01012	ko00000,ko00001,ko01000	-	-	iNJ661.Rv0958	Mg_chelatase,Sigma54_activat
lcl|NC_009525.1_cds_WP_003916736.1_1009	419947.MRA_0970	9.12e-168	468.0	2BFBR@1|root,3294V@2|Bacteria,2H2B3@201174|Actinobacteria,23CC4@1762|Mycobacteriaceae	201174|Actinobacteria	S	Lipoprotein confined to pathogenic Mycobacterium	lprP	-	-	-	-	-	-	-	-	-	-	-	LppA
lcl|NC_009525.1_cds_WP_003914276.1_1011	419947.MRA_0971	4.42e-191	532.0	COG1506@1|root,COG1506@2|Bacteria,2I506@201174|Actinobacteria,23844@1762|Mycobacteriaceae	201174|Actinobacteria	E	Alpha/beta hydrolase	-	-	-	-	-	-	-	-	-	-	-	-	Abhydrolase_8
lcl|NC_009525.1_cds_WP_003900243.1_1014	419947.MRA_0973	5.75e-141	398.0	COG4758@1|root,COG4758@2|Bacteria,2I8FE@201174|Actinobacteria,232FC@1762|Mycobacteriaceae	201174|Actinobacteria	S	Domain of unknown function (DUF1707)	-	GO:0005575,GO:0005623,GO:0005886,GO:0016020,GO:0044464,GO:0071944	-	-	-	-	-	-	-	-	-	-	DUF1707,DUF2154
lcl|NC_009525.1_cds_WP_009935691.1_1017	419947.MRA_0976	0.0	1441.0	COG2217@1|root,COG2217@2|Bacteria,2GIRF@201174|Actinobacteria,234KA@1762|Mycobacteriaceae	201174|Actinobacteria	P	possibly catalyzes the transport of undetermined metal cation with hydrolyse of ATP catalytic activity ATP H(2)O undetermined metal cation(in) ADP phosphate undetermined metal cation (out)	copA	GO:0005575,GO:0005618,GO:0005623,GO:0005886,GO:0005887,GO:0008150,GO:0009405,GO:0010035,GO:0010038,GO:0016020,GO:0016021,GO:0030312,GO:0031224,GO:0031226,GO:0042221,GO:0044419,GO:0044425,GO:0044459,GO:0044464,GO:0046688,GO:0050896,GO:0051704,GO:0071944	3.6.3.4,3.6.3.54	ko:K01533,ko:K12950,ko:K12951,ko:K12954,ko:K12956,ko:K17686,ko:K21887	ko01524,ko04016,map01524,map04016	-	R00086	RC00002	ko00000,ko00001,ko01000	3.A.3,3.A.3.32,3.A.3.5	-	-	E1-E2_ATPase,HMA,Hydrolase
lcl|NC_009525.1_cds_WP_003898666.1_1018	419947.MRA_0977	5.29e-151	424.0	2EA7C@1|root,334C0@2|Bacteria,2IJPP@201174|Actinobacteria,239V7@1762|Mycobacteriaceae	201174|Actinobacteria	S	Domain of unknown function (DUF5134)	-	-	-	-	-	-	-	-	-	-	-	-	DUF5134
lcl|NC_009525.1_cds_WP_003898667.1_1020	419947.MRA_0979	1.96e-274	751.0	COG1960@1|root,COG1960@2|Bacteria,2GNFB@201174|Actinobacteria,232NI@1762|Mycobacteriaceae	201174|Actinobacteria	I	acyl-CoA dehydrogenase	fadE12	GO:0003674,GO:0003824,GO:0003995,GO:0005575,GO:0005623,GO:0005886,GO:0008150,GO:0008152,GO:0016020,GO:0016491,GO:0016627,GO:0044464,GO:0055114,GO:0071944	-	ko:K00257	-	-	R04547,R04592	RC01942	ko00000,ko01000	-	-	-	Acyl-CoA_dh_1,Acyl-CoA_dh_M,Acyl-CoA_dh_N
lcl|NC_009525.1_cds_WP_003900244.1_1021	419947.MRA_0980	0.0	1299.0	COG4770@1|root,COG4770@2|Bacteria,2GIZP@201174|Actinobacteria,23453@1762|Mycobacteriaceae	201174|Actinobacteria	I	carboxylase	accA2	-	6.4.1.1,6.4.1.3,6.4.1.4	ko:K01959,ko:K01965,ko:K01968	ko00020,ko00280,ko00620,ko00630,ko00640,ko00720,ko01100,ko01120,ko01130,ko01200,ko01230,map00020,map00280,map00620,map00630,map00640,map00720,map01100,map01120,map01130,map01200,map01230	M00036,M00173,M00373,M00620,M00741	R00344,R01859,R04138	RC00040,RC00097,RC00367,RC00609,RC00942	ko00000,ko00001,ko00002,ko01000	-	-	iNJ661.Rv0973c	Biotin_carb_C,Biotin_carb_N,Biotin_lipoyl,CPSase_L_D2
lcl|NC_009525.1_cds_WP_010886097.1_1022	419947.MRA_0981	0.0	1043.0	COG4799@1|root,COG4799@2|Bacteria,2GIRU@201174|Actinobacteria,2329Y@1762|Mycobacteriaceae	201174|Actinobacteria	I	Acetyl-CoA carboxylase, carboxyltransferase component (subunits alpha and beta)	accD2	-	-	-	-	-	-	-	-	-	-	-	Carboxyl_trans
lcl|NC_009525.1_cds_WP_003898670.1_1023	419947.MRA_0982	2.59e-276	755.0	COG1960@1|root,COG1960@2|Bacteria,2GVSU@201174|Actinobacteria,236F2@1762|Mycobacteriaceae	201174|Actinobacteria	I	acyl-CoA dehydrogenase	fadE13	-	1.3.8.7	ko:K00249	ko00071,ko00280,ko00410,ko00640,ko01100,ko01110,ko01130,ko01200,ko01212,ko03320,map00071,map00280,map00410,map00640,map01100,map01110,map01130,map01200,map01212,map03320	M00013,M00036,M00087	R00924,R01175,R01279,R02661,R03172,R03777,R03857,R03990,R04095,R04432,R04751,R04754	RC00052,RC00068,RC00076,RC00095,RC00148,RC00246	ko00000,ko00001,ko00002,ko01000	-	-	-	Acyl-CoA_dh_1,Acyl-CoA_dh_M,Acyl-CoA_dh_N
lcl|NC_009525.1_cds_WP_012054167.1_1025	419947.MRA_0984	2.71e-246	722.0	COG0657@1|root,COG0657@2|Bacteria,2IFCE@201174|Actinobacteria,238S0@1762|Mycobacteriaceae	201174|Actinobacteria	I	acetylesterase activity	-	-	-	-	-	-	-	-	-	-	-	-	PE
lcl|NC_009525.1_cds_WP_003901965.1_1031	419947.MRA_0987	3.57e-29	116.0	COG3391@1|root,COG3391@2|Bacteria,2IKEV@201174|Actinobacteria,239K3@1762|Mycobacteriaceae	201174|Actinobacteria	S	Large extracellular alpha-helical protein	-	-	-	-	-	-	-	-	-	-	-	-	NHL,PE
lcl|NC_009525.1_cds_MRA_RS05190_1033	419947.MRA_0987	4.67e-99	306.0	COG3391@1|root,COG3391@2|Bacteria,2IKEV@201174|Actinobacteria,239K3@1762|Mycobacteriaceae	201174|Actinobacteria	S	Large extracellular alpha-helical protein	-	-	-	-	-	-	-	-	-	-	-	-	NHL,PE
lcl|NC_009525.1_cds_WP_003916757.1_1034	419947.MRA_0988	3.25e-159	446.0	COG0745@1|root,COG0745@2|Bacteria,2GIZB@201174|Actinobacteria,233IU@1762|Mycobacteriaceae	201174|Actinobacteria	K	Member of the two-component regulatory system MprB MprA which contributes to maintaining a balance among several systems involved in stress resistance and is required for establishment and maintenance of persistent infection in the host. Functions as a transcriptional regulator that recognizes a 19-bp nucleotide motif comprizing two loosely conserved 8-bp direct DNA-binding motif repeats separate…	mprA	GO:0000160,GO:0003674,GO:0003676,GO:0003677,GO:0005488,GO:0005575,GO:0005618,GO:0005623,GO:0005886,GO:0006355,GO:0007154,GO:0007165,GO:0008150,GO:0009268,GO:0009628,GO:0009889,GO:0009890,GO:0009891,GO:0009892,GO:0009893,GO:0009987,GO:0010446,GO:0010468,GO:0010556,GO:0010557,GO:0010558,GO:0010604,GO:0010605,GO:0010628,GO:0010629,GO:0016020,GO:0019219,GO:0019222,GO:0023052,GO:0030312,GO:0031323,GO:…	-	ko:K07669,ko:K07672	ko02020,map02020	M00460,M00463	-	-	ko00000,ko00001,ko00002,ko02022	-	-	-	Response_reg,Trans_reg_C
lcl|NC_009525.1_cds_WP_003911317.1_1035	419947.MRA_0989	0.0	951.0	COG0642@1|root,COG2972@1|root,COG2205@2|Bacteria,COG2972@2|Bacteria,2GM17@201174|Actinobacteria,236PZ@1762|Mycobacteriaceae	201174|Actinobacteria	T	Member of the two-component regulatory system MprB MprA which contributes to maintaining a balance among several systems involved in stress resistance and is required for establishment and maintenance of persistent infection in the host. In response to environmental signals MprB acts as both a membrane-associated protein kinase that undergoes autophosphorylation and subsequently transfers the pho…	mprB	GO:0000160,GO:0003674,GO:0003824,GO:0004721,GO:0005575,GO:0005576,GO:0005623,GO:0005886,GO:0006464,GO:0006468,GO:0006470,GO:0006793,GO:0006796,GO:0006807,GO:0007154,GO:0007165,GO:0008150,GO:0008152,GO:0009987,GO:0016020,GO:0016301,GO:0016310,GO:0016311,GO:0016740,GO:0016772,GO:0016787,GO:0016788,GO:0016791,GO:0018106,GO:0018193,GO:0018202,GO:0019538,GO:0023052,GO:0035556,GO:0036211,GO:0040007,GO:…	2.7.13.3	ko:K07653	ko02020,map02020	M00460	-	-	ko00000,ko00001,ko00002,ko01000,ko01001,ko02022	-	-	-	HAMP,HATPase_c,HisKA
lcl|NC_009525.1_cds_WP_010886101.1_1036	419947.MRA_0990	2.29e-284	783.0	COG0265@1|root,COG0265@2|Bacteria,2GJ96@201174|Actinobacteria,232J2@1762|Mycobacteriaceae	201174|Actinobacteria	O	COG0265 Trypsin-like serine proteases, typically periplasmic, contain C-terminal PDZ domain	pepD	-	-	ko:K08372	ko02020,map02020	-	-	-	ko00000,ko00001,ko01000,ko01002	-	-	-	PDZ_2,Trypsin_2
lcl|NC_009525.1_cds_WP_003405127.1_1037	419947.MRA_0991	2.77e-116	334.0	COG0521@1|root,COG0521@2|Bacteria,2IACJ@201174|Actinobacteria,233MQ@1762|Mycobacteriaceae	201174|Actinobacteria	H	molybdenum cofactor	moaB	-	4.2.1.96	ko:K01724	ko00790,map00790	-	R04734	RC01208	ko00000,ko00001,ko01000,ko04147	-	-	-	MoCF_biosynth
lcl|NC_009525.1_cds_WP_003405128.1_1038	419947.MRA_0992	4.7e-98	285.0	COG1970@1|root,COG1970@2|Bacteria,2IQDN@201174|Actinobacteria,2391B@1762|Mycobacteriaceae	201174|Actinobacteria	M	Channel that opens in response to stretch forces in the membrane lipid bilayer. May participate in the regulation of osmotic pressure changes within the cell	mscL	GO:0003674,GO:0005215,GO:0005488,GO:0005515,GO:0005575,GO:0005623,GO:0005886,GO:0005887,GO:0006810,GO:0006811,GO:0006884,GO:0008150,GO:0008361,GO:0008381,GO:0009987,GO:0009992,GO:0015267,GO:0016020,GO:0016021,GO:0016043,GO:0019725,GO:0022803,GO:0022836,GO:0022857,GO:0030104,GO:0031224,GO:0031226,GO:0032535,GO:0042592,GO:0042802,GO:0044425,GO:0044459,GO:0044464,GO:0048878,GO:0051179,GO:0051234,GO:…	-	ko:K03282	-	-	-	-	ko00000,ko02000	1.A.22.1	-	-	MscL
lcl|NC_009525.1_cds_WP_003900248.1_1039	419947.MRA_0993	1.62e-173	484.0	COG1136@1|root,COG1136@2|Bacteria,2GJN6@201174|Actinobacteria,233TP@1762|Mycobacteriaceae	201174|Actinobacteria	V	ABC transporter	-	GO:0008150,GO:0009405,GO:0009605,GO:0009607,GO:0043207,GO:0044403,GO:0044419,GO:0050896,GO:0051701,GO:0051704,GO:0051707,GO:0052173,GO:0052200,GO:0052564,GO:0052572,GO:0075136	-	ko:K02003,ko:K02004	-	M00258	-	-	ko00000,ko00002,ko02000	3.A.1	-	-	ABC_tran,FtsX
lcl|NC_009525.1_cds_WP_003915882.1_1040	419947.MRA_0994	0.0	1615.0	COG0577@1|root,COG0577@2|Bacteria,2GJTZ@201174|Actinobacteria,2335I@1762|Mycobacteriaceae	201174|Actinobacteria	V	ABC-type transport system, involved in lipoprotein release, permease component	-	-	-	ko:K02004	-	M00258	-	-	ko00000,ko00002,ko02000	3.A.1	-	-	FtsX,MacB_PCD
lcl|NC_009525.1_cds_WP_003898675.1_1041	419947.MRA_0995	5.77e-291	793.0	COG5621@1|root,COG5621@2|Bacteria,2IEHI@201174|Actinobacteria	201174|Actinobacteria	S	Lipocalin-like domain	-	-	-	-	-	-	-	-	-	-	-	-	CrtC,Lipocalin_9
lcl|NC_009525.1_cds_WP_010886102.1_1042	419947.MRA_0996	9.03e-230	633.0	COG0142@1|root,COG0142@2|Bacteria,2GMB4@201174|Actinobacteria,2357W@1762|Mycobacteriaceae	201174|Actinobacteria	H	Belongs to the FPP GGPP synthase family	hepT	-	2.5.1.30	ko:K00805	ko00900,ko01110,map00900,map01110	-	R09247	RC00279	ko00000,ko00001,ko01000,ko01006	-	-	-	polyprenyl_synt
lcl|NC_009525.1_cds_WP_003898677.1_1043	419947.MRA_0997	1.54e-138	393.0	COG3745@1|root,COG3745@2|Bacteria,2GQJH@201174|Actinobacteria,238MI@1762|Mycobacteriaceae	201174|Actinobacteria	U	Flagellar basal body P-ring biosynthesis protein	-	-	-	-	-	-	-	-	-	-	-	-	ChapFlgA,RcpC,SAF
lcl|NC_009525.1_cds_WP_003901063.1_1045	419947.MRA_0999	1.79e-138	391.0	COG0212@1|root,COG0212@2|Bacteria,2IKWR@201174|Actinobacteria,238KT@1762|Mycobacteriaceae	201174|Actinobacteria	H	Belongs to the 5-formyltetrahydrofolate cyclo-ligase family	ygfA	-	6.3.3.2	ko:K01934	ko00670,ko01100,map00670,map01100	-	R02301	RC00183	ko00000,ko00001,ko01000	-	-	-	5-FTHF_cyc-lig
lcl|NC_009525.1_cds_WP_003911320.1_1046	419947.MRA_1000	4.22e-214	592.0	COG1210@1|root,COG1210@2|Bacteria,2I2EW@201174|Actinobacteria,235MM@1762|Mycobacteriaceae	201174|Actinobacteria	M	UDP-glucose pyrophosphorylase	galU	-	2.7.7.9	ko:K00963	ko00040,ko00052,ko00500,ko00520,ko01100,ko01130,map00040,map00052,map00500,map00520,map01100,map01130	M00129,M00361,M00362,M00549	R00289	RC00002	ko00000,ko00001,ko00002,ko01000	-	-	-	NTP_transferase
lcl|NC_009525.1_cds_WP_003898680.1_1047	419947.MRA_1001	1.01e-293	803.0	COG0303@1|root,COG0303@2|Bacteria,2GJC3@201174|Actinobacteria,23429@1762|Mycobacteriaceae	201174|Actinobacteria	H	Molybdenum cofactor synthesis	moeA	GO:0003674,GO:0003824,GO:0005575,GO:0005622,GO:0005623,GO:0005737,GO:0005829,GO:0005886,GO:0006139,GO:0006163,GO:0006464,GO:0006725,GO:0006732,GO:0006753,GO:0006777,GO:0006793,GO:0006796,GO:0006807,GO:0008150,GO:0008152,GO:0009058,GO:0009108,GO:0009116,GO:0009117,GO:0009119,GO:0009141,GO:0009144,GO:0009150,GO:0009199,GO:0009205,GO:0009259,GO:0009987,GO:0016020,GO:0016740,GO:0016772,GO:0016779,GO:…	2.10.1.1,2.7.7.9	ko:K00963,ko:K03750	ko00040,ko00052,ko00500,ko00520,ko00790,ko01100,ko01130,map00040,map00052,map00500,map00520,map00790,map01100,map01130	M00129,M00361,M00362,M00549	R00289,R09735	RC00002,RC03462	ko00000,ko00001,ko00002,ko01000	-	-	-	MoCF_biosynth,MoeA_C,MoeA_N
lcl|NC_009525.1_cds_WP_003901065.1_1049	419947.MRA_1003	2.24e-226	627.0	2EA6G@1|root,334B8@2|Bacteria,2GNTV@201174|Actinobacteria,2334Z@1762|Mycobacteriaceae	201174|Actinobacteria	-	-	-	-	-	-	-	-	-	-	-	-	-	-	-
lcl|NC_009525.1_cds_WP_003913180.1_1056	419947.MRA_1009	6.88e-145	408.0	COG3145@1|root,COG3145@2|Bacteria,2GNBD@201174|Actinobacteria,233H3@1762|Mycobacteriaceae	201174|Actinobacteria	L	DNA repair protein	-	-	-	-	-	-	-	-	-	-	-	-	2OG-FeII_Oxy_2
lcl|NC_009525.1_cds_WP_003405169.1_1057	419947.MRA_1010	6.49e-287	784.0	COG2235@1|root,COG2235@2|Bacteria,2GJTR@201174|Actinobacteria,234KW@1762|Mycobacteriaceae	201174|Actinobacteria	E	Arginine	arcA	GO:0005575,GO:0005623,GO:0005886,GO:0016020,GO:0044464,GO:0071944	3.5.3.6	ko:K01478	ko00220,ko01100,ko01110,ko01130,map00220,map01100,map01110,map01130	-	R00552	RC00177	ko00000,ko00001,ko01000	-	-	-	Amidinotransf
lcl|NC_009525.1_cds_WP_003901066.1_1058	419947.MRA_1011	0.0	1036.0	COG4346@1|root,COG4346@2|Bacteria,2GITT@201174|Actinobacteria,2338D@1762|Mycobacteriaceae	201174|Actinobacteria	O	Dolichyl-phosphate-mannose--protein O-mannosyl transferase	pmt	GO:0000030,GO:0003674,GO:0003824,GO:0006464,GO:0006486,GO:0006493,GO:0006807,GO:0008150,GO:0008152,GO:0009058,GO:0009059,GO:0009100,GO:0009101,GO:0009987,GO:0016740,GO:0016757,GO:0016758,GO:0019538,GO:0034645,GO:0035268,GO:0035269,GO:0036211,GO:0040007,GO:0043170,GO:0043412,GO:0043413,GO:0044237,GO:0044238,GO:0044249,GO:0044260,GO:0044267,GO:0070085,GO:0071704,GO:0097502,GO:1901135,GO:1901137,GO:…	2.4.1.109	ko:K00728	ko00514,ko00515,ko01100,map00514,map00515,map01100	-	R04072,R07620,R11399	RC00005,RC00059,RC00397	ko00000,ko00001,ko01000,ko01003	-	GT39	-	PMT,PMT_2,PMT_4TMC
lcl|NC_009525.1_cds_WP_003405173.1_1059	419947.MRA_1012	1.28e-193	538.0	COG0313@1|root,COG0313@2|Bacteria,2GJ9Q@201174|Actinobacteria,234NJ@1762|Mycobacteriaceae	201174|Actinobacteria	H	Catalyzes the 2'-O-methylation of the ribose of cytidine 1402 (C1402) in 16S rRNA	rsmI	GO:0000154,GO:0000451,GO:0000453,GO:0001510,GO:0005575,GO:0005623,GO:0005886,GO:0006139,GO:0006364,GO:0006396,GO:0006725,GO:0006807,GO:0008150,GO:0008152,GO:0009451,GO:0009987,GO:0010467,GO:0016020,GO:0016070,GO:0016072,GO:0022613,GO:0031167,GO:0032259,GO:0034470,GO:0034641,GO:0034660,GO:0042254,GO:0043170,GO:0043412,GO:0043414,GO:0044085,GO:0044237,GO:0044238,GO:0044260,GO:0044464,GO:0046483,GO:…	2.1.1.198	ko:K07056	-	-	-	-	ko00000,ko01000,ko03009	-	-	-	TP_methylase
lcl|NC_009525.1_cds_WP_003911321.1_1063	419947.MRA_1016	0.0	1041.0	COG0143@1|root,COG0143@2|Bacteria,2GK4S@201174|Actinobacteria,23347@1762|Mycobacteriaceae	201174|Actinobacteria	J	Is required not only for elongation of protein synthesis but also for the initiation of all mRNA translation through initiator tRNA(fMet) aminoacylation	metG	GO:0003674,GO:0003824,GO:0004812,GO:0004825,GO:0005575,GO:0005622,GO:0005623,GO:0005737,GO:0005886,GO:0006082,GO:0006139,GO:0006399,GO:0006412,GO:0006418,GO:0006431,GO:0006518,GO:0006520,GO:0006725,GO:0006807,GO:0008150,GO:0008152,GO:0009058,GO:0009059,GO:0009987,GO:0010467,GO:0016020,GO:0016070,GO:0016874,GO:0016875,GO:0019538,GO:0019752,GO:0034641,GO:0034645,GO:0034660,GO:0040007,GO:0043038,GO:…	6.1.1.10	ko:K01874	ko00450,ko00970,map00450,map00970	M00359,M00360	R03659,R04773	RC00055,RC00523	ko00000,ko00001,ko00002,ko01000,ko01007,ko03016	-	-	-	Anticodon_1,tRNA-synt_1g
lcl|NC_009525.1_cds_WP_003916762.1_1064	419947.MRA_1017	6.58e-189	525.0	COG0084@1|root,COG0084@2|Bacteria,2GMJJ@201174|Actinobacteria,233DI@1762|Mycobacteriaceae	201174|Actinobacteria	L	TatD family	tatD	GO:0003674,GO:0003824,GO:0004518,GO:0004536,GO:0005575,GO:0005623,GO:0005886,GO:0006139,GO:0006259,GO:0006308,GO:0006725,GO:0006807,GO:0008150,GO:0008152,GO:0009056,GO:0009057,GO:0009987,GO:0016020,GO:0016787,GO:0016788,GO:0019439,GO:0034641,GO:0034655,GO:0043170,GO:0044237,GO:0044238,GO:0044248,GO:0044260,GO:0044265,GO:0044270,GO:0044464,GO:0046483,GO:0046700,GO:0071704,GO:0071944,GO:0090304,GO:…	-	ko:K03424	-	-	-	-	ko00000,ko01000	-	-	-	TatD_DNase
lcl|NC_009525.1_cds_WP_023637366.1_1065	419947.MRA_1018	1.29e-251	692.0	COG3583@1|root,COG3583@2|Bacteria,2H4RU@201174|Actinobacteria,235V0@1762|Mycobacteriaceae	201174|Actinobacteria	L	Resuscitation-promoting factor rpfB	rpfB	GO:0005575,GO:0005576,GO:0008150,GO:0009892,GO:0009893,GO:0010468,GO:0010604,GO:0010605,GO:0010628,GO:0010629,GO:0019222,GO:0022611,GO:0032502,GO:0040008,GO:0040009,GO:0040010,GO:0044111,GO:0044114,GO:0044115,GO:0044403,GO:0044419,GO:0045927,GO:0048518,GO:0048519,GO:0050789,GO:0051704,GO:0060255,GO:0065007,GO:0085016	-	ko:K21688	-	-	-	-	ko00000	-	-	-	DUF348,G5,Transglycosylas
lcl|NC_009525.1_cds_WP_003405191.1_1066	419947.MRA_1019	3.92e-220	608.0	COG0030@1|root,COG0030@2|Bacteria,2GKBT@201174|Actinobacteria,232YK@1762|Mycobacteriaceae	201174|Actinobacteria	J	Specifically dimethylates two adjacent adenosines (A1518 and A1519) in the loop of a conserved hairpin near the 3'-end of 16S rRNA in the 30S particle. May play a critical role in biogenesis of 30S subunits	ksgA	GO:0000154,GO:0000179,GO:0001510,GO:0003674,GO:0003824,GO:0005575,GO:0005622,GO:0005623,GO:0005737,GO:0006139,GO:0006364,GO:0006396,GO:0006725,GO:0006807,GO:0008150,GO:0008152,GO:0008168,GO:0008170,GO:0008173,GO:0008649,GO:0008757,GO:0009451,GO:0009987,GO:0010467,GO:0016070,GO:0016072,GO:0016433,GO:0016740,GO:0016741,GO:0022613,GO:0031167,GO:0032259,GO:0034470,GO:0034641,GO:0034660,GO:0042254,GO:…	2.1.1.182	ko:K02528	-	-	R10716	RC00003,RC03257	ko00000,ko01000,ko03009	-	-	-	RrnaAD
lcl|NC_009525.1_cds_WP_003405202.1_1069	419947.MRA_1021	0.0	1071.0	COG0318@1|root,COG0318@2|Bacteria,2GMQP@201174|Actinobacteria,232VP@1762|Mycobacteriaceae	201174|Actinobacteria	IQ	Activates fatty acids by binding to coenzyme A	pks16	GO:0003674,GO:0003824,GO:0005575,GO:0005618,GO:0005623,GO:0005886,GO:0006082,GO:0006629,GO:0006631,GO:0006633,GO:0008150,GO:0008152,GO:0008610,GO:0009058,GO:0009987,GO:0016020,GO:0016053,GO:0016740,GO:0016772,GO:0016779,GO:0019752,GO:0030312,GO:0032787,GO:0043436,GO:0044237,GO:0044238,GO:0044249,GO:0044255,GO:0044281,GO:0044283,GO:0044464,GO:0046394,GO:0070566,GO:0071704,GO:0071944,GO:0072330,GO:…	-	ko:K00666	-	-	-	-	ko00000,ko01000,ko01004	-	-	-	AMP-binding,AMP-binding_C_2
lcl|NC_009525.1_cds_WP_003405251.1_1070	419947.MRA_1022	1.73e-133	378.0	COG0193@1|root,COG0193@2|Bacteria,2GKCV@201174|Actinobacteria,2340N@1762|Mycobacteriaceae	201174|Actinobacteria	J	The natural substrate for this enzyme may be peptidyl- tRNAs which drop off the ribosome during protein synthesis	pth	GO:0003674,GO:0003824,GO:0004045,GO:0005575,GO:0005623,GO:0005886,GO:0008150,GO:0016020,GO:0016787,GO:0016788,GO:0040007,GO:0044464,GO:0052689,GO:0071944,GO:0140098,GO:0140101	3.1.1.29	ko:K01056	-	-	-	-	ko00000,ko01000,ko03012	-	-	-	Pept_tRNA_hydro
lcl|NC_009525.1_cds_WP_003405273.1_1076	419947.MRA_1028	0.0	2397.0	COG1197@1|root,COG1197@2|Bacteria,2GJ42@201174|Actinobacteria,2329T@1762|Mycobacteriaceae	201174|Actinobacteria	L	Couples transcription and DNA repair by recognizing RNA polymerase (RNAP) stalled at DNA lesions. Mediates ATP-dependent release of RNAP and its truncated transcript from the DNA, and recruitment of nucleotide excision repair machinery to the damaged site	mfd	GO:0005575,GO:0005622,GO:0005623,GO:0005737,GO:0005829,GO:0005886,GO:0016020,GO:0044424,GO:0044444,GO:0044464,GO:0071944	-	ko:K03723	ko03420,map03420	-	-	-	ko00000,ko00001,ko01000,ko03400	-	-	-	CarD_CdnL_TRCF,DEAD,Helicase_C,TRCF
lcl|NC_009525.1_cds_WP_003916743.1_1077	419947.MRA_1029	7.11e-227	625.0	COG1694@1|root,COG3956@2|Bacteria,2GNKC@201174|Actinobacteria,234CA@1762|Mycobacteriaceae	201174|Actinobacteria	S	pyrophosphohydrolase	mazG	GO:0000287,GO:0003674,GO:0003824,GO:0005488,GO:0005575,GO:0005618,GO:0005623,GO:0006139,GO:0006163,GO:0006195,GO:0006203,GO:0006213,GO:0006220,GO:0006244,GO:0006725,GO:0006753,GO:0006793,GO:0006796,GO:0006807,GO:0006950,GO:0006979,GO:0008150,GO:0008152,GO:0009056,GO:0009058,GO:0009116,GO:0009117,GO:0009119,GO:0009141,GO:0009143,GO:0009144,GO:0009146,GO:0009147,GO:0009149,GO:0009151,GO:0009155,GO:…	3.6.1.66	ko:K02428,ko:K02499	ko00230,map00230	-	R00426,R00720,R01855,R02100,R02720,R03531	RC00002	ko00000,ko00001,ko01000,ko03036	-	-	-	MazG
lcl|NC_009525.1_cds_WP_003900256.1_1078	419947.MRA_1030	6.9e-177	492.0	COG2951@1|root,COG2951@2|Bacteria,2GX49@201174|Actinobacteria,233T3@1762|Mycobacteriaceae	201174|Actinobacteria	M	Transglycosylase SLT domain	lpqU	-	-	-	-	-	-	-	-	-	-	-	SLT_2
lcl|NC_009525.1_cds_WP_003898693.1_1079	419947.MRA_1031	1.94e-304	830.0	COG4948@1|root,COG4948@2|Bacteria,2I4EW@201174|Actinobacteria,23F6E@1762|Mycobacteriaceae	201174|Actinobacteria	F	Catalyzes the reversible conversion of 2- phosphoglycerate into phosphoenolpyruvate. It is essential for the degradation of carbohydrates via glycolysis	eno	GO:0005575,GO:0005618,GO:0005623,GO:0005886,GO:0008150,GO:0016020,GO:0030312,GO:0040007,GO:0044464,GO:0071944	4.2.1.11	ko:K01689	ko00010,ko00680,ko01100,ko01110,ko01120,ko01130,ko01200,ko01230,ko03018,ko04066,map00010,map00680,map01100,map01110,map01120,map01130,map01200,map01230,map03018,map04066	M00001,M00002,M00003,M00346,M00394	R00658	RC00349	ko00000,ko00001,ko00002,ko01000,ko03019,ko04147	-	-	-	Enolase_C,Enolase_N
lcl|NC_009525.1_cds_WP_003915886.1_1085	419947.MRA_1036	0.0	1617.0	COG0642@1|root,COG2205@2|Bacteria,2GJKC@201174|Actinobacteria,234T4@1762|Mycobacteriaceae	201174|Actinobacteria	T	Histidine kinase	kdpD	GO:0005575,GO:0005622,GO:0005623,GO:0005737,GO:0005886,GO:0016020,GO:0044424,GO:0044464,GO:0071944	2.7.13.3	ko:K07646	ko02020,map02020	M00454	-	-	ko00000,ko00001,ko00002,ko01000,ko01001,ko02022	-	-	-	DUF4118,HATPase_c,HisKA,KdpD,Usp
lcl|NC_009525.1_cds_WP_003405320.1_1089	419947.MRA_1038	0.0	1294.0	COG2216@1|root,COG2216@2|Bacteria,2GIWT@201174|Actinobacteria,234VJ@1762|Mycobacteriaceae	201174|Actinobacteria	P	Part of the high-affinity ATP-driven potassium transport (or Kdp) system, which catalyzes the hydrolysis of ATP coupled with the electrogenic transport of potassium into the cytoplasm. This subunit is responsible for energy coupling to the transport system	kdpB	-	3.6.3.12	ko:K01547	ko02020,map02020	-	-	-	ko00000,ko00001,ko01000	3.A.3.7	-	-	E1-E2_ATPase,Hydrolase
lcl|NC_009525.1_cds_WP_003405370.1_1097	419947.MRA_1048	1.13e-166	469.0	29WFN@1|root,30I1I@2|Bacteria,2IASC@201174|Actinobacteria,237N0@1762|Mycobacteriaceae	201174|Actinobacteria	S	Polymorphic PE/PPE proteins C terminal	-	-	-	-	-	-	-	-	-	-	-	-	PE,PE_PPE_C
lcl|NC_009525.1_cds_WP_009936438.1_1098	164757.Mjls_4598	7.69e-29	111.0	COG3550@1|root,COG3550@2|Bacteria,2IC2H@201174|Actinobacteria,236XI@1762|Mycobacteriaceae	201174|Actinobacteria	S	peptidyl-serine autophosphorylation	-	-	-	-	-	-	-	-	-	-	-	-	-
lcl|NC_009525.1_cds_WP_003405595.1_1106	419947.MRA_1058	4.56e-99	288.0	COG1846@1|root,COG1846@2|Bacteria,2IKIR@201174|Actinobacteria	201174|Actinobacteria	K	MarR family	-	-	-	-	-	-	-	-	-	-	-	-	MarR,MarR_2
lcl|NC_009525.1_cds_WP_003907556.1_1112	419947.MRA_1063	3.61e-75	224.0	COG0582@1|root,COG0582@2|Bacteria,2GISN@201174|Actinobacteria,23F6N@1762|Mycobacteriaceae	201174|Actinobacteria	L	Belongs to the 'phage' integrase family	int8	-	-	-	-	-	-	-	-	-	-	-	Arm-DNA-bind_4,Phage_int_SAM_3,Phage_integrase
lcl|NC_009525.1_cds_WP_003900263.1_1114	419947.MRA_1065	1.64e-194	538.0	COG2343@1|root,COG2343@2|Bacteria,2IKUM@201174|Actinobacteria,23444@1762|Mycobacteriaceae	201174|Actinobacteria	IQ	Domain of unknown function (DUF427)	-	-	-	-	-	-	-	-	-	-	-	-	NTP_transf_9
lcl|NC_009525.1_cds_WP_003405622.1_1116	419947.MRA_1067	6.53e-255	702.0	COG3391@1|root,COG3391@2|Bacteria,2HH8B@201174|Actinobacteria,2332R@1762|Mycobacteriaceae	201174|Actinobacteria	S	amine dehydrogenase activity	-	-	-	-	-	-	-	-	-	-	-	-	-
lcl|NC_009525.1_cds_WP_003405640.1_1121	419947.MRA_1072	1.56e-194	540.0	COG1752@1|root,COG1752@2|Bacteria,2IB0F@201174|Actinobacteria,23355@1762|Mycobacteriaceae	201174|Actinobacteria	S	esterase of the alpha-beta hydrolase superfamily	-	-	-	ko:K07001	-	-	-	-	ko00000	-	-	-	Patatin
lcl|NC_009525.1_cds_WP_010886105.1_1126	419947.MRA_1077	1.96e-73	257.0	COG0657@1|root,COG0657@2|Bacteria,2I9XV@201174|Actinobacteria,2365I@1762|Mycobacteriaceae	201174|Actinobacteria	I	acetylesterase activity	-	-	-	-	-	-	-	-	-	-	-	-	PE
lcl|NC_009525.1_cds_WP_012054171.1_1127	419947.MRA_1078	3.59e-83	271.0	COG0657@1|root,COG0657@2|Bacteria,2I9XV@201174|Actinobacteria,2365I@1762|Mycobacteriaceae	201174|Actinobacteria	I	acetylesterase activity	-	-	-	-	-	-	-	-	-	-	-	-	PE
lcl|NC_009525.1_cds_WP_003405708.1_1128	419947.MRA_1079	0.0	1186.0	COG4425@1|root,COG4425@2|Bacteria,2GKB5@201174|Actinobacteria,233TZ@1762|Mycobacteriaceae	201174|Actinobacteria	S	membrane	-	-	-	-	-	-	-	-	-	-	-	-	Abhydrolase_9,Abhydrolase_9_N
lcl|NC_009525.1_cds_WP_003405719.1_1131	419947.MRA_1082	1.09e-186	520.0	COG4760@1|root,COG4760@2|Bacteria,2GNCK@201174|Actinobacteria,235D1@1762|Mycobacteriaceae	201174|Actinobacteria	S	membrane	-	-	-	-	-	-	-	-	-	-	-	-	BaxI_1
lcl|NC_009525.1_cds_WP_003405724.1_1133	419947.MRA_1084	6.85e-295	804.0	COG0183@1|root,COG0183@2|Bacteria,2GJAC@201174|Actinobacteria,23617@1762|Mycobacteriaceae	201174|Actinobacteria	I	Belongs to the thiolase family	fadA3	GO:0003674,GO:0003676,GO:0003723,GO:0003729,GO:0003824,GO:0003988,GO:0005488,GO:0005575,GO:0005622,GO:0005623,GO:0005737,GO:0005739,GO:0005740,GO:0005758,GO:0005777,GO:0005782,GO:0006082,GO:0006629,GO:0006631,GO:0006635,GO:0008150,GO:0008152,GO:0009056,GO:0009062,GO:0009987,GO:0016042,GO:0016054,GO:0016408,GO:0016740,GO:0016746,GO:0016747,GO:0019395,GO:0019752,GO:0030258,GO:0031907,GO:0031967,GO:…	2.3.1.9	ko:K00626	ko00071,ko00072,ko00280,ko00310,ko00362,ko00380,ko00620,ko00630,ko00640,ko00650,ko00720,ko00900,ko01100,ko01110,ko01120,ko01130,ko01200,ko01212,ko02020,map00071,map00072,map00280,map00310,map00362,map00380,map00620,map00630,map00640,map00650,map00720,map00900,map01100,map01110,map01120,map01130,map01200,map01212,map02020	M00088,M00095,M00373,M00374,M00375	R00238,R01177	RC00004,RC00326	ko00000,ko00001,ko00002,ko01000,ko04147	-	-	-	Thiolase_C,Thiolase_N
lcl|NC_009525.1_cds_WP_003405728.1_1135	557599.MKAN_08145	8.98e-220	610.0	COG0657@1|root,COG0657@2|Bacteria,2GKCQ@201174|Actinobacteria,232JC@1762|Mycobacteriaceae	201174|Actinobacteria	I	Alpha beta hydrolase	lipU	-	-	-	-	-	-	-	-	-	-	-	Abhydrolase_3
lcl|NC_009525.1_cds_WP_003901991.1_1137	419947.MRA_1088	1.25e-118	345.0	COG1714@1|root,COG1714@2|Bacteria,2HGSH@201174|Actinobacteria,232GQ@1762|Mycobacteriaceae	201174|Actinobacteria	S	pfam rdd	pra	GO:0005575,GO:0005576,GO:0005618,GO:0005623,GO:0005886,GO:0016020,GO:0030312,GO:0044464,GO:0071944	-	-	-	-	-	-	-	-	-	-	RDD
lcl|NC_009525.1_cds_WP_003405742.1_1139	419947.MRA_1090	1.17e-111	321.0	COG0782@1|root,COG0782@2|Bacteria,2GNZV@201174|Actinobacteria,233YD@1762|Mycobacteriaceae	201174|Actinobacteria	K	Necessary for efficient RNA polymerase transcription elongation past template-encoded arresting sites. The arresting sites in DNA have the property of trapping a certain fraction of elongating RNA polymerases that pass through, resulting in locked ternary complexes. Cleavage of the nascent transcript by cleavage factors such as GreA or GreB allows the resumption of elongation from the new 3'termi…	greA	GO:0005575,GO:0005618,GO:0005622,GO:0005623,GO:0005737,GO:0005829,GO:0005886,GO:0008150,GO:0016020,GO:0030312,GO:0042221,GO:0044424,GO:0044444,GO:0044464,GO:0046677,GO:0050896,GO:0071944	-	ko:K03624	-	-	-	-	ko00000,ko03021	-	-	-	GreA_GreB,GreA_GreB_N
lcl|NC_009525.1_cds_WP_003405750.1_1143	419947.MRA_1094	0.0	1332.0	COG1331@1|root,COG1331@2|Bacteria,2GJ88@201174|Actinobacteria,233KS@1762|Mycobacteriaceae	201174|Actinobacteria	O	Protein of unknown function, DUF255	-	-	-	ko:K06888	-	-	-	-	ko00000	-	-	-	GlcNAc_2-epim,Thioredox_DsbH
lcl|NC_009525.1_cds_WP_003901993.1_1144	419947.MRA_1095	2.4e-172	481.0	COG1272@1|root,COG1272@2|Bacteria,2GJGQ@201174|Actinobacteria,234HY@1762|Mycobacteriaceae	201174|Actinobacteria	S	protein, hemolysin III	hlyI	-	-	ko:K11068	-	-	-	-	ko00000,ko02042	-	-	-	HlyIII
lcl|NC_009525.1_cds_MRA_RS21195_1153	419947.MRA_1102	1.95e-90	297.0	COG3391@1|root,COG3391@2|Bacteria	2|Bacteria	CO	amine dehydrogenase activity	-	-	-	-	-	-	-	-	-	-	-	-	HYR,HtaA,NHL,Neocarzinostat,PE
lcl|NC_009525.1_cds_WP_003916776.1_1155	419947.MRA_1104	3.76e-305	832.0	COG0112@1|root,COG0112@2|Bacteria,2GK7U@201174|Actinobacteria,233GB@1762|Mycobacteriaceae	201174|Actinobacteria	E	Catalyzes the reversible interconversion of serine and glycine with tetrahydrofolate (THF) serving as the one-carbon carrier. This reaction serves as the major source of one-carbon groups required for the biosynthesis of purines, thymidylate, methionine, and other important biomolecules. Also exhibits THF- independent aldolase activity toward beta-hydroxyamino acids, producing glycine and aldehyd…	glyA	GO:0001505,GO:0003674,GO:0003824,GO:0004372,GO:0005488,GO:0005515,GO:0005575,GO:0005618,GO:0005623,GO:0005886,GO:0006082,GO:0006520,GO:0006544,GO:0006563,GO:0006807,GO:0008144,GO:0008150,GO:0008152,GO:0009069,GO:0009605,GO:0009607,GO:0009987,GO:0016020,GO:0016740,GO:0016741,GO:0016742,GO:0017144,GO:0019752,GO:0019842,GO:0020012,GO:0030170,GO:0030312,GO:0030682,GO:0036094,GO:0042133,GO:0042783,GO:…	2.1.2.1	ko:K00600	ko00260,ko00460,ko00630,ko00670,ko00680,ko01100,ko01110,ko01120,ko01130,ko01200,ko01230,ko01523,map00260,map00460,map00630,map00670,map00680,map01100,map01110,map01120,map01130,map01200,map01230,map01523	M00140,M00141,M00346,M00532	R00945,R09099	RC00022,RC00112,RC01583,RC02958	ko00000,ko00001,ko00002,ko01000	-	-	-	SHMT
lcl|NC_009525.1_cds_WP_003405801.1_1156	419947.MRA_1105	5.11e-204	563.0	COG0208@1|root,COG0208@2|Bacteria,2GMRX@201174|Actinobacteria,232UI@1762|Mycobacteriaceae	201174|Actinobacteria	F	PFAM Fatty acid desaturase	desA2	GO:0003674,GO:0005488,GO:0005575,GO:0005618,GO:0005622,GO:0005623,GO:0005737,GO:0005829,GO:0005886,GO:0008150,GO:0016020,GO:0030312,GO:0040007,GO:0043167,GO:0043169,GO:0044424,GO:0044444,GO:0044464,GO:0046872,GO:0071944	1.14.19.2	ko:K03922	ko00061,ko01040,ko01212,map00061,map01040,map01212	-	R03370,R08161	RC00917	ko00000,ko00001,ko01000,ko01004	-	-	-	FA_desaturase_2
lcl|NC_009525.1_cds_WP_003898725.1_1158	419947.MRA_1107	4.58e-215	593.0	COG0726@1|root,COG0726@2|Bacteria,2HEQK@201174|Actinobacteria,2347B@1762|Mycobacteriaceae	201174|Actinobacteria	G	polysaccharide deacetylase	-	-	3.5.1.104	ko:K22278	-	-	-	-	ko00000,ko01000	-	-	-	Polysacc_deac_1
lcl|NC_009525.1_cds_WP_003405805.1_1160	419947.MRA_1109	0.0	902.0	COG0114@1|root,COG0114@2|Bacteria,2GKWY@201174|Actinobacteria,2330K@1762|Mycobacteriaceae	201174|Actinobacteria	C	Involved in the TCA cycle. Catalyzes the stereospecific interconversion of fumarate to L-malate	fumC	GO:0003674,GO:0003824,GO:0004333,GO:0005575,GO:0005576,GO:0005618,GO:0005622,GO:0005623,GO:0005737,GO:0005829,GO:0005886,GO:0006082,GO:0006091,GO:0006099,GO:0006101,GO:0006106,GO:0006108,GO:0008150,GO:0008152,GO:0009060,GO:0009987,GO:0015980,GO:0016020,GO:0016829,GO:0016835,GO:0016836,GO:0016999,GO:0017144,GO:0019752,GO:0030312,GO:0040007,GO:0043436,GO:0043648,GO:0044237,GO:0044238,GO:0044281,GO:…	4.2.1.2	ko:K01679	ko00020,ko00620,ko00720,ko01100,ko01110,ko01120,ko01130,ko01200,ko04934,ko05200,ko05211,map00020,map00620,map00720,map01100,map01110,map01120,map01130,map01200,map04934,map05200,map05211	M00009,M00011,M00173,M00376	R01082	RC00443	ko00000,ko00001,ko00002,ko01000	-	-	-	FumaraseC_C,Lyase_1
lcl|NC_009525.1_cds_WP_003898727.1_1163	419947.MRA_1112	3.44e-262	720.0	COG0628@1|root,COG0628@2|Bacteria,2HT12@201174|Actinobacteria,2337A@1762|Mycobacteriaceae	201174|Actinobacteria	S	AI-2E family transporter	-	GO:0003674,GO:0005215,GO:0005575,GO:0005623,GO:0005886,GO:0005887,GO:0006810,GO:0008150,GO:0016020,GO:0016021,GO:0031224,GO:0031226,GO:0044425,GO:0044459,GO:0044464,GO:0051179,GO:0051234,GO:0055085,GO:0071944	-	-	-	-	-	-	-	-	-	-	AI-2E_transport
lcl|NC_009525.1_cds_WP_003898728.1_1164	419947.MRA_1113	3.38e-66	201.0	COG2337@1|root,COG2337@2|Bacteria,2ISBP@201174|Actinobacteria,23DNC@1762|Mycobacteriaceae	201174|Actinobacteria	T	PemK-like, MazF-like toxin of type II toxin-antitoxin system	mazF3	GO:0003674,GO:0003824,GO:0004518,GO:0004519,GO:0004521,GO:0004540,GO:0006139,GO:0006355,GO:0006401,GO:0006402,GO:0006417,GO:0006725,GO:0006807,GO:0008150,GO:0008152,GO:0009056,GO:0009057,GO:0009889,GO:0009890,GO:0009892,GO:0009987,GO:0010468,GO:0010556,GO:0010558,GO:0010605,GO:0010608,GO:0010629,GO:0016070,GO:0016071,GO:0016072,GO:0016075,GO:0016787,GO:0016788,GO:0017148,GO:0019219,GO:0019222,GO:…	-	ko:K07171	-	-	-	-	ko00000,ko01000,ko02048	-	-	-	PemK_toxin
lcl|NC_009525.1_cds_WP_003898730.1_1170	419947.MRA_1120	1.68e-139	395.0	2EATU@1|root,334VK@2|Bacteria,2IKQC@201174|Actinobacteria,235IG@1762|Mycobacteriaceae	201174|Actinobacteria	-	-	-	GO:0005575,GO:0005618,GO:0005622,GO:0005623,GO:0005737,GO:0005829,GO:0005886,GO:0016020,GO:0030312,GO:0044424,GO:0044444,GO:0044464,GO:0071944	-	-	-	-	-	-	-	-	-	-	-
lcl|NC_009525.1_cds_WP_003898731.1_1172	419947.MRA_1122	2.09e-204	569.0	2FH0D@1|root,348VF@2|Bacteria,2I8QN@201174|Actinobacteria,232E6@1762|Mycobacteriaceae	201174|Actinobacteria	-	-	-	-	-	-	-	-	-	-	-	-	-	-	-
lcl|NC_009525.1_cds_WP_003898732.1_1173	419947.MRA_1123	1.37e-247	681.0	COG0012@1|root,COG0012@2|Bacteria,2GIXI@201174|Actinobacteria,23386@1762|Mycobacteriaceae	201174|Actinobacteria	J	ATPase that binds to both the 70S ribosome and the 50S ribosomal subunit in a nucleotide-independent manner	ychF	-	-	ko:K06942	-	-	-	-	ko00000,ko03009	-	-	-	MMR_HSR1,YchF-GTPase_C
lcl|NC_009525.1_cds_WP_003898733.1_1176	419947.MRA_1125	4.66e-165	461.0	COG0791@1|root,COG0791@2|Bacteria,2IIW8@201174|Actinobacteria,239BP@1762|Mycobacteriaceae	201174|Actinobacteria	M	NLP P60 protein	-	-	-	-	-	-	-	-	-	-	-	-	NLPC_P60
lcl|NC_009525.1_cds_WP_003911400.1_1181	525368.HMPREF0591_5035	1.77e-30	108.0	2CIG4@1|root,33C84@2|Bacteria,2GWMV@201174|Actinobacteria,23B9K@1762|Mycobacteriaceae	201174|Actinobacteria	-	-	-	-	-	-	-	-	-	-	-	-	-	-	-
lcl|NC_009525.1_cds_WP_003898735.1_1183	419947.MRA_1130	0.0	942.0	COG0364@1|root,COG0364@2|Bacteria,2GISI@201174|Actinobacteria,2334D@1762|Mycobacteriaceae	201174|Actinobacteria	G	Catalyzes the oxidation of glucose 6-phosphate to 6- phosphogluconolactone	zwf1	GO:0005575,GO:0005623,GO:0005886,GO:0016020,GO:0044464,GO:0071944	1.1.1.363,1.1.1.49	ko:K00036	ko00030,ko00480,ko01100,ko01110,ko01120,ko01130,ko01200,ko05230,map00030,map00480,map01100,map01110,map01120,map01130,map01200,map05230	M00004,M00006,M00008	R00835,R02736,R10907	RC00001,RC00066	ko00000,ko00001,ko00002,ko01000,ko04147	-	-	-	G6PD_C,G6PD_N
lcl|NC_009525.1_cds_WP_003898736.1_1185	419947.MRA_1132	1.27e-207	574.0	COG0596@1|root,COG0596@2|Bacteria,2I4EY@201174|Actinobacteria,2339R@1762|Mycobacteriaceae	201174|Actinobacteria	S	Alpha beta hydrolase	bpoB	-	-	-	-	-	-	-	-	-	-	-	Abhydrolase_1
lcl|NC_009525.1_cds_WP_003911402.1_1186	419947.MRA_1133	1.47e-231	636.0	COG0596@1|root,COG0596@2|Bacteria,2HMX1@201174|Actinobacteria,232WQ@1762|Mycobacteriaceae	201174|Actinobacteria	S	Alpha beta hydrolase	ephC	-	-	-	-	-	-	-	-	-	-	-	Abhydrolase_1,Abhydrolase_6
lcl|NC_009525.1_cds_WP_003900276.1_1187	419947.MRA_1134	1.06e-298	815.0	COG1020@1|root,COG1020@2|Bacteria,2GMM6@201174|Actinobacteria,232NC@1762|Mycobacteriaceae	201174|Actinobacteria	Q	D-alanine [D-alanyl carrier protein] ligase activity	-	-	-	-	-	-	-	-	-	-	-	-	DUF1298,WES_acyltransf
lcl|NC_009525.1_cds_WP_003906520.1_1189	419947.MRA_1136	0.0	961.0	COG0574@1|root,COG1080@1|root,COG0574@2|Bacteria,COG1080@2|Bacteria,2GK73@201174|Actinobacteria,237B9@1762|Mycobacteriaceae	201174|Actinobacteria	G	pyruvate phosphate dikinase	ppdK	-	2.7.9.1	ko:K01006	ko00620,ko00710,ko00720,ko01100,ko01120,ko01200,map00620,map00710,map00720,map01100,map01120,map01200	M00169,M00171,M00172,M00173	R00206	RC00002,RC00015	ko00000,ko00001,ko00002,ko01000	-	-	-	PEP-utilizers,PPDK_N
lcl|NC_009525.1_cds_WP_003906521.1_1190	419947.MRA_1137	0.0	915.0	COG1403@1|root,COG1403@2|Bacteria,2GU7G@201174|Actinobacteria,232NV@1762|Mycobacteriaceae	201174|Actinobacteria	V	Domain of unknown function (DUF222)	-	GO:0005575,GO:0005618,GO:0005623,GO:0008150,GO:0030312,GO:0040007,GO:0044464,GO:0071944	-	-	-	-	-	-	-	-	-	-	DUF222,HNH
lcl|NC_009525.1_cds_WP_003405907.1_1192	419947.MRA_1139	0.0	1022.0	COG2079@1|root,COG2079@2|Bacteria,2GKUR@201174|Actinobacteria,233B9@1762|Mycobacteriaceae	201174|Actinobacteria	S	MmgE/PrpD family	prpD	GO:0003674,GO:0003824,GO:0005575,GO:0005618,GO:0005622,GO:0005623,GO:0005737,GO:0005829,GO:0006082,GO:0006629,GO:0006631,GO:0008150,GO:0008152,GO:0009056,GO:0009062,GO:0009268,GO:0009628,GO:0009987,GO:0010447,GO:0016042,GO:0016054,GO:0016829,GO:0016835,GO:0016836,GO:0016999,GO:0017001,GO:0017144,GO:0019541,GO:0019543,GO:0019626,GO:0019629,GO:0019679,GO:0019752,GO:0030312,GO:0032787,GO:0042737,GO:…	4.2.1.79	ko:K01720	ko00640,map00640	-	R04424	RC01152	ko00000,ko00001,ko01000	-	-	-	MmgE_PrpD
lcl|NC_009525.1_cds_MRA_RS23150_1199	419947.MRA_1144	4.53e-111	342.0	COG5263@1|root,COG5651@1|root,COG5263@2|Bacteria,COG5651@2|Bacteria,2IF96@201174|Actinobacteria,237PY@1762|Mycobacteriaceae	201174|Actinobacteria	N	PPE family	-	-	-	-	-	-	-	-	-	-	-	-	PPE,Pentapeptide_2
lcl|NC_009525.1_cds_WP_003405922.1_1200	419947.MRA_1145	5.96e-54	168.0	COG0183@1|root,COG0183@2|Bacteria	2|Bacteria	I	Belongs to the thiolase family	fadA6_3	GO:0003674,GO:0003676,GO:0003723,GO:0003729,GO:0003824,GO:0003988,GO:0005488,GO:0005575,GO:0005622,GO:0005623,GO:0005737,GO:0005739,GO:0005740,GO:0005758,GO:0005777,GO:0005782,GO:0006082,GO:0006629,GO:0006631,GO:0006635,GO:0008150,GO:0008152,GO:0009056,GO:0009062,GO:0009987,GO:0016042,GO:0016054,GO:0016408,GO:0016740,GO:0016746,GO:0016747,GO:0019395,GO:0019752,GO:0030258,GO:0031907,GO:0031967,GO:…	2.3.1.16,2.3.1.9	ko:K00626,ko:K00632	ko00071,ko00072,ko00280,ko00281,ko00310,ko00362,ko00380,ko00592,ko00620,ko00630,ko00640,ko00642,ko00650,ko00720,ko00900,ko01100,ko01110,ko01120,ko01130,ko01200,ko01212,ko02020,map00071,map00072,map00280,map00281,map00310,map00362,map00380,map00592,map00620,map00630,map00640,map00642,map00650,map00720,map00900,map01100,map01110,map01120,map01130,map01200,map01212,map02020	M00087,M00088,M00095,M00113,M00373,M00374,M00375	R00238,R00829,R00927,R01177,R03778,R03858,R03991,R04546,R04742,R04747,R05506,R05586,R07891,R07895,R07899,R08091,R08095	RC00004,RC00326,RC00405,RC01702,RC02728,RC02898,RC02955	ko00000,ko00001,ko00002,ko01000,ko04147	-	-	-	Thiolase_C,Thiolase_N
lcl|NC_009525.1_cds_WP_003405932.1_1202	419947.MRA_1148	9.56e-243	667.0	COG0644@1|root,COG0644@2|Bacteria,2GM2M@201174|Actinobacteria,234A4@1762|Mycobacteriaceae	201174|Actinobacteria	C	FAD dependent oxidoreductase	srsC	-	-	-	-	-	-	-	-	-	-	-	FAD_binding_2,FAD_binding_3,FAD_oxidored
lcl|NC_009525.1_cds_WP_003911379.1_1204	419947.MRA_1150	9.73e-165	463.0	COG1266@1|root,COG1266@2|Bacteria,2I925@201174|Actinobacteria,235Y3@1762|Mycobacteriaceae	201174|Actinobacteria	S	Abortive infection protein	-	-	-	ko:K07052	-	-	-	-	ko00000	-	-	-	Abi
lcl|NC_009525.1_cds_WP_003405951.1_1205	419947.MRA_1151	3.89e-175	490.0	COG1024@1|root,COG1024@2|Bacteria,2GJDK@201174|Actinobacteria,2368S@1762|Mycobacteriaceae	201174|Actinobacteria	I	Enoyl-CoA hydratase	echA10	-	4.2.1.17	ko:K01692	ko00071,ko00280,ko00281,ko00310,ko00360,ko00362,ko00380,ko00410,ko00627,ko00640,ko00650,ko00903,ko00930,ko01100,ko01110,ko01120,ko01130,ko01212,map00071,map00280,map00281,map00310,map00360,map00362,map00380,map00410,map00627,map00640,map00650,map00903,map00930,map01100,map01110,map01120,map01130,map01212	M00032,M00087	R03026,R03045,R04137,R04170,R04204,R04224,R04738,R04740,R04744,R04746,R04749,R05595,R06411,R06412,R06942,R08093	RC00831,RC00834,RC01086,RC01095,RC01098,RC01103,RC01217,RC02115	ko00000,ko00001,ko00002,ko01000	-	-	-	ECH_1
lcl|NC_009525.1_cds_WP_003405957.1_1206	419947.MRA_1152	1.54e-181	506.0	COG1024@1|root,COG1024@2|Bacteria,2GJDK@201174|Actinobacteria,2368S@1762|Mycobacteriaceae	201174|Actinobacteria	I	Enoyl-CoA hydratase	echA10	-	4.2.1.17	ko:K01692	ko00071,ko00280,ko00281,ko00310,ko00360,ko00362,ko00380,ko00410,ko00627,ko00640,ko00650,ko00903,ko00930,ko01100,ko01110,ko01120,ko01130,ko01212,map00071,map00280,map00281,map00310,map00360,map00362,map00380,map00410,map00627,map00640,map00650,map00903,map00930,map01100,map01110,map01120,map01130,map01212	M00032,M00087	R03026,R03045,R04137,R04170,R04204,R04224,R04738,R04740,R04744,R04746,R04749,R05595,R06411,R06412,R06942,R08093	RC00831,RC00834,RC01086,RC01095,RC01098,RC01103,RC01217,RC02115	ko00000,ko00001,ko00002,ko01000	-	-	-	ECH_1
lcl|NC_009525.1_cds_WP_003898740.1_1207	419947.MRA_1153	4.56e-268	733.0	COG1804@1|root,COG1804@2|Bacteria,2GKNX@201174|Actinobacteria,234U5@1762|Mycobacteriaceae	201174|Actinobacteria	C	carnitine dehydratase	mcr	-	5.1.99.4	ko:K01796	ko00120,ko01100,ko04146,map00120,map01100,map04146	M00104	R08734,R08739	RC02345	ko00000,ko00001,ko00002,ko01000	-	-	iNJ661.Rv0855	CoA_transf_3
lcl|NC_009525.1_cds_WP_003405961.1_1208	419947.MRA_1154	4.08e-168	471.0	COG1028@1|root,COG1028@2|Bacteria,2GNUM@201174|Actinobacteria,234BS@1762|Mycobacteriaceae	201174|Actinobacteria	IQ	Belongs to the short-chain dehydrogenases reductases (SDR) family	-	GO:0005575,GO:0005618,GO:0005623,GO:0005886,GO:0016020,GO:0030312,GO:0044464,GO:0071944	-	-	-	-	-	-	-	-	-	-	adh_short
lcl|NC_009525.1_cds_WP_003406047.1_1217	419947.MRA_1162	1.37e-78	234.0	COG1725@1|root,COG1725@2|Bacteria,2IQEW@201174|Actinobacteria,239II@1762|Mycobacteriaceae	201174|Actinobacteria	K	transcriptional	-	-	-	-	-	-	-	-	-	-	-	-	GntR
lcl|NC_009525.1_cds_WP_003898744.1_1218	419947.MRA_1163	3.74e-205	567.0	COG3315@1|root,COG3315@2|Bacteria,2GP52@201174|Actinobacteria,232TD@1762|Mycobacteriaceae	201174|Actinobacteria	Q	O-Methyltransferase	omt	-	-	-	-	-	-	-	-	-	-	-	LCM
lcl|NC_009525.1_cds_WP_031682434.1_1219	419947.MRA_1164	1.31e-120	346.0	COG3797@1|root,COG3797@2|Bacteria,2GPDB@201174|Actinobacteria,238PB@1762|Mycobacteriaceae	201174|Actinobacteria	S	Protein of unknown function (DUF1697)	-	-	-	-	-	-	-	-	-	-	-	-	DUF1697
lcl|NC_009525.1_cds_WP_003898745.1_1220	419947.MRA_1165	3.22e-103	298.0	COG3467@1|root,COG3467@2|Bacteria,2IFCX@201174|Actinobacteria,238JV@1762|Mycobacteriaceae	201174|Actinobacteria	S	PFAM pyridoxamine 5'-phosphate	-	GO:0000166,GO:0003674,GO:0005488,GO:0005515,GO:0006766,GO:0006767,GO:0006807,GO:0008144,GO:0008150,GO:0008152,GO:0009987,GO:0010181,GO:0017144,GO:0019842,GO:0030170,GO:0031406,GO:0032553,GO:0034641,GO:0036094,GO:0042802,GO:0042803,GO:0042816,GO:0043167,GO:0043168,GO:0043177,GO:0044237,GO:0044281,GO:0046483,GO:0046983,GO:0048037,GO:0050662,GO:0070279,GO:0070967,GO:0071704,GO:0072524,GO:0097159,GO:…	-	ko:K07005	-	-	-	-	ko00000	-	-	-	Putative_PNPOx
lcl|NC_009525.1_cds_WP_003406066.1_1224	419947.MRA_1167	9.18e-221	614.0	2CDJB@1|root,33SXJ@2|Bacteria,2H6GE@201174|Actinobacteria,234BQ@1762|Mycobacteriaceae	201174|Actinobacteria	-	-	-	-	-	-	-	-	-	-	-	-	-	-	-
lcl|NC_009525.1_cds_WP_003900282.1_1226	419947.MRA_1169	4.64e-313	852.0	COG1051@1|root,COG1051@2|Bacteria,2I2P7@201174|Actinobacteria,23417@1762|Mycobacteriaceae	201174|Actinobacteria	F	GDP-Man:Man3GlcNAc2-PP-Dol alpha-1,2-mannosyltransferase activity	pimE	GO:0000026,GO:0000030,GO:0003674,GO:0003824,GO:0004376,GO:0004377,GO:0006629,GO:0006643,GO:0006664,GO:0008150,GO:0008152,GO:0008610,GO:0009058,GO:0009247,GO:0009987,GO:0016740,GO:0016757,GO:0016758,GO:0043750,GO:0044237,GO:0044238,GO:0044249,GO:0044255,GO:0046467,GO:0070085,GO:0071704,GO:0097502,GO:1901135,GO:1901137,GO:1901576,GO:1903509	-	ko:K13669	-	-	-	-	ko00000,ko01000,ko01003	-	GT87	-	GT87,NUDIX
lcl|NC_009525.1_cds_WP_003898748.1_1229	419947.MRA_1172	0.0	2556.0	COG5013@1|root,COG5013@2|Bacteria,2GKZU@201174|Actinobacteria,233JF@1762|Mycobacteriaceae	201174|Actinobacteria	C	Belongs to the prokaryotic molybdopterin-containing oxidoreductase family	narG	GO:0000302,GO:0001101,GO:0003674,GO:0003824,GO:0005575,GO:0005576,GO:0005618,GO:0005623,GO:0005886,GO:0006082,GO:0006807,GO:0006950,GO:0006979,GO:0008150,GO:0008152,GO:0008940,GO:0009056,GO:0009628,GO:0009987,GO:0010035,GO:0010167,GO:0016020,GO:0016491,GO:0016661,GO:0030312,GO:0033554,GO:0034599,GO:0034614,GO:0034641,GO:0035690,GO:0036293,GO:0036294,GO:0042126,GO:0042128,GO:0042221,GO:0042493,GO:…	1.7.5.1	ko:K00370	ko00910,ko01120,ko02020,map00910,map01120,map02020	M00529,M00530,M00804	R00798,R01106,R09497	RC02812	ko00000,ko00001,ko00002,ko01000	5.A.3.1	-	-	Molybdopterin,Molydop_binding
lcl|NC_009525.1_cds_WP_003406090.1_1230	419947.MRA_1173	0.0	1161.0	COG1140@1|root,COG1140@2|Bacteria,2GJ8P@201174|Actinobacteria,2343B@1762|Mycobacteriaceae	201174|Actinobacteria	C	Nitrate reductase beta subunit	narH	-	1.7.5.1	ko:K00371	ko00910,ko01120,ko02020,map00910,map01120,map02020	M00529,M00530,M00804	R00798,R01106,R09497	RC02812	ko00000,ko00001,ko00002,ko01000	5.A.3.1	-	-	Fer4_11,Nitr_red_bet_C
lcl|NC_009525.1_cds_WP_003406099.1_1233	419947.MRA_1176	0.0	1210.0	COG1217@1|root,COG1217@2|Bacteria,2GJUJ@201174|Actinobacteria,233P2@1762|Mycobacteriaceae	201174|Actinobacteria	T	GTP-binding protein TypA	typA	-	-	ko:K06207	-	-	-	-	ko00000	-	-	-	EFG_C,GTP_EFTU,GTP_EFTU_D2
lcl|NC_009525.1_cds_WP_003406102.1_1234	419947.MRA_1177	0.0	1229.0	COG0747@1|root,COG0747@2|Bacteria,2GJ9N@201174|Actinobacteria,2363A@1762|Mycobacteriaceae	201174|Actinobacteria	E	Monoacyl phosphatidylinositol tetramannoside-binding protein	lpqW	GO:0005575,GO:0005576,GO:0005623,GO:0006629,GO:0006643,GO:0006664,GO:0008150,GO:0008152,GO:0008610,GO:0009058,GO:0009247,GO:0009987,GO:0030288,GO:0030313,GO:0031975,GO:0040007,GO:0042597,GO:0044237,GO:0044238,GO:0044249,GO:0044255,GO:0044464,GO:0046467,GO:0071704,GO:1901135,GO:1901137,GO:1901576,GO:1903509	-	-	-	-	-	-	-	-	-	-	SBP_bac_5
lcl|NC_009525.1_cds_WP_003898751.1_1236	419947.MRA_1179	9.88e-240	660.0	COG5651@1|root,COG5651@2|Bacteria,2I9YQ@201174|Actinobacteria,237WC@1762|Mycobacteriaceae	201174|Actinobacteria	N	Polymorphic PE/PPE proteins C terminal	-	-	-	-	-	-	-	-	-	-	-	-	PE_PPE_C,PPE
lcl|NC_009525.1_cds_WP_003898753.1_1240	419947.MRA_1183	9.99e-198	550.0	COG0657@1|root,COG0657@2|Bacteria	2|Bacteria	I	acetylesterase activity	-	-	3.1.1.3	ko:K01046	ko00561,ko01100,map00561,map01100	M00098	R02250,R02687	RC00020,RC00037,RC00041,RC00094	ko00000,ko00001,ko00002,ko01000	-	-	-	Abhydrolase_3,PE
lcl|NC_009525.1_cds_WP_003406167.1_1241	419947.MRA_1184	0.0	1701.0	COG1060@1|root,COG1060@2|Bacteria,2GK83@201174|Actinobacteria,236ER@1762|Mycobacteriaceae	201174|Actinobacteria	H	catalyzes radical-mediated transfer of hydroxybenzyl group from 4-hydroxyphenylpyruvate (HPP) to 5-amino-6-ribitylamino-2,4(1H,3H)-pyrimidinedione to form 7,8-didemethyl-8-hydroxy-5-deazariboflavin (FO)	fbiC	GO:0003674,GO:0003824,GO:0005575,GO:0005623,GO:0005886,GO:0006732,GO:0006950,GO:0008150,GO:0008152,GO:0009058,GO:0009108,GO:0009987,GO:0016020,GO:0016740,GO:0016765,GO:0044237,GO:0044249,GO:0044464,GO:0044689,GO:0050896,GO:0051186,GO:0051188,GO:0051409,GO:0071944	2.5.1.77	ko:K11779	ko00680,ko01120,map00680,map01120	M00378	R09396	RC01381,RC03002,RC03007	ko00000,ko00001,ko00002,ko01000	-	-	-	Radical_SAM
lcl|NC_009525.1_cds_WP_003911416.1_1243	419947.MRA_1186	0.0	1330.0	COG0446@1|root,COG1902@1|root,COG0446@2|Bacteria,COG1902@2|Bacteria,2GK8E@201174|Actinobacteria,233NX@1762|Mycobacteriaceae	201174|Actinobacteria	C	COG1902 NADH flavin oxidoreductases, Old Yellow Enzyme family	fadH	-	1.3.1.34	ko:K00219	-	-	-	-	ko00000,ko01000	-	-	-	Oxidored_FMN,Pyr_redox_2
lcl|NC_009525.1_cds_WP_003898756.1_1246	419947.MRA_1189	7.16e-257	704.0	COG0436@1|root,COG0436@2|Bacteria,2GJMI@201174|Actinobacteria,2334K@1762|Mycobacteriaceae	201174|Actinobacteria	E	Aminotransferase	dapC	-	-	-	-	-	-	-	-	-	-	-	Aminotran_1_2
lcl|NC_009525.1_cds_WP_003406192.1_1248	419947.MRA_1191	0.0	4063.0	COG0604@1|root,COG1028@1|root,COG3321@1|root,COG0604@2|Bacteria,COG1028@2|Bacteria,COG3321@2|Bacteria,2H477@201174|Actinobacteria,232E7@1762|Mycobacteriaceae	201174|Actinobacteria	Q	polyketide synthase	pks2	GO:0005575,GO:0005622,GO:0005623,GO:0005737,GO:0006082,GO:0006629,GO:0006631,GO:0006633,GO:0008150,GO:0008152,GO:0008610,GO:0009058,GO:0009987,GO:0016053,GO:0019752,GO:0032787,GO:0032991,GO:0034081,GO:0043436,GO:0044237,GO:0044238,GO:0044249,GO:0044255,GO:0044281,GO:0044283,GO:0044424,GO:0044444,GO:0044464,GO:0046394,GO:0071704,GO:0072330,GO:0097089,GO:1901576,GO:1902321	2.3.1.111,2.3.1.252	ko:K11628,ko:K12431,ko:K12432,ko:K12433,ko:K12442,ko:K12443	-	-	R05189,R11450,R11451	RC00039,RC03439	ko00000,ko01000,ko01004	-	-	iNJ661.Rv2934	ADH_N,ADH_zinc_N,ADH_zinc_N_2,Acyl_transf_1,KAsynt_C_assoc,KR,Ketoacyl-synt_C,PP-binding,PS-DH,ketoacyl-synt
lcl|NC_009525.1_cds_WP_003898759.1_1249	419947.MRA_1192	0.0	965.0	COG1020@1|root,COG1020@2|Bacteria,2GSQU@201174|Actinobacteria,232PE@1762|Mycobacteriaceae	201174|Actinobacteria	Q	COG1020 Non-ribosomal peptide synthetase modules and related proteins	papA3	GO:0003674,GO:0003824,GO:0005975,GO:0005984,GO:0005991,GO:0006629,GO:0006643,GO:0006664,GO:0008150,GO:0008152,GO:0008610,GO:0009058,GO:0009247,GO:0009311,GO:0009987,GO:0016409,GO:0016740,GO:0016746,GO:0016747,GO:0040007,GO:0044237,GO:0044238,GO:0044249,GO:0044255,GO:0044262,GO:0046467,GO:0071704,GO:1901135,GO:1901137,GO:1901576,GO:1903509	-	-	-	-	-	-	-	-	-	-	Condensation
lcl|NC_009525.1_cds_WP_256381313.1_1250	419947.MRA_1193	0.0	1826.0	COG2409@1|root,COG2409@2|Bacteria,2GIRQ@201174|Actinobacteria,232DR@1762|Mycobacteriaceae	201174|Actinobacteria	S	transport protein	mmpL10	GO:0005575,GO:0005576,GO:0005618,GO:0005622,GO:0005623,GO:0005737,GO:0005829,GO:0005886,GO:0016020,GO:0030312,GO:0044424,GO:0044444,GO:0044464,GO:0071944	-	ko:K06994	-	-	-	-	ko00000	-	-	-	MMPL
lcl|NC_009525.1_cds_WP_003406195.1_1251	419947.MRA_1194	1.08e-270	739.0	COG5651@1|root,COG5651@2|Bacteria,2GJ85@201174|Actinobacteria,232NF@1762|Mycobacteriaceae	201174|Actinobacteria	N	domain protein	-	GO:0005575,GO:0005618,GO:0005623,GO:0030312,GO:0044464,GO:0071944	-	-	-	-	-	-	-	-	-	-	PE-PPE
lcl|NC_009525.1_cds_WP_003406196.1_1252	419947.MRA_1195	0.0	1162.0	COG0318@1|root,COG0318@2|Bacteria,2I2RH@201174|Actinobacteria,2343A@1762|Mycobacteriaceae	201174|Actinobacteria	IQ	Activates fatty acids by binding to coenzyme A	fadD21	GO:0003674,GO:0003824,GO:0005575,GO:0005623,GO:0005886,GO:0006082,GO:0006629,GO:0006631,GO:0006633,GO:0008150,GO:0008152,GO:0008610,GO:0009058,GO:0009987,GO:0016020,GO:0016053,GO:0016740,GO:0016772,GO:0016779,GO:0019752,GO:0032787,GO:0043436,GO:0044237,GO:0044238,GO:0044249,GO:0044255,GO:0044281,GO:0044283,GO:0044464,GO:0046394,GO:0070566,GO:0071704,GO:0071944,GO:0072330,GO:1901576	2.7.7.95,6.2.1.51	ko:K00666,ko:K12423,ko:K12425,ko:K12426,ko:K12427,ko:K12428,ko:K21059	-	-	R11537,R11538,R11922,R11923,R11924,R11925	RC00043	ko00000,ko01000,ko01004	-	-	iNJ661.Rv3801c	AMP-binding
lcl|NC_009525.1_cds_WP_003916779.1_1253	419947.MRA_1196	0.0	1028.0	COG2508@1|root,COG2508@2|Bacteria,2GJWJ@201174|Actinobacteria,233JM@1762|Mycobacteriaceae	201174|Actinobacteria	QT	PucR C-terminal helix-turn-helix domain	-	-	-	-	-	-	-	-	-	-	-	-	HTH_30
lcl|NC_009525.1_cds_WP_003900286.1_1254	419947.MRA_1197	0.0	1083.0	COG1012@1|root,COG1012@2|Bacteria,2GJZE@201174|Actinobacteria,235IZ@1762|Mycobacteriaceae	201174|Actinobacteria	C	Dehydrogenase	pruA	-	1.2.1.88	ko:K00294	ko00250,ko00330,ko01100,map00250,map00330,map01100	-	R00245,R00707,R00708,R04444,R04445,R05051	RC00080,RC00216,RC00242,RC00255	ko00000,ko00001,ko01000	-	-	-	Aldedh
lcl|NC_009525.1_cds_WP_003406207.1_1256	419947.MRA_1199	3.45e-205	568.0	COG1595@1|root,COG1595@2|Bacteria,2GJIZ@201174|Actinobacteria,236KX@1762|Mycobacteriaceae	201174|Actinobacteria	K	Belongs to the sigma-70 factor family. ECF subfamily	sigI	-	-	ko:K03088	-	-	-	-	ko00000,ko03021	-	-	-	Sigma70_r2,Sigma70_r4_2
lcl|NC_009525.1_cds_WP_003898763.1_1259	419947.MRA_1202	9.58e-209	575.0	COG1075@1|root,COG1075@2|Bacteria,2GJGC@201174|Actinobacteria,234C6@1762|Mycobacteriaceae	201174|Actinobacteria	S	acetyltransferases and hydrolases with the alpha beta hydrolase fold	-	-	-	-	-	-	-	-	-	-	-	-	Abhydrolase_1
lcl|NC_009525.1_cds_WP_003406219.1_1261	419947.MRA_1204	3.46e-303	827.0	COG2508@1|root,COG2508@2|Bacteria,2GN7Z@201174|Actinobacteria,235DE@1762|Mycobacteriaceae	201174|Actinobacteria	QT	transcriptional	-	-	-	-	-	-	-	-	-	-	-	-	HTH_30
lcl|NC_009525.1_cds_MRA_RS06365_1263	419947.MRA_1205A	8.93e-212	588.0	COG5651@1|root,COG5651@2|Bacteria,2IEW3@201174|Actinobacteria,237E4@1762|Mycobacteriaceae	201174|Actinobacteria	N	PPE family	-	-	-	-	-	-	-	-	-	-	-	-	PE_PPE_C,PPE
lcl|NC_009525.1_cds_WP_003904572.1_1266	419947.MRA_1208	6.1e-294	803.0	COG3328@1|root,COG3328@2|Bacteria,2GM8F@201174|Actinobacteria,234FU@1762|Mycobacteriaceae	201174|Actinobacteria	L	Transposase, mutator	-	-	-	ko:K07493	-	-	-	-	ko00000	-	-	-	Transposase_mut
lcl|NC_009525.1_cds_WP_003406233.1_1267	419947.MRA_1209	3.13e-292	799.0	COG0477@1|root,COG0477@2|Bacteria,2GIYR@201174|Actinobacteria,232GC@1762|Mycobacteriaceae	201174|Actinobacteria	EGP	Major facilitator superfamily	-	-	-	-	-	-	-	-	-	-	-	iNJ661.Rv1200	Sugar_tr
lcl|NC_009525.1_cds_WP_223713600.1_1270	419947.MRA_1212	5.45e-122	349.0	COG2909@1|root,COG2909@2|Bacteria,2GM03@201174|Actinobacteria,232BK@1762|Mycobacteriaceae	201174|Actinobacteria	K	luxR family	-	-	-	-	-	-	-	-	-	-	-	-	AAA_16,AAA_22,AAA_30,GerE
lcl|NC_009525.1_cds_WP_003898770.1_1272	419947.MRA_1214	1.61e-136	385.0	COG1611@1|root,COG1611@2|Bacteria,2GMM1@201174|Actinobacteria,235UE@1762|Mycobacteriaceae	201174|Actinobacteria	S	Cytokinin riboside 5'-monophosphate phosphoribohydrolase	-	GO:0003674,GO:0003824,GO:0006725,GO:0006807,GO:0008150,GO:0008152,GO:0009058,GO:0009308,GO:0009690,GO:0009691,GO:0009987,GO:0010817,GO:0016787,GO:0016798,GO:0016799,GO:0034754,GO:0042445,GO:0042446,GO:0044237,GO:0044249,GO:0046483,GO:0065007,GO:0065008,GO:0071704,GO:1901564	3.2.2.10	ko:K06966	ko00230,ko00240,map00230,map00240	-	R00182,R00510	RC00063,RC00318	ko00000,ko00001,ko01000	-	-	-	Lysine_decarbox
lcl|NC_009525.1_cds_WP_003406244.1_1277	419947.MRA_1219	2.26e-149	419.0	COG2818@1|root,COG2818@2|Bacteria,2IFH0@201174|Actinobacteria,235TK@1762|Mycobacteriaceae	201174|Actinobacteria	L	DNA-3-methyladenine glycosylase I	tag	-	3.2.2.20	ko:K01246	ko03410,map03410	-	-	-	ko00000,ko00001,ko01000,ko03400	-	-	-	Adenine_glyco
lcl|NC_009525.1_cds_WP_003898773.1_1279	419947.MRA_1221	5.91e-280	765.0	COG0297@1|root,COG0297@2|Bacteria,2I2EE@201174|Actinobacteria,232KZ@1762|Mycobacteriaceae	201174|Actinobacteria	G	Glycogen synthase	glgA	GO:0000271,GO:0003674,GO:0003824,GO:0005975,GO:0005976,GO:0006073,GO:0008150,GO:0008152,GO:0009058,GO:0009059,GO:0009250,GO:0009987,GO:0016051,GO:0016740,GO:0016757,GO:0033692,GO:0034637,GO:0034645,GO:0043170,GO:0044042,GO:0044237,GO:0044238,GO:0044249,GO:0044260,GO:0044262,GO:0044264,GO:0071704,GO:1901576	2.4.1.342	ko:K16148	ko00500,ko01100,map00500,map01100	-	R02421,R11530	RC00005,RC00049,RC02748	ko00000,ko00001,ko01000,ko01003	-	GT4	-	Glyco_transf_4,Glycos_transf_1
lcl|NC_009525.1_cds_WP_003406249.1_1280	419947.MRA_1222	1.32e-271	745.0	COG0448@1|root,COG0448@2|Bacteria,2I2EF@201174|Actinobacteria,23450@1762|Mycobacteriaceae	201174|Actinobacteria	H	Catalyzes the synthesis of ADP-glucose, a sugar donor used in elongation reactions on alpha-glucans	glgC	GO:0000271,GO:0005575,GO:0005622,GO:0005623,GO:0005737,GO:0005829,GO:0005975,GO:0005976,GO:0006073,GO:0008150,GO:0008152,GO:0009058,GO:0009059,GO:0009250,GO:0009987,GO:0016051,GO:0033692,GO:0034637,GO:0034645,GO:0043170,GO:0044042,GO:0044237,GO:0044238,GO:0044249,GO:0044260,GO:0044262,GO:0044264,GO:0044424,GO:0044444,GO:0044464,GO:0071704,GO:1901576	2.7.7.27	ko:K00975	ko00500,ko00520,ko01100,ko01110,ko02026,map00500,map00520,map01100,map01110,map02026	M00565	R00948	RC00002	ko00000,ko00001,ko00002,ko01000	-	-	-	Hexapep,NTP_transferase
lcl|NC_009525.1_cds_WP_003898774.1_1282	419947.MRA_1224	0.0	1165.0	COG2936@1|root,COG2936@2|Bacteria,2GKZH@201174|Actinobacteria,235XG@1762|Mycobacteriaceae	201174|Actinobacteria	S	X-Pro dipeptidyl-peptidase C-terminal non-catalytic domain	-	-	-	ko:K06978	-	-	-	-	ko00000	-	-	-	PepX_C,Peptidase_S15
lcl|NC_009525.1_cds_WP_003406252.1_1283	419947.MRA_1225	1.24e-156	439.0	COG2020@1|root,COG2020@2|Bacteria,2I4HM@201174|Actinobacteria,23314@1762|Mycobacteriaceae	201174|Actinobacteria	O	PFAM Isoprenylcysteine carboxyl methyltransferase	-	-	-	-	-	-	-	-	-	-	-	-	ICMT,PEMT
lcl|NC_009525.1_cds_WP_003898775.1_1284	419947.MRA_1226	0.0	1018.0	COG3559@1|root,COG3559@2|Bacteria,2GMSI@201174|Actinobacteria,233W7@1762|Mycobacteriaceae	201174|Actinobacteria	M	ABC transporter	-	-	-	ko:K01992	-	M00254	-	-	ko00000,ko00002,ko02000	3.A.1	-	-	-
lcl|NC_009525.1_cds_WP_003906541.1_1285	419947.MRA_1227	1.42e-219	606.0	COG1131@1|root,COG1131@2|Bacteria,2GKEH@201174|Actinobacteria,23350@1762|Mycobacteriaceae	201174|Actinobacteria	V	ABC transporter	-	-	-	ko:K01990	-	M00254	-	-	ko00000,ko00002,ko02000	3.A.1	-	-	ABC_tran,DUF4162
lcl|NC_009525.1_cds_WP_003406254.1_1286	419947.MRA_1228	9.83e-148	416.0	COG1309@1|root,COG1309@2|Bacteria,2HD07@201174|Actinobacteria,235H1@1762|Mycobacteriaceae	201174|Actinobacteria	K	Transcriptional regulator	-	-	-	-	-	-	-	-	-	-	-	-	TetR_N
lcl|NC_009525.1_cds_WP_003911448.1_1287	419947.MRA_1229	8.12e-144	407.0	COG4122@1|root,COG4122@2|Bacteria,2GPEV@201174|Actinobacteria,232T5@1762|Mycobacteriaceae	201174|Actinobacteria	S	O-Methyltransferase	-	GO:0005575,GO:0005618,GO:0005623,GO:0005886,GO:0016020,GO:0030312,GO:0044464,GO:0071944	-	-	-	-	-	-	-	-	-	-	Methyltransf_24,Methyltransf_3
lcl|NC_009525.1_cds_WP_003911452.1_1290	419947.MRA_1232	0.0	956.0	COG0265@1|root,COG0265@2|Bacteria,2GJ96@201174|Actinobacteria,234JY@1762|Mycobacteriaceae	201174|Actinobacteria	O	serine protease	htrA	GO:0000785,GO:0001101,GO:0003674,GO:0003824,GO:0004175,GO:0004252,GO:0005488,GO:0005515,GO:0005575,GO:0005622,GO:0005623,GO:0005634,GO:0005694,GO:0005737,GO:0005739,GO:0005740,GO:0005758,GO:0005783,GO:0005789,GO:0005829,GO:0005856,GO:0005886,GO:0005887,GO:0006508,GO:0006807,GO:0006915,GO:0006950,GO:0006974,GO:0006979,GO:0007154,GO:0007165,GO:0008150,GO:0008152,GO:0008219,GO:0008233,GO:0008236,GO:…	-	ko:K08372	ko02020,map02020	-	-	-	ko00000,ko00001,ko01000,ko01002	-	-	-	PDZ_2,Trypsin_2
lcl|NC_009525.1_cds_WP_003898780.1_1291	419947.MRA_1233	1.49e-89	262.0	COG1826@1|root,COG1826@2|Bacteria,2IR0U@201174|Actinobacteria,2398J@1762|Mycobacteriaceae	201174|Actinobacteria	U	Part of the twin-arginine translocation (Tat) system that transports large folded proteins containing a characteristic twin-arginine motif in their signal peptide across membranes. Together with TatC, TatB is part of a receptor directly interacting with Tat signal peptides. TatB may form an oligomeric binding site that transiently accommodates folded Tat precursor proteins before their translocat…	tatB	GO:0008150,GO:0040007	-	ko:K03117	ko03060,ko03070,map03060,map03070	M00336	-	-	ko00000,ko00001,ko00002,ko02044	2.A.64	-	-	MttA_Hcf106
lcl|NC_009525.1_cds_WP_003898781.1_1293	419947.MRA_1235	0.0	931.0	COG3428@1|root,COG3428@2|Bacteria,2GJCD@201174|Actinobacteria,233RK@1762|Mycobacteriaceae	201174|Actinobacteria	S	Bacterial PH domain	-	-	-	ko:K08981	-	-	-	-	ko00000	-	-	-	bPH_2
lcl|NC_009525.1_cds_WP_003916796.1_1298	419947.MRA_1239	1.63e-280	768.0	COG2951@1|root,COG2951@2|Bacteria,2GX49@201174|Actinobacteria,23544@1762|Mycobacteriaceae	201174|Actinobacteria	M	Transglycosylase SLT domain	-	-	-	-	-	-	-	-	-	-	-	-	SLT_2
lcl|NC_009525.1_cds_WP_009935769.1_1300	419947.MRA_1241	1.91e-259	717.0	COG2239@1|root,COG2239@2|Bacteria,2GMMK@201174|Actinobacteria,233X8@1762|Mycobacteriaceae	201174|Actinobacteria	P	CBS domain	mgtE	-	-	-	-	-	-	-	-	-	-	-	CBS,MgtE_N,PRC
lcl|NC_009525.1_cds_WP_003900298.1_1305	419947.MRA_1246	1.22e-181	507.0	COG0395@1|root,COG0395@2|Bacteria,2GKEE@201174|Actinobacteria,2346G@1762|Mycobacteriaceae	201174|Actinobacteria	P	inner membrane component	sugB	GO:0008150,GO:0040007,GO:0044110,GO:0044116,GO:0044117,GO:0044403,GO:0044419,GO:0051704	-	ko:K02026	-	M00207	-	-	ko00000,ko00002,ko02000	3.A.1.1	-	-	BPD_transp_1
lcl|NC_009525.1_cds_WP_003916789.1_1307	419947.MRA_1248	6.51e-271	740.0	COG0598@1|root,COG0598@2|Bacteria,2GKNZ@201174|Actinobacteria,235WH@1762|Mycobacteriaceae	201174|Actinobacteria	P	Mediates influx of magnesium ions	corA	-	-	ko:K03284	-	-	-	-	ko00000,ko02000	1.A.35.1,1.A.35.3	-	-	CorA
lcl|NC_009525.1_cds_WP_003406301.1_1308	419947.MRA_1249	2.38e-227	627.0	COG0039@1|root,COG0039@2|Bacteria,2GJHS@201174|Actinobacteria,2349F@1762|Mycobacteriaceae	201174|Actinobacteria	C	Catalyzes the reversible oxidation of malate to oxaloacetate	mdh	GO:0003674,GO:0003824,GO:0005575,GO:0005618,GO:0005622,GO:0005623,GO:0005737,GO:0005829,GO:0005886,GO:0005975,GO:0006082,GO:0006091,GO:0006099,GO:0006101,GO:0006107,GO:0006108,GO:0006139,GO:0006725,GO:0006732,GO:0006733,GO:0006734,GO:0006753,GO:0006793,GO:0006796,GO:0006807,GO:0008150,GO:0008152,GO:0009060,GO:0009117,GO:0009987,GO:0015980,GO:0016020,GO:0016491,GO:0016614,GO:0016615,GO:0016616,GO:…	1.1.1.37	ko:K00024	ko00020,ko00270,ko00620,ko00630,ko00680,ko00710,ko00720,ko01100,ko01110,ko01120,ko01130,ko01200,map00020,map00270,map00620,map00630,map00680,map00710,map00720,map01100,map01110,map01120,map01130,map01200	M00009,M00011,M00012,M00168,M00173,M00346,M00374,M00620,M00740	R00342,R07136	RC00031	ko00000,ko00001,ko00002,ko01000	-	-	-	Ldh_1_C,Ldh_1_N
lcl|NC_009525.1_cds_WP_003910308.1_1311	419947.MRA_1252	2.18e-94	306.0	COG3391@1|root,COG3391@2|Bacteria,2H3EE@201174|Actinobacteria,23CD0@1762|Mycobacteriaceae	201174|Actinobacteria	S	PE family	-	-	-	-	-	-	-	-	-	-	-	-	PE
lcl|NC_009525.1_cds_WP_003900301.1_1312	419947.MRA_1253	1.68e-194	540.0	COG1732@1|root,COG1732@2|Bacteria,2HNID@201174|Actinobacteria,234U9@1762|Mycobacteriaceae	201174|Actinobacteria	M	ABC-type glycine betaine transport system	lpqZ	-	-	ko:K02002	ko02010,map02010	M00208	-	-	ko00000,ko00001,ko00002,ko02000	3.A.1.12	-	-	OpuAC
lcl|NC_009525.1_cds_WP_003898788.1_1313	419947.MRA_1254	2.05e-190	529.0	COG4221@1|root,COG4221@2|Bacteria,2GN3I@201174|Actinobacteria,232YA@1762|Mycobacteriaceae	201174|Actinobacteria	S	Belongs to the short-chain dehydrogenases reductases (SDR) family	-	GO:0000166,GO:0003674,GO:0003824,GO:0004303,GO:0005488,GO:0005496,GO:0005575,GO:0005622,GO:0005623,GO:0005737,GO:0005829,GO:0006629,GO:0006694,GO:0006703,GO:0008150,GO:0008152,GO:0008202,GO:0008210,GO:0008289,GO:0008610,GO:0009058,GO:0009987,GO:0010817,GO:0016229,GO:0016491,GO:0016614,GO:0016616,GO:0033764,GO:0034754,GO:0036094,GO:0042445,GO:0042446,GO:0042562,GO:0043167,GO:0043168,GO:0044237,GO:…	-	-	-	-	-	-	-	-	-	-	adh_short
lcl|NC_009525.1_cds_WP_003898789.1_1314	419947.MRA_1255	4.39e-66	200.0	COG2026@1|root,COG2026@2|Bacteria,2GRQR@201174|Actinobacteria,23BHI@1762|Mycobacteriaceae	201174|Actinobacteria	K	ParE toxin of type II toxin-antitoxin system, parDE	relE	GO:0003674,GO:0003824,GO:0004518,GO:0004519,GO:0006139,GO:0006401,GO:0006725,GO:0006807,GO:0008150,GO:0008152,GO:0009056,GO:0009057,GO:0009987,GO:0016070,GO:0016787,GO:0016788,GO:0019439,GO:0034641,GO:0034655,GO:0040008,GO:0043170,GO:0044237,GO:0044238,GO:0044248,GO:0044260,GO:0044265,GO:0044270,GO:0045926,GO:0046483,GO:0046700,GO:0048519,GO:0050789,GO:0065007,GO:0071704,GO:0090304,GO:0090305,GO:…	-	-	-	-	-	-	-	-	-	-	ParE_toxin
lcl|NC_009525.1_cds_WP_003406322.1_1315	419947.MRA_1255A	4.82e-55	172.0	COG2161@1|root,COG2161@2|Bacteria,2GV08@201174|Actinobacteria,23AP6@1762|Mycobacteriaceae	201174|Actinobacteria	K	antitoxin component of a	relB	GO:0003674,GO:0005488,GO:0005515,GO:0008150,GO:0040008,GO:0045927,GO:0048518,GO:0050789,GO:0065007,GO:0097351	-	ko:K19159	-	-	-	-	ko00000,ko02048	-	-	-	PhdYeFM_antitox
lcl|NC_009525.1_cds_WP_003898790.1_1316	83332.Rv1248c	0.0	2375.0	COG0508@1|root,COG0567@1|root,COG0508@2|Bacteria,COG0567@2|Bacteria,2GIU6@201174|Actinobacteria,23538@1762|Mycobacteriaceae	201174|Actinobacteria	C	Shows three enzymatic activities that share a first common step, the attack of thiamine-PP on 2-oxoglutarate (alpha- ketoglutarate, KG), leading to the formation of an enamine- thiamine-PP intermediate upon decarboxylation. Thus, displays KGD activity, catalyzing the decarboxylation from five-carbon 2- oxoglutarate to four-carbon succinate semialdehyde (SSA). Also catalyzes C-C bond formation bet…	kgd	GO:0000287,GO:0003674,GO:0003824,GO:0005488,GO:0005575,GO:0005618,GO:0005622,GO:0005623,GO:0005737,GO:0005829,GO:0005886,GO:0006082,GO:0006091,GO:0006099,GO:0006101,GO:0006103,GO:0008150,GO:0008152,GO:0008683,GO:0009055,GO:0009060,GO:0009987,GO:0015980,GO:0016020,GO:0016491,GO:0016740,GO:0016744,GO:0016829,GO:0016830,GO:0016831,GO:0016999,GO:0017144,GO:0019752,GO:0022900,GO:0030312,GO:0032991,GO:…	1.2.4.2,4.1.1.71	ko:K00164,ko:K01616	ko00020,ko00310,ko00380,ko01100,ko01110,ko01120,ko01130,ko01200,map00020,map00310,map00380,map01100,map01110,map01120,map01130,map01200	M00009,M00011,M00032	R00621,R01933,R01940,R03316,R08549	RC00004,RC00027,RC00627,RC02743,RC02833,RC02883	br01601,ko00000,ko00001,ko00002,ko01000	-	-	iNJ661.Rv1248c	2-oxoacid_dh,2-oxogl_dehyd_N,E1_dh,OxoGdeHyase_C,Transket_pyr
lcl|NC_009525.1_cds_WP_003898791.1_1318	419947.MRA_1258	0.0	1123.0	COG0477@1|root,COG0477@2|Bacteria,2GIUM@201174|Actinobacteria,2367F@1762|Mycobacteriaceae	201174|Actinobacteria	EGP	Major facilitator superfamily	emrB	GO:0005575,GO:0005623,GO:0005886,GO:0016020,GO:0044464,GO:0071944	-	-	-	-	-	-	-	-	-	-	MFS_1
lcl|NC_009525.1_cds_WP_003406332.1_1319	419947.MRA_1259	0.0	2253.0	COG1112@1|root,COG2251@1|root,COG1112@2|Bacteria,COG2251@2|Bacteria,2GMX8@201174|Actinobacteria,235G4@1762|Mycobacteriaceae	201174|Actinobacteria	L	nuclease	-	-	-	-	-	-	-	-	-	-	-	-	AAA_12,AAA_30,RNase_H_2
lcl|NC_009525.1_cds_WP_003898793.1_1321	419947.MRA_1261	0.0	1067.0	COG0513@1|root,COG0513@2|Bacteria,2GIUR@201174|Actinobacteria,233HA@1762|Mycobacteriaceae	201174|Actinobacteria	JKL	DEAD-box RNA helicase involved in various cellular processes at low temperature, including ribosome biogenesis, mRNA degradation and translation initiation	deaD	GO:0003674,GO:0003724,GO:0003824,GO:0004004,GO:0004386,GO:0005575,GO:0005618,GO:0005622,GO:0005623,GO:0005737,GO:0005829,GO:0006139,GO:0006725,GO:0006807,GO:0008026,GO:0008150,GO:0008152,GO:0008186,GO:0009987,GO:0010501,GO:0016070,GO:0016462,GO:0016787,GO:0016817,GO:0016818,GO:0016887,GO:0017111,GO:0030312,GO:0034641,GO:0042623,GO:0043170,GO:0044237,GO:0044238,GO:0044424,GO:0044444,GO:0044464,GO:…	3.6.4.13	ko:K05592,ko:K11927	ko03018,map03018	-	-	-	ko00000,ko00001,ko01000,ko03009,ko03019	-	-	-	DEAD,DbpA,Helicase_C
lcl|NC_009525.1_cds_WP_003406347.1_1322	419947.MRA_1262	1.55e-273	748.0	COG1835@1|root,COG1835@2|Bacteria,2GP6W@201174|Actinobacteria,236K0@1762|Mycobacteriaceae	201174|Actinobacteria	I	Acyltransferase	-	-	-	-	-	-	-	-	-	-	-	-	Acyl_transf_3
lcl|NC_009525.1_cds_WP_003406358.1_1325	419947.MRA_1265	0.0	877.0	COG0277@1|root,COG0277@2|Bacteria,2GJ2T@201174|Actinobacteria,232YC@1762|Mycobacteriaceae	201174|Actinobacteria	C	FAD linked	-	-	1.1.2.4,1.1.3.15	ko:K00102,ko:K00104	ko00620,ko00630,ko01100,ko01110,ko01120,ko01130,map00620,map00630,map01100,map01110,map01120,map01130	-	R00197,R00475	RC00042,RC00044	ko00000,ko00001,ko01000	-	-	-	FAD-oxidase_C,FAD_binding_4
lcl|NC_009525.1_cds_WP_003911466.1_1327	419947.MRA_1267	3.09e-188	525.0	COG1573@1|root,COG1573@2|Bacteria,2GK1I@201174|Actinobacteria,233MM@1762|Mycobacteriaceae	201174|Actinobacteria	L	Uracil-DNA glycosylase	udgB	GO:0003674,GO:0003824,GO:0004844,GO:0005488,GO:0006139,GO:0006259,GO:0006281,GO:0006284,GO:0006725,GO:0006807,GO:0006950,GO:0006974,GO:0008150,GO:0008152,GO:0009987,GO:0016787,GO:0016798,GO:0016799,GO:0019104,GO:0033554,GO:0033958,GO:0034641,GO:0043170,GO:0044237,GO:0044238,GO:0044260,GO:0046483,GO:0048037,GO:0050896,GO:0051536,GO:0051540,GO:0051716,GO:0071704,GO:0090304,GO:0097506,GO:0140097,GO:…	3.2.2.27	ko:K21929	ko03410,map03410	-	-	-	ko00000,ko00001,ko01000,ko03400	-	-	-	UDG
lcl|NC_009525.1_cds_WP_003406361.1_1328	419947.MRA_1268	6.83e-276	753.0	COG0654@1|root,COG0654@2|Bacteria,2GJ9V@201174|Actinobacteria,235AE@1762|Mycobacteriaceae	201174|Actinobacteria	CH	oxidoreductase	-	-	-	-	-	-	-	-	-	-	-	-	FAD_binding_3
lcl|NC_009525.1_cds_WP_003898798.1_1330	419947.MRA_1270	5.61e-98	285.0	COG0537@1|root,COG0537@2|Bacteria,2IHPT@201174|Actinobacteria,238N8@1762|Mycobacteriaceae	201174|Actinobacteria	FG	Hit family	-	-	-	-	-	-	-	-	-	-	-	-	HIT
lcl|NC_009525.1_cds_WP_003406369.1_1331	419947.MRA_1271	0.0	897.0	COG0154@1|root,COG0154@2|Bacteria,2GKPZ@201174|Actinobacteria,2369H@1762|Mycobacteriaceae	201174|Actinobacteria	J	Belongs to the amidase family	amiB2	-	3.5.1.4	ko:K01426	ko00330,ko00360,ko00380,ko00627,ko00643,ko01120,map00330,map00360,map00380,map00627,map00643,map01120	-	R02540,R03096,R03180,R03909,R05551,R05590	RC00010,RC00100,RC00950,RC01025	ko00000,ko00001,ko01000	-	-	iNJ661.Rv2363	Amidase
lcl|NC_009525.1_cds_WP_003406372.1_1332	419947.MRA_1272	1.51e-278	762.0	COG2114@1|root,COG2114@2|Bacteria,2GN02@201174|Actinobacteria,23294@1762|Mycobacteriaceae	201174|Actinobacteria	T	Adenylate cyclase	-	GO:0003674,GO:0003824,GO:0004016,GO:0005488,GO:0005515,GO:0005575,GO:0005623,GO:0005886,GO:0007154,GO:0007165,GO:0008150,GO:0009268,GO:0009628,GO:0009975,GO:0009987,GO:0010851,GO:0010854,GO:0010855,GO:0016020,GO:0016829,GO:0016849,GO:0023052,GO:0030145,GO:0030234,GO:0031279,GO:0042802,GO:0042803,GO:0043167,GO:0043169,GO:0044464,GO:0046872,GO:0046914,GO:0046983,GO:0050789,GO:0050790,GO:0050794,GO:…	4.6.1.1	ko:K01768	ko00230,ko02025,ko04113,ko04213,map00230,map02025,map04113,map04213	M00695	R00089,R00434	RC00295	ko00000,ko00001,ko00002,ko01000	-	-	iNJ661.Rv1264	Ad_Cy_reg,Guanylate_cyc
lcl|NC_009525.1_cds_WP_003898799.1_1334	419947.MRA_1274	0.0	1196.0	COG0515@1|root,COG0515@2|Bacteria,2GNXG@201174|Actinobacteria,23296@1762|Mycobacteriaceae	201174|Actinobacteria	KLT	serine threonine protein kinase	pknH	GO:0003674,GO:0003824,GO:0004672,GO:0004674,GO:0005575,GO:0005618,GO:0005623,GO:0005886,GO:0005887,GO:0006355,GO:0006464,GO:0006468,GO:0006793,GO:0006796,GO:0006807,GO:0008150,GO:0008152,GO:0009605,GO:0009607,GO:0009889,GO:0009891,GO:0009893,GO:0009987,GO:0010468,GO:0010556,GO:0010557,GO:0010604,GO:0010628,GO:0016020,GO:0016021,GO:0016301,GO:0016310,GO:0016740,GO:0016772,GO:0016773,GO:0019216,GO:…	2.7.11.1	ko:K08884,ko:K12132	-	-	-	-	ko00000,ko01000,ko01001	-	-	-	Pkinase,PknH_C
lcl|NC_009525.1_cds_WP_003406553.1_1335	419947.MRA_1275	1.35e-281	769.0	COG1716@1|root,COG3629@1|root,COG1716@2|Bacteria,COG3629@2|Bacteria,2GKKQ@201174|Actinobacteria,233XG@1762|Mycobacteriaceae	201174|Actinobacteria	K	involved in transcriptional mechanism. thought to regulate the biosynthesis of the mycobacterial cell wall arabinan and resistance to ethambutol (Emb	embR	GO:0003674,GO:0003676,GO:0003677,GO:0003824,GO:0003924,GO:0005488,GO:0005575,GO:0005618,GO:0005623,GO:0005886,GO:0006355,GO:0008150,GO:0009889,GO:0010468,GO:0010556,GO:0016020,GO:0016462,GO:0016787,GO:0016817,GO:0016818,GO:0016887,GO:0017111,GO:0019219,GO:0019222,GO:0030312,GO:0031323,GO:0031326,GO:0044464,GO:0050789,GO:0050794,GO:0051171,GO:0051252,GO:0060255,GO:0065007,GO:0071944,GO:0080090,GO:…	-	-	-	-	-	-	-	-	-	-	AAA_16,BTAD,FHA,Trans_reg_C
lcl|NC_009525.1_cds_WP_003898800.1_1336	419947.MRA_1276	2.48e-160	449.0	COG3271@1|root,COG3271@2|Bacteria,2IB5B@201174|Actinobacteria,234JN@1762|Mycobacteriaceae	201174|Actinobacteria	-	-	-	-	-	-	-	-	-	-	-	-	-	-	Peptidase_C39_2
lcl|NC_009525.1_cds_WP_003406569.1_1340	419947.MRA_1280	0.0	1176.0	COG1132@1|root,COG1132@2|Bacteria,2GITR@201174|Actinobacteria,235Z4@1762|Mycobacteriaceae	201174|Actinobacteria	V	ABC transporter	yfiC	-	-	ko:K06147	-	-	-	-	ko00000,ko02000	3.A.1.106,3.A.1.109,3.A.1.21	-	-	ABC_membrane,ABC_tran
lcl|NC_009525.1_cds_WP_003406574.1_1341	419947.MRA_1281	0.0	1090.0	COG1132@1|root,COG1132@2|Bacteria,2GITR@201174|Actinobacteria,2349E@1762|Mycobacteriaceae	201174|Actinobacteria	V	ABC transporter	-	GO:0005575,GO:0005618,GO:0005623,GO:0030312,GO:0044464,GO:0071944	-	ko:K06147	-	-	-	-	ko00000,ko02000	3.A.1.106,3.A.1.109,3.A.1.21	-	-	ABC_membrane,ABC_tran
lcl|NC_009525.1_cds_WP_003901123.1_1342	419947.MRA_1282	6.33e-133	376.0	COG1188@1|root,COG1188@2|Bacteria,2H7A9@201174|Actinobacteria,232TW@1762|Mycobacteriaceae	201174|Actinobacteria	J	Protein of unknown function (DUF3558)	lprB	GO:0008150,GO:0040007	-	-	-	-	-	-	-	-	-	-	DUF3558
lcl|NC_009525.1_cds_WP_003900308.1_1343	419947.MRA_1283	3.68e-125	356.0	COG1188@1|root,COG1188@2|Bacteria,2IA90@201174|Actinobacteria,233JT@1762|Mycobacteriaceae	201174|Actinobacteria	J	Protein of unknown function (DUF3558)	lprC	-	-	-	-	-	-	-	-	-	-	-	DUF3558
lcl|NC_009525.1_cds_WP_003911418.1_1345	419947.MRA_1285	5.82e-275	753.0	COG0420@1|root,COG0420@2|Bacteria,2HH9X@201174|Actinobacteria,233AC@1762|Mycobacteriaceae	201174|Actinobacteria	L	DNA repair exonuclease	sbcD	-	-	-	-	-	-	-	-	-	-	-	Metallophos
lcl|NC_009525.1_cds_WP_003898806.1_1346	419947.MRA_1286	0.0	1551.0	COG0419@1|root,COG0419@2|Bacteria,2HU66@201174|Actinobacteria,234HZ@1762|Mycobacteriaceae	201174|Actinobacteria	L	AAA domain	-	GO:0005575,GO:0005618,GO:0005623,GO:0005886,GO:0008150,GO:0016020,GO:0030312,GO:0040007,GO:0044464,GO:0071944	-	-	-	-	-	-	-	-	-	-	AAA_15,AAA_23,AAA_27
lcl|NC_009525.1_cds_WP_003900310.1_1348	419947.MRA_1288	0.0	1170.0	COG0747@1|root,COG0747@2|Bacteria,2GJ9N@201174|Actinobacteria,233EQ@1762|Mycobacteriaceae	201174|Actinobacteria	E	extracellular solute-binding	oppA	GO:0003674,GO:0005215,GO:0005488,GO:0005575,GO:0005623,GO:0005886,GO:0005887,GO:0006810,GO:0008104,GO:0008150,GO:0015031,GO:0015833,GO:0016020,GO:0016021,GO:0017038,GO:0022857,GO:0030288,GO:0030313,GO:0031224,GO:0031226,GO:0031975,GO:0033036,GO:0033218,GO:0042277,GO:0042597,GO:0042886,GO:0042887,GO:0043167,GO:0043168,GO:0043295,GO:0044425,GO:0044459,GO:0044464,GO:0045184,GO:0048037,GO:0051179,GO:…	-	ko:K02035	ko02024,map02024	M00239	-	-	ko00000,ko00001,ko00002,ko02000	3.A.1.5	-	-	SBP_bac_5
lcl|NC_009525.1_cds_WP_003406602.1_1349	419947.MRA_1289	0.0	1163.0	COG1123@1|root,COG4172@2|Bacteria,2H3HY@201174|Actinobacteria,23340@1762|Mycobacteriaceae	201174|Actinobacteria	P	Belongs to the ABC transporter superfamily	oppD	GO:0005575,GO:0005618,GO:0005623,GO:0005886,GO:0016020,GO:0030312,GO:0044464,GO:0071944	-	ko:K02031,ko:K02032	ko02024,map02024	M00239	-	-	ko00000,ko00001,ko00002,ko02000	3.A.1.5	-	-	ABC_tran,oligo_HPY
lcl|NC_009525.1_cds_WP_003406607.1_1350	419947.MRA_1290	7.72e-198	549.0	COG1173@1|root,COG1173@2|Bacteria,2GJ9E@201174|Actinobacteria,235CB@1762|Mycobacteriaceae	201174|Actinobacteria	EP	transport	oppC	GO:0005575,GO:0005623,GO:0005886,GO:0016020,GO:0044464,GO:0071944	-	ko:K02034	ko02024,map02024	M00239	-	-	ko00000,ko00001,ko00002,ko02000	3.A.1.5	-	-	BPD_transp_1,OppC_N
lcl|NC_009525.1_cds_WP_003406613.1_1351	419947.MRA_1291	6.81e-225	620.0	COG0601@1|root,COG0601@2|Bacteria,2GJ2C@201174|Actinobacteria,232X5@1762|Mycobacteriaceae	201174|Actinobacteria	EP	transport	oppB	GO:0003674,GO:0005215,GO:0005575,GO:0005623,GO:0005886,GO:0006810,GO:0008150,GO:0016020,GO:0022857,GO:0044464,GO:0051179,GO:0051234,GO:0055085,GO:0071944	-	ko:K02033	ko02024,map02024	M00239	-	-	ko00000,ko00001,ko00002,ko02000	3.A.1.5	-	-	BPD_transp_1
lcl|NC_009525.1_cds_WP_003406621.1_1354	419947.MRA_1294	0.0	1218.0	COG0529@1|root,COG2895@1|root,COG0529@2|Bacteria,COG2895@2|Bacteria,2GJDX@201174|Actinobacteria,232JD@1762|Mycobacteriaceae	201174|Actinobacteria	P	Belongs to the TRAFAC class translation factor GTPase superfamily. Classic translation factor GTPase family. CysN NodQ subfamily	cysN	GO:0000103,GO:0003674,GO:0003824,GO:0004020,GO:0005575,GO:0005622,GO:0005623,GO:0005737,GO:0005829,GO:0005886,GO:0006790,GO:0006793,GO:0006796,GO:0006950,GO:0006979,GO:0007154,GO:0008150,GO:0008152,GO:0009267,GO:0009336,GO:0009605,GO:0009987,GO:0009991,GO:0010134,GO:0010438,GO:0016020,GO:0016301,GO:0016310,GO:0016740,GO:0016772,GO:0016773,GO:0019419,GO:0031667,GO:0031668,GO:0031669,GO:0032991,GO:…	2.7.1.25,2.7.7.4	ko:K00955,ko:K00956	ko00230,ko00261,ko00450,ko00920,ko01100,ko01120,ko01130,map00230,map00261,map00450,map00920,map01100,map01120,map01130	M00176,M00596	R00509,R00529,R04928,R04929	RC00002,RC00078,RC02809,RC02889	ko00000,ko00001,ko00002,ko01000	-	-	-	APS_kinase,GTP_EFTU
lcl|NC_009525.1_cds_WP_003406627.1_1358	419947.MRA_1298	0.0	995.0	COG4325@1|root,COG4325@2|Bacteria,2GWFP@201174|Actinobacteria,2387T@1762|Mycobacteriaceae	201174|Actinobacteria	S	Predicted membrane protein (DUF2254)	-	GO:0005575,GO:0005622,GO:0005623,GO:0005737,GO:0005829,GO:0008150,GO:0009405,GO:0044419,GO:0044424,GO:0044444,GO:0044464,GO:0051704	-	-	-	-	-	-	-	-	-	-	DUF2254
lcl|NC_009525.1_cds_WP_003406630.1_1361	419947.MRA_1300	0.0	1084.0	COG0018@1|root,COG0018@2|Bacteria,2GKQ3@201174|Actinobacteria,2341V@1762|Mycobacteriaceae	201174|Actinobacteria	J	Arginyl-tRNA synthetase	argS	GO:0003674,GO:0003824,GO:0004812,GO:0004814,GO:0005575,GO:0005622,GO:0005623,GO:0005737,GO:0005829,GO:0005886,GO:0006082,GO:0006139,GO:0006399,GO:0006412,GO:0006418,GO:0006420,GO:0006518,GO:0006520,GO:0006725,GO:0006807,GO:0008150,GO:0008152,GO:0009058,GO:0009059,GO:0009987,GO:0010467,GO:0016020,GO:0016070,GO:0016874,GO:0016875,GO:0019538,GO:0019752,GO:0034641,GO:0034645,GO:0034660,GO:0040007,GO:…	6.1.1.19	ko:K01887	ko00970,map00970	M00359,M00360	R03646	RC00055,RC00523	ko00000,ko00001,ko00002,ko01000,ko01007,ko03016,ko03029	-	-	-	Arg_tRNA_synt_N,DALR_1,tRNA-synt_1d
lcl|NC_009525.1_cds_WP_003898814.1_1366	419947.MRA_1305	0.0	1120.0	COG1158@1|root,COG1158@2|Bacteria,2GIWY@201174|Actinobacteria,2333A@1762|Mycobacteriaceae	201174|Actinobacteria	K	Facilitates transcription termination by a mechanism that involves Rho binding to the nascent RNA, activation of Rho's RNA-dependent ATPase activity, and release of the mRNA from the DNA template	rho	GO:0005575,GO:0005618,GO:0005623,GO:0005886,GO:0006139,GO:0006351,GO:0006353,GO:0006360,GO:0006363,GO:0006725,GO:0006807,GO:0008150,GO:0008152,GO:0009058,GO:0009059,GO:0009987,GO:0010467,GO:0016020,GO:0016070,GO:0018130,GO:0019438,GO:0030312,GO:0032774,GO:0034641,GO:0034645,GO:0034654,GO:0040007,GO:0043170,GO:0044237,GO:0044238,GO:0044249,GO:0044260,GO:0044271,GO:0044464,GO:0046483,GO:0071704,GO:…	-	ko:K03628	ko03018,map03018	-	-	-	ko00000,ko00001,ko03019,ko03021	-	-	-	ATP-synt_ab,Rho_N,Rho_RNA_bind
lcl|NC_009525.1_cds_WP_003911420.1_1369	419947.MRA_1308	1.45e-235	647.0	COG2890@1|root,COG2890@2|Bacteria,2GMH1@201174|Actinobacteria,235T2@1762|Mycobacteriaceae	201174|Actinobacteria	J	Methylates the class 1 translation termination release factors RF1 PrfA and RF2 PrfB on the glutamine residue of the universally conserved GGQ motif	prmC	GO:0003674,GO:0003824,GO:0005575,GO:0005622,GO:0005623,GO:0005737,GO:0005829,GO:0008150,GO:0008152,GO:0008168,GO:0008757,GO:0016740,GO:0016741,GO:0032259,GO:0040007,GO:0044424,GO:0044444,GO:0044464	2.1.1.297	ko:K02493	-	-	R10806	RC00003,RC03279	ko00000,ko01000,ko03012	-	-	-	MTS,Methyltransf_31
lcl|NC_009525.1_cds_WP_003898815.1_1370	419947.MRA_1309	1.98e-154	433.0	COG0009@1|root,COG0009@2|Bacteria,2GK2X@201174|Actinobacteria,23383@1762|Mycobacteriaceae	201174|Actinobacteria	J	Belongs to the SUA5 family	ywlC	GO:0000049,GO:0002949,GO:0003674,GO:0003676,GO:0003723,GO:0003824,GO:0005488,GO:0005575,GO:0005622,GO:0005623,GO:0005737,GO:0006139,GO:0006396,GO:0006399,GO:0006400,GO:0006450,GO:0006725,GO:0006807,GO:0008033,GO:0008150,GO:0008152,GO:0009451,GO:0009987,GO:0010467,GO:0016070,GO:0016740,GO:0016772,GO:0016779,GO:0034470,GO:0034641,GO:0034660,GO:0040007,GO:0043170,GO:0043412,GO:0044237,GO:0044238,GO:…	2.7.7.87	ko:K07566	-	-	R10463	RC00745	ko00000,ko01000,ko03009,ko03016	-	-	-	Sua5_yciO_yrdC
lcl|NC_009525.1_cds_WP_003898816.1_1371	419947.MRA_1310	2.71e-280	767.0	COG0472@1|root,COG0472@2|Bacteria,2GIT7@201174|Actinobacteria,233ZR@1762|Mycobacteriaceae	201174|Actinobacteria	M	PFAM Glycosyl transferase family 4	rfe	GO:0000287,GO:0003674,GO:0003824,GO:0005488,GO:0005575,GO:0005623,GO:0005886,GO:0008150,GO:0008152,GO:0009058,GO:0009059,GO:0009987,GO:0016020,GO:0016043,GO:0016740,GO:0016772,GO:0016780,GO:0030145,GO:0034645,GO:0042546,GO:0043167,GO:0043169,GO:0043170,GO:0044036,GO:0044038,GO:0044085,GO:0044237,GO:0044249,GO:0044260,GO:0044464,GO:0045229,GO:0046872,GO:0046914,GO:0070589,GO:0071554,GO:0071555,GO:…	2.7.8.33,2.7.8.35	ko:K02851	-	-	R08856	RC00002	ko00000,ko01000,ko01003,ko01005	-	-	-	Glycos_transf_4
lcl|NC_009525.1_cds_WP_003898818.1_1375	419947.MRA_1314	9.73e-103	299.0	COG0711@1|root,COG0711@2|Bacteria,2GJS4@201174|Actinobacteria,238GJ@1762|Mycobacteriaceae	201174|Actinobacteria	C	Component of the F(0) channel, it forms part of the peripheral stalk, linking F(1) to F(0)	atpF	GO:0005575,GO:0005618,GO:0005623,GO:0005886,GO:0005887,GO:0008150,GO:0016020,GO:0016021,GO:0030312,GO:0031224,GO:0031226,GO:0040007,GO:0044425,GO:0044459,GO:0044464,GO:0071944	-	ko:K02109	ko00190,ko00195,ko01100,map00190,map00195,map01100	M00157	-	-	ko00000,ko00001,ko00002,ko00194	3.A.2.1	-	iNJ661.Rv1306	ATP-synt_B
lcl|NC_009525.1_cds_WP_003898819.1_1378	419947.MRA_1317	2.42e-208	577.0	COG0224@1|root,COG0224@2|Bacteria,2GJ7Q@201174|Actinobacteria,2345C@1762|Mycobacteriaceae	201174|Actinobacteria	C	Produces ATP from ADP in the presence of a proton gradient across the membrane. The gamma chain is believed to be important in regulating ATPase activity and the flow of protons through the CF(0) complex	atpG	GO:0005575,GO:0005618,GO:0005623,GO:0005886,GO:0008150,GO:0016020,GO:0030312,GO:0040007,GO:0044464,GO:0071944	-	ko:K02115	ko00190,ko00195,ko01100,map00190,map00195,map01100	M00157	-	-	ko00000,ko00001,ko00002,ko00194	3.A.2.1	-	-	ATP-synt
lcl|NC_009525.1_cds_WP_003900758.1_1382	419947.MRA_1321	0.0	905.0	COG3464@1|root,COG3464@2|Bacteria,2GJK7@201174|Actinobacteria,23814@1762|Mycobacteriaceae	201174|Actinobacteria	L	Transposase	-	-	-	ko:K07485	-	-	-	-	ko00000	-	-	-	DDE_Tnp_ISL3,HTH_Tnp_ISL3,zf-ISL3
lcl|NC_009525.1_cds_WP_003406857.1_1385	419947.MRA_1324	4.96e-118	337.0	COG0350@1|root,COG0350@2|Bacteria,2IHXW@201174|Actinobacteria,238JK@1762|Mycobacteriaceae	201174|Actinobacteria	L	Involved in the cellular defense against the biological effects of O6-methylguanine (O6-MeG) and O4-methylthymine (O4-MeT) in DNA. Repairs the methylated nucleobase in DNA by stoichiometrically transferring the methyl group to a cysteine residue in the enzyme. This is a suicide reaction the enzyme is irreversibly inactivated	ogt	GO:0003674,GO:0003824,GO:0003908,GO:0005575,GO:0005623,GO:0005886,GO:0006139,GO:0006259,GO:0006281,GO:0006304,GO:0006307,GO:0006725,GO:0006807,GO:0006950,GO:0006974,GO:0008150,GO:0008152,GO:0008168,GO:0008172,GO:0009987,GO:0016020,GO:0016740,GO:0016741,GO:0032259,GO:0033554,GO:0034641,GO:0035510,GO:0043170,GO:0043412,GO:0044237,GO:0044238,GO:0044260,GO:0044464,GO:0046483,GO:0050896,GO:0051409,GO:…	2.1.1.63	ko:K00567	-	-	-	-	ko00000,ko01000,ko03400	-	-	-	DNA_binding_1,Methyltransf_1N
lcl|NC_009525.1_cds_WP_003900313.1_1386	419947.MRA_1325	0.0	993.0	COG0122@1|root,COG2169@1|root,COG0122@2|Bacteria,COG2169@2|Bacteria,2GITG@201174|Actinobacteria,232RT@1762|Mycobacteriaceae	201174|Actinobacteria	K	involved in damage reversal and in base excision repair. the methylated Ada protein acts as a positive regulator of its own synthesis, as well as that of other proteins. the transcription-activating function of the Ada protein resides in its N-terminus. repair of alkylated guanine in DNA by stoichiometrically transferring the alkyl group at the O-6 position to a cysteine residue in the enzyme. th…	alkA	GO:0003674,GO:0003676,GO:0003677,GO:0003684,GO:0003824,GO:0003905,GO:0005488,GO:0005575,GO:0005618,GO:0005622,GO:0005623,GO:0005737,GO:0005886,GO:0006139,GO:0006259,GO:0006281,GO:0006284,GO:0006285,GO:0006304,GO:0006307,GO:0006725,GO:0006807,GO:0006950,GO:0006974,GO:0008150,GO:0008152,GO:0008725,GO:0009987,GO:0016020,GO:0016787,GO:0016798,GO:0016799,GO:0019104,GO:0030312,GO:0032131,GO:0032991,GO:…	3.2.2.21	ko:K13529	ko03410,map03410	-	-	-	ko00000,ko00001,ko01000,ko03000,ko03400	-	-	-	Ada_Zn_binding,AlkA_N,HTH_18,HhH-GPD
lcl|NC_009525.1_cds_WP_003406864.1_1387	419947.MRA_1326	0.0	994.0	COG2114@1|root,COG3850@1|root,COG2114@2|Bacteria,COG3850@2|Bacteria,2GJRI@201174|Actinobacteria,232JH@1762|Mycobacteriaceae	201174|Actinobacteria	T	Thought to play a role in regulation of cellular metabolism by catalysing the synthesis of a second messenger, camp catalytic activity ATP 3',5'-cyclic AMP pyrophosphate	-	GO:0003674,GO:0003824,GO:0004016,GO:0005575,GO:0005622,GO:0005623,GO:0005737,GO:0005829,GO:0006139,GO:0006163,GO:0006164,GO:0006171,GO:0006725,GO:0006753,GO:0006793,GO:0006796,GO:0006807,GO:0008150,GO:0008152,GO:0009058,GO:0009117,GO:0009150,GO:0009152,GO:0009165,GO:0009187,GO:0009190,GO:0009259,GO:0009260,GO:0009975,GO:0009987,GO:0016829,GO:0016849,GO:0018130,GO:0019438,GO:0019637,GO:0019693,GO:…	4.6.1.1	ko:K01768	ko00230,ko02025,ko04113,ko04213,map00230,map02025,map04113,map04213	M00695	R00089,R00434	RC00295	ko00000,ko00001,ko00002,ko01000	-	-	iNJ661.Rv1319c	Guanylate_cyc,HAMP
lcl|NC_009525.1_cds_WP_003406867.1_1388	419947.MRA_1327	0.0	1020.0	COG2114@1|root,COG2972@1|root,COG2114@2|Bacteria,COG2972@2|Bacteria,2GJRI@201174|Actinobacteria,232JH@1762|Mycobacteriaceae	201174|Actinobacteria	T	Thought to play a role in regulation of cellular metabolism by catalysing the synthesis of a second messenger, camp catalytic activity ATP 3',5'-cyclic AMP pyrophosphate	-	GO:0003674,GO:0003824,GO:0004016,GO:0005575,GO:0005576,GO:0006139,GO:0006163,GO:0006164,GO:0006171,GO:0006725,GO:0006753,GO:0006793,GO:0006796,GO:0006807,GO:0008150,GO:0008152,GO:0009058,GO:0009117,GO:0009150,GO:0009152,GO:0009165,GO:0009187,GO:0009190,GO:0009259,GO:0009260,GO:0009975,GO:0009987,GO:0016829,GO:0016849,GO:0018130,GO:0019438,GO:0019637,GO:0019693,GO:0034641,GO:0034654,GO:0044237,GO:…	4.6.1.1	ko:K01768	ko00230,ko02025,ko04113,ko04213,map00230,map02025,map04113,map04213	M00695	R00089,R00434	RC00295	ko00000,ko00001,ko00002,ko01000	-	-	iNJ661.Rv1319c	Guanylate_cyc,HAMP
lcl|NC_009525.1_cds_WP_009935613.1_1389	419947.MRA_1328	0.0	1097.0	COG2114@1|root,COG2972@1|root,COG2114@2|Bacteria,COG2972@2|Bacteria,2H40C@201174|Actinobacteria,23D2C@1762|Mycobacteriaceae	201174|Actinobacteria	T	HAMP domain	-	GO:0003674,GO:0003824,GO:0004016,GO:0005575,GO:0005618,GO:0005622,GO:0005623,GO:0005737,GO:0005829,GO:0005886,GO:0009975,GO:0016020,GO:0016829,GO:0016849,GO:0030312,GO:0044424,GO:0044444,GO:0044464,GO:0071944	4.6.1.1	ko:K01768	ko00230,ko02025,ko04113,ko04213,map00230,map02025,map04113,map04213	M00695	R00089,R00434	RC00295	ko00000,ko00001,ko00002,ko01000	-	-	-	Guanylate_cyc,HAMP
lcl|NC_009525.1_cds_WP_003916802.1_1390	419947.MRA_1329	6.86e-161	450.0	COG1637@1|root,COG1637@2|Bacteria,2GIYB@201174|Actinobacteria,2338U@1762|Mycobacteriaceae	201174|Actinobacteria	L	Cleaves both 3' and 5' ssDNA extremities of branched DNA structures	nucS	-	-	ko:K07503	-	-	-	-	ko00000,ko01000	-	-	-	NucS
lcl|NC_009525.1_cds_WP_023637385.1_1393	419947.MRA_1331	1.32e-269	739.0	COG0183@1|root,COG0183@2|Bacteria,2GJAC@201174|Actinobacteria,232VA@1762|Mycobacteriaceae	201174|Actinobacteria	I	Catalyzes the synthesis of acetoacetyl coenzyme A from two molecules of acetyl coenzyme A. It can also act as a thiolase, catalyzing the reverse reaction and generating two-carbon units from the four-carbon product of fatty acid oxidation	fadA4	GO:0003674,GO:0003824,GO:0003988,GO:0005575,GO:0005576,GO:0005623,GO:0005886,GO:0006082,GO:0006629,GO:0006631,GO:0006635,GO:0008150,GO:0008152,GO:0009056,GO:0009062,GO:0009605,GO:0009607,GO:0009987,GO:0016020,GO:0016042,GO:0016054,GO:0016408,GO:0016740,GO:0016746,GO:0016747,GO:0019395,GO:0019752,GO:0030258,GO:0032787,GO:0034440,GO:0043207,GO:0043436,GO:0044237,GO:0044238,GO:0044242,GO:0044248,GO:…	2.3.1.9	ko:K00626	ko00071,ko00072,ko00280,ko00310,ko00362,ko00380,ko00620,ko00630,ko00640,ko00650,ko00720,ko00900,ko01100,ko01110,ko01120,ko01130,ko01200,ko01212,ko02020,map00071,map00072,map00280,map00310,map00362,map00380,map00620,map00630,map00640,map00650,map00720,map00900,map01100,map01110,map01120,map01130,map01200,map01212,map02020	M00088,M00095,M00373,M00374,M00375	R00238,R01177	RC00004,RC00326	ko00000,ko00001,ko00002,ko01000,ko04147	-	-	-	Thiolase_C,Thiolase_N
lcl|NC_009525.1_cds_WP_010886112.1_1395	419947.MRA_1333	5.19e-65	231.0	COG0657@1|root,COG0657@2|Bacteria,2I6YE@201174|Actinobacteria,23423@1762|Mycobacteriaceae	201174|Actinobacteria	I	PE-PGRS family	-	-	-	-	-	-	-	-	-	-	-	-	PE
lcl|NC_009525.1_cds_WP_003900318.1_1396	419947.MRA_1334	0.0	1554.0	COG0296@1|root,COG0296@2|Bacteria,2GJ5C@201174|Actinobacteria,234A0@1762|Mycobacteriaceae	201174|Actinobacteria	G	Catalyzes the formation of the alpha-1,6-glucosidic linkages in glycogen by scission of a 1,4-alpha-linked oligosaccharide from growing alpha-1,4-glucan chains and the subsequent attachment of the oligosaccharide to the alpha-1,6 position	glgB	GO:0000271,GO:0003674,GO:0003824,GO:0003844,GO:0005575,GO:0005623,GO:0005886,GO:0005975,GO:0005976,GO:0005977,GO:0005978,GO:0006073,GO:0006091,GO:0006112,GO:0008150,GO:0008152,GO:0009058,GO:0009059,GO:0009250,GO:0009987,GO:0015980,GO:0016020,GO:0016051,GO:0016740,GO:0016757,GO:0016758,GO:0033692,GO:0034637,GO:0034645,GO:0040007,GO:0043170,GO:0044042,GO:0044237,GO:0044238,GO:0044249,GO:0044260,GO:…	2.4.1.18	ko:K00700	ko00500,ko01100,ko01110,map00500,map01100,map01110	M00565	R02110	-	ko00000,ko00001,ko00002,ko01000,ko04147	-	CBM48,GH13	-	Alpha-amylase,Alpha-amylase_C,CBM_48
lcl|NC_009525.1_cds_WP_003901135.1_1398	419947.MRA_1336	0.0	1749.0	COG0058@1|root,COG0058@2|Bacteria,2GIVZ@201174|Actinobacteria,23392@1762|Mycobacteriaceae	201174|Actinobacteria	G	phosphorylase	glgP	GO:0005575,GO:0005622,GO:0005623,GO:0005737,GO:0005829,GO:0005886,GO:0016020,GO:0044424,GO:0044444,GO:0044464,GO:0071944	2.4.1.1	ko:K00688	ko00500,ko01100,ko01110,ko02026,ko04217,ko04910,ko04922,ko04931,map00500,map01100,map01110,map02026,map04217,map04910,map04922,map04931	-	R02111	-	ko00000,ko00001,ko01000	-	GT35	-	DUF3417,Phosphorylase
lcl|NC_009525.1_cds_WP_003898827.1_1399	419947.MRA_1337	0.0	1179.0	COG1199@1|root,COG1199@2|Bacteria,2GKT8@201174|Actinobacteria,235N7@1762|Mycobacteriaceae	201174|Actinobacteria	KL	helicase	dinG	GO:0005575,GO:0005623,GO:0005886,GO:0016020,GO:0044464,GO:0071944	3.6.4.12	ko:K03722	-	-	-	-	ko00000,ko01000,ko03400	-	-	-	DEAD,Helicase_C_2
lcl|NC_009525.1_cds_WP_003911483.1_1400	419947.MRA_1338	5.87e-311	848.0	COG1488@1|root,COG1488@2|Bacteria,2GJAT@201174|Actinobacteria,232CP@1762|Mycobacteriaceae	201174|Actinobacteria	H	Catalyzes the synthesis of beta-nicotinate D- ribonucleotide from nicotinate and 5-phospho-D-ribose 1-phosphate at the expense of ATP	pncB	GO:0003674,GO:0003824,GO:0004516,GO:0005575,GO:0005618,GO:0005623,GO:0006139,GO:0006725,GO:0006732,GO:0006733,GO:0006753,GO:0006793,GO:0006796,GO:0006807,GO:0008150,GO:0008152,GO:0009058,GO:0009108,GO:0009117,GO:0009165,GO:0009435,GO:0009987,GO:0016740,GO:0016757,GO:0016763,GO:0016874,GO:0016879,GO:0018130,GO:0019359,GO:0019362,GO:0019363,GO:0019365,GO:0019438,GO:0019637,GO:0019674,GO:0030312,GO:…	6.3.4.21	ko:K00763	ko00760,ko01100,map00760,map01100	-	R01724	RC00033	ko00000,ko00001,ko01000	-	-	-	NAPRTase,QRPTase_C
lcl|NC_009525.1_cds_WP_003406908.1_1403	419947.MRA_1341	1.2e-239	659.0	COG3191@1|root,COG3191@2|Bacteria,2GJKQ@201174|Actinobacteria,2353J@1762|Mycobacteriaceae	201174|Actinobacteria	EQ	peptidase S58, DmpA	dmpA	-	-	ko:K18572	ko00332,ko01130,map00332,map01130	-	R10752	RC00090,RC00096	ko00000,ko00001,ko01000	-	-	-	Peptidase_S58
lcl|NC_009525.1_cds_WP_003406912.1_1406	419947.MRA_1344	6.9e-233	640.0	COG0031@1|root,COG0031@2|Bacteria,2GIXE@201174|Actinobacteria,234PQ@1762|Mycobacteriaceae	201174|Actinobacteria	E	cysteine	cysM	GO:0000096,GO:0000097,GO:0003674,GO:0003824,GO:0005488,GO:0005575,GO:0005622,GO:0005623,GO:0005737,GO:0005829,GO:0006082,GO:0006520,GO:0006534,GO:0006535,GO:0006563,GO:0006790,GO:0006807,GO:0008144,GO:0008150,GO:0008152,GO:0008652,GO:0009058,GO:0009069,GO:0009070,GO:0009987,GO:0016053,GO:0016740,GO:0016765,GO:0019344,GO:0019752,GO:0019842,GO:0030170,GO:0032991,GO:0033847,GO:0036094,GO:0043167,GO:…	2.5.1.113	ko:K21148	ko04122,map04122	-	R10610	RC03225	ko00000,ko00001,ko01000	-	-	-	PALP
lcl|NC_009525.1_cds_WP_003898831.1_1407	419947.MRA_1345	2.69e-168	470.0	COG0705@1|root,COG0705@2|Bacteria,2HCGE@201174|Actinobacteria,2358W@1762|Mycobacteriaceae	201174|Actinobacteria	S	membrane	-	-	-	-	-	-	-	-	-	-	-	-	Rhomboid
lcl|NC_009525.1_cds_WP_003898833.1_1413	419947.MRA_1351	3.05e-91	266.0	COG1566@1|root,COG1566@2|Bacteria,2ISAW@201174|Actinobacteria,23A14@1762|Mycobacteriaceae	201174|Actinobacteria	V	Glucitol operon activator	lprD	-	-	-	-	-	-	-	-	-	-	-	-
lcl|NC_009525.1_cds_WP_003406950.1_1415	419947.MRA_1353	0.0	1017.0	COG0318@1|root,COG0318@2|Bacteria,2GKSP@201174|Actinobacteria,23494@1762|Mycobacteriaceae	201174|Actinobacteria	IQ	Converts medium- to long-chain aliphatic fatty acids into acyl adenylate	mbtM	GO:0000166,GO:0003674,GO:0003824,GO:0005488,GO:0005524,GO:0005575,GO:0005623,GO:0005886,GO:0006082,GO:0006629,GO:0006631,GO:0006633,GO:0008144,GO:0008150,GO:0008152,GO:0008610,GO:0008922,GO:0009058,GO:0009987,GO:0015645,GO:0016020,GO:0016053,GO:0016740,GO:0016772,GO:0016779,GO:0016874,GO:0016877,GO:0016878,GO:0017076,GO:0019752,GO:0030554,GO:0032553,GO:0032555,GO:0032559,GO:0032787,GO:0035639,GO:…	6.2.1.20	ko:K00666,ko:K01909	ko00071,map00071	-	R01406	RC00014,RC00039	ko00000,ko00001,ko01000,ko01004	-	-	-	AMP-binding,AMP-binding_C,AMP-binding_C_2
lcl|NC_009525.1_cds_WP_003406958.1_1418	419947.MRA_1356	0.0	1661.0	COG1132@1|root,COG2375@1|root,COG1132@2|Bacteria,COG2375@2|Bacteria,2GITR@201174|Actinobacteria,235U0@1762|Mycobacteriaceae	201174|Actinobacteria	PV	ABC transporter	irtA	GO:0000041,GO:0000166,GO:0003674,GO:0005215,GO:0005488,GO:0005575,GO:0005623,GO:0005886,GO:0006810,GO:0006811,GO:0006812,GO:0006826,GO:0006873,GO:0006875,GO:0006879,GO:0006950,GO:0007154,GO:0008150,GO:0009267,GO:0009405,GO:0009605,GO:0009607,GO:0009987,GO:0009991,GO:0010106,GO:0015343,GO:0015682,GO:0015688,GO:0015891,GO:0016020,GO:0019725,GO:0022857,GO:0030001,GO:0030003,GO:0031667,GO:0031668,GO:…	-	ko:K06147,ko:K14698	ko02010,map02010	-	-	-	ko00000,ko00001,ko01000,ko02000	3.A.1.106,3.A.1.109,3.A.1.21,3.A.1.21.2	-	-	ABC_membrane,ABC_tran,FAD_binding_9,SIP
lcl|NC_009525.1_cds_WP_003900322.1_1419	419947.MRA_1357	0.0	1077.0	COG1132@1|root,COG1132@2|Bacteria,2GNK3@201174|Actinobacteria,233QC@1762|Mycobacteriaceae	201174|Actinobacteria	V	ABC transporter	irtB	GO:0000041,GO:0003674,GO:0005215,GO:0005575,GO:0005622,GO:0005623,GO:0005737,GO:0005829,GO:0005886,GO:0006810,GO:0006811,GO:0006812,GO:0006826,GO:0006873,GO:0006875,GO:0006879,GO:0006950,GO:0007154,GO:0008150,GO:0009267,GO:0009405,GO:0009605,GO:0009607,GO:0009987,GO:0009991,GO:0010106,GO:0015343,GO:0015682,GO:0015688,GO:0015891,GO:0016020,GO:0019725,GO:0022857,GO:0030001,GO:0030003,GO:0031667,GO:…	-	ko:K14699	ko02010,map02010	-	-	-	ko00000,ko00001,ko01000,ko02000	3.A.1.21.2	-	iNJ661.Rv1349	ABC_membrane,ABC_tran
lcl|NC_009525.1_cds_WP_003406963.1_1421	419947.MRA_1358	1.93e-160	451.0	COG1028@1|root,COG1028@2|Bacteria,2GIX2@201174|Actinobacteria,23414@1762|Mycobacteriaceae	201174|Actinobacteria	IQ	reductase	fabG_1	GO:0008150,GO:0040007	1.1.1.100	ko:K00059	ko00061,ko00333,ko00780,ko01040,ko01100,ko01130,ko01212,map00061,map00333,map00780,map01040,map01100,map01130,map01212	M00083,M00572	R04533,R04534,R04536,R04543,R04566,R04953,R04964,R07759,R07763,R10116,R10120,R11671	RC00029,RC00117	ko00000,ko00001,ko00002,ko01000,ko01004	-	-	-	adh_short_C2
lcl|NC_009525.1_cds_WP_003898836.1_1424	419947.MRA_1361	2.21e-182	508.0	COG1309@1|root,COG1309@2|Bacteria,2IEQ5@201174|Actinobacteria,232Y3@1762|Mycobacteriaceae	201174|Actinobacteria	K	Transcriptional regulator	-	GO:0000976,GO:0001067,GO:0003674,GO:0003676,GO:0003677,GO:0003690,GO:0003700,GO:0005488,GO:0005575,GO:0005622,GO:0005623,GO:0005737,GO:0005829,GO:0006355,GO:0008150,GO:0009889,GO:0010468,GO:0010556,GO:0019219,GO:0019222,GO:0031323,GO:0031326,GO:0043565,GO:0044212,GO:0044424,GO:0044444,GO:0044464,GO:0050789,GO:0050794,GO:0051171,GO:0051252,GO:0060255,GO:0065007,GO:0080090,GO:0097159,GO:0140110,GO:…	-	-	-	-	-	-	-	-	-	-	TetR_C,TetR_N
lcl|NC_009525.1_cds_WP_003898837.1_1425	419947.MRA_1362	0.0	1219.0	COG2203@1|root,COG5001@1|root,COG2203@2|Bacteria,COG5001@2|Bacteria,2GIZF@201174|Actinobacteria,233TE@1762|Mycobacteriaceae	201174|Actinobacteria	T	GGDEF domain	-	GO:0003674,GO:0003824,GO:0005575,GO:0005623,GO:0005886,GO:0006139,GO:0006725,GO:0006753,GO:0006793,GO:0006796,GO:0006807,GO:0008081,GO:0008150,GO:0008152,GO:0009056,GO:0009058,GO:0009117,GO:0009165,GO:0009166,GO:0009187,GO:0009190,GO:0009214,GO:0009987,GO:0016020,GO:0016740,GO:0016772,GO:0016779,GO:0016787,GO:0016788,GO:0018130,GO:0019438,GO:0019439,GO:0019637,GO:0034404,GO:0034641,GO:0034654,GO:…	-	-	-	-	-	-	-	-	-	-	EAL,GAF,GAF_2,GGDEF
lcl|NC_009525.1_cds_WP_003898838.1_1426	419947.MRA_1363	0.0	1410.0	COG0476@1|root,COG0476@2|Bacteria,2HQ2F@201174|Actinobacteria,234X5@1762|Mycobacteriaceae	201174|Actinobacteria	H	involved in biosynthesis of a demolybdo cofactor (molybdopterin), necessary for molybdoenzymes. plays a role in the activation of the small subunit of the molybdopterin converting factor (MoaD)	moeY	GO:0003674,GO:0003824,GO:0005575,GO:0005623,GO:0005886,GO:0006139,GO:0006396,GO:0006399,GO:0006400,GO:0006725,GO:0006807,GO:0008033,GO:0008150,GO:0008152,GO:0009451,GO:0009987,GO:0010467,GO:0016020,GO:0016070,GO:0016829,GO:0016835,GO:0016836,GO:0034470,GO:0034641,GO:0034660,GO:0043170,GO:0043412,GO:0044237,GO:0044238,GO:0044464,GO:0046483,GO:0061503,GO:0061504,GO:0071704,GO:0071944,GO:0090304,GO:…	-	-	-	-	-	-	-	-	-	-	Nitroreductase,ThiF
lcl|NC_009525.1_cds_WP_003901139.1_1430	419947.MRA_1366	0.0	2232.0	COG2114@1|root,COG2197@1|root,COG3903@1|root,COG2114@2|Bacteria,COG2197@2|Bacteria,COG3903@2|Bacteria,2GIZ1@201174|Actinobacteria,233DM@1762|Mycobacteriaceae	201174|Actinobacteria	K	involved in signal transduction (via phosphorylation) involved in transcriptional regulatory mechanism and in the regulation of secondary metabolites catalytic activity ATP a protein ADP a phosphoprotein	-	-	-	-	-	-	-	-	-	-	-	-	GerE,Guanylate_cyc,NB-ARC
lcl|NC_009525.1_cds_WP_003898842.1_1433	419947.MRA_1369	7.97e-252	690.0	COG2141@1|root,COG2141@2|Bacteria,2GNE9@201174|Actinobacteria,232XS@1762|Mycobacteriaceae	201174|Actinobacteria	C	F420-dependent oxidoreductase	-	-	-	-	-	-	-	-	-	-	-	-	Bac_luciferase
lcl|NC_009525.1_cds_WP_003901140.1_1434	419947.MRA_1370	1.88e-244	676.0	COG5651@1|root,COG5651@2|Bacteria,2IBZU@201174|Actinobacteria,23F1B@1762|Mycobacteriaceae	201174|Actinobacteria	N	was demonstrated in lysates by immunodetection (see Dillon et al., 1999)	-	GO:0005575,GO:0005618,GO:0005623,GO:0008150,GO:0009605,GO:0009607,GO:0030312,GO:0043207,GO:0044403,GO:0044419,GO:0044464,GO:0050896,GO:0051701,GO:0051704,GO:0051707,GO:0052173,GO:0052200,GO:0052564,GO:0052572,GO:0071944,GO:0075136	-	-	-	-	-	-	-	-	-	-	PE_PPE_C,PPE
lcl|NC_009525.1_cds_WP_003916806.1_1437	419947.MRA_1373	0.0	1258.0	COG1366@1|root,COG2172@1|root,COG2208@1|root,COG1366@2|Bacteria,COG2172@2|Bacteria,COG2208@2|Bacteria,2GK8P@201174|Actinobacteria,232KY@1762|Mycobacteriaceae	201174|Actinobacteria	T	Stage II sporulation protein E	rsbU	GO:0000287,GO:0003674,GO:0003824,GO:0004035,GO:0005488,GO:0005515,GO:0006355,GO:0006793,GO:0006796,GO:0008150,GO:0008152,GO:0009889,GO:0009987,GO:0010468,GO:0010556,GO:0016311,GO:0016787,GO:0016788,GO:0016791,GO:0019219,GO:0019222,GO:0030145,GO:0031323,GO:0031326,GO:0042578,GO:0042802,GO:0043167,GO:0043169,GO:0044237,GO:0046872,GO:0046914,GO:0050789,GO:0050794,GO:0051171,GO:0051252,GO:0060255,GO:…	-	-	-	-	-	-	-	-	-	-	GAF_2,HATPase_c_2,PAS_4,STAS,STAS_2,SpoIIE
lcl|NC_009525.1_cds_WP_003898845.1_1438	419947.MRA_1374	1.69e-89	262.0	COG1366@1|root,COG1366@2|Bacteria,2IM3X@201174|Actinobacteria,23AFE@1762|Mycobacteriaceae	201174|Actinobacteria	K	STAS domain	rsfA	GO:0000988,GO:0000989,GO:0003674,GO:0006355,GO:0008150,GO:0009889,GO:0009891,GO:0009893,GO:0010468,GO:0010556,GO:0010557,GO:0010604,GO:0010628,GO:0019219,GO:0019222,GO:0031323,GO:0031325,GO:0031326,GO:0031328,GO:0043856,GO:0045893,GO:0045935,GO:0048518,GO:0048522,GO:0050789,GO:0050794,GO:0051171,GO:0051173,GO:0051252,GO:0051254,GO:0060255,GO:0065007,GO:0080090,GO:0140110,GO:1902680,GO:1903506,GO:…	-	-	-	-	-	-	-	-	-	-	STAS,STAS_2
lcl|NC_009525.1_cds_WP_003407167.1_1440	419947.MRA_1376	2.91e-48	154.0	2DS19@1|root,33E2V@2|Bacteria,2GWIY@201174|Actinobacteria	201174|Actinobacteria	-	-	-	-	-	-	-	-	-	-	-	-	-	-	-
lcl|NC_009525.1_cds_WP_003898846.1_1441	419947.MRA_1377	2.59e-282	771.0	COG1680@1|root,COG1680@2|Bacteria,2H2SY@201174|Actinobacteria,232D3@1762|Mycobacteriaceae	201174|Actinobacteria	V	beta-lactamase	-	GO:0005575,GO:0005623,GO:0005886,GO:0016020,GO:0044464,GO:0071944	-	-	-	-	-	-	-	-	-	-	Beta-lactamase
lcl|NC_009525.1_cds_WP_003900326.1_1444	419947.MRA_1381	0.0	1000.0	COG5274@1|root,COG5274@2|Bacteria,2IC7V@201174|Actinobacteria,234ZX@1762|Mycobacteriaceae	201174|Actinobacteria	CI	Cytochrome b5-like Heme/Steroid binding domain	-	-	-	-	-	-	-	-	-	-	-	-	Cyt-b5,FA_desaturase
lcl|NC_009525.1_cds_WP_003898849.1_1446	419947.MRA_1383	9.99e-248	678.0	28KEA@1|root,2ZA0J@2|Bacteria,2I9YN@201174|Actinobacteria,233C8@1762|Mycobacteriaceae	201174|Actinobacteria	H	Involved in sulfation activity towards typical ceramide glycolipids and trehalose glycolipids	-	GO:0003674,GO:0003824,GO:0006082,GO:0006629,GO:0006790,GO:0008146,GO:0008150,GO:0008152,GO:0008610,GO:0009058,GO:0009987,GO:0016740,GO:0016782,GO:0043436,GO:0044237,GO:0044238,GO:0044249,GO:0044255,GO:0044272,GO:0044281,GO:0046505,GO:0046506,GO:0071704,GO:1901576	2.8.2.1	ko:K01014	ko05204,map05204	-	R01242	RC00007,RC00128	ko00000,ko00001,ko01000	-	-	-	Sulfotransfer_1
lcl|NC_009525.1_cds_WP_003898850.1_1448	419947.MRA_1384	0.0	878.0	COG1944@1|root,COG1944@2|Bacteria,2HTCK@201174|Actinobacteria,23821@1762|Mycobacteriaceae	201174|Actinobacteria	S	YcaO cyclodehydratase, ATP-ad Mg2+-binding	-	-	-	ko:K09136	-	-	-	-	ko00000,ko03009	-	-	-	YcaO
lcl|NC_009525.1_cds_WP_003900327.1_1449	419947.MRA_1385	0.0	980.0	COG3482@1|root,COG3482@2|Bacteria,2IDBJ@201174|Actinobacteria,238HR@1762|Mycobacteriaceae	201174|Actinobacteria	S	TfuA-like protein	-	-	-	-	-	-	-	-	-	-	-	-	TfuA
lcl|NC_009525.1_cds_WP_003898852.1_1450	419947.MRA_1386	6.21e-160	447.0	COG0500@1|root,COG0500@2|Bacteria,2GX4K@201174|Actinobacteria,237XT@1762|Mycobacteriaceae	201174|Actinobacteria	Q	Tellurite resistance protein TehB	-	-	-	-	-	-	-	-	-	-	-	-	Methyltransf_25
lcl|NC_009525.1_cds_WP_003911527.1_1451	419947.MRA_1387	6.09e-301	823.0	COG1403@1|root,COG1403@2|Bacteria,2I9AH@201174|Actinobacteria,232HK@1762|Mycobacteriaceae	201174|Actinobacteria	V	endonuclease	-	-	-	-	-	-	-	-	-	-	-	-	DUF222,HNH
lcl|NC_009525.1_cds_WP_003898853.1_1455	419947.MRA_1391	7.6e-113	324.0	COG0505@1|root,COG0505@2|Bacteria,2GM9I@201174|Actinobacteria,238QP@1762|Mycobacteriaceae	201174|Actinobacteria	EF	Belongs to the CarA family	-	-	-	-	-	-	-	-	-	-	-	-	-
lcl|NC_009525.1_cds_WP_003898855.1_1457	419947.MRA_1393	0.0	2173.0	COG0458@1|root,COG0458@2|Bacteria,2GK5N@201174|Actinobacteria,233XC@1762|Mycobacteriaceae	201174|Actinobacteria	F	Carbamoyl-phosphate synthetase ammonia chain	carB	GO:0000050,GO:0003674,GO:0003824,GO:0004087,GO:0004088,GO:0005575,GO:0005622,GO:0005623,GO:0005737,GO:0005886,GO:0006082,GO:0006520,GO:0006525,GO:0006526,GO:0006807,GO:0008150,GO:0008152,GO:0008652,GO:0009058,GO:0009064,GO:0009084,GO:0009987,GO:0016020,GO:0016053,GO:0016874,GO:0016879,GO:0016884,GO:0019627,GO:0019752,GO:0034641,GO:0043436,GO:0043603,GO:0043604,GO:0044237,GO:0044238,GO:0044249,GO:…	6.3.5.5	ko:K01955	ko00240,ko00250,ko01100,map00240,map00250,map01100	M00051	R00256,R00575,R01395,R10948,R10949	RC00002,RC00010,RC00043,RC02750,RC02798,RC03314	ko00000,ko00001,ko00002,ko01000	-	-	-	CPSase_L_D2,CPSase_L_D3,MGS
lcl|NC_009525.1_cds_WP_003407230.1_1460	419947.MRA_1396	0.0	872.0	COG5651@1|root,COG5651@2|Bacteria,2GN0X@201174|Actinobacteria,235QZ@1762|Mycobacteriaceae	201174|Actinobacteria	N	PPE family	-	-	-	-	-	-	-	-	-	-	-	-	PPE
lcl|NC_009525.1_cds_WP_003900331.1_1462	419947.MRA_1398	7.78e-143	403.0	COG3709@1|root,COG3709@2|Bacteria,2I4FH@201174|Actinobacteria,233EZ@1762|Mycobacteriaceae	201174|Actinobacteria	F	Essential for recycling GMP and indirectly, cGMP	gmk	GO:0000166,GO:0000287,GO:0001882,GO:0001883,GO:0003674,GO:0003824,GO:0004017,GO:0004385,GO:0005488,GO:0005524,GO:0005575,GO:0005622,GO:0005623,GO:0005737,GO:0005829,GO:0006139,GO:0006163,GO:0006725,GO:0006753,GO:0006793,GO:0006796,GO:0006807,GO:0008144,GO:0008150,GO:0008152,GO:0009058,GO:0009116,GO:0009117,GO:0009119,GO:0009123,GO:0009126,GO:0009132,GO:0009135,GO:0009150,GO:0009161,GO:0009165,GO:…	2.7.4.8	ko:K00942	ko00230,ko01100,map00230,map01100	M00050	R00332,R02090	RC00002	ko00000,ko00001,ko00002,ko01000	-	-	-	Guanylate_kin
lcl|NC_009525.1_cds_WP_003898859.1_1464	419947.MRA_1400	8.61e-291	795.0	COG0452@1|root,COG0452@2|Bacteria,2GJGJ@201174|Actinobacteria,232PQ@1762|Mycobacteriaceae	201174|Actinobacteria	H	Catalyzes two steps in the biosynthesis of coenzyme A. In the first step cysteine is conjugated to 4'-phosphopantothenate to form 4-phosphopantothenoylcysteine, in the latter compound is decarboxylated to form 4'-phosphopantotheine	coaBC	GO:0003674,GO:0003824,GO:0004633,GO:0005575,GO:0005623,GO:0005886,GO:0006139,GO:0006163,GO:0006164,GO:0006725,GO:0006732,GO:0006753,GO:0006793,GO:0006796,GO:0006807,GO:0008150,GO:0008152,GO:0009058,GO:0009108,GO:0009117,GO:0009150,GO:0009152,GO:0009165,GO:0009259,GO:0009260,GO:0009987,GO:0015936,GO:0015937,GO:0016020,GO:0016829,GO:0016830,GO:0016831,GO:0018130,GO:0019438,GO:0019637,GO:0019693,GO:…	4.1.1.36,6.3.2.5	ko:K13038	ko00770,ko01100,map00770,map01100	M00120	R03269,R04231	RC00064,RC00090,RC00822	ko00000,ko00001,ko00002,ko01000	-	-	-	DFP,Flavoprotein
lcl|NC_009525.1_cds_WP_003900333.1_1465	419947.MRA_1401	1.72e-287	785.0	COG0192@1|root,COG0192@2|Bacteria,2GJ4U@201174|Actinobacteria,233PG@1762|Mycobacteriaceae	201174|Actinobacteria	H	Catalyzes the formation of S-adenosylmethionine (AdoMet) from methionine and ATP. The overall synthetic reaction is composed of two sequential steps, AdoMet formation and the subsequent tripolyphosphate hydrolysis which occurs prior to release of AdoMet from the enzyme	metK	GO:0003674,GO:0003824,GO:0004478,GO:0005488,GO:0005515,GO:0005575,GO:0005618,GO:0005622,GO:0005623,GO:0005737,GO:0005829,GO:0005886,GO:0008150,GO:0016020,GO:0016740,GO:0016765,GO:0019899,GO:0030312,GO:0035375,GO:0040007,GO:0044424,GO:0044444,GO:0044464,GO:0071944	2.5.1.6	ko:K00789	ko00270,ko01100,ko01110,ko01230,map00270,map01100,map01110,map01230	M00034,M00035,M00368,M00609	R00177,R04771	RC00021,RC01211	ko00000,ko00001,ko00002,ko01000	-	-	-	S-AdoMet_synt_C,S-AdoMet_synt_M,S-AdoMet_synt_N
lcl|NC_009525.1_cds_WP_003407257.1_1466	419947.MRA_1402	0.0	1018.0	COG2072@1|root,COG2072@2|Bacteria,2GMD5@201174|Actinobacteria,232CF@1762|Mycobacteriaceae	201174|Actinobacteria	P	flavoprotein involved in K transport	-	-	1.14.13.22	ko:K03379	ko00930,ko01120,ko01220,map00930,map01120,map01220	-	R02231,R06622	RC00662,RC01550	ko00000,ko00001,ko01000	-	-	-	Pyr_redox_3
lcl|NC_009525.1_cds_WP_003911514.1_1467	419947.MRA_1403	0.0	949.0	COG2124@1|root,COG2124@2|Bacteria,2GK4Z@201174|Actinobacteria,2389I@1762|Mycobacteriaceae	201174|Actinobacteria	C	Cytochrome P450	cyp132	-	-	-	-	-	-	-	-	-	-	-	p450
lcl|NC_009525.1_cds_WP_010886114.1_1469	419947.MRA_1405	6.87e-58	211.0	COG0657@1|root,COG0657@2|Bacteria	2|Bacteria	I	acetylesterase activity	-	-	3.1.1.3	ko:K01046	ko00561,ko01100,map00561,map01100	M00098	R02250,R02687	RC00020,RC00037,RC00041,RC00094	ko00000,ko00001,ko00002,ko01000	-	-	-	Abhydrolase_3,PE
lcl|NC_009525.1_cds_WP_003898861.1_1470	419947.MRA_1406	1.73e-89	262.0	COG1487@1|root,COG1487@2|Bacteria,2IN9Z@201174|Actinobacteria,23AA7@1762|Mycobacteriaceae	201174|Actinobacteria	S	Toxic component of a toxin-antitoxin (TA) module. An RNase	-	GO:0005575,GO:0005623,GO:0005886,GO:0016020,GO:0044464,GO:0071944	-	-	-	-	-	-	-	-	-	-	PIN
lcl|NC_009525.1_cds_WP_003407279.1_1473	419947.MRA_1409	1.03e-237	652.0	COG0657@1|root,COG0657@2|Bacteria,2GJYR@201174|Actinobacteria,233P8@1762|Mycobacteriaceae	201174|Actinobacteria	I	PFAM Alpha beta hydrolase	lipI	-	-	ko:K01066	-	-	-	-	ko00000,ko01000	-	-	-	Abhydrolase_3
lcl|NC_009525.1_cds_WP_031647000.1_1474	419947.MRA_1410	2.38e-138	393.0	COG3714@1|root,COG3714@2|Bacteria,2I157@201174|Actinobacteria,235QS@1762|Mycobacteriaceae	201174|Actinobacteria	S	membrane	-	-	-	-	-	-	-	-	-	-	-	-	YhhN
lcl|NC_009525.1_cds_WP_003407292.1_1476	419947.MRA_1412	2.25e-202	559.0	COG0500@1|root,COG2226@2|Bacteria,2GM2N@201174|Actinobacteria,234QX@1762|Mycobacteriaceae	201174|Actinobacteria	Q	Methyltransferase	-	-	-	-	-	-	-	-	-	-	-	-	Methyltransf_11,Methyltransf_25
lcl|NC_009525.1_cds_WP_003407297.1_1478	419947.MRA_1414	1.34e-194	540.0	COG0500@1|root,COG2226@2|Bacteria,2GM2N@201174|Actinobacteria,234QX@1762|Mycobacteriaceae	201174|Actinobacteria	Q	Methyltransferase	-	-	-	-	-	-	-	-	-	-	-	-	Methyltransf_11,Methyltransf_25
lcl|NC_009525.1_cds_WP_003900336.1_1479	419947.MRA_1415	6.09e-226	622.0	COG0223@1|root,COG0223@2|Bacteria,2GKH5@201174|Actinobacteria,2349H@1762|Mycobacteriaceae	201174|Actinobacteria	J	Attaches a formyl group to the free amino group of methionyl-tRNA(fMet). The formyl group appears to play a dual role in the initiator identity of N-formylmethionyl-tRNA by promoting its recognition by IF2 and preventing the misappropriation of this tRNA by the elongation apparatus	fmt	GO:0003674,GO:0003824,GO:0004479,GO:0006139,GO:0006396,GO:0006399,GO:0006400,GO:0006412,GO:0006413,GO:0006464,GO:0006518,GO:0006725,GO:0006807,GO:0008033,GO:0008150,GO:0008152,GO:0009058,GO:0009059,GO:0009451,GO:0009987,GO:0010467,GO:0016070,GO:0016740,GO:0016741,GO:0016742,GO:0019538,GO:0019988,GO:0034470,GO:0034641,GO:0034645,GO:0034660,GO:0036211,GO:0040007,GO:0043043,GO:0043170,GO:0043412,GO:…	2.1.2.9	ko:K00604	ko00670,ko00970,map00670,map00970	-	R03940	RC00026,RC00165	ko00000,ko00001,ko01000	-	-	-	Formyl_trans_C,Formyl_trans_N
lcl|NC_009525.1_cds_WP_003898865.1_1480	419947.MRA_1416	0.0	894.0	COG0144@1|root,COG0781@1|root,COG0144@2|Bacteria,COG0781@2|Bacteria,2GM21@201174|Actinobacteria,235CW@1762|Mycobacteriaceae	201174|Actinobacteria	JK	Belongs to the class I-like SAM-binding methyltransferase superfamily. RsmB NOP family	fmu	GO:0000154,GO:0001510,GO:0003674,GO:0003824,GO:0005575,GO:0005618,GO:0005622,GO:0005623,GO:0005737,GO:0005829,GO:0006139,GO:0006364,GO:0006396,GO:0006725,GO:0006807,GO:0008150,GO:0008152,GO:0008168,GO:0008169,GO:0008173,GO:0008649,GO:0008757,GO:0009383,GO:0009451,GO:0009987,GO:0010467,GO:0016070,GO:0016072,GO:0016434,GO:0016740,GO:0016741,GO:0022613,GO:0030312,GO:0031167,GO:0032259,GO:0034470,GO:…	2.1.1.176	ko:K03500	-	-	-	-	ko00000,ko01000,ko03009	-	-	-	Methyltr_RsmB-F,NusB
lcl|NC_009525.1_cds_WP_003898867.1_1482	419947.MRA_1418	3.31e-239	658.0	COG0117@1|root,COG1985@1|root,COG0117@2|Bacteria,COG1985@2|Bacteria,2GKAX@201174|Actinobacteria,234R1@1762|Mycobacteriaceae	201174|Actinobacteria	H	Converts 2,5-diamino-6-(ribosylamino)-4(3h)-pyrimidinone 5'-phosphate into 5-amino-6-(ribosylamino)-2,4(1h,3h)- pyrimidinedione 5'-phosphate	ribD	GO:0005575,GO:0005622,GO:0005623,GO:0005737,GO:0005829,GO:0005886,GO:0006139,GO:0006725,GO:0006807,GO:0008150,GO:0008152,GO:0009451,GO:0009987,GO:0016020,GO:0016070,GO:0034641,GO:0040007,GO:0043170,GO:0043412,GO:0044237,GO:0044238,GO:0044424,GO:0044444,GO:0044464,GO:0046483,GO:0071704,GO:0071944,GO:0090304,GO:1901360	1.1.1.193,3.5.4.26	ko:K11752	ko00740,ko01100,ko01110,ko02024,map00740,map01100,map01110,map02024	M00125	R03458,R03459	RC00204,RC00933	ko00000,ko00001,ko00002,ko01000	-	-	-	RibD_C,dCMP_cyt_deam_1
lcl|NC_009525.1_cds_WP_003407310.1_1483	419947.MRA_1419	0.0	1000.0	COG0477@1|root,COG0477@2|Bacteria,2GQFQ@201174|Actinobacteria,232N2@1762|Mycobacteriaceae	201174|Actinobacteria	EGP	Major facilitator superfamily	-	GO:0003674,GO:0005215,GO:0005488,GO:0005575,GO:0005623,GO:0005886,GO:0005887,GO:0006810,GO:0008144,GO:0008150,GO:0009405,GO:0015562,GO:0016020,GO:0016021,GO:0022857,GO:0031224,GO:0031226,GO:0044419,GO:0044425,GO:0044459,GO:0044464,GO:0051179,GO:0051234,GO:0051704,GO:0055085,GO:0071944	-	-	-	-	-	-	-	-	-	-	MFS_1
lcl|NC_009525.1_cds_WP_003407334.1_1487	419947.MRA_1424	8.31e-313	851.0	COG0108@1|root,COG0807@1|root,COG0108@2|Bacteria,COG0807@2|Bacteria,2GIWJ@201174|Actinobacteria,2349C@1762|Mycobacteriaceae	201174|Actinobacteria	H	Catalyzes the conversion of D-ribulose 5-phosphate to formate and 3,4-dihydroxy-2-butanone 4-phosphate	ribBA	GO:0005575,GO:0005576,GO:0008150,GO:0040007	3.5.4.25,4.1.99.12	ko:K14652	ko00740,ko00790,ko01100,ko01110,map00740,map00790,map01100,map01110	M00125,M00840	R00425,R07281	RC00293,RC01792,RC01815,RC02504	ko00000,ko00001,ko00002,ko01000	-	-	iNJ661.Rv1415	DHBP_synthase,GTP_cyclohydro2
lcl|NC_009525.1_cds_WP_003898873.1_1493	419947.MRA_1430	9.98e-215	593.0	COG1660@1|root,COG1660@2|Bacteria,2GMWB@201174|Actinobacteria,233GD@1762|Mycobacteriaceae	201174|Actinobacteria	S	Displays ATPase and GTPase activities	yvcJ	GO:0005575,GO:0005623,GO:0005886,GO:0016020,GO:0044464,GO:0071944	-	ko:K06958	-	-	-	-	ko00000,ko03019	-	-	-	ATP_bind_2
lcl|NC_009525.1_cds_WP_003407352.1_1494	419947.MRA_1431	1.94e-244	671.0	COG0391@1|root,COG0391@2|Bacteria,2GJBW@201174|Actinobacteria,2356E@1762|Mycobacteriaceae	201174|Actinobacteria	S	Required for morphogenesis under gluconeogenic growth conditions	-	-	-	-	-	-	-	-	-	-	-	-	UPF0052
lcl|NC_009525.1_cds_WP_003901156.1_1495	419947.MRA_1432	1.41e-217	602.0	COG1481@1|root,COG1481@2|Bacteria,2GJZU@201174|Actinobacteria,234JZ@1762|Mycobacteriaceae	201174|Actinobacteria	K	May be required for sporulation	whiA	GO:0005575,GO:0005618,GO:0005623,GO:0005886,GO:0008150,GO:0016020,GO:0030312,GO:0043937,GO:0044464,GO:0050789,GO:0050793,GO:0065007,GO:0071944	-	ko:K09762	-	-	-	-	ko00000	-	-	-	HTH_WhiA,LAGLIDADG_WhiA,WhiA_N
lcl|NC_009525.1_cds_WP_003898875.1_1497	419947.MRA_1434	0.0	908.0	COG1020@1|root,COG1020@2|Bacteria,2GKGU@201174|Actinobacteria,23579@1762|Mycobacteriaceae	201174|Actinobacteria	I	Belongs to the long-chain O-acyltransferase family	-	GO:0000302,GO:0001666,GO:0003674,GO:0003824,GO:0004144,GO:0005575,GO:0005618,GO:0005623,GO:0005886,GO:0006629,GO:0006638,GO:0006639,GO:0006641,GO:0006950,GO:0006979,GO:0008150,GO:0008152,GO:0008374,GO:0008610,GO:0009058,GO:0009628,GO:0009987,GO:0010035,GO:0016020,GO:0016411,GO:0016740,GO:0016746,GO:0016747,GO:0019432,GO:0030312,GO:0036293,GO:0040007,GO:0042221,GO:0042493,GO:0044110,GO:0044116,GO:…	-	-	-	-	-	-	-	-	-	-	DUF1298,WES_acyltransf
lcl|NC_009525.1_cds_WP_003407374.1_1500	419947.MRA_1437	2.33e-200	554.0	COG0204@1|root,COG0204@2|Bacteria,2GNBB@201174|Actinobacteria,232J8@1762|Mycobacteriaceae	201174|Actinobacteria	I	Acyltransferase	-	-	-	-	-	-	-	-	-	-	-	-	Acyltransferase
lcl|NC_009525.1_cds_WP_003407376.1_1501	419947.MRA_1438	5.09e-301	821.0	COG2508@1|root,COG2508@2|Bacteria,2GP6C@201174|Actinobacteria,235DR@1762|Mycobacteriaceae	201174|Actinobacteria	QT	PucR C-terminal helix-turn-helix domain	-	-	-	-	-	-	-	-	-	-	-	-	HTH_30
lcl|NC_009525.1_cds_WP_003898877.1_1503	419947.MRA_1440	0.0	1211.0	2CB1C@1|root,2Z7M2@2|Bacteria,2GM87@201174|Actinobacteria,236B6@1762|Mycobacteriaceae	201174|Actinobacteria	S	Transmembrane protein of unknown function (DUF3556)	-	-	-	-	-	-	-	-	-	-	-	-	DUF3556
lcl|NC_009525.1_cds_WP_010886115.1_1507	419947.MRA_1443	1.41e-53	177.0	29WFS@1|root,30I1P@2|Bacteria,2INRB@201174|Actinobacteria,23A4F@1762|Mycobacteriaceae	201174|Actinobacteria	-	-	-	-	-	-	-	-	-	-	-	-	-	-	-
lcl|NC_009525.1_cds_WP_003900339.1_1509	419947.MRA_1445	1.09e-290	794.0	COG0126@1|root,COG0126@2|Bacteria,2GJC6@201174|Actinobacteria,2348G@1762|Mycobacteriaceae	201174|Actinobacteria	F	Belongs to the phosphoglycerate kinase family	pgk	GO:0005575,GO:0005576,GO:0005622,GO:0005623,GO:0005737,GO:0005886,GO:0008150,GO:0016020,GO:0040007,GO:0044424,GO:0044464,GO:0071944	2.7.2.3,5.3.1.1	ko:K00927,ko:K01803	ko00010,ko00051,ko00562,ko00710,ko01100,ko01110,ko01120,ko01130,ko01200,ko01230,map00010,map00051,map00562,map00710,map01100,map01110,map01120,map01130,map01200,map01230	M00001,M00002,M00003,M00165,M00166,M00308,M00552	R01015,R01512	RC00002,RC00043,RC00423	ko00000,ko00001,ko00002,ko01000,ko04147	-	-	-	PGK
lcl|NC_009525.1_cds_WP_010886116.1_1514	83332.Rv1441c	3.4e-74	249.0	COG0657@1|root,COG0657@2|Bacteria,2IDC0@201174|Actinobacteria,2376I@1762|Mycobacteriaceae	201174|Actinobacteria	I	PE family	-	-	-	-	-	-	-	-	-	-	-	-	PE
lcl|NC_009525.1_cds_WP_003407433.1_1518	419947.MRA_1454	4.8e-170	475.0	COG0363@1|root,COG0363@2|Bacteria,2GMQ2@201174|Actinobacteria,232FR@1762|Mycobacteriaceae	201174|Actinobacteria	G	6-phosphogluconolactonase	pgl	GO:0003674,GO:0003824,GO:0005575,GO:0005622,GO:0005623,GO:0005737,GO:0005886,GO:0006081,GO:0006098,GO:0006139,GO:0006725,GO:0006732,GO:0006733,GO:0006739,GO:0006753,GO:0006793,GO:0006796,GO:0006807,GO:0008150,GO:0008152,GO:0009051,GO:0009117,GO:0009987,GO:0016020,GO:0016787,GO:0016788,GO:0017057,GO:0019362,GO:0019637,GO:0019682,GO:0019693,GO:0034641,GO:0044237,GO:0044238,GO:0044281,GO:0044424,GO:…	3.1.1.31	ko:K01057	ko00030,ko01100,ko01110,ko01120,ko01130,ko01200,map00030,map01100,map01110,map01120,map01130,map01200	M00004,M00006,M00008	R02035	RC00537	ko00000,ko00001,ko00002,ko01000	-	-	-	Glucosamine_iso
lcl|NC_009525.1_cds_WP_003911520.1_1519	419947.MRA_1455	2.35e-214	592.0	COG3429@1|root,COG3429@2|Bacteria,2GJ1H@201174|Actinobacteria,235CT@1762|Mycobacteriaceae	201174|Actinobacteria	G	OpcA protein	opcA	-	-	-	-	-	-	-	-	-	-	-	OpcA_G6PD_assem
lcl|NC_009525.1_cds_WP_003407443.1_1520	419947.MRA_1456	0.0	1054.0	COG0364@1|root,COG0364@2|Bacteria,2GISI@201174|Actinobacteria,233S5@1762|Mycobacteriaceae	201174|Actinobacteria	G	Catalyzes the oxidation of glucose 6-phosphate to 6- phosphogluconolactone	zwf	GO:0005575,GO:0005623,GO:0005886,GO:0016020,GO:0044464,GO:0071944	1.1.1.363,1.1.1.49	ko:K00036	ko00030,ko00480,ko01100,ko01110,ko01120,ko01130,ko01200,ko05230,map00030,map00480,map01100,map01110,map01120,map01130,map01200,map05230	M00004,M00006,M00008	R00835,R02736,R10907	RC00001,RC00066	ko00000,ko00001,ko00002,ko01000,ko04147	-	-	-	G6PD_C,G6PD_N
lcl|NC_009525.1_cds_WP_003912809.1_1521	419947.MRA_1457	4.71e-263	721.0	COG0176@1|root,COG0176@2|Bacteria,2GMF9@201174|Actinobacteria,236CP@1762|Mycobacteriaceae	201174|Actinobacteria	F	Transaldolase is important for the balance of metabolites in the pentose-phosphate pathway	tal	GO:0005575,GO:0005576,GO:0005622,GO:0005623,GO:0005737,GO:0005829,GO:0008150,GO:0040007,GO:0044424,GO:0044444,GO:0044464	2.2.1.2	ko:K00616	ko00030,ko01100,ko01110,ko01120,ko01130,ko01200,ko01230,map00030,map01100,map01110,map01120,map01130,map01200,map01230	M00004,M00007	R01827	RC00439,RC00604	ko00000,ko00001,ko00002,ko01000	-	-	-	TAL_FSA
lcl|NC_009525.1_cds_WP_003911550.1_1526	419947.MRA_1462	2.65e-307	837.0	COG2508@1|root,COG2508@2|Bacteria,2GN7Z@201174|Actinobacteria,235DE@1762|Mycobacteriaceae	201174|Actinobacteria	QT	transcriptional	-	-	-	-	-	-	-	-	-	-	-	-	HTH_30
lcl|NC_009525.1_cds_WP_003900341.1_1528	419947.MRA_1464	2.76e-214	590.0	COG0189@1|root,COG0189@2|Bacteria,2HI2Z@201174|Actinobacteria,23303@1762|Mycobacteriaceae	201174|Actinobacteria	HJ	ligase activity	dcsG	-	-	-	-	-	-	-	-	-	-	-	-
lcl|NC_009525.1_cds_WP_003911542.1_1532	419947.MRA_1468	0.0	1085.0	2BVCQ@1|root,32QSS@2|Bacteria,2I46E@201174|Actinobacteria,232EF@1762|Mycobacteriaceae	201174|Actinobacteria	S	transferase activity, transferring glycosyl groups	-	GO:0008150,GO:0040007	-	ko:K14339	-	-	-	-	ko00000,ko01000,ko01003	-	-	-	-
lcl|NC_009525.1_cds_WP_003902080.1_1533	419947.MRA_1469	9.72e-185	514.0	COG2345@1|root,COG2345@2|Bacteria,2GN8W@201174|Actinobacteria,2346M@1762|Mycobacteriaceae	201174|Actinobacteria	K	regulatory protein	sufR	-	-	-	-	-	-	-	-	-	-	-	HTH_11,HTH_20,HTH_24,HTH_5,MarR_2
lcl|NC_009525.1_cds_WP_003916827.1_1535	419947.MRA_1471	2.17e-287	785.0	COG0719@1|root,COG0719@2|Bacteria,2GJNV@201174|Actinobacteria,234AT@1762|Mycobacteriaceae	201174|Actinobacteria	O	FeS assembly protein SufD	sufD	GO:0008150,GO:0009605,GO:0009607,GO:0040007,GO:0043207,GO:0044403,GO:0044419,GO:0050896,GO:0051701,GO:0051704,GO:0051707,GO:0052173,GO:0052200,GO:0052564,GO:0052572,GO:0075136	-	ko:K09015	-	-	-	-	ko00000	-	-	-	UPF0051
lcl|NC_009525.1_cds_WP_003407489.1_1536	419947.MRA_1472	3.84e-190	528.0	COG0396@1|root,COG0396@2|Bacteria,2GKB7@201174|Actinobacteria,233X3@1762|Mycobacteriaceae	201174|Actinobacteria	O	FeS assembly ATPase SufC	sufC	-	-	ko:K09013	-	-	-	-	ko00000,ko02000	-	-	-	ABC_tran
lcl|NC_009525.1_cds_WP_003407490.1_1537	419947.MRA_1473	9.87e-301	820.0	COG0520@1|root,COG0520@2|Bacteria,2GIVK@201174|Actinobacteria,233H9@1762|Mycobacteriaceae	201174|Actinobacteria	E	Catalyzes the removal of elemental sulfur and selenium atoms from L-cysteine, L-cystine, L-selenocysteine, and L- selenocystine to produce L-alanine	sufS	GO:0005575,GO:0005623,GO:0005886,GO:0008150,GO:0016020,GO:0040007,GO:0044464,GO:0071944	2.8.1.7,4.4.1.16	ko:K11717	ko00450,ko01100,map00450,map01100	-	R03599,R11528	RC00961,RC01789,RC02313	ko00000,ko00001,ko01000	-	-	-	Aminotran_5
lcl|NC_009525.1_cds_WP_003900343.1_1540	419947.MRA_1476	0.0	1219.0	COG1960@1|root,COG1960@2|Bacteria,2GJIB@201174|Actinobacteria,234FA@1762|Mycobacteriaceae	201174|Actinobacteria	I	acyl-CoA dehydrogenase	fadE15	-	-	-	-	-	-	-	-	-	-	-	Acyl-CoA_dh_1,Acyl-CoA_dh_C,Acyl-CoA_dh_M,Acyl-CoA_dh_N,AcylCoA_DH_N
lcl|NC_009525.1_cds_WP_003900344.1_1542	419947.MRA_1478	0.0	1207.0	COG2217@1|root,COG2217@2|Bacteria,2GIRF@201174|Actinobacteria,232R5@1762|Mycobacteriaceae	201174|Actinobacteria	P	ATPase, P-type (transporting), HAD superfamily, subfamily IC	cadA	GO:0005575,GO:0005623,GO:0005886,GO:0016020,GO:0044464,GO:0071944	3.6.3.3,3.6.3.4,3.6.3.5,3.6.3.54	ko:K01533,ko:K01534,ko:K12950,ko:K12951,ko:K12954,ko:K12956,ko:K17686,ko:K21887	ko01524,ko04016,map01524,map04016	-	R00086	RC00002	ko00000,ko00001,ko01000	3.A.3,3.A.3.32,3.A.3.5,3.A.3.6	-	-	E1-E2_ATPase,HMA,Hydrolase
lcl|NC_009525.1_cds_WP_003900345.1_1543	419947.MRA_1479	3.33e-85	251.0	COG3118@1|root,COG3118@2|Bacteria,2INBT@201174|Actinobacteria,23A1F@1762|Mycobacteriaceae	201174|Actinobacteria	O	thioredoxin participates in various redox reactions through the reversible oxidation of its active center dithiol, to a disulfide, catalyzes dithiol-disulfide exchange reactions	trxA	-	-	-	-	-	-	-	-	-	-	-	Thioredoxin
lcl|NC_009525.1_cds_WP_003898888.1_1545	419947.MRA_1481	1.62e-196	545.0	COG1024@1|root,COG1024@2|Bacteria,2GJ7Z@201174|Actinobacteria,23552@1762|Mycobacteriaceae	201174|Actinobacteria	I	Belongs to the enoyl-CoA hydratase isomerase family	echA12	GO:0003674,GO:0003824,GO:0004300,GO:0005575,GO:0005623,GO:0005886,GO:0006082,GO:0006629,GO:0006631,GO:0006635,GO:0008150,GO:0008152,GO:0009056,GO:0009062,GO:0009987,GO:0016020,GO:0016042,GO:0016054,GO:0016829,GO:0016835,GO:0016836,GO:0019395,GO:0019752,GO:0030258,GO:0032787,GO:0034440,GO:0043436,GO:0044237,GO:0044238,GO:0044242,GO:0044248,GO:0044255,GO:0044281,GO:0044282,GO:0044464,GO:0046395,GO:…	4.2.1.17	ko:K01692	ko00071,ko00280,ko00281,ko00310,ko00360,ko00362,ko00380,ko00410,ko00627,ko00640,ko00650,ko00903,ko00930,ko01100,ko01110,ko01120,ko01130,ko01212,map00071,map00280,map00281,map00310,map00360,map00362,map00380,map00410,map00627,map00640,map00650,map00903,map00930,map01100,map01110,map01120,map01130,map01212	M00032,M00087	R03026,R03045,R04137,R04170,R04204,R04224,R04738,R04740,R04744,R04746,R04749,R05595,R06411,R06412,R06942,R08093	RC00831,RC00834,RC01086,RC01095,RC01098,RC01103,RC01217,RC02115	ko00000,ko00001,ko00002,ko01000	-	-	-	ECH_1
lcl|NC_009525.1_cds_WP_003407511.1_1547	419947.MRA_1483	3.09e-35	120.0	2E4I7@1|root,32ZDA@2|Bacteria,2IQBB@201174|Actinobacteria,23B7N@1762|Mycobacteriaceae	201174|Actinobacteria	S	transcriptional regulator	-	-	-	-	-	-	-	-	-	-	-	-	-
lcl|NC_009525.1_cds_WP_003898889.1_1549	419947.MRA_1485	0.0	1906.0	COG1048@1|root,COG1048@2|Bacteria,2GJD5@201174|Actinobacteria,234YF@1762|Mycobacteriaceae	201174|Actinobacteria	C	aconitate hydratase	acnA	GO:0003674,GO:0003676,GO:0003723,GO:0003729,GO:0003730,GO:0003824,GO:0003994,GO:0005488,GO:0005506,GO:0005575,GO:0005576,GO:0005618,GO:0005622,GO:0005623,GO:0005737,GO:0005739,GO:0005829,GO:0005886,GO:0006082,GO:0006091,GO:0006099,GO:0006101,GO:0006629,GO:0006631,GO:0008150,GO:0008152,GO:0008198,GO:0009060,GO:0009987,GO:0010035,GO:0010038,GO:0010039,GO:0015980,GO:0016020,GO:0016829,GO:0016835,GO:…	4.2.1.3	ko:K01681	ko00020,ko00630,ko00720,ko01100,ko01110,ko01120,ko01130,ko01200,ko01210,ko01230,map00020,map00630,map00720,map01100,map01110,map01120,map01130,map01200,map01210,map01230	M00009,M00010,M00012,M00173,M00740	R01324,R01325,R01900	RC00497,RC00498,RC00618	br01601,ko00000,ko00001,ko00002,ko01000	-	-	-	Aconitase,Aconitase_C
lcl|NC_009525.1_cds_WP_003407520.1_1550	419947.MRA_1486	5.18e-128	364.0	2C0SM@1|root,33UJA@2|Bacteria,2IBS4@201174|Actinobacteria,237BM@1762|Mycobacteriaceae	201174|Actinobacteria	-	-	-	-	-	-	-	-	-	-	-	-	-	-	-
lcl|NC_009525.1_cds_WP_003407529.1_1554	419947.MRA_1490	5.2e-225	620.0	COG1721@1|root,COG1721@2|Bacteria,2GKSJ@201174|Actinobacteria,232HQ@1762|Mycobacteriaceae	201174|Actinobacteria	S	conserved protein (some members contain a von Willebrand factor type A (vWA) domain)	-	GO:0005575,GO:0005622,GO:0005623,GO:0005737,GO:0005829,GO:0005886,GO:0008150,GO:0016020,GO:0040007,GO:0044424,GO:0044444,GO:0044464,GO:0071944	-	-	-	-	-	-	-	-	-	-	DUF58
lcl|NC_009525.1_cds_WP_003407537.1_1556	419947.MRA_1492	3.89e-206	569.0	COG2852@1|root,COG2852@2|Bacteria,2GNZQ@201174|Actinobacteria,233EH@1762|Mycobacteriaceae	201174|Actinobacteria	S	Protein conserved in bacteria	-	-	-	-	-	-	-	-	-	-	-	-	DUF559
lcl|NC_009525.1_cds_WP_003898892.1_1557	419947.MRA_1493	1.08e-166	467.0	COG1028@1|root,COG1028@2|Bacteria,2GK6C@201174|Actinobacteria,232PA@1762|Mycobacteriaceae	201174|Actinobacteria	IQ	reductase	fabG1	GO:0000166,GO:0003674,GO:0003824,GO:0004312,GO:0004316,GO:0005488,GO:0005575,GO:0005623,GO:0005886,GO:0006082,GO:0006629,GO:0006631,GO:0006633,GO:0008150,GO:0008152,GO:0008610,GO:0009058,GO:0009059,GO:0009273,GO:0009987,GO:0016020,GO:0016053,GO:0016491,GO:0016614,GO:0016616,GO:0016740,GO:0016746,GO:0016747,GO:0018454,GO:0019752,GO:0030497,GO:0032787,GO:0034645,GO:0036094,GO:0042546,GO:0043167,GO:…	1.1.1.100	ko:K00059,ko:K11610	ko00061,ko00333,ko00780,ko01040,ko01100,ko01130,ko01212,map00061,map00333,map00780,map01040,map01100,map01130,map01212	M00083,M00572	R04533,R04534,R04536,R04543,R04566,R04953,R04964,R07759,R07763,R10116,R10120,R11671	RC00029,RC00117	ko00000,ko00001,ko00002,ko01000,ko01004	-	-	-	adh_short_C2
lcl|NC_009525.1_cds_WP_003407553.1_1558	419947.MRA_1494	1.45e-191	531.0	COG0623@1|root,COG0623@2|Bacteria,2GJ65@201174|Actinobacteria,232M5@1762|Mycobacteriaceae	201174|Actinobacteria	I	Enoyl- acyl-carrier-protein reductase NADH	inhA	GO:0000166,GO:0003674,GO:0003824,GO:0004312,GO:0004318,GO:0005488,GO:0005504,GO:0005575,GO:0005618,GO:0005623,GO:0005886,GO:0006082,GO:0006629,GO:0006631,GO:0006633,GO:0008150,GO:0008152,GO:0008289,GO:0008610,GO:0009058,GO:0009059,GO:0009273,GO:0009987,GO:0016020,GO:0016053,GO:0016491,GO:0016627,GO:0016628,GO:0016740,GO:0016746,GO:0016747,GO:0019752,GO:0030312,GO:0030497,GO:0031406,GO:0032787,GO:…	1.3.1.10,1.3.1.9	ko:K00208,ko:K11611	ko00061,ko00333,ko00780,ko01100,ko01130,ko01212,map00061,map00333,map00780,map01100,map01130,map01212	M00083,M00572	R01404,R04429,R04430,R04724,R04725,R04955,R04956,R04958,R04959,R04961,R04962,R04966,R04967,R04969,R04970,R07765,R10118,R10122,R11671	RC00052,RC00076,RC00120	ko00000,ko00001,ko00002,ko01000,ko01004	-	-	-	adh_short_C2
lcl|NC_009525.1_cds_WP_003407559.1_1559	419947.MRA_1495	2.79e-254	696.0	COG0276@1|root,COG0276@2|Bacteria,2GJTQ@201174|Actinobacteria,234ZY@1762|Mycobacteriaceae	201174|Actinobacteria	H	Catalyzes the ferrous insertion into protoporphyrin IX	hemH	GO:0003674,GO:0003824,GO:0004325,GO:0005488,GO:0005575,GO:0005623,GO:0005886,GO:0006725,GO:0006778,GO:0006779,GO:0006783,GO:0006807,GO:0008150,GO:0008152,GO:0009058,GO:0009987,GO:0016020,GO:0016829,GO:0018130,GO:0019438,GO:0033013,GO:0033014,GO:0034641,GO:0040007,GO:0042168,GO:0042440,GO:0044237,GO:0044249,GO:0044271,GO:0044464,GO:0046148,GO:0046483,GO:0048037,GO:0051186,GO:0051188,GO:0051536,GO:…	4.99.1.1,4.99.1.9	ko:K01772	ko00860,ko01100,ko01110,map00860,map01100,map01110	M00121	R00310,R11329	RC01012	ko00000,ko00001,ko00002,ko01000	-	-	-	Ferrochelatase
lcl|NC_009525.1_cds_WP_009935820.1_1560	419947.MRA_1495A	1.15e-202	561.0	2BK9Y@1|root,32EQ4@2|Bacteria,2GMZH@201174|Actinobacteria,23452@1762|Mycobacteriaceae	201174|Actinobacteria	-	-	-	-	-	-	-	-	-	-	-	-	-	-	-
lcl|NC_009525.1_cds_WP_003407571.1_1562	419947.MRA_1497	5.69e-213	595.0	COG0330@1|root,COG0330@2|Bacteria,2GJ1U@201174|Actinobacteria,234MA@1762|Mycobacteriaceae	201174|Actinobacteria	O	COG0330 Membrane protease subunits, stomatin prohibitin homologs	hflK	GO:0005575,GO:0005576,GO:0005618,GO:0005623,GO:0005886,GO:0016020,GO:0030312,GO:0044464,GO:0071944	-	-	-	-	-	-	-	-	-	-	Band_7
lcl|NC_009525.1_cds_WP_003900347.1_1563	419947.MRA_1498	6.61e-71	214.0	2E1QD@1|root,32X0Q@2|Bacteria,2IKYM@201174|Actinobacteria,239X9@1762|Mycobacteriaceae	201174|Actinobacteria	S	DoxX-like family	-	-	-	-	-	-	-	-	-	-	-	-	DoxX_2
lcl|NC_009525.1_cds_WP_003898896.1_1565	419947.MRA_1500	5.83e-309	842.0	2A2DJ@1|root,30QQK@2|Bacteria,2GNEU@201174|Actinobacteria,236I1@1762|Mycobacteriaceae	201174|Actinobacteria	-	-	-	GO:0008150,GO:0040007	-	-	-	-	-	-	-	-	-	-	-
lcl|NC_009525.1_cds_WP_003407587.1_1568	419947.MRA_1503	0.0	1452.0	COG2185@1|root,COG2185@2|Bacteria,2I2N3@201174|Actinobacteria,2342H@1762|Mycobacteriaceae	201174|Actinobacteria	I	Methylmalonyl-CoA mutase	mutB	GO:0005575,GO:0005623,GO:0005886,GO:0006082,GO:0006629,GO:0006631,GO:0008150,GO:0008152,GO:0009987,GO:0016020,GO:0016999,GO:0017144,GO:0019541,GO:0019678,GO:0019752,GO:0032787,GO:0043436,GO:0044237,GO:0044238,GO:0044255,GO:0044281,GO:0044464,GO:0046459,GO:0071704,GO:0071944	5.4.99.2	ko:K01847	ko00280,ko00630,ko00640,ko00720,ko01100,ko01120,ko01200,map00280,map00630,map00640,map00720,map01100,map01120,map01200	M00373,M00376,M00741	R00833	RC00395	ko00000,ko00001,ko00002,ko01000	-	-	-	B12-binding,MM_CoA_mutase
lcl|NC_009525.1_cds_WP_003900349.1_1569	419947.MRA_1504	2.94e-61	188.0	2BSKF@1|root,32MNZ@2|Bacteria,2H9SY@201174|Actinobacteria	201174|Actinobacteria	-	-	-	-	-	-	-	-	-	-	-	-	-	-	-
lcl|NC_009525.1_cds_WP_023641476.1_1573	419947.MRA_1508	9.75e-154	432.0	COG0500@1|root,COG2226@2|Bacteria,2I509@201174|Actinobacteria,23AYZ@1762|Mycobacteriaceae	201174|Actinobacteria	Q	Methyltransferase domain	-	GO:0003674,GO:0003824,GO:0005575,GO:0005622,GO:0005623,GO:0005737,GO:0008150,GO:0008152,GO:0008168,GO:0008757,GO:0016740,GO:0016741,GO:0032259,GO:0044424,GO:0044464	-	-	-	-	-	-	-	-	-	-	Methyltransf_11
lcl|NC_009525.1_cds_WP_003898900.1_1574	419947.MRA_1509	4.94e-44	142.0	COG3360@1|root,COG3360@2|Bacteria,2IQ6Z@201174|Actinobacteria,23B1J@1762|Mycobacteriaceae	201174|Actinobacteria	S	bacterial proteins as well as one archaeal sequence. members of this family are typically of around 70 residues in length. the function of this family is	-	-	-	ko:K09165	-	-	-	-	ko00000	-	-	-	Dodecin
lcl|NC_009525.1_cds_WP_003898901.1_1577	419947.MRA_1512	6.68e-199	550.0	COG5285@1|root,COG5285@2|Bacteria,2HSK5@201174|Actinobacteria,23CT1@1762|Mycobacteriaceae	201174|Actinobacteria	Q	Phytanoyl-CoA dioxygenase (PhyH)	-	-	-	-	-	-	-	-	-	-	-	-	PhyH
lcl|NC_009525.1_cds_WP_003911545.1_1578	419947.MRA_1513	1.5e-233	640.0	COG1621@1|root,COG1621@2|Bacteria,2IQFC@201174|Actinobacteria,23B2G@1762|Mycobacteriaceae	201174|Actinobacteria	G	beta-fructofuranosidase activity	-	-	-	-	-	-	-	-	-	-	-	-	-
lcl|NC_009525.1_cds_MRA_RS21320_1579	419947.MRA_1515	2.98e-128	365.0	COG0399@1|root,COG0399@2|Bacteria,2GKD7@201174|Actinobacteria,23AAV@1762|Mycobacteriaceae	201174|Actinobacteria	E	Belongs to the DegT DnrJ EryC1 family	wecE	-	2.6.1.102,2.6.1.104,2.6.1.59	ko:K02805,ko:K13010,ko:K18653	ko00520,map00520	-	R10460,R10698	RC00006,RC00781	ko00000,ko00001,ko01000,ko01005,ko01007	-	-	-	DegT_DnrJ_EryC1
lcl|NC_009525.1_cds_WP_003407619.1_1580	419947.MRA_1516	1.55e-128	368.0	COG0110@1|root,COG0110@2|Bacteria,2HSNZ@201174|Actinobacteria,23DA0@1762|Mycobacteriaceae	201174|Actinobacteria	S	Hexapeptide repeat of succinyl-transferase	-	-	-	-	-	-	-	-	-	-	-	-	Hexapep
lcl|NC_009525.1_cds_WP_003898904.1_1581	419947.MRA_1517	2.39e-118	338.0	COG4106@1|root,COG4106@2|Bacteria,2H227@201174|Actinobacteria,23CW0@1762|Mycobacteriaceae	201174|Actinobacteria	S	Methyltransferase domain	-	GO:0002682,GO:0002683,GO:0006629,GO:0006643,GO:0006664,GO:0008150,GO:0008152,GO:0008610,GO:0009058,GO:0009247,GO:0009605,GO:0009607,GO:0009987,GO:0031347,GO:0031348,GO:0035821,GO:0043207,GO:0044003,GO:0044237,GO:0044238,GO:0044249,GO:0044255,GO:0044403,GO:0044413,GO:0044414,GO:0044419,GO:0045088,GO:0045824,GO:0046467,GO:0048519,GO:0048583,GO:0048585,GO:0050776,GO:0050777,GO:0050789,GO:0050896,GO:…	-	-	-	-	-	-	-	-	-	-	Methyltransf_25
lcl|NC_009525.1_cds_WP_003898905.1_1584	419947.MRA_1519	0.0	1182.0	2A18W@1|root,30PFA@2|Bacteria,2ICYV@201174|Actinobacteria,236W8@1762|Mycobacteriaceae	201174|Actinobacteria	S	Glycosyltransferase family 87	-	-	-	-	-	-	-	-	-	-	-	-	GT87
lcl|NC_009525.1_cds_WP_003407632.1_1586	419947.MRA_1521	4.73e-209	578.0	COG2227@1|root,COG2227@2|Bacteria,2H346@201174|Actinobacteria,23CE9@1762|Mycobacteriaceae	201174|Actinobacteria	H	Methyltransferase domain	-	-	-	-	-	-	-	-	-	-	-	-	Methyltransf_23
lcl|NC_009525.1_cds_WP_003407647.1_1591	419947.MRA_1525	1.1e-173	484.0	COG2242@1|root,COG2242@2|Bacteria,2HRNT@201174|Actinobacteria,236W2@1762|Mycobacteriaceae	201174|Actinobacteria	H	Methyltransferase FkbM domain	-	-	-	-	-	-	-	-	-	-	-	-	Methyltransf_21
lcl|NC_009525.1_cds_WP_003407650.1_1592	419947.MRA_1526	2.07e-192	533.0	COG1216@1|root,COG1216@2|Bacteria,2IK5X@201174|Actinobacteria,239B4@1762|Mycobacteriaceae	201174|Actinobacteria	S	Glycosyl transferase family 2	-	GO:0003674,GO:0003824,GO:0016740,GO:0016757	-	-	-	-	-	-	-	-	-	-	Glycos_transf_2
lcl|NC_009525.1_cds_WP_003900356.1_1593	419947.MRA_1527	7.67e-222	610.0	COG2227@1|root,COG2227@2|Bacteria,2H167@201174|Actinobacteria,23CXP@1762|Mycobacteriaceae	201174|Actinobacteria	H	Methyltransferase domain	-	-	-	-	-	-	-	-	-	-	-	-	Methyltransf_23
lcl|NC_009525.1_cds_WP_003900357.1_1594	419947.MRA_1528	2.89e-252	691.0	COG0463@1|root,COG0463@2|Bacteria,2I4FE@201174|Actinobacteria,234ZP@1762|Mycobacteriaceae	201174|Actinobacteria	M	Glycosyltransferase like family 2	-	-	-	-	-	-	-	-	-	-	-	-	Glycos_transf_2
lcl|NC_009525.1_cds_WP_003906617.1_1595	419947.MRA_1529	1.63e-160	452.0	2F6DN@1|root,33YWV@2|Bacteria,2GKWZ@201174|Actinobacteria,234FM@1762|Mycobacteriaceae	201174|Actinobacteria	S	Sap, sulfolipid-1-addressing protein	-	-	-	-	-	-	-	-	-	-	-	-	SfLAP
lcl|NC_009525.1_cds_WP_003407657.1_1598	419947.MRA_1532	3.4e-256	701.0	COG0463@1|root,COG0463@2|Bacteria,2I4FE@201174|Actinobacteria,234ZP@1762|Mycobacteriaceae	201174|Actinobacteria	M	Glycosyltransferase like family 2	-	GO:0003674,GO:0003824,GO:0005575,GO:0005618,GO:0005623,GO:0005886,GO:0016020,GO:0016740,GO:0016757,GO:0030312,GO:0044464,GO:0071944	-	-	-	-	-	-	-	-	-	-	Glycos_transf_2
lcl|NC_009525.1_cds_WP_003901187.1_1599	419947.MRA_1533	0.0	1155.0	COG0318@1|root,COG0318@2|Bacteria,2I2RH@201174|Actinobacteria,2343A@1762|Mycobacteriaceae	201174|Actinobacteria	IQ	Activates fatty acids by binding to coenzyme A	fadD25	GO:0003674,GO:0003824,GO:0005575,GO:0005623,GO:0005886,GO:0006082,GO:0006629,GO:0006631,GO:0006633,GO:0008150,GO:0008152,GO:0008610,GO:0009058,GO:0009987,GO:0016020,GO:0016053,GO:0016740,GO:0016772,GO:0016779,GO:0019752,GO:0032787,GO:0043436,GO:0044237,GO:0044238,GO:0044249,GO:0044255,GO:0044281,GO:0044283,GO:0044464,GO:0046394,GO:0070566,GO:0071704,GO:0071944,GO:0072330,GO:1901576	2.7.7.95,6.2.1.51	ko:K00666,ko:K12423,ko:K12425,ko:K12426,ko:K12427,ko:K12428,ko:K21059	-	-	R11537,R11538,R11922,R11923,R11924,R11925	RC00043	ko00000,ko01000,ko01004	-	-	iNJ661.Rv3801c	AMP-binding
lcl|NC_009525.1_cds_WP_003898915.1_1600	419947.MRA_1534	0.0	2028.0	COG1033@1|root,COG1511@1|root,COG2409@1|root,COG1033@2|Bacteria,COG1511@2|Bacteria,COG2409@2|Bacteria,2GIRQ@201174|Actinobacteria,232DR@1762|Mycobacteriaceae	201174|Actinobacteria	S	transport protein	mmpL8	GO:0005575,GO:0005618,GO:0005622,GO:0005623,GO:0005737,GO:0005829,GO:0008150,GO:0009605,GO:0009607,GO:0030312,GO:0043207,GO:0044403,GO:0044419,GO:0044424,GO:0044444,GO:0044464,GO:0050896,GO:0051701,GO:0051704,GO:0051707,GO:0052173,GO:0052200,GO:0052564,GO:0052572,GO:0071944,GO:0075136	-	ko:K06994	-	-	-	-	ko00000	-	-	-	MMPL
lcl|NC_009525.1_cds_WP_003407670.1_1601	419947.MRA_1535	3.15e-257	704.0	COG0500@1|root,COG2226@2|Bacteria,2GJUF@201174|Actinobacteria,236M1@1762|Mycobacteriaceae	201174|Actinobacteria	Q	Catalyzes the methylation of the lipid moiety of the intermediate compounds phthiotriol and glycosylated phenolphthiotriol dimycoserosates to form phthiocerol dimycocerosates (DIM A) and glycosylated phenolphthiocerol dimycocerosates (PGL)	-	-	-	-	-	-	-	-	-	-	-	-	Methyltransf_11
lcl|NC_009525.1_cds_WP_003407671.1_1602	419947.MRA_1536	5.49e-301	820.0	COG1819@1|root,COG1819@2|Bacteria,2GJMF@201174|Actinobacteria,233CP@1762|Mycobacteriaceae	201174|Actinobacteria	CG	COG1819 Glycosyl transferases, related to UDP-glucuronosyltransferase	-	GO:0003674,GO:0003824,GO:0005575,GO:0005622,GO:0005623,GO:0008194,GO:0016740,GO:0016757,GO:0043226,GO:0043227,GO:0043229,GO:0043231,GO:0044424,GO:0044464	2.4.1.173	ko:K05841	-	-	-	-	ko00000,ko01000,ko01003	-	GT1	-	Glyco_transf_28,UDPGT
lcl|NC_009525.1_cds_WP_003913253.1_1605	419947.MRA_1539	0.0	4140.0	COG0604@1|root,COG1028@1|root,COG3321@1|root,COG0604@2|Bacteria,COG1028@2|Bacteria,COG3321@2|Bacteria,2H477@201174|Actinobacteria,232E7@1762|Mycobacteriaceae	201174|Actinobacteria	Q	polyketide synthase	pks5	GO:0005575,GO:0005618,GO:0005622,GO:0005623,GO:0005737,GO:0005829,GO:0005886,GO:0008150,GO:0009405,GO:0016020,GO:0030312,GO:0044419,GO:0044424,GO:0044444,GO:0044464,GO:0051704,GO:0071944	2.3.1.111,2.3.1.252	ko:K11628,ko:K12431,ko:K12432,ko:K12433,ko:K12442,ko:K12443	-	-	R05189,R11450,R11451	RC00039,RC03439	ko00000,ko01000,ko01004	-	-	iNJ661.Rv2934	ADH_N,ADH_zinc_N,ADH_zinc_N_2,Acyl_transf_1,KAsynt_C_assoc,KR,Ketoacyl-synt_C,PP-binding,PS-DH,ketoacyl-synt
lcl|NC_009525.1_cds_WP_003898919.1_1606	419947.MRA_1540	1.94e-115	330.0	COG1020@1|root,COG1020@2|Bacteria	2|Bacteria	Q	D-alanine [D-alanyl carrier protein] ligase activity	papA4	-	-	-	-	-	-	-	-	-	-	-	AMP-binding,AMP-binding_C,Condensation,KAsynt_C_assoc,KR,Ketoacyl-synt_C,PP-binding,PS-DH,Thioesterase,ketoacyl-synt
lcl|NC_009525.1_cds_WP_003898920.1_1607	419947.MRA_1541	0.0	1164.0	COG0318@1|root,COG0318@2|Bacteria,2I2RH@201174|Actinobacteria,2343A@1762|Mycobacteriaceae	201174|Actinobacteria	IQ	Activates fatty acids by binding to coenzyme A	fadD28	-	2.7.7.95,6.2.1.51	ko:K00666,ko:K12423,ko:K12425,ko:K12426,ko:K12427,ko:K12428,ko:K21059	-	-	R11537,R11538,R11922,R11923,R11924,R11925	RC00043	ko00000,ko01000,ko01004	-	-	iNJ661.Rv3801c	AMP-binding
lcl|NC_009525.1_cds_WP_003898921.1_1611	419947.MRA_1545	3.1e-269	737.0	COG2070@1|root,COG2070@2|Bacteria,2GKGT@201174|Actinobacteria,233FN@1762|Mycobacteriaceae	201174|Actinobacteria	S	2-nitropropane dioxygenase	-	-	-	-	-	-	-	-	-	-	-	-	NMO
lcl|NC_009525.1_cds_WP_003904641.1_1615	419947.MRA_1549	0.0	897.0	COG0389@1|root,COG0389@2|Bacteria,2GKBI@201174|Actinobacteria,23394@1762|Mycobacteriaceae	201174|Actinobacteria	L	Poorly processive, error-prone DNA polymerase involved in untargeted mutagenesis. Copies undamaged DNA at stalled replication forks, which arise in vivo from mismatched or misaligned primer ends. These misaligned primers can be extended by PolIV. Exhibits no 3'-5' exonuclease (proofreading) activity. May be involved in translesional synthesis, in conjunction with the beta clamp from PolIII	dinB	GO:0005575,GO:0005622,GO:0005623,GO:0005737,GO:0005829,GO:0005886,GO:0016020,GO:0044424,GO:0044444,GO:0044464,GO:0071944	2.7.7.7	ko:K02346	-	-	-	-	ko00000,ko01000,ko03400	-	-	-	HHH_5,IMS,IMS_C,IMS_HHH
lcl|NC_009525.1_cds_WP_003407720.1_1616	419947.MRA_1550	9.76e-230	633.0	COG0252@1|root,COG0252@2|Bacteria,2HUB2@201174|Actinobacteria,234W7@1762|Mycobacteriaceae	201174|Actinobacteria	EJ	Asparaginase	ansA	GO:0003674,GO:0003824,GO:0004067,GO:0005575,GO:0005622,GO:0005623,GO:0005737,GO:0005829,GO:0006082,GO:0006520,GO:0006528,GO:0006530,GO:0006807,GO:0008150,GO:0008152,GO:0009056,GO:0009063,GO:0009064,GO:0009065,GO:0009066,GO:0009068,GO:0009987,GO:0016054,GO:0016787,GO:0016810,GO:0016811,GO:0019752,GO:0032787,GO:0034641,GO:0043436,GO:0043603,GO:0044237,GO:0044238,GO:0044248,GO:0044281,GO:0044282,GO:…	3.5.1.1	ko:K01424	ko00250,ko00460,ko01100,ko01110,map00250,map00460,map01100,map01110	-	R00485	RC00010,RC02798	ko00000,ko00001,ko01000	-	-	-	Asparaginase
lcl|NC_009525.1_cds_WP_003407737.1_1622	419947.MRA_1556	2.21e-185	516.0	COG0300@1|root,COG0300@2|Bacteria,2GKJE@201174|Actinobacteria,23578@1762|Mycobacteriaceae	201174|Actinobacteria	S	Belongs to the short-chain dehydrogenases reductases (SDR) family	-	-	-	ko:K07124	-	-	-	-	ko00000	-	-	-	adh_short
lcl|NC_009525.1_cds_WP_003407748.1_1624	419947.MRA_1558	1.09e-99	289.0	COG3427@1|root,COG3427@2|Bacteria,2IJF7@201174|Actinobacteria,238SI@1762|Mycobacteriaceae	201174|Actinobacteria	S	Polyketide cyclase / dehydrase and lipid transport	-	GO:0005575,GO:0005623,GO:0005886,GO:0016020,GO:0044464,GO:0071944	-	-	-	-	-	-	-	-	-	-	Polyketide_cyc2
lcl|NC_009525.1_cds_WP_003407751.1_1625	419947.MRA_1559	0.0	2372.0	COG0587@1|root,COG0587@2|Bacteria,2GJ1P@201174|Actinobacteria,232SQ@1762|Mycobacteriaceae	201174|Actinobacteria	L	DNA polymerase	dnaE	GO:0005575,GO:0005618,GO:0005623,GO:0005886,GO:0008150,GO:0016020,GO:0030312,GO:0040007,GO:0044464,GO:0071944	2.7.7.7	ko:K02337	ko00230,ko00240,ko01100,ko03030,ko03430,ko03440,map00230,map00240,map01100,map03030,map03430,map03440	M00260	R00375,R00376,R00377,R00378	RC02795	ko00000,ko00001,ko00002,ko01000,ko03032,ko03400	-	-	-	DNA_pol3_alpha,HHH_6,PHP,tRNA_anti-codon
lcl|NC_009525.1_cds_WP_010886120.1_1626	419947.MRA_1560	7.3e-116	369.0	COG3210@1|root,COG5651@1|root,COG3210@2|Bacteria,COG5651@2|Bacteria,2H2RZ@201174|Actinobacteria,23CGV@1762|Mycobacteriaceae	201174|Actinobacteria	NU	PPE family	-	-	-	-	-	-	-	-	-	-	-	-	PPE,Pentapeptide_2
lcl|NC_009525.1_cds_MRA_RS08230_1627	419947.MRA_1561	2.31e-99	289.0	COG1022@1|root,COG1022@2|Bacteria,2GIXQ@201174|Actinobacteria,235IH@1762|Mycobacteriaceae	201174|Actinobacteria	I	synthetase	fadD11.1	-	-	-	-	-	-	-	-	-	-	-	AMP-binding
lcl|NC_009525.1_cds_WP_003898925.1_1630	419947.MRA_1564	0.0	1176.0	COG1053@1|root,COG1053@2|Bacteria,2GJ45@201174|Actinobacteria,235KN@1762|Mycobacteriaceae	201174|Actinobacteria	C	Fumarate reductase flavoprotein C-term	frdA	GO:0000104,GO:0003674,GO:0003824,GO:0005575,GO:0005622,GO:0005623,GO:0005886,GO:0006091,GO:0006113,GO:0008150,GO:0008152,GO:0009055,GO:0009061,GO:0009987,GO:0015980,GO:0016020,GO:0016491,GO:0016627,GO:0022900,GO:0032991,GO:0044237,GO:0044424,GO:0044425,GO:0044459,GO:0044464,GO:0045273,GO:0045274,GO:0045283,GO:0045284,GO:0045333,GO:0055114,GO:0070469,GO:0070470,GO:0071944,GO:0098796,GO:0098797,GO:…	1.3.5.1,1.3.5.4,1.4.3.16	ko:K00239,ko:K00244,ko:K00278	ko00020,ko00190,ko00250,ko00620,ko00650,ko00720,ko00760,ko01100,ko01110,ko01120,ko01130,ko01200,ko02020,ko05134,map00020,map00190,map00250,map00620,map00650,map00720,map00760,map01100,map01110,map01120,map01130,map01200,map02020,map05134	M00009,M00011,M00115,M00149,M00150,M00173,M00374,M00376	R00357,R00481,R02164	RC00006,RC00045,RC02566	ko00000,ko00001,ko00002,ko01000	-	-	iNJ661.Rv1552	FAD_binding_2,Succ_DH_flav_C
lcl|NC_009525.1_cds_WP_003407767.1_1631	419947.MRA_1565	6.95e-188	520.0	COG0479@1|root,COG0479@2|Bacteria,2GP9C@201174|Actinobacteria,235N9@1762|Mycobacteriaceae	201174|Actinobacteria	C	2Fe-2S iron-sulfur cluster binding domain	sdhB	-	1.3.5.1,1.3.5.4	ko:K00240,ko:K00245	ko00020,ko00190,ko00620,ko00650,ko00720,ko01100,ko01110,ko01120,ko01130,ko01200,ko02020,map00020,map00190,map00620,map00650,map00720,map01100,map01110,map01120,map01130,map01200,map02020	M00009,M00011,M00149,M00150,M00173,M00374,M00376	R02164	RC00045	ko00000,ko00001,ko00002,ko01000	-	-	iNJ661.Rv1553	Fer2_3,Fer4_8
lcl|NC_009525.1_cds_WP_003916859.1_1632	419947.MRA_1566	1.51e-82	244.0	COG3029@1|root,COG3029@2|Bacteria,2IQ2Z@201174|Actinobacteria,23A9K@1762|Mycobacteriaceae	201174|Actinobacteria	C	Seems to be involved in the anchoring of the catalytic components of the fumarate reductase complex to the cytoplasmic membrane	frdC	-	-	ko:K00246	ko00020,ko00190,ko00620,ko00650,ko00720,ko01100,ko01110,ko01120,ko01130,ko01200,ko02020,map00020,map00190,map00620,map00650,map00720,map01100,map01110,map01120,map01130,map01200,map02020	M00009,M00011,M00150,M00173	R02164	RC00045	ko00000,ko00001,ko00002	-	-	-	Fumarate_red_C
lcl|NC_009525.1_cds_MRA_RS08270_1635	419947.MRA_1569	2.82e-254	700.0	COG2409@1|root,COG2409@2|Bacteria,2H3X4@201174|Actinobacteria,23C9Q@1762|Mycobacteriaceae	201174|Actinobacteria	S	MMPL family	mmpL6	GO:0008150,GO:0010033,GO:0042221,GO:0050896	-	ko:K06994	-	-	-	-	ko00000	-	-	-	MMPL
lcl|NC_009525.1_cds_WP_003407780.1_1636	419947.MRA_1570	2.26e-108	311.0	COG1846@1|root,COG1846@2|Bacteria,2I3KG@201174|Actinobacteria,238P5@1762|Mycobacteriaceae	201174|Actinobacteria	K	nitroreductase	-	GO:0003674,GO:0005488,GO:0005575,GO:0005618,GO:0005623,GO:0005886,GO:0008150,GO:0008152,GO:0016020,GO:0030312,GO:0031406,GO:0036094,GO:0043167,GO:0043168,GO:0043177,GO:0044464,GO:0048037,GO:0050662,GO:0055114,GO:0070967,GO:0071944,GO:0097159,GO:0097367,GO:1901363	-	-	-	-	-	-	-	-	-	-	F420H2_quin_red,MarR
lcl|NC_009525.1_cds_WP_003407781.1_1637	419947.MRA_1571	6.75e-305	832.0	COG1171@1|root,COG1171@2|Bacteria,2GJAG@201174|Actinobacteria,233IP@1762|Mycobacteriaceae	201174|Actinobacteria	E	Catalyzes the anaerobic formation of alpha-ketobutyrate and ammonia from threonine in a two-step reaction. The first step involved a dehydration of threonine and a production of enamine intermediates (aminocrotonate), which tautomerizes to its imine form (iminobutyrate). Both intermediates are unstable and short- lived. The second step is the nonenzymatic hydrolysis of the enamine imine intermedi…	ilvA	GO:0005575,GO:0005623,GO:0005886,GO:0006082,GO:0006520,GO:0006566,GO:0006807,GO:0008150,GO:0008152,GO:0009066,GO:0009987,GO:0016020,GO:0019752,GO:0043436,GO:0044237,GO:0044238,GO:0044281,GO:0044464,GO:0071704,GO:0071944,GO:1901564,GO:1901605	4.3.1.19	ko:K01754	ko00260,ko00290,ko01100,ko01110,ko01130,ko01200,ko01230,map00260,map00290,map01100,map01110,map01130,map01200,map01230	M00570	R00220,R00996	RC00418,RC02600	ko00000,ko00001,ko00002,ko01000	-	-	iNJ661.Rv1559	PALP,Thr_dehydrat_C
lcl|NC_009525.1_cds_WP_003407790.1_1641	419947.MRA_1575	0.0	1552.0	COG3280@1|root,COG3280@2|Bacteria,2GJTB@201174|Actinobacteria,2353R@1762|Mycobacteriaceae	201174|Actinobacteria	G	synthase	treY	GO:0000272,GO:0003674,GO:0003824,GO:0005575,GO:0005622,GO:0005623,GO:0005737,GO:0005829,GO:0005975,GO:0005976,GO:0005984,GO:0005991,GO:0005992,GO:0006073,GO:0008150,GO:0008152,GO:0009056,GO:0009057,GO:0009058,GO:0009251,GO:0009311,GO:0009312,GO:0009987,GO:0016051,GO:0016052,GO:0016853,GO:0016866,GO:0030978,GO:0030980,GO:0034637,GO:0043170,GO:0044042,GO:0044237,GO:0044238,GO:0044247,GO:0044248,GO:…	5.4.99.15	ko:K06044	ko00500,ko01100,ko01110,map00500,map01100,map01110	M00565	R01824,R09995	-	ko00000,ko00001,ko00002,ko01000	-	GH13	-	Alpha-amylase
lcl|NC_009525.1_cds_WP_003898930.1_1642	419947.MRA_1576	0.0	1516.0	COG1523@1|root,COG1523@2|Bacteria,2GJ00@201174|Actinobacteria,232WU@1762|Mycobacteriaceae	201174|Actinobacteria	G	Belongs to the glycosyl hydrolase 13 family	glgX	-	3.2.1.68	ko:K01214	ko00500,ko01100,ko01110,map00500,map01100,map01110	M00565	R09995,R11261	-	ko00000,ko00001,ko00002,ko01000	-	CBM48,GH13	-	Alpha-amylase,CBM_48
lcl|NC_009525.1_cds_WP_003911567.1_1645	419947.MRA_1579	2.82e-66	203.0	2AW9U@1|root,31N59@2|Bacteria,2IP3J@201174|Actinobacteria,23A2S@1762|Mycobacteriaceae	201174|Actinobacteria	-	-	-	-	-	-	-	-	-	-	-	-	-	-	-
lcl|NC_009525.1_cds_MRA_RS22655_1664	419947.MRA_1598A	8.36e-154	432.0	COG1403@1|root,COG1403@2|Bacteria,2GU7G@201174|Actinobacteria,232NV@1762|Mycobacteriaceae	201174|Actinobacteria	V	Domain of unknown function (DUF222)	-	GO:0005575,GO:0005623,GO:0005886,GO:0016020,GO:0044464,GO:0071944	-	-	-	-	-	-	-	-	-	-	DUF222,HNH
lcl|NC_009525.1_cds_WP_003898934.1_1665	419947.MRA_1599	5.39e-250	686.0	COG0502@1|root,COG0502@2|Bacteria,2GIUE@201174|Actinobacteria,2347D@1762|Mycobacteriaceae	201174|Actinobacteria	H	Catalyzes the conversion of dethiobiotin (DTB) to biotin by the insertion of a sulfur atom into dethiobiotin via a radical- based mechanism	bioB	GO:0005575,GO:0005618,GO:0005623,GO:0005886,GO:0016020,GO:0030312,GO:0044464,GO:0071944	2.8.1.6	ko:K01012	ko00780,ko01100,map00780,map01100	M00123,M00573,M00577	R01078	RC00441	ko00000,ko00001,ko00002,ko01000	-	-	iNJ661.Rv1589	BATS,Radical_SAM
lcl|NC_009525.1_cds_WP_003898937.1_1669	419947.MRA_1603	3.98e-168	469.0	COG1051@1|root,COG1051@2|Bacteria,2GNMT@201174|Actinobacteria,2353S@1762|Mycobacteriaceae	201174|Actinobacteria	F	Nudix hydrolase	-	-	3.6.1.55	ko:K03574	-	-	-	-	ko00000,ko01000,ko03400	-	-	-	NUDIX
lcl|NC_009525.1_cds_WP_003407931.1_1670	419947.MRA_1604	7.44e-257	703.0	COG0379@1|root,COG0379@2|Bacteria,2GM59@201174|Actinobacteria,234ZJ@1762|Mycobacteriaceae	201174|Actinobacteria	H	Catalyzes the condensation of iminoaspartate with dihydroxyacetone phosphate to form quinolinate	nadA	GO:0003674,GO:0003824,GO:0005488,GO:0005575,GO:0005618,GO:0005622,GO:0005623,GO:0005737,GO:0005829,GO:0006082,GO:0006139,GO:0006520,GO:0006531,GO:0006725,GO:0006732,GO:0006733,GO:0006753,GO:0006793,GO:0006796,GO:0006807,GO:0008150,GO:0008152,GO:0008987,GO:0009058,GO:0009066,GO:0009108,GO:0009117,GO:0009165,GO:0009435,GO:0009987,GO:0016053,GO:0017144,GO:0018130,GO:0019355,GO:0019359,GO:0019362,GO:…	2.5.1.72	ko:K03517	ko00760,ko01100,map00760,map01100	M00115	R04292	RC01119	ko00000,ko00001,ko00002,ko01000	-	-	-	NadA
lcl|NC_009525.1_cds_WP_003901204.1_1671	419947.MRA_1605	0.0	1013.0	COG0029@1|root,COG0029@2|Bacteria,2I2IJ@201174|Actinobacteria,233KE@1762|Mycobacteriaceae	201174|Actinobacteria	H	Catalyzes the oxidation of L-aspartate to iminoaspartate	nadB	GO:0008150,GO:0040007	1.4.3.16	ko:K00278	ko00250,ko00760,ko01100,map00250,map00760,map01100	M00115	R00357,R00481	RC00006,RC02566	ko00000,ko00001,ko00002,ko01000	-	-	iNJ661.Rv1595	FAD_binding_2,Succ_DH_flav_C
lcl|NC_009525.1_cds_WP_003898939.1_1672	419947.MRA_1606	7.72e-195	541.0	COG0157@1|root,COG0157@2|Bacteria,2I2IP@201174|Actinobacteria,2336Y@1762|Mycobacteriaceae	201174|Actinobacteria	H	Belongs to the NadC ModD family	nadC	GO:0003674,GO:0003824,GO:0004514,GO:0005575,GO:0005618,GO:0005622,GO:0005623,GO:0005737,GO:0005886,GO:0006082,GO:0006139,GO:0006725,GO:0006732,GO:0006733,GO:0006753,GO:0006793,GO:0006796,GO:0006807,GO:0008150,GO:0008152,GO:0009056,GO:0009058,GO:0009108,GO:0009117,GO:0009165,GO:0009435,GO:0009987,GO:0016020,GO:0016054,GO:0016740,GO:0016757,GO:0016763,GO:0017144,GO:0018130,GO:0019359,GO:0019362,GO:…	2.4.2.19	ko:K00767	ko00760,ko01100,map00760,map01100	M00115	R03348	RC02877	ko00000,ko00001,ko00002,ko01000	-	-	-	QRPTase_C,QRPTase_N
lcl|NC_009525.1_cds_WP_003916833.1_1673	419947.MRA_1607	2.32e-184	512.0	COG0500@1|root,COG0500@2|Bacteria,2GM5T@201174|Actinobacteria,236HY@1762|Mycobacteriaceae	201174|Actinobacteria	Q	Methyltransferase domain	-	-	-	-	-	-	-	-	-	-	-	-	Methyltransf_11
lcl|NC_009525.1_cds_WP_003916835.1_1678	419947.MRA_1612	3.45e-145	409.0	COG0118@1|root,COG0118@2|Bacteria,2GIYS@201174|Actinobacteria,235WE@1762|Mycobacteriaceae	201174|Actinobacteria	E	IGPS catalyzes the conversion of PRFAR and glutamine to IGP, AICAR and glutamate. The HisH subunit provides the glutamine amidotransferase activity that produces the ammonia necessary to HisF for the synthesis of IGP and AICAR	hisH	GO:0005575,GO:0005618,GO:0005623,GO:0008150,GO:0030312,GO:0040007,GO:0044464,GO:0071944	-	ko:K02501	ko00340,ko01100,ko01110,ko01230,map00340,map01100,map01110,map01230	M00026	R04558	RC00010,RC01190,RC01943	ko00000,ko00001,ko00002,ko01000	-	-	-	GATase
lcl|NC_009525.1_cds_WP_003911572.1_1680	419947.MRA_1614	9.06e-191	530.0	COG0483@1|root,COG0483@2|Bacteria,2GJUM@201174|Actinobacteria,235HT@1762|Mycobacteriaceae	201174|Actinobacteria	G	Inositol monophosphatase	impA	GO:0003674,GO:0003824,GO:0005575,GO:0005623,GO:0005886,GO:0005975,GO:0006020,GO:0006021,GO:0006066,GO:0006793,GO:0006796,GO:0007154,GO:0007165,GO:0008150,GO:0008152,GO:0008934,GO:0009056,GO:0009058,GO:0009987,GO:0016020,GO:0016051,GO:0016311,GO:0016787,GO:0016788,GO:0016791,GO:0019637,GO:0019751,GO:0023052,GO:0034637,GO:0042578,GO:0043647,GO:0044237,GO:0044238,GO:0044249,GO:0044262,GO:0044281,GO:…	3.1.3.25	ko:K01092	ko00521,ko00562,ko01100,ko04070,map00521,map00562,map01100,map04070	M00131	R01185,R01186,R01187	RC00078	ko00000,ko00001,ko00002,ko01000	-	-	-	Inositol_P
lcl|NC_009525.1_cds_WP_003898942.1_1681	419947.MRA_1615	1.17e-180	504.0	COG0107@1|root,COG0107@2|Bacteria,2GIRP@201174|Actinobacteria,233I0@1762|Mycobacteriaceae	201174|Actinobacteria	E	IGPS catalyzes the conversion of PRFAR and glutamine to IGP, AICAR and glutamate. The HisF subunit catalyzes the cyclization activity that produces IGP and AICAR from PRFAR using the ammonia provided by the HisH subunit	hisF	GO:0000107,GO:0003674,GO:0003824,GO:0008150,GO:0016740,GO:0016757,GO:0016763,GO:0040007	4.1.3.27	ko:K01657,ko:K02500	ko00340,ko00400,ko00405,ko01100,ko01110,ko01130,ko01230,ko02024,ko02025,map00340,map00400,map00405,map01100,map01110,map01130,map01230,map02024,map02025	M00023,M00026	R00985,R00986,R04558	RC00010,RC01190,RC01943,RC02148,RC02414	ko00000,ko00001,ko00002,ko01000	-	-	-	His_biosynth
lcl|NC_009525.1_cds_WP_003898943.1_1683	419947.MRA_1617	2.54e-217	604.0	COG0387@1|root,COG0387@2|Bacteria,2GJWT@201174|Actinobacteria,236XF@1762|Mycobacteriaceae	201174|Actinobacteria	P	Sodium/calcium exchanger protein	chaA	-	-	ko:K07300	-	-	-	-	ko00000,ko02000	2.A.19	-	iNJ661.Rv1607	Na_Ca_ex
lcl|NC_009525.1_cds_WP_003407990.1_1687	419947.MRA_1621	1.12e-176	494.0	COG0134@1|root,COG0134@2|Bacteria,2GIVV@201174|Actinobacteria,232KE@1762|Mycobacteriaceae	201174|Actinobacteria	E	Belongs to the TrpC family	trpC	GO:0000162,GO:0000287,GO:0003674,GO:0003824,GO:0004425,GO:0005488,GO:0005575,GO:0005618,GO:0005623,GO:0005886,GO:0006082,GO:0006520,GO:0006568,GO:0006576,GO:0006586,GO:0006725,GO:0006793,GO:0006796,GO:0006807,GO:0008150,GO:0008152,GO:0008652,GO:0009058,GO:0009072,GO:0009073,GO:0009308,GO:0009309,GO:0009987,GO:0016020,GO:0016053,GO:0016829,GO:0016830,GO:0016831,GO:0018130,GO:0019438,GO:0019637,GO:…	4.1.1.48	ko:K01609	ko00400,ko01100,ko01110,ko01130,ko01230,map00400,map01100,map01110,map01130,map01230	M00023	R03508	RC00944	ko00000,ko00001,ko00002,ko01000	-	-	-	IGPS
lcl|NC_009525.1_cds_WP_003898945.1_1694	419947.MRA_1627	0.0	906.0	COG0469@1|root,COG0469@2|Bacteria,2GJY8@201174|Actinobacteria,2329W@1762|Mycobacteriaceae	201174|Actinobacteria	G	Belongs to the pyruvate kinase family	pyk	GO:0003674,GO:0003824,GO:0004743,GO:0005575,GO:0005622,GO:0005623,GO:0005737,GO:0005829,GO:0005886,GO:0005975,GO:0006082,GO:0006090,GO:0006091,GO:0006096,GO:0006139,GO:0006163,GO:0006164,GO:0006165,GO:0006725,GO:0006732,GO:0006733,GO:0006753,GO:0006754,GO:0006757,GO:0006793,GO:0006796,GO:0006807,GO:0008150,GO:0008152,GO:0009056,GO:0009058,GO:0009108,GO:0009117,GO:0009123,GO:0009124,GO:0009126,GO:…	2.7.1.40	ko:K00873	ko00010,ko00230,ko00620,ko01100,ko01110,ko01120,ko01130,ko01200,ko01230,ko04922,ko04930,ko05165,ko05203,ko05230,map00010,map00230,map00620,map01100,map01110,map01120,map01130,map01200,map01230,map04922,map04930,map05165,map05203,map05230	M00001,M00002,M00049,M00050	R00200,R00430,R01138,R01858,R02320	RC00002,RC00015	ko00000,ko00001,ko00002,ko01000,ko04131,ko04147	-	-	-	PK,PK_C
lcl|NC_009525.1_cds_WP_009937039.1_1695	419947.MRA_1628	1.09e-222	613.0	COG1946@1|root,COG1946@2|Bacteria,2GJ1B@201174|Actinobacteria,23591@1762|Mycobacteriaceae	201174|Actinobacteria	I	Acyl-CoA thioesterase	tesB1	-	-	ko:K10805	ko01040,map01040	-	-	-	ko00000,ko00001,ko01000,ko01004	-	-	-	4HBT_3,Acyl_CoA_thio
lcl|NC_009525.1_cds_WP_003900378.1_1696	419947.MRA_1629	0.0	945.0	COG2898@1|root,COG2898@2|Bacteria,2GNAA@201174|Actinobacteria,233GN@1762|Mycobacteriaceae	201174|Actinobacteria	S	Uncharacterised conserved protein (DUF2156)	-	-	-	-	-	-	-	-	-	-	-	-	DUF2156
lcl|NC_009525.1_cds_WP_003908715.1_1697	419947.MRA_1630	0.0	1011.0	COG1132@1|root,COG1132@2|Bacteria,2GITR@201174|Actinobacteria,234Q2@1762|Mycobacteriaceae	201174|Actinobacteria	V	ABC transporter	cydC	-	-	ko:K06147,ko:K06148,ko:K16012	ko02010,map02010	-	-	-	ko00000,ko00001,ko02000	3.A.1,3.A.1.106,3.A.1.109,3.A.1.129,3.A.1.21	-	-	ABC_membrane,ABC_tran
lcl|NC_009525.1_cds_WP_003408024.1_1699	419947.MRA_1632	1.62e-254	697.0	COG1294@1|root,COG1294@2|Bacteria,2GMFV@201174|Actinobacteria,234SG@1762|Mycobacteriaceae	201174|Actinobacteria	C	cytochrome D ubiquinol oxidase subunit II	cydB	-	1.10.3.14	ko:K00426	ko00190,ko01100,ko02020,map00190,map01100,map02020	M00153	R11325	RC00061	ko00000,ko00001,ko00002,ko01000	3.D.4.3	-	-	Cyt_bd_oxida_II
lcl|NC_009525.1_cds_WP_003408027.1_1700	419947.MRA_1633	0.0	976.0	COG1271@1|root,COG1271@2|Bacteria,2GJE4@201174|Actinobacteria,234HV@1762|Mycobacteriaceae	201174|Actinobacteria	C	ubiquinol oxidase (Subunit I)	cydA	-	1.10.3.14	ko:K00425	ko00190,ko01100,ko02020,map00190,map01100,map02020	M00153	R11325	RC00061	ko00000,ko00001,ko00002,ko01000	3.D.4.3	-	-	Cyt_bd_oxida_I
lcl|NC_009525.1_cds_WP_003898948.1_1701	419947.MRA_1634	3.3e-124	355.0	COG3247@1|root,COG3247@2|Bacteria,2H3AT@201174|Actinobacteria,237S5@1762|Mycobacteriaceae	201174|Actinobacteria	S	Short repeat of unknown function (DUF308)	-	-	-	-	-	-	-	-	-	-	-	-	DUF308
lcl|NC_009525.1_cds_WP_003408063.1_1706	419947.MRA_1639	0.0	1747.0	COG0258@1|root,COG0749@1|root,COG0258@2|Bacteria,COG0749@2|Bacteria,2GJY2@201174|Actinobacteria,2338A@1762|Mycobacteriaceae	201174|Actinobacteria	L	In addition to polymerase activity, this DNA polymerase exhibits 5'-3' exonuclease activity	polA	GO:0003674,GO:0003824,GO:0003887,GO:0004518,GO:0004527,GO:0005575,GO:0005618,GO:0005622,GO:0005623,GO:0005737,GO:0005886,GO:0006139,GO:0006259,GO:0006260,GO:0006261,GO:0006281,GO:0006725,GO:0006807,GO:0006950,GO:0006974,GO:0008150,GO:0008152,GO:0008409,GO:0009058,GO:0009059,GO:0009987,GO:0016020,GO:0016740,GO:0016772,GO:0016779,GO:0016787,GO:0016788,GO:0018130,GO:0019438,GO:0030312,GO:0033554,GO:…	2.7.7.7	ko:K02335	ko00230,ko00240,ko01100,ko03030,ko03410,ko03420,ko03440,map00230,map00240,map01100,map03030,map03410,map03420,map03440	-	R00375,R00376,R00377,R00378	RC02795	ko00000,ko00001,ko01000,ko03032,ko03400	-	-	-	5_3_exonuc,5_3_exonuc_N,DNA_pol_A,DNA_pol_A_exo1
lcl|NC_009525.1_cds_WP_003408069.1_1708	419947.MRA_1641	2.79e-295	805.0	COG0237@1|root,COG2320@1|root,COG0237@2|Bacteria,COG2320@2|Bacteria,2GN96@201174|Actinobacteria,235M3@1762|Mycobacteriaceae	201174|Actinobacteria	F	Catalyzes the phosphorylation of the 3'-hydroxyl group of dephosphocoenzyme A to form coenzyme A	coaE	GO:0000166,GO:0001882,GO:0001884,GO:0002135,GO:0003674,GO:0003824,GO:0004140,GO:0005488,GO:0005575,GO:0005622,GO:0005623,GO:0005737,GO:0005829,GO:0006139,GO:0006163,GO:0006164,GO:0006725,GO:0006732,GO:0006753,GO:0006793,GO:0006796,GO:0006807,GO:0008150,GO:0008152,GO:0009058,GO:0009108,GO:0009117,GO:0009150,GO:0009152,GO:0009165,GO:0009259,GO:0009260,GO:0009987,GO:0015936,GO:0015937,GO:0016301,GO:…	2.7.1.24	ko:K00859	ko00770,ko01100,map00770,map01100	M00120	R00130	RC00002,RC00078	ko00000,ko00001,ko00002,ko01000	-	-	-	CoaE,GrpB
lcl|NC_009525.1_cds_WP_003898953.1_1709	419947.MRA_1642	6.49e-94	275.0	COG2306@1|root,COG2306@2|Bacteria,2IMPI@201174|Actinobacteria,238S2@1762|Mycobacteriaceae	201174|Actinobacteria	S	Protein of unknown function (DUF402)	-	-	-	ko:K09146	-	-	-	-	ko00000	-	-	-	DUF402
lcl|NC_009525.1_cds_WP_003911575.1_1710	419947.MRA_1643	0.0	1349.0	COG0556@1|root,COG0556@2|Bacteria,2GJ03@201174|Actinobacteria,232N1@1762|Mycobacteriaceae	201174|Actinobacteria	L	damaged site, the DNA wraps around one UvrB monomer. DNA wrap is dependent on ATP binding by UvrB and probably causes local melting of the DNA helix, facilitating insertion of UvrB beta-hairpin between the DNA strands. Then UvrB probes one DNA strand for the presence of a lesion. If a lesion is found the UvrA subunits dissociate and the UvrB-DNA preincision complex is formed. This complex is subs…	uvrB	GO:0002682,GO:0002684,GO:0005575,GO:0005623,GO:0005886,GO:0006950,GO:0008150,GO:0009605,GO:0009607,GO:0016020,GO:0035821,GO:0043207,GO:0044003,GO:0044403,GO:0044419,GO:0044464,GO:0048518,GO:0048583,GO:0048584,GO:0050776,GO:0050778,GO:0050789,GO:0050896,GO:0051409,GO:0051701,GO:0051704,GO:0051707,GO:0051817,GO:0052031,GO:0052173,GO:0052200,GO:0052255,GO:0052552,GO:0052553,GO:0052555,GO:0052556,GO:…	-	ko:K03702	ko03420,map03420	-	-	-	ko00000,ko00001,ko03400	-	-	-	Helicase_C,ResIII,UVR,UvrB
lcl|NC_009525.1_cds_WP_003898954.1_1711	419947.MRA_1644	1.57e-313	857.0	COG0477@1|root,COG2814@2|Bacteria,2GP0J@201174|Actinobacteria,23449@1762|Mycobacteriaceae	201174|Actinobacteria	EGP	Major Facilitator	-	GO:0003674,GO:0005215,GO:0005575,GO:0005623,GO:0005886,GO:0005887,GO:0006810,GO:0008150,GO:0015562,GO:0015893,GO:0016020,GO:0016021,GO:0022857,GO:0031224,GO:0031226,GO:0042221,GO:0042493,GO:0042891,GO:0044425,GO:0044459,GO:0044464,GO:0050896,GO:0051179,GO:0051234,GO:0055085,GO:0071944	-	-	-	-	-	-	-	-	-	-	MFS_1
lcl|NC_009525.1_cds_WP_003408085.1_1713	419947.MRA_1646	2.98e-94	275.0	COG0589@1|root,COG0589@2|Bacteria,2IMMM@201174|Actinobacteria,238NE@1762|Mycobacteriaceae	201174|Actinobacteria	T	Universal stress protein	uspA3	GO:0005575,GO:0005618,GO:0005623,GO:0005886,GO:0008150,GO:0016020,GO:0030312,GO:0042221,GO:0044464,GO:0046677,GO:0050896,GO:0071944	-	-	-	-	-	-	-	-	-	-	Usp
lcl|NC_009525.1_cds_WP_003408092.1_1715	419947.MRA_1648	0.0	1923.0	COG0178@1|root,COG0178@2|Bacteria,2GJUV@201174|Actinobacteria,235Z8@1762|Mycobacteriaceae	201174|Actinobacteria	L	The UvrABC repair system catalyzes the recognition and processing of DNA lesions. UvrA is an ATPase and a DNA-binding protein. A damage recognition complex composed of 2 UvrA and 2 UvrB subunits scans DNA for abnormalities. When the presence of a lesion has been verified by UvrB, the UvrA molecules dissociate	uvrA	GO:0000018,GO:0005575,GO:0005618,GO:0005622,GO:0005623,GO:0005737,GO:0005829,GO:0005886,GO:0006950,GO:0006974,GO:0008150,GO:0009892,GO:0009987,GO:0010605,GO:0016020,GO:0019219,GO:0019222,GO:0030312,GO:0031323,GO:0031324,GO:0033554,GO:0044424,GO:0044444,GO:0044464,GO:0045910,GO:0045934,GO:0048519,GO:0048523,GO:0050789,GO:0050794,GO:0050896,GO:0051052,GO:0051053,GO:0051171,GO:0051172,GO:0051716,GO:…	-	ko:K03701	ko03420,map03420	-	-	-	ko00000,ko00001,ko03400	-	-	-	ABC_tran
lcl|NC_009525.1_cds_WP_003911576.1_1722	419947.MRA_1655	1.52e-168	473.0	COG0566@1|root,COG0566@2|Bacteria,2GJI6@201174|Actinobacteria,234FP@1762|Mycobacteriaceae	201174|Actinobacteria	J	Belongs to the class IV-like SAM-binding methyltransferase superfamily. RNA methyltransferase TrmH family	tsnR	-	-	ko:K03437	-	-	-	-	ko00000,ko03016	-	-	-	SpoU_methylase,SpoU_sub_bind
lcl|NC_009525.1_cds_WP_003900384.1_1724	419947.MRA_1657	2.3e-204	567.0	COG3391@1|root,COG3391@2|Bacteria,2I8WV@201174|Actinobacteria,238J0@1762|Mycobacteriaceae	201174|Actinobacteria	S	PE family	-	-	-	-	-	-	-	-	-	-	-	-	PE
lcl|NC_009525.1_cds_WP_003913695.1_1725	419947.MRA_1658	9.34e-213	588.0	COG2114@1|root,COG2114@2|Bacteria,2I900@201174|Actinobacteria,232TS@1762|Mycobacteriaceae	201174|Actinobacteria	T	Guanylate cyclase	-	-	4.6.1.1	ko:K01768	ko00230,ko02025,ko04113,ko04213,map00230,map02025,map04113,map04213	M00695	R00089,R00434	RC00295	ko00000,ko00001,ko00002,ko01000	-	-	iNJ661.Rv1647	Guanylate_cyc
lcl|NC_009525.1_cds_WP_003898958.1_1727	419947.MRA_1660	4.83e-245	673.0	COG0016@1|root,COG0016@2|Bacteria,2GJGG@201174|Actinobacteria,2346W@1762|Mycobacteriaceae	201174|Actinobacteria	J	Belongs to the class-II aminoacyl-tRNA synthetase family. Phe-tRNA synthetase alpha subunit type 1 subfamily	pheS	GO:0003674,GO:0003824,GO:0004812,GO:0004826,GO:0005575,GO:0005622,GO:0005623,GO:0005737,GO:0005886,GO:0006082,GO:0006139,GO:0006399,GO:0006412,GO:0006418,GO:0006432,GO:0006518,GO:0006520,GO:0006725,GO:0006807,GO:0008150,GO:0008152,GO:0009058,GO:0009059,GO:0009987,GO:0010467,GO:0016020,GO:0016070,GO:0016874,GO:0016875,GO:0019538,GO:0019752,GO:0034641,GO:0034645,GO:0034660,GO:0040007,GO:0043038,GO:…	6.1.1.20	ko:K01889	ko00970,map00970	M00359,M00360	R03660	RC00055,RC00523	ko00000,ko00001,ko00002,ko01000,ko01007,ko03016	-	-	-	Phe_tRNA-synt_N,tRNA-synt_2d
lcl|NC_009525.1_cds_WP_003901220.1_1728	419947.MRA_1661	0.0	1616.0	COG0072@1|root,COG0073@1|root,COG0072@2|Bacteria,COG0073@2|Bacteria,2GMFD@201174|Actinobacteria,2347H@1762|Mycobacteriaceae	201174|Actinobacteria	J	Belongs to the phenylalanyl-tRNA synthetase beta subunit family. Type 1 subfamily	pheT	GO:0005575,GO:0005618,GO:0005622,GO:0005623,GO:0005737,GO:0005886,GO:0006082,GO:0006139,GO:0006399,GO:0006412,GO:0006418,GO:0006432,GO:0006518,GO:0006520,GO:0006725,GO:0006807,GO:0008150,GO:0008152,GO:0009058,GO:0009059,GO:0009328,GO:0009987,GO:0010467,GO:0016020,GO:0016070,GO:0019538,GO:0019752,GO:0030312,GO:0032991,GO:0034641,GO:0034645,GO:0034660,GO:0040007,GO:0043038,GO:0043039,GO:0043043,GO:…	6.1.1.20	ko:K01890	ko00970,map00970	M00359,M00360	R03660	RC00055,RC00523	ko00000,ko00001,ko00002,ko01000,ko01007,ko03016	-	-	-	B3_4,B5,FDX-ACB,tRNA_bind
lcl|NC_009525.1_cds_WP_010886125.1_1729	419947.MRA_1662	2.95e-270	790.0	COG3391@1|root,COG3391@2|Bacteria,2I50B@201174|Actinobacteria,234PA@1762|Mycobacteriaceae	201174|Actinobacteria	S	PE family	-	-	-	-	-	-	-	-	-	-	-	-	PE
lcl|NC_009525.1_cds_WP_003898960.1_1730	419947.MRA_1663	2.28e-248	682.0	COG0002@1|root,COG0002@2|Bacteria,2GKQK@201174|Actinobacteria,232UY@1762|Mycobacteriaceae	201174|Actinobacteria	E	Catalyzes the NADPH-dependent reduction of N-acetyl-5- glutamyl phosphate to yield N-acetyl-L-glutamate 5-semialdehyde	argC	GO:0000166,GO:0003674,GO:0005488,GO:0008150,GO:0036094,GO:0040007,GO:0043167,GO:0043168,GO:0048037,GO:0050661,GO:0050662,GO:0070401,GO:0097159,GO:1901265,GO:1901363	1.2.1.38	ko:K00145	ko00220,ko01100,ko01110,ko01130,ko01210,ko01230,map00220,map01100,map01110,map01130,map01210,map01230	M00028,M00845	R03443	RC00684	ko00000,ko00001,ko00002,ko01000	-	-	-	Semialdhyde_dh,Semialdhyde_dhC
lcl|NC_009525.1_cds_WP_003900387.1_1739	419947.MRA_1672	0.0	4080.0	COG0604@1|root,COG3321@1|root,COG0604@2|Bacteria,COG3321@2|Bacteria,2H477@201174|Actinobacteria,232E7@1762|Mycobacteriaceae	201174|Actinobacteria	Q	polyketide synthase	pks7	-	-	ko:K12434	-	-	-	-	ko00000,ko01004	-	-	-	ADH_N,ADH_zinc_N_2,Acyl_transf_1,KAsynt_C_assoc,KR,Ketoacyl-synt_C,PP-binding,PS-DH,ketoacyl-synt
lcl|NC_009525.1_cds_WP_003911579.1_1740	419947.MRA_1673	0.0	3080.0	COG0604@1|root,COG3321@1|root,COG0604@2|Bacteria,COG3321@2|Bacteria,2H477@201174|Actinobacteria,232E7@1762|Mycobacteriaceae	201174|Actinobacteria	Q	polyketide synthase	pks8	-	-	ko:K12435	-	-	-	-	ko00000,ko01004	-	-	iNJ661.Rv1662	ADH_N,ADH_zinc_N,ADH_zinc_N_2,Acyl_transf_1,Docking,KAsynt_C_assoc,KR,Ketoacyl-synt_C,PP-binding,PS-DH,ketoacyl-synt
lcl|NC_009525.1_cds_WP_003901230.1_1741	419947.MRA_1674	0.0	964.0	COG0236@1|root,COG1028@1|root,COG0236@2|Bacteria,COG1028@2|Bacteria,2H3SB@201174|Actinobacteria,23F8V@1762|Mycobacteriaceae	201174|Actinobacteria	IQ	KR domain	pks17	-	-	ko:K12439	-	-	-	-	ko00000,ko01004	-	-	-	ADH_N,ADH_zinc_N_2,KR,NAD_binding_4,PP-binding,PS-DH
lcl|NC_009525.1_cds_WP_003900389.1_1742	419947.MRA_1675	0.0	1947.0	COG3321@1|root,COG3321@2|Bacteria,2H477@201174|Actinobacteria,236VF@1762|Mycobacteriaceae	201174|Actinobacteria	Q	Acyl transferase domain in polyketide synthase (PKS) enzymes.	pks9	-	2.3.1.111,2.3.1.252	ko:K11628,ko:K12431,ko:K12432,ko:K12433,ko:K12442,ko:K12443	-	-	R05189,R11450,R11451	RC00039,RC03439	ko00000,ko01000,ko01004	-	-	iNJ661.Rv2934	ADH_N,ADH_zinc_N,Acyl_transf_1,Condensation,KAsynt_C_assoc,KR,Ketoacyl-synt_C,PP-binding,PS-DH,ketoacyl-synt
lcl|NC_009525.1_cds_WP_003408248.1_1743	419947.MRA_1676	1.14e-253	696.0	COG3424@1|root,COG3424@2|Bacteria,2GV0U@201174|Actinobacteria,235DU@1762|Mycobacteriaceae	201174|Actinobacteria	Q	synthase	pks11	GO:0005575,GO:0005622,GO:0005623,GO:0005737,GO:0006629,GO:0006725,GO:0008150,GO:0008152,GO:0008610,GO:0009058,GO:0009273,GO:0009698,GO:0009699,GO:0009714,GO:0009715,GO:0009987,GO:0016043,GO:0019438,GO:0019748,GO:0022607,GO:0032991,GO:0034081,GO:0042180,GO:0042181,GO:0042546,GO:0044085,GO:0044237,GO:0044238,GO:0044249,GO:0044281,GO:0044283,GO:0044424,GO:0044444,GO:0044464,GO:0044550,GO:0071554,GO:…	-	ko:K16167	-	-	-	-	ko00000,ko01008	-	-	-	Chal_sti_synt_C,Chal_sti_synt_N
lcl|NC_009525.1_cds_WP_003901231.1_1744	419947.MRA_1677	9.67e-317	861.0	COG2124@1|root,COG2124@2|Bacteria,2GK4Z@201174|Actinobacteria,232RJ@1762|Mycobacteriaceae	201174|Actinobacteria	Q	cytochrome p450	cyp139A3	GO:0003674,GO:0003824,GO:0005575,GO:0005618,GO:0005623,GO:0006629,GO:0008150,GO:0008152,GO:0008202,GO:0016125,GO:0016491,GO:0030312,GO:0044238,GO:0044464,GO:0055114,GO:0071704,GO:0071944,GO:1901360,GO:1901615	-	-	-	-	-	-	-	-	-	-	p450
lcl|NC_009525.1_cds_WP_003408264.1_1749	419947.MRA_1682	2.62e-300	821.0	COG0477@1|root,COG0477@2|Bacteria,2I50C@201174|Actinobacteria,23F8W@1762|Mycobacteriaceae	201174|Actinobacteria	EGP	Major Facilitator Superfamily	-	-	-	-	-	-	-	-	-	-	-	-	MFS_1
lcl|NC_009525.1_cds_WP_003408266.1_1751	419947.MRA_1684	3.41e-151	425.0	COG0607@1|root,COG0640@1|root,COG0607@2|Bacteria,COG0640@2|Bacteria,2I98A@201174|Actinobacteria,23999@1762|Mycobacteriaceae	201174|Actinobacteria	K	Rhodanese-like domain	-	-	-	-	-	-	-	-	-	-	-	-	HTH_20,HTH_5,Rhodanese
lcl|NC_009525.1_cds_WP_003898967.1_1753	419947.MRA_1686	1.33e-170	476.0	COG0664@1|root,COG0664@2|Bacteria,2IB1J@201174|Actinobacteria,237EQ@1762|Mycobacteriaceae	201174|Actinobacteria	K	transcriptional	-	GO:0003674,GO:0003676,GO:0003677,GO:0005488,GO:0006355,GO:0008150,GO:0009889,GO:0010468,GO:0010556,GO:0019219,GO:0019222,GO:0031323,GO:0031326,GO:0050789,GO:0050794,GO:0051171,GO:0051252,GO:0060255,GO:0065007,GO:0080090,GO:0097159,GO:1901363,GO:1903506,GO:2000112,GO:2001141	-	ko:K21884	-	-	-	-	ko00000,ko03000	-	-	-	HTH_Crp_2,cNMP_binding
lcl|NC_009525.1_cds_WP_003898971.1_1758	419947.MRA_1691	5.52e-203	561.0	COG3221@1|root,COG3221@2|Bacteria,2GK9B@201174|Actinobacteria,237VV@1762|Mycobacteriaceae	201174|Actinobacteria	P	ABC transporter, phosphonate, periplasmic substrate-binding protein	-	-	-	-	-	-	-	-	-	-	-	-	Phosphonate-bd
lcl|NC_009525.1_cds_WP_003408366.1_1763	419947.MRA_1695	2.41e-141	399.0	COG1309@1|root,COG1309@2|Bacteria,2GP92@201174|Actinobacteria,234M0@1762|Mycobacteriaceae	201174|Actinobacteria	K	tetR family	-	-	-	-	-	-	-	-	-	-	-	-	TetR_N
lcl|NC_009525.1_cds_WP_003912666.1_1764	419947.MRA_1696	7.55e-149	421.0	COG0842@1|root,COG0842@2|Bacteria,2GJ7Y@201174|Actinobacteria,234G3@1762|Mycobacteriaceae	201174|Actinobacteria	V	Transport permease protein	-	-	-	ko:K01990,ko:K01992	-	M00254	-	-	ko00000,ko00002,ko02000	3.A.1	-	-	ABC2_membrane
lcl|NC_009525.1_cds_WP_003898975.1_1765	419947.MRA_1697	9.01e-179	498.0	COG1131@1|root,COG1131@2|Bacteria,2I2I7@201174|Actinobacteria,234TI@1762|Mycobacteriaceae	201174|Actinobacteria	V	ABC transporter	-	-	-	ko:K01990	-	M00254	-	-	ko00000,ko00002,ko02000	3.A.1	-	-	ABC_tran
lcl|NC_009525.1_cds_WP_003408373.1_1766	419947.MRA_1698	7.54e-143	403.0	COG2094@1|root,COG2094@2|Bacteria,2GNW1@201174|Actinobacteria,233YK@1762|Mycobacteriaceae	201174|Actinobacteria	L	Belongs to the DNA glycosylase MPG family	mpg	GO:0003674,GO:0003824,GO:0003905,GO:0006139,GO:0006259,GO:0006281,GO:0006284,GO:0006725,GO:0006807,GO:0006950,GO:0006974,GO:0008150,GO:0008152,GO:0009987,GO:0016787,GO:0016798,GO:0016799,GO:0019104,GO:0033554,GO:0034641,GO:0043170,GO:0044237,GO:0044238,GO:0044260,GO:0046483,GO:0050896,GO:0051716,GO:0071704,GO:0090304,GO:0140097,GO:1901360	3.2.2.21	ko:K03652	ko03410,map03410	-	-	-	ko00000,ko00001,ko01000,ko03400	-	-	-	Pur_DNA_glyco
lcl|NC_009525.1_cds_WP_003408379.1_1769	419947.MRA_1701	5.56e-166	465.0	COG0457@1|root,COG0457@2|Bacteria,2I469@201174|Actinobacteria,23F5A@1762|Mycobacteriaceae	201174|Actinobacteria	S	Tetratricopeptide repeat	-	-	-	-	-	-	-	-	-	-	-	-	TPR_5
lcl|NC_009525.1_cds_WP_003408390.1_1776	419947.MRA_1707	8.03e-207	574.0	2D1T0@1|root,32TBA@2|Bacteria,2I8E5@201174|Actinobacteria,2334W@1762|Mycobacteriaceae	201174|Actinobacteria	S	copper ion homeostasis	mctB	GO:0003674,GO:0005215,GO:0005575,GO:0005623,GO:0006810,GO:0006811,GO:0008150,GO:0009279,GO:0015267,GO:0015288,GO:0016020,GO:0016021,GO:0019867,GO:0022803,GO:0022829,GO:0022857,GO:0030312,GO:0030313,GO:0031224,GO:0031975,GO:0032991,GO:0044425,GO:0044462,GO:0044464,GO:0046930,GO:0051179,GO:0051234,GO:0055085,GO:0071944,GO:0098796	-	-	-	-	-	-	-	-	-	-	MctB
lcl|NC_009525.1_cds_WP_003898977.1_1780	419947.MRA_1711	0.0	919.0	COG1403@1|root,COG1403@2|Bacteria,2GU7G@201174|Actinobacteria,232NV@1762|Mycobacteriaceae	201174|Actinobacteria	V	Domain of unknown function (DUF222)	-	-	-	-	-	-	-	-	-	-	-	-	DUF222,HNH
lcl|NC_009525.1_cds_WP_009936386.1_1783	419947.MRA_1713	0.0	1073.0	COG1113@1|root,COG1113@2|Bacteria,2GJ0X@201174|Actinobacteria,234JB@1762|Mycobacteriaceae	201174|Actinobacteria	E	permease	cycA	-	-	ko:K03293,ko:K11737,ko:K16234	-	-	-	-	ko00000,ko02000	2.A.3.1,2.A.3.1.7,2.A.3.1.9	-	-	AA_permease
lcl|NC_009525.1_cds_WP_003898979.1_1784	419947.MRA_1714	1.71e-216	604.0	COG5651@1|root,COG5651@2|Bacteria,2IF38@201174|Actinobacteria,2365J@1762|Mycobacteriaceae	201174|Actinobacteria	N	PPE family	PPE22	-	-	-	-	-	-	-	-	-	-	-	PE_PPE_C,PPE
lcl|NC_009525.1_cds_WP_003898980.1_1785	419947.MRA_1715	8.5e-240	664.0	COG5651@1|root,COG5651@2|Bacteria,2IDH3@201174|Actinobacteria,236IH@1762|Mycobacteriaceae	201174|Actinobacteria	N	PPE family	-	-	-	-	-	-	-	-	-	-	-	-	PE_PPE_C,PPE
lcl|NC_009525.1_cds_WP_003898981.1_1787	419947.MRA_1717	0.0	882.0	COG0659@1|root,COG0659@2|Bacteria,2GJCB@201174|Actinobacteria,234TY@1762|Mycobacteriaceae	201174|Actinobacteria	P	Transporter	-	-	4.2.1.1	ko:K01673,ko:K03321	ko00910,map00910	-	R00132,R10092	RC02807	ko00000,ko00001,ko01000,ko02000	2.A.53.3	-	iNJ661.Rv3273	STAS,Sulfate_transp
lcl|NC_009525.1_cds_WP_003911586.1_1788	419947.MRA_1718	5.19e-206	571.0	COG1192@1|root,COG1192@2|Bacteria,2GJX3@201174|Actinobacteria,232B6@1762|Mycobacteriaceae	201174|Actinobacteria	D	involved in chromosome partitioning	soj	GO:0005575,GO:0005622,GO:0005623,GO:0005886,GO:0008150,GO:0009295,GO:0016020,GO:0040007,GO:0043226,GO:0043228,GO:0043229,GO:0043232,GO:0043590,GO:0044424,GO:0044464,GO:0071944	-	ko:K03496	-	-	-	-	ko00000,ko03036,ko04812	-	-	-	AAA_31
lcl|NC_009525.1_cds_WP_003408432.1_1789	419947.MRA_1719	4.82e-190	528.0	COG1354@1|root,COG1354@2|Bacteria,2GN1U@201174|Actinobacteria,23344@1762|Mycobacteriaceae	201174|Actinobacteria	D	Participates in chromosomal partition during cell division. May act via the formation of a condensin-like complex containing Smc and ScpB that pull DNA away from mid-cell into both cell halves	scpA	-	-	ko:K05896	-	-	-	-	ko00000,ko03036	-	-	-	SMC_ScpA
lcl|NC_009525.1_cds_WP_003898984.1_1793	419947.MRA_1723	0.0	884.0	COG1160@1|root,COG1160@2|Bacteria,2GJ8J@201174|Actinobacteria,232RA@1762|Mycobacteriaceae	201174|Actinobacteria	S	GTPase that plays an essential role in the late steps of ribosome biogenesis	der	GO:0005575,GO:0005618,GO:0005623,GO:0005886,GO:0008150,GO:0016020,GO:0030312,GO:0040007,GO:0044464,GO:0071944	-	ko:K03977	-	-	-	-	ko00000,ko03009	-	-	-	Cytidylate_kin,KH_dom-like,MMR_HSR1
lcl|NC_009525.1_cds_WP_003916848.1_1796	419947.MRA_1726	7.91e-213	586.0	COG1878@1|root,COG1878@2|Bacteria,2HNJS@201174|Actinobacteria,23799@1762|Mycobacteriaceae	201174|Actinobacteria	K	Putative cyclase	-	-	-	-	-	-	-	-	-	-	-	-	Cyclase
lcl|NC_009525.1_cds_WP_003898986.1_1797	419947.MRA_1727	5.48e-78	232.0	COG3837@1|root,COG3837@2|Bacteria,2GPTX@201174|Actinobacteria,23C5U@1762|Mycobacteriaceae	201174|Actinobacteria	S	Cupin domain	-	-	-	-	-	-	-	-	-	-	-	-	Cupin_2
lcl|NC_009525.1_cds_WP_003408456.1_1798	419947.MRA_1728	5.02e-189	525.0	COG3246@1|root,COG3246@2|Bacteria,2I9EQ@201174|Actinobacteria,238IV@1762|Mycobacteriaceae	201174|Actinobacteria	S	beta-keto acid cleavage enzyme	-	-	-	-	-	-	-	-	-	-	-	-	BKACE
lcl|NC_009525.1_cds_WP_003408469.1_1802	419947.MRA_1731	1.95e-41	136.0	2DG55@1|root,2ZUJE@2|Bacteria,2I09F@201174|Actinobacteria,23EAW@1762|Mycobacteriaceae	201174|Actinobacteria	-	-	-	-	-	-	-	-	-	-	-	-	-	-	-
lcl|NC_009525.1_cds_WP_003408473.1_1803	419947.MRA_1732	0.0	1014.0	COG0439@1|root,COG0439@2|Bacteria,2HTQR@201174|Actinobacteria,23508@1762|Mycobacteriaceae	201174|Actinobacteria	I	An AccC homodimer forms the biotin carboxylase subunit of the acetyl CoA carboxylase, an enzyme that catalyzes the formation of malonyl-CoA, which in turn controls the rate of fatty acid metabolism	-	-	-	-	-	-	-	-	-	-	-	-	ATP-grasp_3,CPSase_L_D2
lcl|NC_009525.1_cds_WP_003900395.1_1807	419947.MRA_1736	0.0	936.0	COG0277@1|root,COG0277@2|Bacteria,2GK5U@201174|Actinobacteria,2365P@1762|Mycobacteriaceae	201174|Actinobacteria	C	PFAM FAD linked oxidase domain protein	-	-	-	-	-	-	-	-	-	-	-	-	BBE,FAD_binding_4
lcl|NC_009525.1_cds_WP_003408495.1_1809	419947.MRA_1738	4e-187	519.0	COG0741@1|root,COG0741@2|Bacteria,2GNCG@201174|Actinobacteria,234IQ@1762|Mycobacteriaceae	201174|Actinobacteria	M	lytic transglycosylase activity	-	-	-	-	-	-	-	-	-	-	-	-	Peptidase_M23,SLT
lcl|NC_009525.1_cds_WP_003408499.1_1811	419947.MRA_1740	0.0	1051.0	COG1680@1|root,COG1680@2|Bacteria,2GNNF@201174|Actinobacteria,236ZJ@1762|Mycobacteriaceae	201174|Actinobacteria	V	Beta-lactamase	-	-	-	-	-	-	-	-	-	-	-	-	Beta-lactamase
lcl|NC_009525.1_cds_WP_003898989.1_1812	419947.MRA_1741	0.0	1019.0	COG1012@1|root,COG1012@2|Bacteria,2GJ95@201174|Actinobacteria,2338K@1762|Mycobacteriaceae	201174|Actinobacteria	C	Belongs to the aldehyde dehydrogenase family	gabD2	GO:0003674,GO:0003824,GO:0005575,GO:0005623,GO:0005886,GO:0006082,GO:0006091,GO:0006099,GO:0006101,GO:0008150,GO:0008152,GO:0009013,GO:0009060,GO:0009987,GO:0015980,GO:0016020,GO:0016491,GO:0016620,GO:0016903,GO:0016999,GO:0017144,GO:0019752,GO:0043436,GO:0044237,GO:0044238,GO:0044281,GO:0044464,GO:0045333,GO:0055114,GO:0071704,GO:0071944,GO:0072350	1.2.1.16,1.2.1.20,1.2.1.79	ko:K00135	ko00250,ko00310,ko00350,ko00650,ko00760,ko01100,ko01120,map00250,map00310,map00350,map00650,map00760,map01100,map01120	M00027	R00713,R00714,R02401	RC00080	ko00000,ko00001,ko00002,ko01000	-	-	-	Aldedh
lcl|NC_009525.1_cds_WP_003911592.1_1814	419947.MRA_1743	7.15e-140	396.0	2E3P4@1|root,32YM7@2|Bacteria,2HRP3@201174|Actinobacteria,2393H@1762|Mycobacteriaceae	201174|Actinobacteria	-	-	-	-	-	-	-	-	-	-	-	-	-	-	-
lcl|NC_009525.1_cds_WP_003901238.1_1818	419947.MRA_1747	0.0	1324.0	COG2180@1|root,COG2181@1|root,COG5013@1|root,COG2180@2|Bacteria,COG2181@2|Bacteria,COG5013@2|Bacteria,2GJVI@201174|Actinobacteria,232XY@1762|Mycobacteriaceae	201174|Actinobacteria	C	nitrate reductase, gamma subunit	narI	GO:0001666,GO:0006950,GO:0008150,GO:0009628,GO:0036293,GO:0050896,GO:0070482	1.7.5.1	ko:K00370,ko:K00374	ko00910,ko01120,ko02020,map00910,map01120,map02020	M00529,M00530,M00804	R00798,R01106,R09497	RC02812	ko00000,ko00001,ko00002,ko01000	5.A.3.1	-	iNJ661.Rv1164	Nitrate_red_gam
lcl|NC_009525.1_cds_WP_003898992.1_1819	419947.MRA_1748	3.39e-274	751.0	COG2223@1|root,COG2223@2|Bacteria,2GJ1I@201174|Actinobacteria,234GX@1762|Mycobacteriaceae	201174|Actinobacteria	P	Major facilitator superfamily	narK2	GO:0001666,GO:0006950,GO:0008150,GO:0009628,GO:0019222,GO:0031323,GO:0036293,GO:0050789,GO:0050794,GO:0050896,GO:0051171,GO:0062012,GO:0065007,GO:0070482,GO:0090352,GO:1903314	-	ko:K02575	ko00910,map00910	M00615	-	-	ko00000,ko00001,ko00002,ko02000	2.A.1.8	-	-	MFS_1,Sugar_tr
lcl|NC_009525.1_cds_WP_003408522.1_1820	419947.MRA_1749	3.27e-63	193.0	2EH65@1|root,3351X@2|Bacteria,2HS8J@201174|Actinobacteria,23B24@1762|Mycobacteriaceae	201174|Actinobacteria	S	Domain of unknown function (DUF1876)	-	GO:0005575,GO:0005622,GO:0005623,GO:0005737,GO:0005829,GO:0005886,GO:0008150,GO:0009605,GO:0009607,GO:0016020,GO:0040007,GO:0043207,GO:0044403,GO:0044419,GO:0044424,GO:0044444,GO:0044464,GO:0050896,GO:0051701,GO:0051704,GO:0051707,GO:0052173,GO:0052200,GO:0052564,GO:0052572,GO:0071944,GO:0075136	-	-	-	-	-	-	-	-	-	-	DUF1876
lcl|NC_009525.1_cds_WP_003916850.1_1821	419947.MRA_1750	0.0	1026.0	COG0659@1|root,COG0659@2|Bacteria,2GJCB@201174|Actinobacteria,236K7@1762|Mycobacteriaceae	201174|Actinobacteria	P	Sulfate transporter	-	GO:0000103,GO:0000166,GO:0003333,GO:0003674,GO:0005215,GO:0005310,GO:0005326,GO:0005342,GO:0005488,GO:0005575,GO:0005623,GO:0005886,GO:0005887,GO:0006790,GO:0006810,GO:0006811,GO:0006820,GO:0006835,GO:0006836,GO:0006855,GO:0006865,GO:0008150,GO:0008152,GO:0008272,GO:0008509,GO:0008514,GO:0009987,GO:0015075,GO:0015103,GO:0015116,GO:0015138,GO:0015141,GO:0015171,GO:0015172,GO:0015179,GO:0015183,GO:…	-	ko:K03321	-	-	-	-	ko00000,ko02000	2.A.53.3	-	-	STAS,Sulfate_transp
lcl|NC_009525.1_cds_WP_003898996.1_1823	419947.MRA_1752	1.97e-53	167.0	COG3742@1|root,COG3742@2|Bacteria	2|Bacteria	L	Toxic component of a toxin-antitoxin (TA) module. An RNase	vapC	-	-	ko:K19686	-	-	-	-	ko00000,ko01000,ko02048	-	-	-	PIN
lcl|NC_009525.1_cds_WP_003898997.1_1824	419947.MRA_1753	2.42e-187	519.0	28MQW@1|root,32WFA@2|Bacteria,2I50D@201174|Actinobacteria,23F8X@1762|Mycobacteriaceae	201174|Actinobacteria	-	-	-	-	-	-	-	-	-	-	-	-	-	-	-
lcl|NC_009525.1_cds_WP_003898998.1_1825	419947.MRA_1754	0.0	1080.0	COG0515@1|root,COG1651@1|root,COG0515@2|Bacteria,COG1651@2|Bacteria,2GNXG@201174|Actinobacteria,23296@1762|Mycobacteriaceae	201174|Actinobacteria	KLT	serine threonine protein kinase	pknE	GO:0003674,GO:0003824,GO:0004672,GO:0004674,GO:0005575,GO:0005576,GO:0006464,GO:0006468,GO:0006793,GO:0006796,GO:0006807,GO:0006950,GO:0008150,GO:0008152,GO:0009889,GO:0009890,GO:0009892,GO:0009987,GO:0010565,GO:0016301,GO:0016310,GO:0016740,GO:0016772,GO:0016773,GO:0019216,GO:0019217,GO:0019222,GO:0019538,GO:0031323,GO:0031324,GO:0031326,GO:0031327,GO:0036211,GO:0042304,GO:0043085,GO:0043086,GO:…	2.7.11.1	ko:K08884,ko:K12132	-	-	-	-	ko00000,ko01000,ko01001	-	-	-	Pkinase,Thioredoxin_4
lcl|NC_009525.1_cds_WP_003898999.1_1827	419947.MRA_1756	3.91e-154	431.0	COG1443@1|root,COG1443@2|Bacteria,2GM26@201174|Actinobacteria,238KQ@1762|Mycobacteriaceae	201174|Actinobacteria	I	Catalyzes the 1,3-allylic rearrangement of the homoallylic substrate isopentenyl (IPP) to its highly electrophilic allylic isomer, dimethylallyl diphosphate (DMAPP)	idi	GO:0003674,GO:0003824,GO:0004452,GO:0005575,GO:0005622,GO:0005623,GO:0005737,GO:0006629,GO:0006644,GO:0006720,GO:0006793,GO:0006796,GO:0008150,GO:0008152,GO:0008299,GO:0008610,GO:0008654,GO:0009058,GO:0009240,GO:0009987,GO:0016853,GO:0016860,GO:0016863,GO:0019637,GO:0044237,GO:0044238,GO:0044249,GO:0044255,GO:0044424,GO:0044464,GO:0046490,GO:0071704,GO:0090407,GO:1901576	5.3.3.2	ko:K01823	ko00900,ko01100,ko01110,ko01130,map00900,map01100,map01110,map01130	M00095,M00096,M00364,M00365,M00366,M00367	R01123	RC00455	ko00000,ko00001,ko00002,ko01000	-	-	iNJ661.Rv1745c	NUDIX
lcl|NC_009525.1_cds_WP_003899000.1_1828	419947.MRA_1757	0.0	868.0	COG0515@1|root,COG0515@2|Bacteria,2GNT2@201174|Actinobacteria,2334C@1762|Mycobacteriaceae	201174|Actinobacteria	KLT	serine threonine protein kinase	pknF_3	GO:0000921,GO:0001558,GO:0003674,GO:0003824,GO:0004672,GO:0004674,GO:0005575,GO:0005622,GO:0005623,GO:0005737,GO:0005829,GO:0005886,GO:0005887,GO:0006464,GO:0006468,GO:0006793,GO:0006796,GO:0006807,GO:0006996,GO:0007010,GO:0008150,GO:0008152,GO:0009889,GO:0009890,GO:0009892,GO:0009987,GO:0010827,GO:0016020,GO:0016021,GO:0016043,GO:0016301,GO:0016310,GO:0016740,GO:0016772,GO:0016773,GO:0019216,GO:…	2.7.11.1	ko:K08884,ko:K12132	-	-	-	-	ko00000,ko01000,ko01001	-	-	-	Pkinase
lcl|NC_009525.1_cds_WP_003899001.1_1830	419947.MRA_1759	2.83e-148	419.0	2ERCX@1|root,33IYJ@2|Bacteria,2IJT0@201174|Actinobacteria,236AB@1762|Mycobacteriaceae	201174|Actinobacteria	-	-	-	-	-	-	-	-	-	-	-	-	-	-	-
lcl|NC_009525.1_cds_WP_003408558.1_1832	419947.MRA_1761	0.0	1067.0	COG0318@1|root,COG0318@2|Bacteria,2GKZ6@201174|Actinobacteria,233SH@1762|Mycobacteriaceae	201174|Actinobacteria	IQ	Activates fatty acids by binding to coenzyme A	fadD1	-	-	ko:K00666	-	-	-	-	ko00000,ko01000,ko01004	-	-	-	AMP-binding,AMP-binding_C
lcl|NC_009525.1_cds_WP_010886126.1_1835	419947.MRA_1764	3.62e-140	455.0	COG5263@1|root,COG5651@1|root,COG5263@2|Bacteria,COG5651@2|Bacteria,2HMEV@201174|Actinobacteria,233CN@1762|Mycobacteriaceae	201174|Actinobacteria	N	repeat protein	-	GO:0008150,GO:0040007	-	-	-	-	-	-	-	-	-	-	PPE,Pentapeptide_2
lcl|NC_009525.1_cds_WP_003408743.1_1855	419947.MRA_1783	8.01e-77	229.0	COG0599@1|root,COG0599@2|Bacteria,2IRPW@201174|Actinobacteria,239WZ@1762|Mycobacteriaceae	201174|Actinobacteria	O	Antioxidant protein with alkyl hydroperoxidase activity. Required for the reduction of the AhpC active site cysteine residues and for the regeneration of the AhpC enzyme activity	-	-	-	-	-	-	-	-	-	-	-	-	CMD
lcl|NC_009525.1_cds_WP_003904700.1_1857	419947.MRA_1785	1.11e-300	820.0	COG3616@1|root,COG3616@2|Bacteria,2GJMB@201174|Actinobacteria,234V5@1762|Mycobacteriaceae	201174|Actinobacteria	E	Alanine racemase, N-terminal domain	-	-	-	-	-	-	-	-	-	-	-	-	Ala_racemase_N
lcl|NC_009525.1_cds_WP_003408749.1_1859	419947.MRA_1787	3.79e-315	857.0	COG0277@1|root,COG0277@2|Bacteria,2GJ33@201174|Actinobacteria,2379P@1762|Mycobacteriaceae	201174|Actinobacteria	C	D-arabinono-1,4-lactone oxidase	-	GO:0003674,GO:0003824,GO:0005575,GO:0005618,GO:0005623,GO:0005886,GO:0005975,GO:0005996,GO:0006082,GO:0006732,GO:0006766,GO:0006767,GO:0008150,GO:0008152,GO:0009058,GO:0009108,GO:0009110,GO:0009987,GO:0016020,GO:0016051,GO:0016053,GO:0016491,GO:0016627,GO:0016632,GO:0019752,GO:0019852,GO:0019853,GO:0030312,GO:0042364,GO:0043436,GO:0044237,GO:0044238,GO:0044249,GO:0044281,GO:0044283,GO:0044464,GO:…	1.1.3.8	ko:K00103	ko00053,ko01100,map00053,map01100	M00129	R00647,R03184,R10053	RC00195,RC00346,RC00869	ko00000,ko00001,ko00002,ko01000	-	-	-	ALO,FAD_binding_4
lcl|NC_009525.1_cds_WP_003408754.1_1861	419947.MRA_1789	2.88e-167	468.0	COG1414@1|root,COG1414@2|Bacteria,2GJUA@201174|Actinobacteria,234PW@1762|Mycobacteriaceae	201174|Actinobacteria	K	Transcriptional regulator	-	-	-	-	-	-	-	-	-	-	-	-	HTH_IclR,IclR
lcl|NC_009525.1_cds_WP_003899017.1_1862	419947.MRA_1790	0.0	919.0	COG0277@1|root,COG0277@2|Bacteria,2GMAQ@201174|Actinobacteria,234VM@1762|Mycobacteriaceae	201174|Actinobacteria	C	FAD binding domain	-	-	-	-	-	-	-	-	-	-	-	-	FAD_binding_4
lcl|NC_009525.1_cds_WP_003899018.1_1864	419947.MRA_1792	3.12e-129	367.0	COG1309@1|root,COG1309@2|Bacteria,2IFC4@201174|Actinobacteria,239CF@1762|Mycobacteriaceae	201174|Actinobacteria	K	Transcriptional regulator	-	-	-	-	-	-	-	-	-	-	-	-	TetR_N
lcl|NC_009525.1_cds_WP_003408781.1_1867	419947.MRA_1795	0.0	1008.0	2ANPG@1|root,31DP1@2|Bacteria,2ICB4@201174|Actinobacteria,233KZ@1762|Mycobacteriaceae	201174|Actinobacteria	S	Domain of unknown function (DUF4407)	-	-	-	-	-	-	-	-	-	-	-	-	DUF4407
lcl|NC_009525.1_cds_WP_003408792.1_1868	419947.MRA_1795A	1.8e-124	355.0	2ESGC@1|root,33K12@2|Bacteria,2I8M9@201174|Actinobacteria,23561@1762|Mycobacteriaceae	201174|Actinobacteria	-	-	-	-	-	-	-	-	-	-	-	-	-	-	-
lcl|NC_009525.1_cds_WP_003899021.1_1870	419947.MRA_1797	0.0	994.0	COG3266@1|root,COG3266@2|Bacteria,2GP1Z@201174|Actinobacteria,23351@1762|Mycobacteriaceae	201174|Actinobacteria	S	secretion protein EccB	eccB	GO:0005575,GO:0005576,GO:0005618,GO:0005623,GO:0005886,GO:0016020,GO:0030312,GO:0044464,GO:0071944	-	-	-	-	-	-	-	-	-	-	T7SS_ESX1_EccB
lcl|NC_009525.1_cds_WP_003408799.1_1871	419947.MRA_1798	0.0	2784.0	COG1674@1|root,COG1674@2|Bacteria,2GJBR@201174|Actinobacteria,234CG@1762|Mycobacteriaceae	201174|Actinobacteria	D	Secretion protein	eccCa	GO:0005575,GO:0005618,GO:0005623,GO:0005886,GO:0016020,GO:0030312,GO:0044464,GO:0071944	-	ko:K03466	-	-	-	-	ko00000,ko03036	3.A.12	-	-	FtsK_SpoIIIE
lcl|NC_009525.1_cds_WP_003408802.1_1872	419947.MRA_1799	2.02e-290	792.0	COG2124@1|root,COG2124@2|Bacteria,2HSPE@201174|Actinobacteria,232YX@1762|Mycobacteriaceae	201174|Actinobacteria	C	cytochrome P-450	cyp143	-	-	-	-	-	-	-	-	-	-	-	p450
lcl|NC_009525.1_cds_WP_003408805.1_1877	419947.MRA_1804	2.78e-232	641.0	COG5651@1|root,COG5651@2|Bacteria,2ICPF@201174|Actinobacteria,2363X@1762|Mycobacteriaceae	201174|Actinobacteria	N	Polymorphic PE/PPE proteins C terminal	-	-	-	-	-	-	-	-	-	-	-	-	PE_PPE_C,PPE
lcl|NC_009525.1_cds_WP_003408846.1_1881	419947.MRA_1807	9.23e-215	593.0	2ANCJ@1|root,31DB5@2|Bacteria,2IAK2@201174|Actinobacteria,233Z2@1762|Mycobacteriaceae	201174|Actinobacteria	S	EspG family	espG5	GO:0005575,GO:0005618,GO:0005623,GO:0005886,GO:0016020,GO:0030312,GO:0044464,GO:0071944	-	-	-	-	-	-	-	-	-	-	ESX-1_EspG
lcl|NC_009525.1_cds_WP_003900411.1_1882	419947.MRA_1808	8.26e-317	868.0	28MNM@1|root,2ZAY5@2|Bacteria,2GNDI@201174|Actinobacteria,232V2@1762|Mycobacteriaceae	201174|Actinobacteria	S	Type VII secretion integral membrane protein EccD	eccD5	GO:0005575,GO:0005623,GO:0005886,GO:0016020,GO:0044464,GO:0071944	-	-	-	-	-	-	-	-	-	-	YukD
lcl|NC_009525.1_cds_WP_003408854.1_1883	419947.MRA_1809	0.0	1051.0	COG1404@1|root,COG1404@2|Bacteria,2GIRE@201174|Actinobacteria,234HB@1762|Mycobacteriaceae	201174|Actinobacteria	O	Peptidase S8	mycP5	GO:0005575,GO:0005576	-	ko:K14743	-	-	-	-	ko00000,ko01000,ko01002,ko03110	-	-	-	Peptidase_S8
lcl|NC_009525.1_cds_WP_003408868.1_1885	419947.MRA_1811	0.0	1181.0	COG0457@1|root,COG0464@1|root,COG0457@2|Bacteria,COG0464@2|Bacteria,2GJWA@201174|Actinobacteria,233R6@1762|Mycobacteriaceae	201174|Actinobacteria	O	Type VII secretion	eccA5	GO:0005575,GO:0005623,GO:0005886,GO:0016020,GO:0044464,GO:0071944	-	-	-	-	-	-	-	-	-	-	AAA,TPR_16
lcl|NC_009525.1_cds_WP_003409061.1_1889	419947.MRA_1815	2.67e-294	808.0	COG5651@1|root,COG5651@2|Bacteria,2HUJ2@201174|Actinobacteria,232D9@1762|Mycobacteriaceae	201174|Actinobacteria	N	Polymorphic PE/PPE proteins C terminal	-	-	-	-	-	-	-	-	-	-	-	-	PE_PPE_C,PPE
lcl|NC_009525.1_cds_WP_003910446.1_1890	419947.MRA_1816	3.56e-97	318.0	COG3391@1|root,COG3391@2|Bacteria,2IEKI@201174|Actinobacteria,236F5@1762|Mycobacteriaceae	201174|Actinobacteria	S	PE family	-	-	-	-	-	-	-	-	-	-	-	-	PE
lcl|NC_009525.1_cds_WP_003916893.1_1893	419947.MRA_1819	5.5e-252	696.0	COG5651@1|root,COG5651@2|Bacteria,2IA22@201174|Actinobacteria,234EP@1762|Mycobacteriaceae	201174|Actinobacteria	N	Polymorphic PE/PPE proteins C terminal	-	-	-	-	-	-	-	-	-	-	-	-	PE_PPE_C,PPE
lcl|NC_009525.1_cds_WP_003906680.1_1894	419947.MRA_1820	3.14e-261	719.0	COG5651@1|root,COG5651@2|Bacteria,2I9JM@201174|Actinobacteria,23750@1762|Mycobacteriaceae	201174|Actinobacteria	N	Polymorphic PE/PPE proteins C terminal	-	-	-	-	-	-	-	-	-	-	-	-	PE_PPE_C,PPE
lcl|NC_009525.1_cds_WP_003911666.1_1895	419947.MRA_1821	8.91e-307	840.0	COG5651@1|root,COG5651@2|Bacteria,2HUJ2@201174|Actinobacteria,232D9@1762|Mycobacteriaceae	201174|Actinobacteria	N	Polymorphic PE/PPE proteins C terminal	-	-	-	-	-	-	-	-	-	-	-	-	PE_PPE_C,PPE
lcl|NC_009525.1_cds_WP_003899032.1_1897	419947.MRA_1823	6.35e-164	459.0	COG1285@1|root,COG1285@2|Bacteria,2GJF0@201174|Actinobacteria,234H9@1762|Mycobacteriaceae	201174|Actinobacteria	S	thought to be involved in Mg2 transport (import) may act as an accessory protein for MgtB so mediating magnesium influx into the cytosol catalytic activity ATP H(2)O mg(2 )(out) ADP phosphate mg(2 )(in)	mgtC	-	-	ko:K07507	-	-	-	-	ko00000,ko02000	9.B.20	-	-	MgtC
lcl|NC_009525.1_cds_WP_003916895.1_1898	419947.MRA_1824	2.64e-285	780.0	COG1252@1|root,COG1252@2|Bacteria,2GKC0@201174|Actinobacteria,236R6@1762|Mycobacteriaceae	201174|Actinobacteria	C	NADH dehydrogenase	-	GO:0005575,GO:0005576,GO:0005623,GO:0005886,GO:0016020,GO:0044464,GO:0071944	1.6.99.3	ko:K03885	ko00190,map00190	-	-	-	ko00000,ko00001,ko01000	-	-	-	Pyr_redox_2
lcl|NC_009525.1_cds_WP_003899033.1_1900	419947.MRA_1826	3.76e-229	630.0	COG3000@1|root,COG3000@2|Bacteria,2GMF0@201174|Actinobacteria,2340C@1762|Mycobacteriaceae	201174|Actinobacteria	I	sterol desaturase	erg3	GO:0003674,GO:0003824,GO:0004497,GO:0006629,GO:0006643,GO:0008150,GO:0008152,GO:0009987,GO:0016491,GO:0016705,GO:0016714,GO:0044237,GO:0044238,GO:0044255,GO:0050479,GO:0055114,GO:0071704	-	-	-	-	-	-	-	-	-	-	FA_hydroxylase
lcl|NC_009525.1_cds_WP_003900416.1_1907	419947.MRA_1831	0.0	1237.0	COG4178@1|root,COG4178@2|Bacteria,2IAEM@201174|Actinobacteria,232RW@1762|Mycobacteriaceae	201174|Actinobacteria	S	ABC transporter	bacA	GO:0005575,GO:0005576,GO:0005623,GO:0005886,GO:0005887,GO:0008150,GO:0009605,GO:0009607,GO:0016020,GO:0016021,GO:0031224,GO:0031226,GO:0043207,GO:0044403,GO:0044419,GO:0044425,GO:0044459,GO:0044464,GO:0050896,GO:0051701,GO:0051704,GO:0051707,GO:0052173,GO:0052200,GO:0052564,GO:0052572,GO:0071944,GO:0075136	-	ko:K02471	ko02010,map02010	-	-	-	ko00000,ko00001,ko02000	3.A.1.203.11,3.A.1.203.4	-	-	ABC_membrane_2,ABC_tran
lcl|NC_009525.1_cds_WP_003911668.1_1909	419947.MRA_1833	0.0	1513.0	COG0653@1|root,COG0653@2|Bacteria,2GKZE@201174|Actinobacteria,234Y4@1762|Mycobacteriaceae	201174|Actinobacteria	U	Part of the Sec protein translocase complex. Interacts with the SecYEG preprotein conducting channel. Has a central role in coupling the hydrolysis of ATP to the transfer of proteins into and across the cell membrane, serving as an ATP-driven molecular motor driving the stepwise translocation of polypeptide chains across the membrane	secA2	GO:0000166,GO:0003674,GO:0003824,GO:0005215,GO:0005488,GO:0005524,GO:0005575,GO:0005618,GO:0005622,GO:0005623,GO:0005737,GO:0005829,GO:0005886,GO:0005887,GO:0006810,GO:0008104,GO:0008144,GO:0008150,GO:0008320,GO:0008565,GO:0009405,GO:0009605,GO:0009607,GO:0015031,GO:0015399,GO:0015405,GO:0015440,GO:0015450,GO:0015462,GO:0015833,GO:0016020,GO:0016021,GO:0016462,GO:0016787,GO:0016817,GO:0016818,GO:…	-	ko:K03070	ko02024,ko03060,ko03070,map02024,map03060,map03070	M00335	-	-	ko00000,ko00001,ko00002,ko02044	3.A.5.1,3.A.5.10,3.A.5.2,3.A.5.4	-	-	SecA_DEAD,SecA_PP_bind,SecA_SW
lcl|NC_009525.1_cds_WP_003901262.1_1911	419947.MRA_1835	5.46e-206	571.0	COG3879@1|root,COG3879@2|Bacteria,2GMS5@201174|Actinobacteria,234FX@1762|Mycobacteriaceae	201174|Actinobacteria	S	Bacterial protein of unknown function (DUF881)	-	GO:0005575,GO:0005623,GO:0005886,GO:0005887,GO:0016020,GO:0016021,GO:0031224,GO:0031226,GO:0044425,GO:0044459,GO:0044464,GO:0071944	-	-	-	-	-	-	-	-	-	-	DUF881
lcl|NC_009525.1_cds_WP_003899040.1_1914	419947.MRA_1838	1.31e-89	263.0	COG0509@1|root,COG0509@2|Bacteria,2IKN2@201174|Actinobacteria,239DN@1762|Mycobacteriaceae	201174|Actinobacteria	E	The glycine cleavage system catalyzes the degradation of glycine. The H protein shuttles the methylamine group of glycine from the P protein to the T protein	gcvH	-	-	ko:K02437	ko00260,ko00630,ko01100,ko01110,ko01130,ko01200,map00260,map00630,map01100,map01110,map01130,map01200	M00532	R01221	RC00022,RC02834	ko00000,ko00001,ko00002	-	-	iNJ661.Rv1826	GCV_H
lcl|NC_009525.1_cds_WP_003900418.1_1919	419947.MRA_1843	0.0	1858.0	COG0403@1|root,COG1003@1|root,COG0403@2|Bacteria,COG1003@2|Bacteria,2GJ11@201174|Actinobacteria,233DG@1762|Mycobacteriaceae	201174|Actinobacteria	E	The glycine cleavage system catalyzes the degradation of glycine. The P protein binds the alpha-amino group of glycine through its pyridoxal phosphate cofactor	gcvP	GO:0005575,GO:0005618,GO:0005623,GO:0005886,GO:0008150,GO:0016020,GO:0030312,GO:0040007,GO:0044464,GO:0071944	1.4.4.2	ko:K00281,ko:K00283	ko00260,ko00630,ko01100,ko01110,ko01130,ko01200,map00260,map00630,map01100,map01110,map01130,map01200	M00532	R01221,R03425	RC00022,RC00929,RC02834,RC02880	ko00000,ko00001,ko00002,ko01000	-	-	-	GDC-P
lcl|NC_009525.1_cds_WP_003409258.1_1922	419947.MRA_1846	0.0	1319.0	COG2936@1|root,COG2936@2|Bacteria,2GK8B@201174|Actinobacteria,235H0@1762|Mycobacteriaceae	201174|Actinobacteria	S	peptidase S15	-	GO:0005575,GO:0005623,GO:0005886,GO:0016020,GO:0044464,GO:0071944	-	ko:K06978	-	-	-	-	ko00000	-	-	-	PepX_C,Peptidase_S15
lcl|NC_009525.1_cds_WP_003901265.1_1923	419947.MRA_1847	0.0	1310.0	COG2304@1|root,COG2304@2|Bacteria,2GUB3@201174|Actinobacteria,232G3@1762|Mycobacteriaceae	201174|Actinobacteria	S	von willebrand factor type a	-	GO:0005575,GO:0005576,GO:0005618,GO:0005623,GO:0005886,GO:0005887,GO:0016020,GO:0016021,GO:0030312,GO:0031224,GO:0031226,GO:0044425,GO:0044459,GO:0044464,GO:0071944	-	-	-	-	-	-	-	-	-	-	SBP_bac_11,VWA,VWA_2
lcl|NC_009525.1_cds_WP_003904712.1_1927	419947.MRA_1851	3.58e-93	300.0	COG0657@1|root,COG0657@2|Bacteria,2H3MX@201174|Actinobacteria,23CSW@1762|Mycobacteriaceae	201174|Actinobacteria	I	PE family	-	-	-	-	-	-	-	-	-	-	-	-	PE
lcl|NC_009525.1_cds_WP_003899046.1_1929	419947.MRA_1853	1.01e-310	848.0	COG1253@1|root,COG1253@2|Bacteria,2GKN5@201174|Actinobacteria,232YI@1762|Mycobacteriaceae	201174|Actinobacteria	S	Hemolysins and related proteins containing CBS domains	tlyC	-	-	-	-	-	-	-	-	-	-	-	CBS,CorC_HlyC,DUF21
lcl|NC_009525.1_cds_WP_003902189.1_1930	419947.MRA_1854	0.0	932.0	COG0516@1|root,COG0517@1|root,COG0516@2|Bacteria,COG0517@2|Bacteria,2GNDC@201174|Actinobacteria,234UT@1762|Mycobacteriaceae	201174|Actinobacteria	F	IMP dehydrogenase GMP reductase	guaB1	GO:0005575,GO:0005622,GO:0005623,GO:0005737,GO:0005829,GO:0005886,GO:0016020,GO:0044424,GO:0044444,GO:0044464,GO:0071944	1.1.1.205	ko:K00088	ko00230,ko00983,ko01100,ko01110,map00230,map00983,map01100,map01110	M00050	R01130,R08240	RC00143,RC02207	ko00000,ko00001,ko00002,ko01000,ko04147	-	-	-	CBS,IMPDH
lcl|NC_009525.1_cds_WP_003409298.1_1932	419947.MRA_1856	2.46e-202	563.0	COG0501@1|root,COG0501@2|Bacteria,2GM27@201174|Actinobacteria,234BJ@1762|Mycobacteriaceae	201174|Actinobacteria	M	Zn-dependent protease with chaperone function	-	-	-	-	-	-	-	-	-	-	-	-	Peptidase_M48
lcl|NC_009525.1_cds_WP_003899048.1_1934	419947.MRA_1858	1.39e-96	281.0	COG2050@1|root,COG2050@2|Bacteria,2IKTU@201174|Actinobacteria,239I5@1762|Mycobacteriaceae	201174|Actinobacteria	Q	PFAM thioesterase superfamily	-	-	-	-	-	-	-	-	-	-	-	-	4HBT
lcl|NC_009525.1_cds_WP_003899049.1_1937	419947.MRA_1861	0.0	1152.0	COG0804@1|root,COG0804@2|Bacteria,2GM7X@201174|Actinobacteria,236C1@1762|Mycobacteriaceae	201174|Actinobacteria	E	Belongs to the metallo-dependent hydrolases superfamily. Urease alpha subunit family	ureC	GO:0008150,GO:0040007	3.5.1.5	ko:K01428	ko00220,ko00230,ko00791,ko01100,ko01120,ko05120,map00220,map00230,map00791,map01100,map01120,map05120	-	R00131	RC02798,RC02806	ko00000,ko00001,ko01000	-	-	iNJ661.Rv1850	Amidohydro_1,Urease_alpha
lcl|NC_009525.1_cds_WP_003409313.1_1939	419947.MRA_1863	2.91e-155	436.0	COG0378@1|root,COG0378@2|Bacteria,2GNUV@201174|Actinobacteria,233AW@1762|Mycobacteriaceae	201174|Actinobacteria	KO	Facilitates the functional incorporation of the urease nickel metallocenter. This process requires GTP hydrolysis, probably effectuated by UreG	ureG	GO:0003674,GO:0003824,GO:0003924,GO:0016462,GO:0016787,GO:0016817,GO:0016818,GO:0017111	-	ko:K03189	-	-	-	-	ko00000	-	-	-	cobW
lcl|NC_009525.1_cds_WP_003409317.1_1941	419947.MRA_1865	0.0	883.0	COG1252@1|root,COG1252@2|Bacteria,2GJFE@201174|Actinobacteria,233I8@1762|Mycobacteriaceae	201174|Actinobacteria	C	NADH dehydrogenase	ndh	-	1.6.99.3	ko:K03885	ko00190,map00190	-	-	-	ko00000,ko00001,ko01000	-	-	-	Pyr_redox_2
lcl|NC_009525.1_cds_WP_003409329.1_1945	419947.MRA_1869	2.25e-172	483.0	COG4149@1|root,COG4149@2|Bacteria,2GJFB@201174|Actinobacteria,236EA@1762|Mycobacteriaceae	201174|Actinobacteria	P	ABC transporter	modB	GO:0005575,GO:0005623,GO:0005886,GO:0016020,GO:0044464,GO:0071944	3.6.3.29	ko:K02017,ko:K02018	ko02010,map02010	M00189	-	-	ko00000,ko00001,ko00002,ko01000,ko02000	3.A.1.8	-	-	ABC_tran,BPD_transp_1,TOBE
lcl|NC_009525.1_cds_WP_003899051.1_1946	419947.MRA_1870	1.57e-259	712.0	COG1118@1|root,COG1118@2|Bacteria,2I2RQ@201174|Actinobacteria,2342T@1762|Mycobacteriaceae	201174|Actinobacteria	P	Part of the ABC transporter complex ModABC involved in molybdenum import. Responsible for energy coupling to the transport system	modC	-	3.6.3.29	ko:K02017	ko02010,map02010	M00189	-	-	ko00000,ko00001,ko00002,ko01000,ko02000	3.A.1.8	-	-	ABC_tran,TOBE
lcl|NC_009525.1_cds_WP_003911690.1_1947	419947.MRA_1871	5.54e-143	413.0	2FEYE@1|root,346X3@2|Bacteria,2GN2Q@201174|Actinobacteria,23504@1762|Mycobacteriaceae	201174|Actinobacteria	S	PFAM Fibronectin-attachment	apa	GO:0002682,GO:0002684,GO:0005575,GO:0005576,GO:0006950,GO:0007154,GO:0008150,GO:0009267,GO:0009605,GO:0009607,GO:0009987,GO:0009991,GO:0031667,GO:0031668,GO:0031669,GO:0033554,GO:0035821,GO:0042594,GO:0043207,GO:0044003,GO:0044403,GO:0044419,GO:0048518,GO:0048583,GO:0048584,GO:0050776,GO:0050778,GO:0050789,GO:0050896,GO:0051701,GO:0051704,GO:0051707,GO:0051716,GO:0051817,GO:0052031,GO:0052173,GO:…	-	-	-	-	-	-	-	-	-	-	FAP
lcl|NC_009525.1_cds_WP_003409355.1_1952	419947.MRA_1876	3.54e-196	545.0	COG1028@1|root,COG1028@2|Bacteria,2I41V@201174|Actinobacteria,23F6X@1762|Mycobacteriaceae	201174|Actinobacteria	IQ	Belongs to the short-chain dehydrogenases reductases (SDR) family	-	-	-	-	-	-	-	-	-	-	-	-	adh_short
lcl|NC_009525.1_cds_WP_003409362.1_1954	419947.MRA_1878	0.0	996.0	COG0183@1|root,COG0183@2|Bacteria,2I3PP@201174|Actinobacteria,232HJ@1762|Mycobacteriaceae	201174|Actinobacteria	I	Catalyzes the synthesis of acetoacetyl coenzyme A from two molecules of acetyl coenzyme A. It can also act as a thiolase, catalyzing the reverse reaction and generating two-carbon units from the four-carbon product of fatty acid oxidation	-	-	2.3.1.9	ko:K00626	ko00071,ko00072,ko00280,ko00310,ko00362,ko00380,ko00620,ko00630,ko00640,ko00650,ko00720,ko00900,ko01100,ko01110,ko01120,ko01130,ko01200,ko01212,ko02020,map00071,map00072,map00280,map00310,map00362,map00380,map00620,map00630,map00640,map00650,map00720,map00900,map01100,map01110,map01120,map01130,map01200,map01212,map02020	M00088,M00095,M00373,M00374,M00375	R00238,R01177	RC00004,RC00326	ko00000,ko00001,ko00002,ko01000,ko04147	-	-	-	-
lcl|NC_009525.1_cds_WP_003899055.1_1956	419947.MRA_1880	3.28e-296	808.0	COG0446@1|root,COG0446@2|Bacteria,2GJKT@201174|Actinobacteria,23555@1762|Mycobacteriaceae	201174|Actinobacteria	S	Reductase C-terminal	-	-	1.18.1.3	ko:K00529	ko00071,ko00360,ko01120,ko01220,map00071,map00360,map01120,map01220	M00545	R02000,R06782,R06783	RC00098	br01602,ko00000,ko00001,ko00002,ko01000	-	-	-	Pyr_redox_2,Reductase_C
lcl|NC_009525.1_cds_WP_003917541.1_1957	419947.MRA_1881	9.24e-137	388.0	COG0177@1|root,COG0177@2|Bacteria,2GNYB@201174|Actinobacteria,2369Q@1762|Mycobacteriaceae	201174|Actinobacteria	L	DNA repair enzyme that has both DNA N-glycosylase activity and AP-lyase activity. The DNA N-glycosylase activity releases various damaged pyrimidines from DNA by cleaving the N- glycosidic bond, leaving an AP (apurinic apyrimidinic) site. The AP-lyase activity cleaves the phosphodiester bond 3' to the AP site by a beta-elimination, leaving a 3'-terminal unsaturated sugar and a product with a term…	-	-	-	-	-	-	-	-	-	-	-	-	-
lcl|NC_009525.1_cds_WP_003409380.1_1958	419947.MRA_1882	2.21e-90	264.0	COG1902@1|root,COG1902@2|Bacteria,2IHUT@201174|Actinobacteria,239AX@1762|Mycobacteriaceae	201174|Actinobacteria	C	F420H(2)-dependent quinone reductase	-	-	-	-	-	-	-	-	-	-	-	-	F420H2_quin_red
lcl|NC_009525.1_cds_WP_003899057.1_1959	419947.MRA_1883	3.46e-304	828.0	COG1304@1|root,COG1304@2|Bacteria,2GJA5@201174|Actinobacteria,233ST@1762|Mycobacteriaceae	201174|Actinobacteria	C	Dehydrogenase	lldD2	GO:0005575,GO:0005618,GO:0005623,GO:0005886,GO:0016020,GO:0030312,GO:0044464,GO:0071944	1.1.2.3,1.1.3.15	ko:K00101,ko:K00104	ko00620,ko00630,ko01100,ko01110,ko01120,ko01130,map00620,map00630,map01100,map01110,map01120,map01130	-	R00196,R00475	RC00042,RC00044	ko00000,ko00001,ko01000	-	-	iNJ661.Rv1872c	FMN_dh
lcl|NC_009525.1_cds_WP_003409385.1_1960	419947.MRA_1884	6.54e-102	295.0	COG5579@1|root,COG5579@2|Bacteria,2IM9J@201174|Actinobacteria,239PD@1762|Mycobacteriaceae	201174|Actinobacteria	S	Protein of unknown function (DUF1810)	-	-	-	-	-	-	-	-	-	-	-	-	DUF1810
lcl|NC_009525.1_cds_WP_003899058.1_1961	419947.MRA_1885	2.43e-162	454.0	28KNT@1|root,2ZA6Z@2|Bacteria,2GNXC@201174|Actinobacteria,233P9@1762|Mycobacteriaceae	201174|Actinobacteria	S	EthD domain	-	-	-	-	-	-	-	-	-	-	-	-	EthD
lcl|NC_009525.1_cds_WP_003899060.1_1965	419947.MRA_1888	0.0	1299.0	COG0477@1|root,COG1846@1|root,COG0477@2|Bacteria,COG1846@2|Bacteria,2GJ09@201174|Actinobacteria,23541@1762|Mycobacteriaceae	201174|Actinobacteria	EGP	Major facilitator superfamily	-	GO:0003674,GO:0005215,GO:0005575,GO:0005623,GO:0005886,GO:0005887,GO:0006810,GO:0008150,GO:0016020,GO:0016021,GO:0022857,GO:0031224,GO:0031226,GO:0044425,GO:0044459,GO:0044464,GO:0051179,GO:0051234,GO:0055085,GO:0071944	-	-	-	-	-	-	-	-	-	-	MFS_1
lcl|NC_009525.1_cds_WP_003409401.1_1966	419947.MRA_1889	0.0	875.0	COG0174@1|root,COG0174@2|Bacteria,2GJ83@201174|Actinobacteria,23399@1762|Mycobacteriaceae	201174|Actinobacteria	E	glutamine synthetase	glnA3	-	6.3.1.2	ko:K01915	ko00220,ko00250,ko00630,ko00910,ko01100,ko01120,ko01230,ko02020,ko04217,ko04724,ko04727,map00220,map00250,map00630,map00910,map01100,map01120,map01230,map02020,map04217,map04724,map04727	-	R00253	RC00010,RC02798	ko00000,ko00001,ko01000,ko04147	-	-	-	Gln-synt_C,Gln-synt_N_2
lcl|NC_009525.1_cds_WP_003899061.1_1967	419947.MRA_1890	1.06e-282	771.0	COG2159@1|root,COG2159@2|Bacteria,2GKCJ@201174|Actinobacteria,233HG@1762|Mycobacteriaceae	201174|Actinobacteria	S	amidohydrolase	-	-	-	ko:K07045	-	-	-	-	ko00000	-	-	-	Amidohydro_2
lcl|NC_009525.1_cds_WP_003899064.1_1973	419947.MRA_1896	3.32e-135	383.0	COG1605@1|root,COG1605@2|Bacteria,2IEAG@201174|Actinobacteria,2397C@1762|Mycobacteriaceae	201174|Actinobacteria	M	Catalyzes the Claisen rearrangement of chorismate to prephenate	-	GO:0003674,GO:0003824,GO:0004106,GO:0005575,GO:0005576,GO:0006082,GO:0008150,GO:0008152,GO:0009987,GO:0016853,GO:0016866,GO:0019752,GO:0043436,GO:0043648,GO:0044237,GO:0044281,GO:0046417,GO:0071704	5.4.99.5	ko:K04093	ko00400,ko01100,ko01110,ko01130,ko01230,map00400,map01100,map01110,map01130,map01230	M00024,M00025	R01715	RC03116	ko00000,ko00001,ko00002,ko01000	-	-	-	CM_2
lcl|NC_009525.1_cds_WP_003409456.1_1974	419947.MRA_1897	4.22e-244	669.0	COG0627@1|root,COG0627@2|Bacteria,2GJX4@201174|Actinobacteria,232KQ@1762|Mycobacteriaceae	201174|Actinobacteria	S	fibronectin, a large adhesive glycoprotein, which facilitates the attachment of M.tuberculosis to murine alveolar macrophages (AMs). They also help to maintain the integrity of the cell wall by catalyzing the transfer of mycolic acids to cell wall arabinogalactan, and through the synthesis of alpha,alpha-trehalose dimycolate (TDM, cord factor). They catalyze the transfer of a mycoloyl residue fro…	fbpB	GO:0001968,GO:0003674,GO:0003824,GO:0005488,GO:0005515,GO:0005575,GO:0005576,GO:0005618,GO:0005623,GO:0005886,GO:0008150,GO:0009605,GO:0009607,GO:0009893,GO:0010468,GO:0010604,GO:0010628,GO:0010755,GO:0010756,GO:0010954,GO:0016020,GO:0016740,GO:0016746,GO:0016747,GO:0019222,GO:0019899,GO:0030162,GO:0030312,GO:0031323,GO:0031325,GO:0032268,GO:0032270,GO:0035375,GO:0040007,GO:0042221,GO:0043207,GO:…	2.3.1.122,2.3.1.20	ko:K18851	ko00561,ko01100,map00561,map01100	M00089	R02251	RC00004,RC00041	ko00000,ko00001,ko00002,ko01000	-	-	-	Esterase
lcl|NC_009525.1_cds_WP_003899065.1_1975	419947.MRA_1898	4.31e-258	709.0	29WFR@1|root,30I1M@2|Bacteria,2IBPY@201174|Actinobacteria,232ZJ@1762|Mycobacteriaceae	201174|Actinobacteria	-	-	-	-	-	-	-	-	-	-	-	-	-	-	-
lcl|NC_009525.1_cds_MRA_RS22925_1977	419947.MRA_1900	9.04e-78	231.0	COG3315@1|root,COG3315@2|Bacteria,2GKDZ@201174|Actinobacteria,23376@1762|Mycobacteriaceae	201174|Actinobacteria	H	Exhibits S-adenosyl-L-methionine-dependent methyltransferase activity	-	-	-	-	-	-	-	-	-	-	-	-	LCM
lcl|NC_009525.1_cds_WP_003409509.1_1979	419947.MRA_1902	1.79e-92	270.0	2ASSI@1|root,31I7P@2|Bacteria,2IHP2@201174|Actinobacteria,239A0@1762|Mycobacteriaceae	201174|Actinobacteria	-	-	-	-	-	-	-	-	-	-	-	-	-	-	-
lcl|NC_009525.1_cds_MRA_RS10025_1984	419947.MRA_1907	2.68e-226	626.0	COG1063@1|root,COG1063@2|Bacteria,2GISW@201174|Actinobacteria,235I2@1762|Mycobacteriaceae	201174|Actinobacteria	E	Dehydrogenase	-	-	1.1.1.1	ko:K00001	ko00010,ko00071,ko00350,ko00625,ko00626,ko00830,ko00980,ko00982,ko01100,ko01110,ko01120,ko01130,ko01220,map00010,map00071,map00350,map00625,map00626,map00830,map00980,map00982,map01100,map01110,map01120,map01130,map01220	-	R00623,R00754,R02124,R04805,R04880,R05233,R05234,R06917,R06927,R07105,R08281,R08306,R08310	RC00050,RC00087,RC00088,RC00099,RC00116,RC00649,RC01734,RC02273	ko00000,ko00001,ko01000	-	-	-	ADH_N,ADH_zinc_N
lcl|NC_009525.1_cds_WP_003916001.1_1990	419947.MRA_1911	0.0	922.0	COG2114@1|root,COG2267@1|root,COG2114@2|Bacteria,COG2267@2|Bacteria,2IASU@201174|Actinobacteria,232Z7@1762|Mycobacteriaceae	201174|Actinobacteria	IT	PFAM Adenylate and Guanylate cyclase catalytic domain	lipJ	-	-	-	-	-	-	-	-	-	-	-	Abhydrolase_1,Guanylate_cyc
lcl|NC_009525.1_cds_WP_003900426.1_1991	419947.MRA_1912	5.74e-302	824.0	COG1058@1|root,COG1546@1|root,COG1058@2|Bacteria,COG1546@2|Bacteria,2IQ8T@201174|Actinobacteria,232Q5@1762|Mycobacteriaceae	201174|Actinobacteria	S	Belongs to the CinA family	cinA	GO:0005575,GO:0005623,GO:0005886,GO:0016020,GO:0044464,GO:0071944	3.5.1.42	ko:K03742,ko:K03743	ko00760,map00760	-	R02322	RC00100	ko00000,ko00001,ko01000	-	-	-	CinA,MoCF_biosynth
lcl|NC_009525.1_cds_WP_003900427.1_1992	419947.MRA_1913	8.22e-307	836.0	COG0477@1|root,COG0477@2|Bacteria,2HC9X@201174|Actinobacteria,2366E@1762|Mycobacteriaceae	201174|Actinobacteria	EGP	Sugar (and other) transporter	nanT	-	-	ko:K03290,ko:K08178,ko:K08369	-	-	-	-	ko00000,ko02000	2.A.1,2.A.1.12	-	-	MFS_1,Sugar_tr
lcl|NC_009525.1_cds_WP_003409542.1_1993	419947.MRA_1914	1.47e-86	255.0	COG1950@1|root,COG1950@2|Bacteria,2IHP5@201174|Actinobacteria,2397Q@1762|Mycobacteriaceae	201174|Actinobacteria	S	membrane	-	-	-	ko:K08972	-	-	-	-	ko00000	-	-	-	Phage_holin_4_2
lcl|NC_009525.1_cds_WP_003899072.1_1995	419947.MRA_1916	2.42e-236	649.0	COG0665@1|root,COG0665@2|Bacteria,2GN2M@201174|Actinobacteria,2352N@1762|Mycobacteriaceae	201174|Actinobacteria	E	FAD dependent oxidoreductase	aao	GO:0003674,GO:0003824,GO:0003884,GO:0006082,GO:0006520,GO:0006807,GO:0008150,GO:0008152,GO:0009987,GO:0016491,GO:0016638,GO:0016641,GO:0019752,GO:0043436,GO:0044237,GO:0044238,GO:0044281,GO:0046416,GO:0055114,GO:0071704,GO:1901564,GO:1901605	1.4.3.3	ko:K00273	ko00260,ko00311,ko00330,ko00472,ko01100,ko01130,ko04146,map00260,map00311,map00330,map00472,map01100,map01130,map04146	-	R00366,R02457,R02894,R02923,R04221,R07400	RC00006,RC00018,RC00135	ko00000,ko00001,ko01000	-	-	-	DAO
lcl|NC_009525.1_cds_WP_003900428.1_1996	419947.MRA_1917	1.83e-111	320.0	COG1840@1|root,COG1840@2|Bacteria,2GUQY@201174|Actinobacteria,23F6U@1762|Mycobacteriaceae	201174|Actinobacteria	P	ABC-type Fe3 transport system, periplasmic component	-	-	-	-	-	-	-	-	-	-	-	-	-
lcl|NC_009525.1_cds_WP_003899079.1_2002	419947.MRA_1923	2.41e-234	645.0	COG0604@1|root,COG0604@2|Bacteria,2GK40@201174|Actinobacteria,233XP@1762|Mycobacteriaceae	201174|Actinobacteria	C	Thought to be involved in fatty acid degradation. FadB and FadA are the alpha and beta subunits of the multifunctional enzyme complex of the fatty acid degradation cycle	fadB5	-	1.6.5.5	ko:K00344	-	-	-	-	ko00000,ko01000	-	-	-	ADH_N,ADH_zinc_N,ADH_zinc_N_2
lcl|NC_009525.1_cds_WP_003409577.1_2004	419947.MRA_1925	9.56e-97	281.0	2CK29@1|root,33KY0@2|Bacteria,2IPTN@201174|Actinobacteria,23AIB@1762|Mycobacteriaceae	201174|Actinobacteria	-	-	-	-	-	-	-	-	-	-	-	-	-	-	-
lcl|NC_009525.1_cds_WP_003906697.1_2005	419947.MRA_1926	4.02e-261	716.0	COG2224@1|root,COG2224@2|Bacteria,2I926@201174|Actinobacteria,232A9@1762|Mycobacteriaceae	201174|Actinobacteria	C	Isocitrate lyase	aceAb	GO:0003674,GO:0003824,GO:0004451,GO:0005975,GO:0006081,GO:0006082,GO:0006097,GO:0006102,GO:0008150,GO:0008152,GO:0009987,GO:0016829,GO:0016830,GO:0016833,GO:0019752,GO:0032787,GO:0043436,GO:0044237,GO:0044238,GO:0044262,GO:0044281,GO:0046421,GO:0046487,GO:0071704,GO:0072350	4.1.3.1	ko:K01637	ko00630,ko01100,ko01110,ko01120,ko01200,map00630,map01100,map01110,map01120,map01200	M00012	R00479	RC00311,RC00313	ko00000,ko00001,ko00002,ko01000	-	-	-	ICL
lcl|NC_009525.1_cds_WP_003906700.1_2008	419947.MRA_1929	2.92e-171	533.0	COG5263@1|root,COG5651@1|root,COG5263@2|Bacteria,COG5651@2|Bacteria,2HMEV@201174|Actinobacteria,233CN@1762|Mycobacteriaceae	201174|Actinobacteria	N	repeat protein	-	-	-	-	-	-	-	-	-	-	-	-	PPE,Pentapeptide_2
lcl|NC_009525.1_cds_WP_003899082.1_2009	419947.MRA_1930	7.2e-108	310.0	COG3832@1|root,COG3832@2|Bacteria,2IH7G@201174|Actinobacteria,23908@1762|Mycobacteriaceae	201174|Actinobacteria	S	Polyketide cyclase / dehydrase and lipid transport	-	-	-	-	-	-	-	-	-	-	-	-	Polyketide_cyc2
lcl|NC_009525.1_cds_WP_003900432.1_2010	419947.MRA_1931	4.04e-207	572.0	COG0204@1|root,COG0204@2|Bacteria,2I1UA@201174|Actinobacteria,2344M@1762|Mycobacteriaceae	201174|Actinobacteria	I	Glycerol acyltransferase	-	-	-	-	-	-	-	-	-	-	-	-	Acyltransferase
lcl|NC_009525.1_cds_WP_003409667.1_2012	419947.MRA_1933	1.79e-266	729.0	COG1680@1|root,COG1680@2|Bacteria,2GIX5@201174|Actinobacteria,237QK@1762|Mycobacteriaceae	201174|Actinobacteria	V	Beta-lactamase	-	-	-	ko:K18372	ko00640,map00640	-	R10705	RC00460,RC00461	ko00000,ko00001,ko01000	-	-	-	Beta-lactamase
lcl|NC_009525.1_cds_WP_003911710.1_2013	419947.MRA_1934	1.68e-315	859.0	COG1680@1|root,COG1680@2|Bacteria,2GJJB@201174|Actinobacteria,233VV@1762|Mycobacteriaceae	201174|Actinobacteria	V	beta-lactamase	lipD	-	-	-	-	-	-	-	-	-	-	-	Beta-lactamase
lcl|NC_009525.1_cds_WP_003900434.1_2014	419947.MRA_1935	9.84e-79	234.0	2AVU1@1|root,31MMM@2|Bacteria,2IM33@201174|Actinobacteria,239ZF@1762|Mycobacteriaceae	201174|Actinobacteria	-	-	-	-	-	-	-	-	-	-	-	-	-	-	-
lcl|NC_009525.1_cds_WP_003409685.1_2017	419947.MRA_1938	2.95e-194	537.0	COG3361@1|root,COG3361@2|Bacteria,2I6N0@201174|Actinobacteria,236FZ@1762|Mycobacteriaceae	201174|Actinobacteria	S	Uncharacterized conserved protein (COG2071)	wcoQ	-	-	ko:K09166	-	-	-	-	ko00000	-	-	-	DUF2071
lcl|NC_009525.1_cds_WP_003409686.1_2018	419947.MRA_1939	7.72e-180	501.0	COG1028@1|root,COG1028@2|Bacteria,2GK20@201174|Actinobacteria,23ETP@1762|Mycobacteriaceae	201174|Actinobacteria	IQ	Dehydrogenase reductase	-	-	1.1.1.127	ko:K00065	ko00040,map00040	-	R01542	RC00089	ko00000,ko00001,ko01000	-	-	iNJ661.Rv1928c	adh_short_C2
lcl|NC_009525.1_cds_WP_012054184.1_2019	419947.MRA_1940	3.47e-148	416.0	COG0243@1|root,COG0243@2|Bacteria,2GJ62@201174|Actinobacteria,238MS@1762|Mycobacteriaceae	201174|Actinobacteria	C	molybdopterin cofactor binding	-	-	-	-	-	-	-	-	-	-	-	-	MDMPI_N
lcl|NC_009525.1_cds_MRA_RS10205_2021	419947.MRA_1941	4.36e-189	525.0	COG4977@1|root,COG4977@2|Bacteria,2GM0M@201174|Actinobacteria,2362H@1762|Mycobacteriaceae	201174|Actinobacteria	K	Transcriptional regulator	-	GO:0005575,GO:0005623,GO:0005886,GO:0008150,GO:0009405,GO:0010468,GO:0010565,GO:0016020,GO:0019216,GO:0019217,GO:0019222,GO:0031323,GO:0044419,GO:0044464,GO:0050789,GO:0050794,GO:0051704,GO:0060255,GO:0062012,GO:0065007,GO:0071944,GO:0080090	-	-	-	-	-	-	-	-	-	-	DJ-1_PfpI,HTH_18
lcl|NC_009525.1_cds_WP_003900437.1_2023	419947.MRA_1943	2.59e-255	701.0	COG1960@1|root,COG1960@2|Bacteria,2GKVN@201174|Actinobacteria,2362Z@1762|Mycobacteriaceae	201174|Actinobacteria	I	acyl-CoA dehydrogenase	fadE18	-	-	-	-	-	-	-	-	-	-	-	Acyl-CoA_dh_1,Acyl-CoA_dh_N
[truncated: 829 more rows]

## Sheet: No. of genes based on COG
A	2	RNA processing and modification
C	105	energy production and conversion
[truncated: 18 more rows]
